# Supplementary material for: The Identification of Necroptosis-Related Subtypes, the Construction of a Prognostic Model, and the Characterization of the Tumor Microenvironment in Gliomas
Source: PubMed Central journal article supplement (PMC9231435; doi:10.3389/fonc.2022.899443), 2022-06-02
Supplement: Image_1.pdf [file Image_1.pdf]

## Supplementary Material

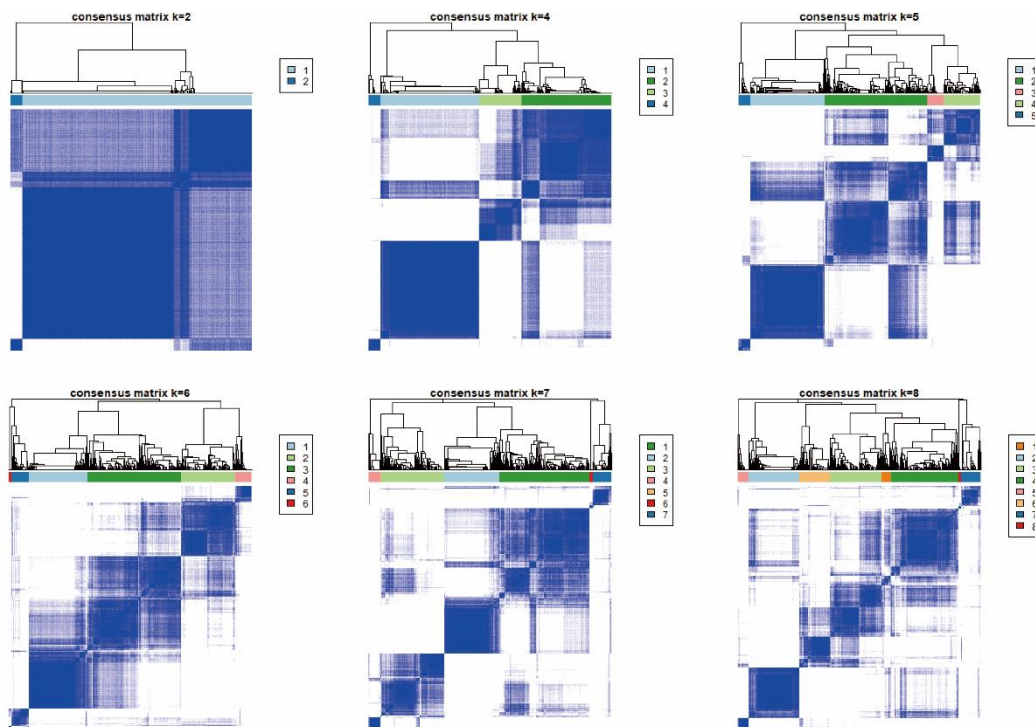

**Supplementary Figure 1.** (A-F) Heatmap of the consensus clustering matrix ( $k = 2, k=4-8$ ) dividing glioma patients into different NRGclusters.

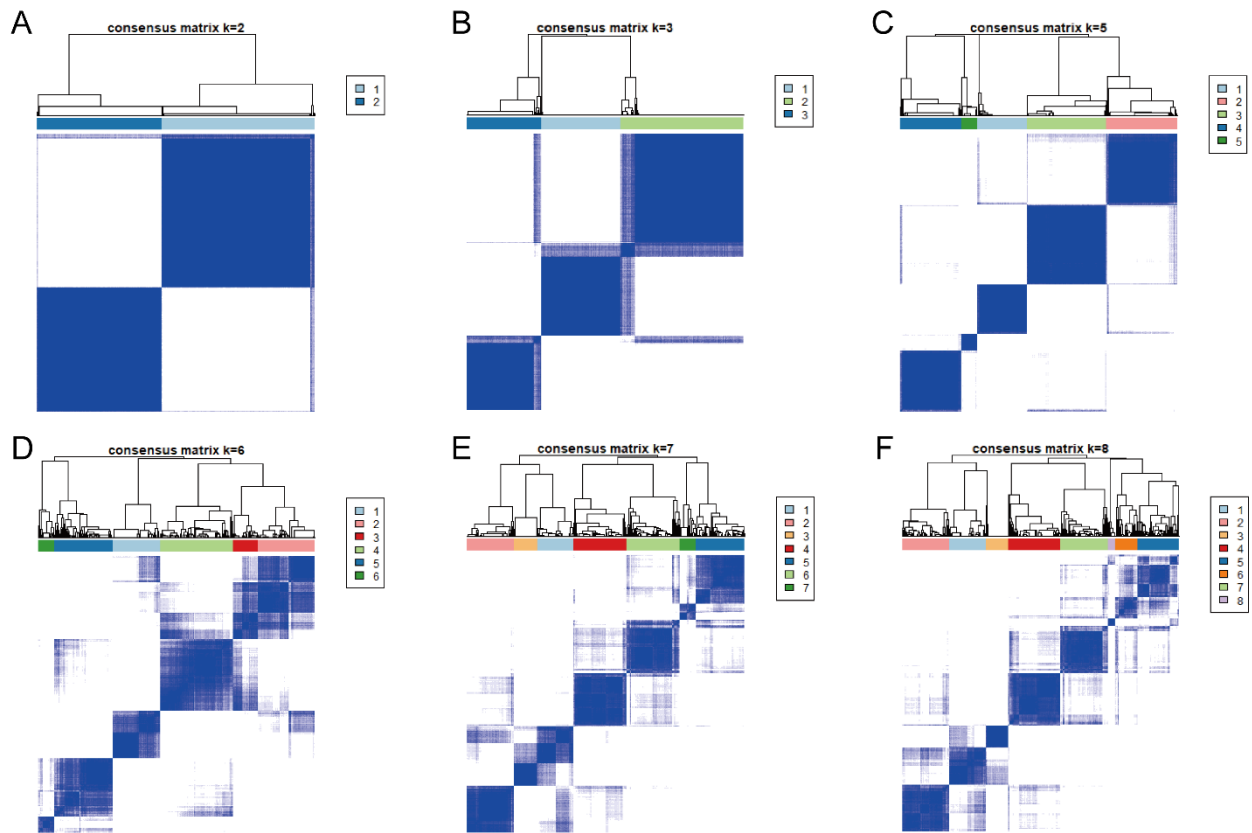

**Supplementary Figure 2.** (A-F) Heatmap of the consensus clustering matrix ( $k = 2-3, k=5-8$ ) dividing glioma patients into different geneClusters.

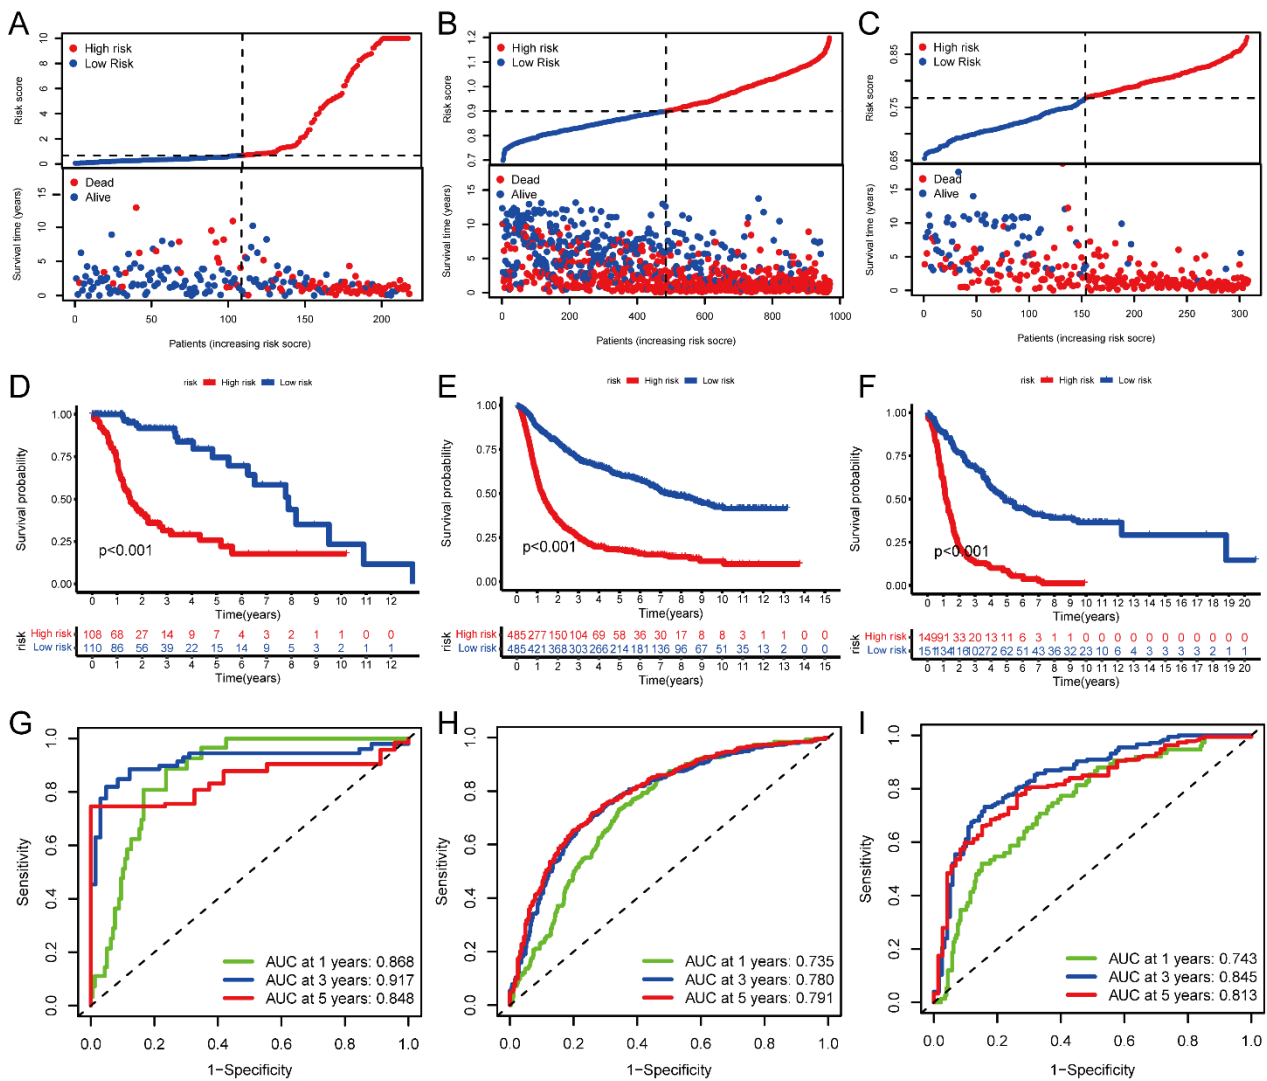

**Supplementary Figure 3.** Validation of NRG\_score in the testing datasets. (A-C) The Ranked dot and scatter plots of the distribution of the NRG\_score and survival status in glioma patients from the testing dataset of TCGA (A), CGGA (B), and Rembrandt (C). (D-F) Kaplan-Meier survival analysis of the two risk groups in glioma patients from the testing dataset of TCGA (D), CGGA (E), and Rembrandt (F). (G-I) ROC curves of the NRG\_score model for predicting the sensitivity and specificity of 1-, 3-, 5-year survival in glioma patients from the testing dataset of TCGA (G), CGGA (H), and Rembrandt (I).

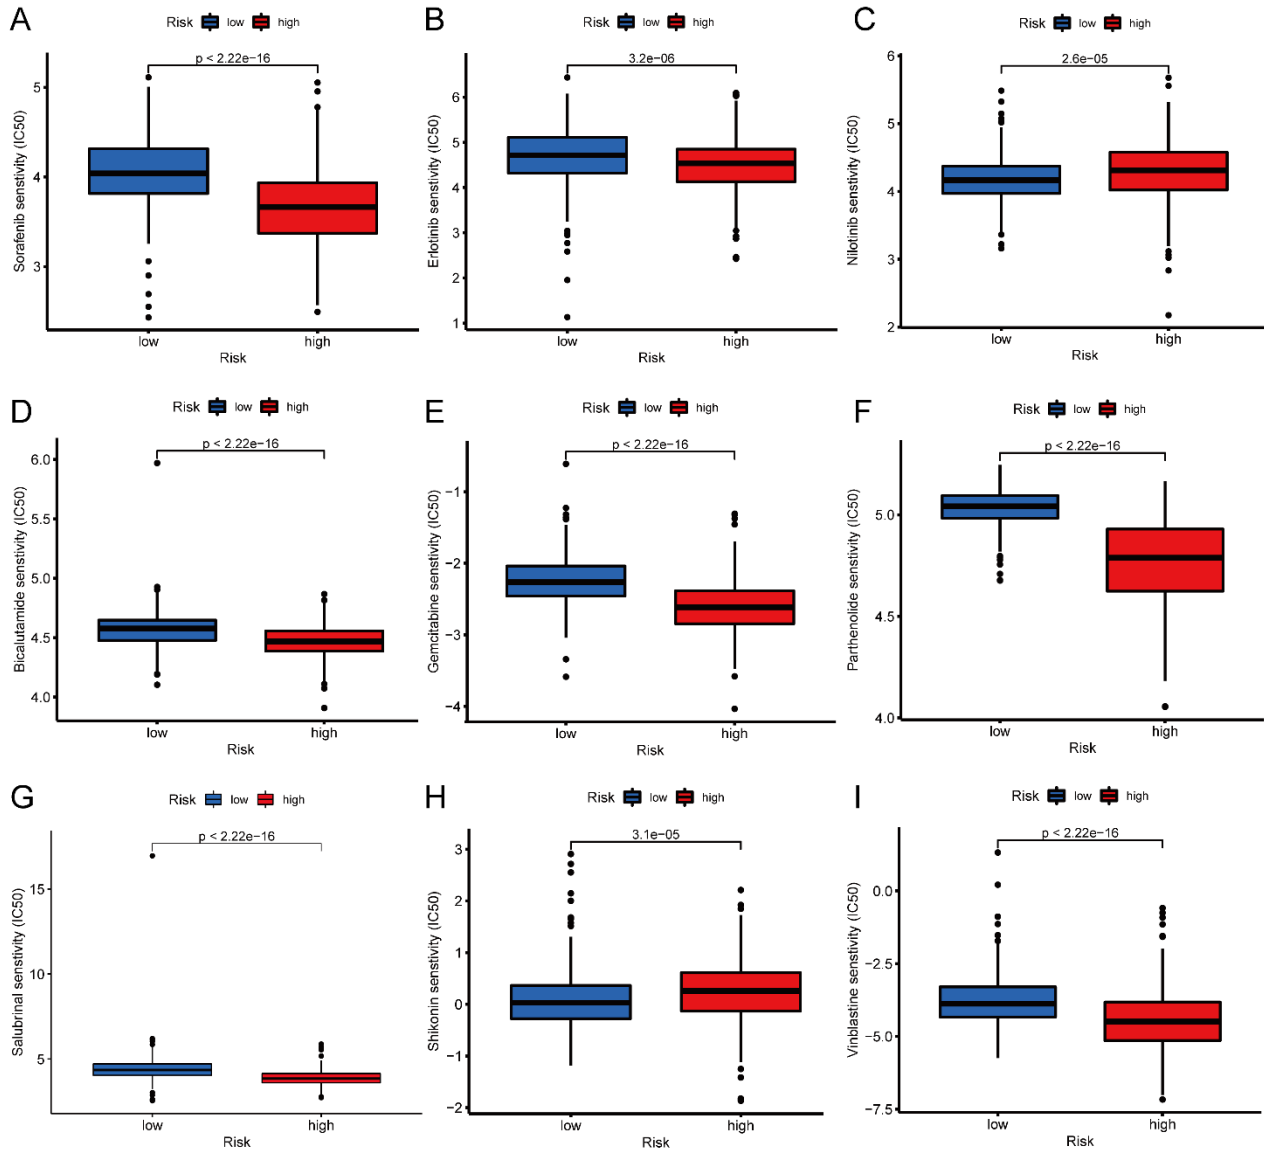

**Supplementary Figure 4.** Comparison of chemotherapy sensitivity in glioma between two risk groups.

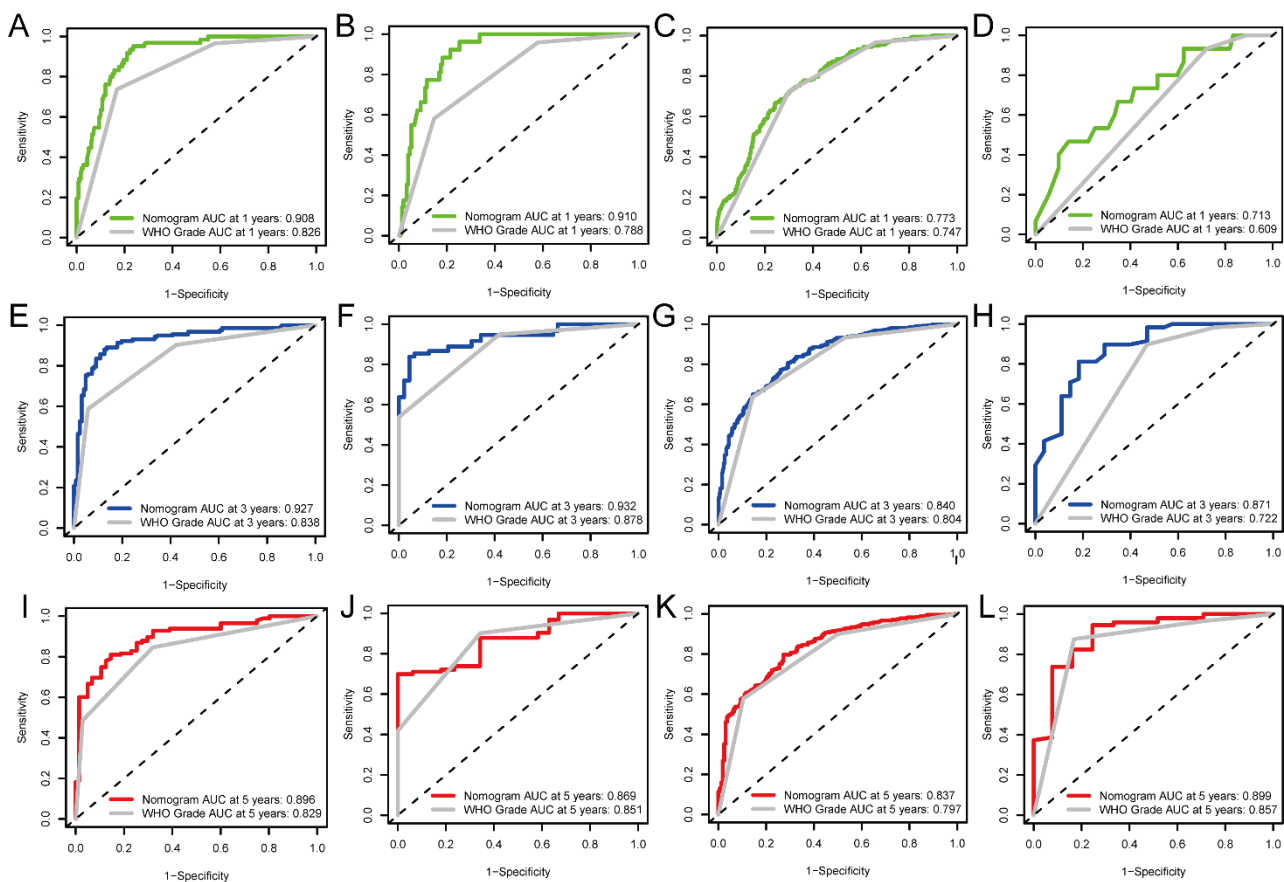

**Supplementary Figure 5.** Comparison of the nomogram and WHO grade in predicting the sensitivity and specificity of 1-year survival (A-D), 3-year survival (E-H), 5-year survival (I-L) in glioma patients from TCGA training dataset (A, E, I), TCGA testing dataset (B, F, J), CGGA (C, G, K) and Rembrandt (D, H, L).
