# Supplementary material for: The Identification of Necroptosis-Related Subtypes, the Construction of a Prognostic Model, and the Characterization of the Tumor Microenvironment in Gliomas
Source: Front Oncol. 2022 Jun 2;12:899443. doi: 10.3389/fonc.2022.899443 (PMC9231435; doi:10.3389/fonc.2022.899443)
Supplement: Supplementary file 2 [file Table_1.xlsx]

## Sheet: Supplementary Table 1
Supplementary Table 1: Clinical information of glioma patients from TCGA and CGGA dataset
Id	futime	fustat	Age	Gender	Grade	Histological_type	Radio_status (treated=1;un.treated=0)	Chemo_status (TMZ treated=1;un.treated=0)	IDH_mutation_status	1p/19q codeletion	MGMT promoter status
TCGA-DU-A7TI	1183	Dead	32	MALE	WHO III	Astrocytoma	1	1	NA	non-codel	Methylated
TCGA-S9-A7J2	62	Alive	25	MALE	WHO III	Oligodendroglioma	0	1	Mutant	codel	Methylated
TCGA-P5-A730	333	Alive	22	MALE	WHO III	Oligoastrocytoma	0	Unknown	Mutant	codel	Methylated
TCGA-HT-7474	114	Alive	52	MALE	WHO II	Oligoastrocytoma	0	Unknown	Mutant	non-codel	Methylated
TCGA-TM-A84C	492	Dead	32	MALE	WHO II	Astrocytoma	0	1	Wildtype	non-codel	Unmethylated
TCGA-TQ-A7RG	599	Alive	36	MALE	WHO II	Oligoastrocytoma	0	Unknown	Mutant	codel	Methylated
TCGA-HT-A74O	3	Alive	34	MALE	WHO III	Astrocytoma	Unknown	Unknown	Mutant	non-codel	Methylated
TCGA-S9-A7J3	629	Alive	52	FEMALE	WHO III	Oligodendroglioma	1	1	Mutant	codel	Methylated
TCGA-CS-6666	1428	Alive	22	MALE	WHO III	Astrocytoma	1	1	Mutant	non-codel	Methylated
TCGA-FG-7637	1219	Alive	49	MALE	WHO II	Oligoastrocytoma	0	Unknown	Mutant	non-codel	Methylated
TCGA-FG-A6IZ	457	Alive	60	MALE	WHO II	Oligodendroglioma	1	Unknown	Mutant	codel	Methylated
TCGA-S9-A6UB	3761	Alive	52	MALE	WHO II	Oligodendroglioma	0	Unknown	Mutant	codel	Methylated
TCGA-TQ-A7RP	914	Alive	66	MALE	WHO II	Oligoastrocytoma	1	Unknown	Wildtype	non-codel	Methylated
TCGA-DU-7015	2761	Alive	41	FEMALE	WHO II	Oligodendroglioma	1	1	Mutant	non-codel	Methylated
TCGA-HT-7857	7	Alive	24	FEMALE	WHO III	Astrocytoma	0	Unknown	Wildtype	non-codel	Unmethylated
TCGA-CS-4943	1106	Dead	37	MALE	WHO III	Astrocytoma	0	1	Mutant	non-codel	Methylated
TCGA-P5-A77W	584	Alive	37	FEMALE	WHO III	Oligoastrocytoma	0	Unknown	Mutant	codel	Methylated
TCGA-HT-7884	343	Alive	44	FEMALE	WHO II	Astrocytoma	1	1	Mutant	non-codel	Methylated
TCGA-DU-7007	1915	Dead	33	MALE	WHO II	Astrocytoma	Unknown	Unknown	Mutant	non-codel	Methylated
TCGA-FG-A6J1	500	Alive	44	FEMALE	WHO II	Oligodendroglioma	1	Unknown	Mutant	codel	Methylated
TCGA-E1-5304	1251	Dead	42	MALE	WHO III	Astrocytoma	1	1	Mutant	non-codel	Unmethylated
TCGA-E1-5322	3978	Dead	38	FEMALE	WHO II	Oligoastrocytoma	1	1	Mutant	non-codel	Methylated
TCGA-HT-8558	418	Alive	29	FEMALE	WHO II	Oligodendroglioma	0	Unknown	Wildtype	non-codel	Unmethylated
TCGA-CS-5394	8	Alive	40	MALE	WHO III	Astrocytoma	0	Unknown	Mutant	non-codel	Methylated
TCGA-QH-A6X9	58	Alive	73	FEMALE	WHO II	Oligodendroglioma	0	Unknown	Mutant	non-codel	Methylated
TCGA-TM-A84F	1796	Alive	48	MALE	WHO III	Astrocytoma	1	Unknown	Mutant	non-codel	Methylated
TCGA-S9-A6TZ	1120	Alive	39	FEMALE	WHO II	Astrocytoma	1	Unknown	Mutant	non-codel	Methylated
TCGA-DU-7294	2869	Alive	53	FEMALE	WHO II	Oligodendroglioma	0	Unknown	Mutant	codel	Methylated
TCGA-TQ-A7RN	1026	Alive	32	MALE	WHO II	Oligodendroglioma	1	Unknown	Mutant	codel	Methylated
TCGA-TM-A7C3	1666	Dead	43	FEMALE	WHO III	Astrocytoma	1	1	Wildtype	non-codel	Methylated
TCGA-DB-A75M	544	Alive	47	MALE	WHO II	Astrocytoma	1	1	Mutant	non-codel	Methylated
TCGA-DU-A5TS	964	Alive	42	MALE	WHO II	Oligodendroglioma	1	1	Mutant	non-codel	Methylated
TCGA-DB-A4XD	1210	Alive	32	MALE	WHO III	Astrocytoma	1	1	Mutant	non-codel	Methylated
TCGA-DH-5142	1943	Alive	29	MALE	WHO III	Astrocytoma	1	1	Mutant	non-codel	Methylated
TCGA-WY-A85D	1147	Alive	60	MALE	WHO II	Oligoastrocytoma	0	Unknown	Mutant	non-codel	Unmethylated
TCGA-P5-A5F0	287	Alive	33	MALE	WHO II	Oligodendroglioma	1	1	Mutant	codel	Methylated
TCGA-HT-7476	199	Alive	26	MALE	WHO II	Astrocytoma	1	1	Mutant	non-codel	Methylated
TCGA-TM-A84G	1236	Alive	54	FEMALE	WHO III	Oligodendroglioma	1	Unknown	Mutant	codel	Methylated
TCGA-VM-A8CF	609	Alive	44	FEMALE	WHO III	Astrocytoma	1	1	Mutant	non-codel	Methylated
TCGA-DB-A64W	438	Dead	65	FEMALE	WHO III	Oligoastrocytoma	1	1	Mutant	codel	Methylated
TCGA-HT-7482	3253	Alive	18	FEMALE	WHO II	Oligoastrocytoma	1	1	Mutant	non-codel	Methylated
TCGA-QH-A65R	461	Alive	38	FEMALE	WHO III	Oligodendroglioma	1	1	Mutant	codel	Methylated
TCGA-QH-A6CZ	279	Alive	38	MALE	WHO II	Oligoastrocytoma	0	Unknown	Mutant	codel	Methylated
TCGA-S9-A6U0	742	Dead	46	MALE	WHO III	Astrocytoma	1	1	Wildtype	non-codel	Methylated
TCGA-QH-A6CV	442	Alive	51	MALE	WHO III	Oligoastrocytoma	1	Unknown	Wildtype	non-codel	Unmethylated
TCGA-S9-A6TS	1891	Dead	48	FEMALE	WHO III	Astrocytoma	1	1	Mutant	non-codel	Methylated
TCGA-HT-8106	3	Alive	53	MALE	WHO III	Astrocytoma	0	Unknown	Mutant	non-codel	Methylated
TCGA-DU-A76L	814	Dead	54	MALE	WHO III	Oligodendroglioma	1	1	Wildtype	non-codel	Methylated
TCGA-HT-7611	1752	Alive	36	MALE	WHO II	Oligoastrocytoma	0	Unknown	Mutant	non-codel	Methylated
TCGA-FG-A60J	449	Alive	47	FEMALE	WHO II	Oligoastrocytoma	0	Unknown	Mutant	non-codel	Methylated
TCGA-FG-A60L	655	Alive	34	FEMALE	WHO II	Astrocytoma	0	Unknown	Mutant	non-codel	Methylated
TCGA-DU-A6S2	777	Alive	37	FEMALE	WHO II	Oligodendroglioma	0	Unknown	Mutant	codel	Methylated
TCGA-DB-A4XH	962	Alive	53	FEMALE	WHO II	Oligoastrocytoma	0	Unknown	Mutant	codel	Methylated
TCGA-S9-A6WI	2585	Alive	56	FEMALE	WHO II	Oligoastrocytoma	1	Unknown	Mutant	non-codel	Methylated
TCGA-FG-A6J3	677	Alive	52	FEMALE	WHO III	Astrocytoma	1	1	Mutant	non-codel	Methylated
TCGA-FG-8189	685	Alive	33	FEMALE	WHO II	Oligodendroglioma	1	1	Mutant	non-codel	Methylated
TCGA-DB-A4XB	919	Alive	38	MALE	WHO III	Astrocytoma	1	1	Mutant	non-codel	Methylated
TCGA-DU-8166	516	Alive	29	FEMALE	WHO II	Oligoastrocytoma	1	1	Mutant	non-codel	Methylated
TCGA-FG-A60K	542	Alive	34	FEMALE	WHO II	Oligoastrocytoma	0	Unknown	Mutant	codel	Methylated
TCGA-FG-8185	433	Alive	37	MALE	WHO III	Astrocytoma	1	1	Mutant	non-codel	Methylated
TCGA-S9-A7QY	863	Alive	35	FEMALE	WHO II	Oligoastrocytoma	0	1	Mutant	codel	Methylated
TCGA-DB-A64L	736	Alive	67	FEMALE	WHO II	Oligodendroglioma	0	Unknown	Mutant	codel	Methylated
TCGA-DU-8164	651	Alive	51	MALE	WHO II	Oligodendroglioma	0	1	Mutant	codel	Methylated
TCGA-VM-A8CA	411	Alive	54	MALE	WHO II	Oligodendroglioma	0	1	Mutant	non-codel	Methylated
TCGA-HT-7609	1399	Alive	34	MALE	WHO III	Oligoastrocytoma	1	1	Mutant	non-codel	Methylated
TCGA-DU-8158	155	Dead	57	FEMALE	WHO III	Astrocytoma	1	1	Wildtype	non-codel	Unmethylated
TCGA-HT-7881	1079	Alive	38	MALE	WHO II	Oligodendroglioma	1	Unknown	Mutant	codel	Methylated
TCGA-VW-A8FI	245	Dead	66	MALE	WHO III	Astrocytoma	1	1	Wildtype	non-codel	Unmethylated
TCGA-VM-A8C8	1397	Alive	50	FEMALE	WHO II	Oligodendroglioma	1	1	Mutant	non-codel	Unmethylated
TCGA-RY-A847	933	Alive	45	MALE	WHO II	Oligodendroglioma	0	Unknown	Mutant	codel	Methylated
TCGA-QH-A86X	337	Alive	33	MALE	WHO II	Oligodendroglioma	0	Unknown	Mutant	codel	Methylated
TCGA-TM-A84M	754	Alive	40	MALE	WHO III	Oligodendroglioma	1	1	Mutant	codel	Methylated
TCGA-DU-7010	456	Dead	58	FEMALE	WHO III	Astrocytoma	1	1	Mutant	non-codel	Methylated
TCGA-DU-5849	443	Alive	48	MALE	WHO II	Oligodendroglioma	0	1	Mutant	codel	Methylated
TCGA-VM-A8CB	3	Alive	33	MALE	WHO III	Oligodendroglioma	Unknown	Unknown	Mutant	codel	Methylated
TCGA-DU-5853	407	Alive	29	MALE	WHO II	Oligoastrocytoma	1	1	Mutant	non-codel	Methylated
TCGA-DU-A5TY	1033	Dead	46	FEMALE	WHO III	Astrocytoma	1	1	Wildtype	non-codel	Methylated
TCGA-TM-A84O	1011	Dead	61	FEMALE	WHO III	Oligodendroglioma	1	Unknown	Mutant	codel	Methylated
TCGA-RY-A83Z	301	Alive	54	FEMALE	WHO III	Astrocytoma	1	Unknown	Mutant	non-codel	Methylated
TCGA-HT-8564	478	Alive	47	MALE	WHO III	Astrocytoma	1	1	Wildtype	non-codel	Unmethylated
TCGA-FG-8186	487	Alive	42	FEMALE	WHO III	Oligoastrocytoma	1	Unknown	Mutant	codel	Methylated
TCGA-DU-8168	431	Alive	55	FEMALE	WHO III	Oligodendroglioma	1	1	Mutant	codel	Methylated
TCGA-DB-5278	2772	Alive	17	MALE	WHO II	Oligodendroglioma	1	Unknown	Mutant	codel	Methylated
TCGA-S9-A6U6	1069	Alive	28	MALE	WHO III	Astrocytoma	1	Unknown	Mutant	non-codel	Methylated
TCGA-DU-7018	933	Dead	57	FEMALE	WHO III	Oligodendroglioma	0	1	Mutant	codel	Methylated
TCGA-IK-7675	578	Dead	43	MALE	WHO II	Oligodendroglioma	1	1	Mutant	non-codel	Methylated
TCGA-HT-7680	23	Alive	32	FEMALE	WHO II	Astrocytoma	0	Unknown	Wildtype	non-codel	Unmethylated
TCGA-P5-A5EX	243	Alive	41	FEMALE	WHO III	Oligodendroglioma	1	1	Mutant	codel	Methylated
TCGA-TM-A84S	454	Alive	36	MALE	WHO III	Oligodendroglioma	0	Unknown	Mutant	codel	Methylated
TCGA-DB-5281	2381	Alive	61	MALE	WHO III	Oligoastrocytoma	1	1	Mutant	non-codel	Methylated
TCGA-HT-7875	10	Alive	56	MALE	WHO II	Oligodendroglioma	1	Unknown	Mutant	codel	Methylated
TCGA-S9-A6TW	1250	Alive	40	MALE	WHO III	Oligodendroglioma	1	1	Mutant	codel	Methylated
TCGA-E1-A7YY	4445	Dead	27	FEMALE	WHO II	Oligodendroglioma	1	1	Mutant	non-codel	Methylated
TCGA-FG-8188	455	Alive	41	MALE	WHO II	Oligoastrocytoma	1	Unknown	Mutant	non-codel	Methylated
TCGA-TM-A84T	724	Alive	19	MALE	WHO II	Oligoastrocytoma	0	Unknown	Mutant	non-codel	Methylated
TCGA-DB-A75P	492	Alive	25	FEMALE	WHO II	Astrocytoma	0	Unknown	Wildtype	non-codel	Unmethylated
TCGA-DU-7013	269	Dead	59	MALE	WHO III	Astrocytoma	1	1	Wildtype	non-codel	Unmethylated
TCGA-HT-7477	738	Alive	62	MALE	WHO III	Astrocytoma	1	1	Mutant	non-codel	Methylated
TCGA-P5-A735	292	Alive	38	FEMALE	WHO II	Astrocytoma	0	Unknown	Mutant	non-codel	Methylated
TCGA-RY-A843	63	Alive	30	MALE	WHO III	Astrocytoma	0	Unknown	Mutant	non-codel	Methylated
TCGA-DB-5280	1112	Alive	43	MALE	WHO II	Oligoastrocytoma	0	Unknown	Mutant	non-codel	Methylated
TCGA-E1-A7YS	466	Dead	71	MALE	WHO III	Oligodendroglioma	1	1	Mutant	codel	Methylated
TCGA-EZ-7264	1201	Alive	47	FEMALE	WHO II	Oligodendroglioma	0	Unknown	Mutant	codel	Methylated
TCGA-E1-A7YJ	592	Dead	55	MALE	WHO III	Astrocytoma	1	1	Wildtype	non-codel	Unmethylated
TCGA-DB-A4XG	2219	Alive	34	MALE	WHO III	Oligodendroglioma	0	1	Mutant	codel	Methylated
TCGA-S9-A6U5	992	Alive	33	MALE	WHO II	Astrocytoma	0	Unknown	Mutant	codel	Methylated
TCGA-DU-6396	2286	Dead	31	FEMALE	WHO III	Oligoastrocytoma	1	1	Mutant	non-codel	Methylated
TCGA-DB-A64V	889	Alive	54	MALE	WHO II	Oligodendroglioma	0	1	Mutant	codel	Methylated
TCGA-P5-A72W	317	Alive	35	MALE	WHO III	Astrocytoma	1	Unknown	Mutant	non-codel	Unmethylated
TCGA-FG-6688	571	Alive	59	FEMALE	WHO III	Astrocytoma	1	1	Wildtype	non-codel	Methylated
TCGA-HT-A74K	467	Alive	58	FEMALE	WHO III	Oligodendroglioma	1	1	Mutant	codel	Methylated
TCGA-RY-A840	854	Alive	47	MALE	WHO III	Oligodendroglioma	0	Unknown	Mutant	codel	Methylated
TCGA-S9-A6U8	2988	Dead	24	MALE	WHO II	Astrocytoma	1	1	Mutant	non-codel	Methylated
TCGA-HT-A5RB	3	Alive	24	MALE	WHO II	Astrocytoma	Unknown	Unknown	Mutant	non-codel	Methylated
TCGA-FG-A4MT	1164	Alive	27	FEMALE	WHO II	Oligodendroglioma	1	Unknown	Mutant	non-codel	Methylated
TCGA-P5-A5ET	0	Alive	27	MALE	WHO II	Oligodendroglioma	Unknown	Unknown	Mutant	codel	Methylated
TCGA-DU-A5TW	760	Alive	33	FEMALE	WHO III	Astrocytoma	0	Unknown	Mutant	non-codel	Methylated
TCGA-S9-A6WL	946	Alive	52	MALE	WHO III	Astrocytoma	1	Unknown	Mutant	codel	Methylated
TCGA-DU-5854	257	Alive	57	FEMALE	WHO III	Astrocytoma	1	1	Wildtype	non-codel	Unmethylated
TCGA-DU-6542	73	Alive	25	MALE	WHO III	Oligoastrocytoma	1	1	Mutant	non-codel	Methylated
TCGA-DB-A4XF	1021	Alive	41	FEMALE	WHO III	Astrocytoma	1	1	Mutant	non-codel	Methylated
TCGA-DU-7292	242	Dead	69	MALE	WHO III	Astrocytoma	1	1	Wildtype	non-codel	Methylated
TCGA-FG-6692	561	Dead	63	MALE	WHO III	Oligodendroglioma	1	1	Wildtype	non-codel	Methylated
TCGA-E1-5305	2433	Dead	34	MALE	WHO III	Astrocytoma	1	1	Mutant	non-codel	Methylated
TCGA-VM-A8CD	240	Dead	58	MALE	WHO III	Astrocytoma	1	Unknown	Wildtype	non-codel	Unmethylated
TCGA-CS-5397	194	Dead	54	FEMALE	WHO III	Astrocytoma	1	1	Wildtype	non-codel	Unmethylated
TCGA-DU-6397	1401	Dead	45	MALE	WHO III	Oligodendroglioma	1	1	Mutant	codel	Methylated
TCGA-E1-5303	2052	Dead	38	MALE	WHO III	Astrocytoma	1	1	Mutant	non-codel	Methylated
TCGA-HT-7610	1706	Alive	25	FEMALE	WHO II	Oligoastrocytoma	0	Unknown	Mutant	non-codel	Methylated
TCGA-S9-A6U1	785	Alive	22	FEMALE	WHO III	Astrocytoma	0	1	Mutant	non-codel	Methylated
TCGA-HT-7483	5255	Alive	14	MALE	WHO II	Oligoastrocytoma	1	1	Mutant	non-codel	Unmethylated
TCGA-S9-A6TY	1076	Alive	50	MALE	WHO II	Oligodendroglioma	0	1	Mutant	codel	Methylated
TCGA-DU-6399	2000	Dead	54	MALE	WHO II	Oligodendroglioma	1	Unknown	Mutant	non-codel	Methylated
TCGA-E1-A7YW	1120	Dead	28	MALE	WHO II	Oligoastrocytoma	1	1	Mutant	non-codel	Methylated
TCGA-HT-7608	671	Alive	61	MALE	WHO II	Oligoastrocytoma	0	Unknown	Mutant	codel	Methylated
TCGA-S9-A7R1	5166	Dead	35	MALE	WHO II	Oligodendroglioma	1	1	Mutant	codel	Methylated
TCGA-WY-A85A	1320	Alive	20	MALE	WHO II	Astrocytoma	0	Unknown	Mutant	non-codel	Methylated
TCGA-TQ-A7RH	486	Alive	39	MALE	WHO II	Oligoastrocytoma	1	Unknown	Mutant	non-codel	Methylated
TCGA-DH-5140	607	Dead	38	FEMALE	WHO III	Oligoastrocytoma	1	1	Wildtype	non-codel	Unmethylated
TCGA-DU-6403	354	Dead	60	FEMALE	WHO III	Oligoastrocytoma	1	1	Wildtype	non-codel	Unmethylated
TCGA-FG-A4MW	559	Dead	63	MALE	WHO III	Oligoastrocytoma	1	1	Wildtype	non-codel	Methylated
TCGA-CS-4944	1828	Alive	50	MALE	WHO II	Astrocytoma	1	Unknown	Mutant	non-codel	Methylated
TCGA-HW-A5KL	878	Alive	42	FEMALE	WHO II	Astrocytoma	1	1	Mutant	non-codel	Methylated
TCGA-FN-7833	837	Alive	25	MALE	WHO III	Oligoastrocytoma	1	1	Mutant	non-codel	Methylated
TCGA-HT-7479	1227	Alive	44	MALE	WHO III	Astrocytoma	1	1	Mutant	non-codel	Methylated
TCGA-P5-A72X	403	Alive	21	MALE	WHO III	Astrocytoma	1	Unknown	Mutant	non-codel	Methylated
TCGA-HT-A74L	336	Alive	22	FEMALE	WHO II	Oligoastrocytoma	Unknown	Unknown	Mutant	codel	Methylated
TCGA-DU-8161	722	Dead	63	FEMALE	WHO III	Oligoastrocytoma	1	1	Wildtype	non-codel	Unmethylated
TCGA-QH-A6XA	502	Alive	23	FEMALE	WHO II	Oligoastrocytoma	0	Unknown	Mutant	non-codel	Methylated
TCGA-HT-7468	203	Alive	30	MALE	WHO III	Oligodendroglioma	0	1	Mutant	codel	Methylated
TCGA-CS-4941	234	Dead	67	MALE	WHO III	Astrocytoma	1	1	Wildtype	non-codel	Methylated
TCGA-E1-5318	2379	Dead	42	FEMALE	WHO II	Oligodendroglioma	1	1	Mutant	codel	Methylated
TCGA-S9-A7IQ	1099	Alive	45	FEMALE	WHO II	Oligoastrocytoma	0	Unknown	Mutant	codel	Methylated
TCGA-S9-A89V	569	Alive	70	MALE	WHO III	Astrocytoma	1	1	Wildtype	non-codel	Methylated
TCGA-DU-6400	37	Dead	66	FEMALE	WHO II	Oligodendroglioma	0	Unknown	Mutant	codel	Methylated
TCGA-E1-A7YE	886	Dead	32	FEMALE	WHO III	Astrocytoma	1	1	Mutant	non-codel	Unmethylated
TCGA-FG-A710	1115	Alive	50	FEMALE	WHO II	Oligodendroglioma	0	1	Mutant	codel	Methylated
TCGA-HT-8563	860	Alive	30	FEMALE	WHO III	Astrocytoma	1	Unknown	Mutant	non-codel	Unmethylated
TCGA-DH-A66F	523	Alive	49	MALE	WHO II	Oligodendroglioma	0	Unknown	Mutant	codel	Methylated
TCGA-TQ-A7RU	1032	Alive	51	MALE	WHO II	Oligodendroglioma	0	Unknown	Mutant	codel	Methylated
TCGA-HT-7616	7	Dead	75	MALE	WHO III	Oligodendroglioma	0	Unknown	Mutant	codel	Methylated
TCGA-FG-8187	611	Alive	31	MALE	WHO II	Oligoastrocytoma	0	Unknown	Mutant	codel	Methylated
TCGA-HT-8113	900	Alive	49	FEMALE	WHO II	Oligodendroglioma	1	1	Mutant	non-codel	Methylated
TCGA-TM-A84Q	772	Alive	31	MALE	WHO II	Astrocytoma	1	Unknown	Mutant	non-codel	Methylated
TCGA-DU-7304	709	Dead	43	MALE	WHO III	Oligoastrocytoma	1	1	Mutant	non-codel	Methylated
TCGA-HT-A74J	320	Alive	33	MALE	WHO II	Oligoastrocytoma	0	Unknown	Mutant	non-codel	Unmethylated
TCGA-DU-7306	1277	Alive	67	MALE	WHO II	Oligoastrocytoma	1	1	Mutant	non-codel	Methylated
TCGA-HT-7677	494	Alive	53	MALE	WHO III	Oligodendroglioma	1	1	Mutant	codel	Methylated
TCGA-HT-7470	1220	Dead	37	MALE	WHO III	Oligodendroglioma	1	1	Mutant	non-codel	Methylated
TCGA-DB-5275	1458	Alive	36	MALE	WHO III	Oligoastrocytoma	1	1	Mutant	non-codel	Methylated
TCGA-E1-A7YK	378	Dead	52	MALE	WHO III	Astrocytoma	1	1	Mutant	non-codel	Methylated
TCGA-HT-7880	162	Alive	30	MALE	WHO II	Oligoastrocytoma	0	Unknown	Mutant	non-codel	Methylated
TCGA-FG-7643	611	Alive	49	FEMALE	WHO II	Oligoastrocytoma	0	Unknown	Wildtype	non-codel	Methylated
TCGA-FG-7638	686	Alive	31	FEMALE	WHO III	Oligodendroglioma	1	1	Mutant	codel	Methylated
TCGA-HT-7620	434	Alive	40	MALE	WHO III	Oligodendroglioma	1	1	Mutant	codel	Methylated
TCGA-HT-A61A	194	Alive	20	FEMALE	WHO II	Oligodendroglioma	1	1	Mutant	non-codel	Methylated
TCGA-DU-6393	1585	Dead	66	MALE	WHO III	Oligodendroglioma	1	1	Mutant	codel	Methylated
TCGA-HT-8109	169	Alive	64	MALE	WHO III	Oligodendroglioma	1	Unknown	Mutant	codel	Methylated
TCGA-P5-A781	134	Alive	34	FEMALE	WHO III	Astrocytoma	1	Unknown	Mutant	codel	Methylated
TCGA-HT-7603	705	Alive	29	MALE	WHO II	Oligodendroglioma	1	Unknown	Mutant	non-codel	Methylated
TCGA-HT-A617	491	Alive	47	MALE	WHO II	Oligodendroglioma	Unknown	Unknown	Wildtype	non-codel	Unmethylated
TCGA-IK-8125	1301	Alive	62	MALE	WHO III	Oligoastrocytoma	1	1	Mutant	codel	Methylated
TCGA-DB-A4X9	1412	Alive	33	FEMALE	WHO II	Oligoastrocytoma	0	Unknown	Mutant	non-codel	Methylated
TCGA-CS-6665	1568	Alive	51	FEMALE	WHO III	Astrocytoma	1	1	Mutant	non-codel	Methylated
TCGA-HT-A616	55	Alive	36	FEMALE	WHO II	Astrocytoma	0	Unknown	Mutant	non-codel	Methylated
TCGA-DU-A7TD	228	Dead	52	MALE	WHO III	Oligoastrocytoma	1	1	Wildtype	non-codel	Unmethylated
TCGA-FG-5962	1453	Alive	54	MALE	WHO III	Oligodendroglioma	1	1	Mutant	codel	Methylated
TCGA-DU-A7TC	1137	Alive	32	MALE	WHO II	Astrocytoma	0	Unknown	Mutant	non-codel	Methylated
TCGA-HT-A618	512	Alive	37	FEMALE	WHO III	Astrocytoma	1	1	Mutant	non-codel	Methylated
TCGA-HW-7486	1721	Alive	37	MALE	WHO II	Oligodendroglioma	0	1	Mutant	codel	Methylated
TCGA-HT-7686	1300	Alive	29	FEMALE	WHO III	Astrocytoma	1	1	Mutant	non-codel	Methylated
TCGA-HW-A5KM	630	Alive	35	MALE	WHO II	Astrocytoma	0	Unknown	Mutant	non-codel	Methylated
TCGA-QH-A65S	77	Alive	32	FEMALE	WHO II	Oligoastrocytoma	0	Unknown	Mutant	non-codel	Methylated
TCGA-E1-A7YV	987	Dead	26	FEMALE	WHO III	Oligoastrocytoma	1	1	Mutant	non-codel	Methylated
TCGA-HT-7475	530	Alive	67	MALE	WHO III	Oligoastrocytoma	1	1	Mutant	non-codel	Methylated
TCGA-HT-7467	3	Alive	54	MALE	WHO II	Oligodendroglioma	Unknown	Unknown	Mutant	codel	Methylated
TCGA-TM-A84I	854	Alive	30	MALE	WHO III	Astrocytoma	1	Unknown	Mutant	non-codel	Methylated
TCGA-FG-8182	416	Alive	35	MALE	WHO II	Oligodendroglioma	0	Unknown	Mutant	non-codel	Methylated
TCGA-TM-A7C5	1500	Alive	30	MALE	WHO II	Oligoastrocytoma	1	Unknown	Mutant	codel	Methylated
TCGA-S9-A6WQ	428	Alive	57	FEMALE	WHO II	Oligoastrocytoma	0	Unknown	Mutant	non-codel	Methylated
TCGA-DU-5872	532	Alive	43	FEMALE	WHO II	Oligoastrocytoma	1	1	Mutant	non-codel	Methylated
TCGA-E1-5311	4084	Dead	31	MALE	WHO III	Oligodendroglioma	1	1	Mutant	codel	Methylated
TCGA-DU-A76O	522	Alive	30	MALE	WHO II	Astrocytoma	1	1	Mutant	non-codel	Methylated
TCGA-HT-8107	14	Alive	62	MALE	WHO II	Oligodendroglioma	0	Unknown	Wildtype	non-codel	Methylated
TCGA-FG-8181	862	Alive	23	MALE	WHO III	Oligoastrocytoma	1	1	Wildtype	non-codel	Unmethylated
TCGA-VM-A8CH	714	Alive	24	FEMALE	WHO II	Astrocytoma	0	Unknown	Mutant	non-codel	Unmethylated
TCGA-FG-7636	544	Alive	48	MALE	WHO III	Astrocytoma	1	1	Mutant	non-codel	Methylated
TCGA-QH-A6X3	313	Alive	27	MALE	WHO II	Oligoastrocytoma	0	Unknown	Mutant	non-codel	Methylated
TCGA-CS-5395	639	Dead	43	MALE	WHO II	Oligodendroglioma	1	1	Wildtype	non-codel	Unmethylated
TCGA-DB-5276	2218	Alive	32	MALE	WHO III	Oligoastrocytoma	1	1	Mutant	non-codel	Methylated
TCGA-E1-A7YU	23	Dead	42	MALE	WHO III	Oligoastrocytoma	0	0	Mutant	non-codel	Methylated
TCGA-DU-5871	576	Alive	37	FEMALE	WHO II	Oligoastrocytoma	1	1	Mutant	non-codel	Methylated
TCGA-E1-A7Z6	984	Dead	41	FEMALE	WHO II	Astrocytoma	1	1	Mutant	non-codel	Methylated
TCGA-DU-6401	2660	Dead	31	FEMALE	WHO II	Oligodendroglioma	1	1	Mutant	non-codel	Methylated
TCGA-DH-5144	748	Alive	56	FEMALE	WHO III	Oligodendroglioma	1	Unknown	Mutant	codel	Methylated
TCGA-WY-A858	1337	Alive	32	FEMALE	WHO III	Astrocytoma	1	Unknown	Mutant	non-codel	Methylated
TCGA-DB-A64U	846	Alive	38	FEMALE	WHO II	Oligoastrocytoma	0	Unknown	Mutant	codel	Methylated
TCGA-FG-8191	992	Alive	30	MALE	WHO III	Oligodendroglioma	1	1	Mutant	non-codel	Unmethylated
TCGA-TQ-A7RK	1341	Alive	29	MALE	WHO II	Oligoastrocytoma	0	Unknown	Mutant	non-codel	Methylated
TCGA-HT-7472	1	Alive	38	MALE	WHO II	Oligodendroglioma	0	Unknown	Mutant	non-codel	Methylated
TCGA-DB-5277	1547	Dead	34	MALE	WHO III	Astrocytoma	1	1	Mutant	non-codel	Methylated
TCGA-VV-A829	1127	Alive	44	MALE	WHO III	Oligoastrocytoma	1	1	Mutant	codel	Methylated
TCGA-DH-A7UV	566	Alive	49	MALE	WHO III	Astrocytoma	1	1	Mutant	non-codel	Methylated
TCGA-HW-8319	1209	Dead	34	FEMALE	WHO III	Astrocytoma	1	1	Mutant	non-codel	Unmethylated
TCGA-WY-A85C	1426	Alive	36	MALE	WHO II	Astrocytoma	1	Unknown	Mutant	non-codel	Methylated
TCGA-P5-A5EW	204	Alive	20	FEMALE	WHO II	Astrocytoma	Unknown	Unknown	Mutant	non-codel	Methylated
TCGA-DB-A75O	935	Alive	29	MALE	WHO III	Astrocytoma	Unknown	Unknown	Mutant	non-codel	Methylated
TCGA-DU-A7TA	2565	Alive	32	MALE	WHO II	Oligodendroglioma	1	1	Mutant	non-codel	Methylated
TCGA-E1-A7Z4	4412	Dead	35	MALE	WHO II	Astrocytoma	1	1	Mutant	non-codel	Methylated
TCGA-S9-A6TV	571	Alive	50	MALE	WHO III	Oligoastrocytoma	1	1	Mutant	non-codel	Methylated
TCGA-HW-7495	1078	Alive	45	FEMALE	WHO II	Oligodendroglioma	0	Unknown	Mutant	codel	Methylated
TCGA-HT-7481	2918	Alive	39	MALE	WHO II	Oligodendroglioma	1	Unknown	Mutant	codel	Methylated
TCGA-E1-A7YQ	1578	Dead	58	FEMALE	WHO III	Oligodendroglioma	1	1	Wildtype	non-codel	Unmethylated
TCGA-DB-A64P	916	Alive	40	MALE	WHO III	Oligodendroglioma	0	1	Mutant	codel	Methylated
TCGA-HT-7684	184	Alive	58	MALE	WHO III	Oligoastrocytoma	0	Unknown	Mutant	non-codel	Methylated
TCGA-TQ-A7RR	787	Alive	38	MALE	WHO II	Oligoastrocytoma	1	Unknown	Mutant	non-codel	Unmethylated
TCGA-HT-7691	3	Alive	31	FEMALE	WHO II	Astrocytoma	0	Unknown	Wildtype	non-codel	Unmethylated
TCGA-HT-A5R7	615	Alive	33	FEMALE	WHO III	Astrocytoma	1	1	Mutant	non-codel	Methylated
TCGA-HT-8104	372	Alive	51	FEMALE	WHO III	Astrocytoma	1	Unknown	Wildtype	non-codel	Unmethylated
TCGA-DB-A64O	775	Dead	59	MALE	WHO II	Oligoastrocytoma	1	1	Wildtype	non-codel	Unmethylated
TCGA-S9-A7IY	715	Alive	39	MALE	WHO III	Oligoastrocytoma	1	1	Mutant	codel	Methylated
TCGA-HT-A615	515	Alive	38	FEMALE	WHO II	Oligodendroglioma	1	Unknown	Mutant	codel	Methylated
TCGA-TM-A7C4	1470	Alive	39	FEMALE	WHO II	Astrocytoma	0	Unknown	Mutant	non-codel	Methylated
TCGA-DU-A7TG	1351	Dead	40	MALE	WHO II	Oligodendroglioma	0	1	Mutant	non-codel	Methylated
TCGA-E1-5307	1762	Dead	62	FEMALE	WHO III	Astrocytoma	1	1	Mutant	non-codel	Methylated
TCGA-P5-A731	274	Alive	59	FEMALE	WHO II	Oligoastrocytoma	1	Unknown	Mutant	non-codel	Methylated
TCGA-HT-7693	533	Alive	51	FEMALE	WHO II	Oligodendroglioma	1	1	Mutant	non-codel	Methylated
TCGA-HW-7491	2078	Alive	35	MALE	WHO II	Oligodendroglioma	0	1	Mutant	codel	Unmethylated
TCGA-F6-A8O4	6	Alive	44	MALE	WHO II	Astrocytoma	Unknown	Unknown	Mutant	non-codel	Methylated
TCGA-E1-A7Z2	398	Dead	58	FEMALE	WHO II	Oligodendroglioma	1	1	Wildtype	non-codel	Unmethylated
TCGA-DB-A64R	955	Alive	24	FEMALE	WHO II	Oligodendroglioma	0	Unknown	Mutant	codel	Methylated
TCGA-S9-A6U2	908	Alive	48	FEMALE	WHO II	Oligodendroglioma	1	Unknown	Mutant	codel	Methylated
TCGA-FG-A4MY	721	Alive	44	FEMALE	WHO II	Oligoastrocytoma	1	Unknown	Mutant	non-codel	Methylated
TCGA-DB-A64Q	182	Alive	31	FEMALE	WHO II	Oligoastrocytoma	0	1	Mutant	codel	Methylated
TCGA-HW-A5KJ	962	Dead	68	MALE	WHO III	Oligodendroglioma	1	1	Mutant	codel	Methylated
TCGA-S9-A89Z	623	Alive	40	MALE	WHO III	Astrocytoma	1	1	Mutant	non-codel	Methylated
TCGA-DU-A5TR	908	Alive	51	MALE	WHO II	Oligoastrocytoma	1	1	Mutant	non-codel	Methylated
TCGA-DU-7298	576	Dead	38	FEMALE	WHO III	Astrocytoma	1	1	Mutant	non-codel	Methylated
TCGA-HT-8018	1152	Dead	40	FEMALE	WHO II	Oligoastrocytoma	1	Unknown	Mutant	non-codel	Methylated
TCGA-S9-A6WD	2289	Alive	58	MALE	WHO III	Oligodendroglioma	0	1	Mutant	codel	Methylated
TCGA-HW-7490	1387	Alive	41	MALE	WHO II	Astrocytoma	0	Unknown	Mutant	non-codel	Methylated
TCGA-TM-A84R	566	Alive	46	MALE	WHO II	Oligodendroglioma	0	Unknown	Mutant	codel	Methylated
TCGA-HT-7694	210	Alive	60	MALE	WHO III	Oligodendroglioma	1	Unknown	Mutant	codel	Methylated
TCGA-HT-7856	1189	Alive	35	MALE	WHO III	Oligodendroglioma	1	1	Mutant	codel	Methylated
TCGA-HT-A74H	74	Alive	62	MALE	WHO III	Astrocytoma	1	1	Wildtype	non-codel	Unmethylated
TCGA-S9-A7R7	3000	Alive	27	MALE	WHO II	Astrocytoma	1	1	Mutant	non-codel	Methylated
TCGA-DU-7302	1834	Alive	48	FEMALE	WHO III	Oligodendroglioma	0	1	Mutant	codel	Methylated
TCGA-HT-8013	1933	Dead	37	FEMALE	WHO II	Oligoastrocytoma	1	1	Mutant	non-codel	Methylated
TCGA-E1-A7YD	435	Dead	57	MALE	WHO III	Astrocytoma	1	1	Wildtype	non-codel	Unmethylated
TCGA-TM-A7CF	1989	Alive	41	FEMALE	WHO II	Astrocytoma	1	Unknown	Mutant	non-codel	Methylated
TCGA-TM-A7CA	1058	Alive	44	MALE	WHO II	Astrocytoma	0	Unknown	Mutant	non-codel	Methylated
TCGA-DU-7301	788	Dead	53	MALE	WHO II	Oligodendroglioma	1	1	Mutant	non-codel	Methylated
TCGA-RY-A845	596	Alive	40	FEMALE	WHO II	Oligoastrocytoma	0	Unknown	Mutant	non-codel	Methylated
TCGA-DB-A75L	342	Alive	36	FEMALE	WHO III	Astrocytoma	1	1	Mutant	non-codel	Methylated
TCGA-DU-A5TP	1012	Alive	33	MALE	WHO III	Astrocytoma	1	1	Mutant	non-codel	Methylated
TCGA-TM-A84L	1242	Dead	31	MALE	WHO II	Oligoastrocytoma	1	1	Mutant	non-codel	Methylated
TCGA-DH-5143	1401	Alive	30	MALE	WHO III	Oligoastrocytoma	1	1	Mutant	non-codel	Methylated
TCGA-DU-7006	349	Dead	60	FEMALE	WHO III	Astrocytoma	1	1	Wildtype	non-codel	Methylated
TCGA-DU-A5TT	743	Alive	70	MALE	WHO III	Oligodendroglioma	1	1	Wildtype	non-codel	Methylated
TCGA-TQ-A7RV	1868	Alive	27	MALE	WHO II	Astrocytoma	0	Unknown	Mutant	non-codel	Methylated
TCGA-HT-7855	585	Alive	39	MALE	WHO III	Astrocytoma	1	1	Mutant	non-codel	Methylated
TCGA-HW-7489	1262	Dead	38	MALE	WHO II	Oligoastrocytoma	0	Unknown	Mutant	non-codel	Methylated
TCGA-HT-7860	15	Alive	60	FEMALE	WHO III	Astrocytoma	Unknown	Unknown	Wildtype	non-codel	Methylated
TCGA-P5-A780	72	Alive	44	FEMALE	WHO III	Astrocytoma	1	Unknown	Mutant	non-codel	Methylated
TCGA-FG-5964	1588	Alive	62	MALE	WHO II	Oligodendroglioma	1	Unknown	Mutant	codel	Methylated
TCGA-HT-7601	153	Alive	30	FEMALE	WHO III	Astrocytoma	1	1	Mutant	non-codel	Methylated
TCGA-HT-7473	503	Alive	28	MALE	WHO II	Oligoastrocytoma	1	Unknown	Mutant	non-codel	Unmethylated
TCGA-CS-5393	1222	Alive	39	MALE	WHO III	Astrocytoma	1	1	Mutant	non-codel	Methylated
TCGA-QH-A6XC	508	Alive	48	MALE	WHO III	Astrocytoma	1	1	Wildtype	non-codel	Methylated
TCGA-VV-A86M	487	Alive	36	FEMALE	WHO III	Astrocytoma	1	1	Mutant	non-codel	Methylated
TCGA-S9-A7IS	241	Dead	33	FEMALE	WHO III	Astrocytoma	1	Unknown	Mutant	non-codel	Methylated
TCGA-HT-7695	442	Alive	29	FEMALE	WHO II	Oligodendroglioma	1	1	Mutant	codel	Methylated
TCGA-HT-8110	419	Alive	57	MALE	WHO III	Astrocytoma	1	Unknown	Wildtype	non-codel	Methylated
TCGA-E1-5319	2907	Dead	48	FEMALE	WHO II	Oligodendroglioma	1	1	Mutant	codel	Methylated
TCGA-HT-7854	1201	Alive	62	MALE	WHO II	Astrocytoma	1	Unknown	Wildtype	non-codel	Unmethylated
TCGA-VM-A8C9	1314	Alive	37	FEMALE	WHO II	Astrocytoma	0	Unknown	Wildtype	non-codel	Unmethylated
TCGA-HT-7692	90	Alive	43	MALE	WHO II	Oligoastrocytoma	1	Unknown	Mutant	codel	Methylated
TCGA-P5-A5EU	0	Alive	35	MALE	WHO III	Astrocytoma	0	Unknown	Mutant	non-codel	Unmethylated
TCGA-DU-8167	471	Alive	69	FEMALE	WHO II	Oligoastrocytoma	1	Unknown	Mutant	non-codel	Methylated
TCGA-S9-A6WM	604	Alive	59	FEMALE	WHO III	Astrocytoma	1	1	Wildtype	non-codel	Unmethylated
TCGA-DU-7014	3571	Dead	59	MALE	WHO II	Oligodendroglioma	1	Unknown	NA	non-codel	Methylated
TCGA-R8-A6ML	2860	Alive	52	MALE	WHO III	Oligodendroglioma	1	Unknown	Mutant	codel	Methylated
TCGA-DH-A7UR	1650	Alive	59	FEMALE	WHO III	Oligodendroglioma	1	1	Mutant	codel	Methylated
TCGA-P5-A5F6	39	Alive	26	MALE	WHO II	Oligodendroglioma	Unknown	Unknown	Wildtype	non-codel	Unmethylated
TCGA-HT-A4DV	792	Alive	51	FEMALE	WHO III	Oligodendroglioma	1	1	Mutant	codel	Methylated
TCGA-P5-A5F4	231	Alive	35	FEMALE	WHO III	Oligodendroglioma	1	1	Mutant	non-codel	Methylated
TCGA-FG-7634	467	Alive	28	MALE	WHO II	Oligodendroglioma	0	Unknown	Mutant	codel	Methylated
TCGA-KT-A7W1	438	Alive	45	FEMALE	WHO III	Astrocytoma	1	1	Wildtype	non-codel	Methylated
TCGA-DU-6406	512	Dead	59	FEMALE	WHO III	Oligoastrocytoma	1	1	Wildtype	non-codel	Unmethylated
TCGA-FG-5965	1120	Dead	39	FEMALE	WHO II	Oligoastrocytoma	1	1	Mutant	non-codel	Methylated
TCGA-HT-7690	3	Alive	29	MALE	WHO III	Oligoastrocytoma	0	Unknown	Mutant	non-codel	Methylated
TCGA-TQ-A7RM	1116	Alive	41	FEMALE	WHO III	Oligoastrocytoma	1	Unknown	Mutant	non-codel	Methylated
TCGA-DU-A76R	648	Dead	51	MALE	WHO III	Oligodendroglioma	1	1	Mutant	codel	Methylated
TCGA-S9-A6WE	4113	Alive	34	MALE	WHO II	Oligodendroglioma	0	1	Mutant	codel	Methylated
TCGA-QH-A6CS	588	Alive	41	MALE	WHO III	Astrocytoma	1	1	Wildtype	non-codel	Unmethylated
TCGA-P5-A5EY	72	Alive	21	MALE	WHO II	Astrocytoma	Unknown	Unknown	Wildtype	non-codel	Unmethylated
TCGA-DB-5279	1354	Alive	59	MALE	WHO II	Oligodendroglioma	1	Unknown	Mutant	codel	Methylated
TCGA-DB-5274	2289	Alive	37	FEMALE	WHO III	Oligoastrocytoma	1	1	Mutant	codel	Methylated
TCGA-DU-A5TU	796	Alive	62	FEMALE	WHO II	Astrocytoma	1	1	Mutant	non-codel	Methylated
TCGA-E1-A7YI	111	Dead	33	FEMALE	WHO III	Astrocytoma	0	Unknown	Mutant	non-codel	Methylated
TCGA-DU-A7T6	547	Dead	73	FEMALE	WHO III	Oligodendroglioma	Unknown	Unknown	Mutant	codel	Methylated
TCGA-HT-A5R9	2	Alive	48	FEMALE	WHO III	Oligodendroglioma	Unknown	Unknown	Mutant	codel	Methylated
TCGA-DU-8162	444	Dead	61	FEMALE	WHO III	Oligoastrocytoma	1	1	Wildtype	non-codel	Unmethylated
TCGA-S9-A7IX	819	Dead	57	MALE	WHO III	Astrocytoma	1	1	Wildtype	non-codel	Unmethylated
TCGA-DU-8163	629	Alive	29	MALE	WHO III	Oligoastrocytoma	1	1	Mutant	non-codel	Unmethylated
TCGA-DU-6392	6423	Alive	35	FEMALE	WHO III	Astrocytoma	1	1	Wildtype	non-codel	Unmethylated
TCGA-P5-A72Z	354	Alive	64	FEMALE	WHO III	Oligodendroglioma	1	1	Mutant	codel	Methylated
TCGA-S9-A6UA	178	Dead	66	MALE	WHO III	Astrocytoma	0	Unknown	Wildtype	non-codel	Methylated
TCGA-DB-5270	3733	Alive	38	FEMALE	WHO III	Oligoastrocytoma	1	1	Mutant	non-codel	Methylated
TCGA-DU-A7T8	4229	Dead	35	MALE	WHO III	Oligoastrocytoma	1	1	Mutant	non-codel	Methylated
TCGA-FG-6690	1294	Alive	70	MALE	WHO II	Oligodendroglioma	1	Unknown	Mutant	non-codel	Methylated
TCGA-HT-A5RA	832	Alive	65	FEMALE	WHO III	Astrocytoma	1	1	Wildtype	non-codel	Unmethylated
TCGA-HT-A61B	533	Alive	22	MALE	WHO III	Astrocytoma	1	1	Mutant	non-codel	Methylated
TCGA-S9-A7IZ	608	Alive	48	FEMALE	WHO III	Astrocytoma	1	1	Mutant	non-codel	Methylated
TCGA-P5-A77X	105	Alive	55	FEMALE	WHO II	Oligoastrocytoma	1	Unknown	Mutant	codel	Methylated
TCGA-DB-5273	2493	Alive	33	MALE	WHO III	Astrocytoma	1	1	Mutant	non-codel	Unmethylated
TCGA-RY-A83X	939	Alive	46	FEMALE	WHO II	Oligodendroglioma	0	Unknown	Mutant	codel	Methylated
TCGA-DU-6407	2875	Dead	35	FEMALE	WHO II	Oligodendroglioma	1	1	Mutant	non-codel	Methylated
TCGA-HT-8010	50	Alive	64	FEMALE	WHO II	Oligodendroglioma	0	Unknown	Mutant	codel	Methylated
TCGA-S9-A6TX	1245	Alive	46	MALE	WHO III	Oligodendroglioma	1	1	Mutant	codel	Methylated
TCGA-FG-5963	775	Dead	23	MALE	WHO III	Astrocytoma	1	1	Wildtype	non-codel	Unmethylated
TCGA-HT-7602	908	Alive	21	MALE	WHO II	Oligodendroglioma	0	Unknown	Mutant	non-codel	Methylated
TCGA-S9-A7J0	609	Alive	30	FEMALE	WHO III	Oligodendroglioma	1	1	Mutant	non-codel	Methylated
TCGA-HT-7877	4	Alive	20	FEMALE	WHO II	Oligodendroglioma	0	Unknown	Mutant	codel	Methylated
TCGA-TQ-A7RJ	1229	Alive	25	FEMALE	WHO II	Oligoastrocytoma	1	Unknown	Mutant	non-codel	Methylated
TCGA-DU-7299	1339	Dead	33	MALE	WHO III	Astrocytoma	1	1	Mutant	non-codel	Methylated
TCGA-HT-8108	76	Alive	26	FEMALE	WHO II	Oligodendroglioma	0	Unknown	Mutant	non-codel	Methylated
TCGA-FG-A87Q	174	Alive	61	FEMALE	WHO III	Astrocytoma	1	1	Wildtype	non-codel	Methylated
TCGA-P5-A5EZ	70	Alive	39	MALE	WHO III	Astrocytoma	Unknown	Unknown	Mutant	non-codel	Methylated
TCGA-DU-7309	84	Alive	41	FEMALE	WHO III	Oligodendroglioma	1	1	Mutant	non-codel	Methylated
TCGA-DU-A6S6	2893	Alive	35	FEMALE	WHO II	Oligoastrocytoma	0	1	Mutant	codel	Methylated
TCGA-DH-5141	968	Alive	32	MALE	WHO III	Oligodendroglioma	1	1	Mutant	codel	Methylated
TCGA-S9-A7R4	914	Alive	46	MALE	WHO III	Astrocytoma	1	1	Mutant	non-codel	Methylated
TCGA-KT-A74X	438	Alive	26	MALE	WHO III	Oligoastrocytoma	1	1	Mutant	codel	Methylated
TCGA-HT-7681	1359	Alive	29	FEMALE	WHO II	Oligoastrocytoma	0	Unknown	Mutant	codel	Methylated
TCGA-S9-A7R2	316	Dead	69	MALE	WHO III	Astrocytoma	1	Unknown	Wildtype	non-codel	Unmethylated
TCGA-P5-A72U	7	Alive	71	FEMALE	WHO III	Oligodendroglioma	0	Unknown	Wildtype	non-codel	Methylated
TCGA-QH-A6CW	414	Alive	43	MALE	WHO III	Oligoastrocytoma	0	Unknown	Mutant	non-codel	Methylated
TCGA-W9-A837	1553	Alive	47	MALE	WHO II	Oligodendroglioma	0	Unknown	Mutant	codel	Methylated
TCGA-HT-8015	3	Alive	21	MALE	WHO II	Astrocytoma	Unknown	Unknown	Wildtype	non-codel	Unmethylated
TCGA-DH-A669	919	Dead	70	MALE	WHO III	Oligodendroglioma	0	Unknown	Mutant	codel	Methylated
TCGA-HT-A614	82	Alive	47	MALE	WHO II	Oligoastrocytoma	Unknown	Unknown	Mutant	non-codel	Methylated
TCGA-DU-6394	682	Dead	53	MALE	WHO III	Oligodendroglioma	1	1	Mutant	codel	Methylated
TCGA-DU-7009	4695	Dead	32	FEMALE	WHO II	Oligodendroglioma	1	1	Mutant	codel	Methylated
TCGA-P5-A736	230	Alive	44	FEMALE	WHO III	Astrocytoma	1	Unknown	Mutant	non-codel	Methylated
TCGA-S9-A6WH	1173	Alive	73	FEMALE	WHO II	Oligoastrocytoma	1	Unknown	Mutant	codel	Methylated
TCGA-WH-A86K	405	Alive	65	MALE	WHO II	Astrocytoma	1	1	Mutant	non-codel	Methylated
TCGA-S9-A6WG	2602	Alive	31	MALE	WHO III	Astrocytoma	1	1	Mutant	non-codel	Methylated
TCGA-DU-5851	531	Alive	40	FEMALE	WHO III	Oligoastrocytoma	1	1	Mutant	non-codel	Unmethylated
TCGA-S9-A7R3	3013	Alive	28	FEMALE	WHO II	Astrocytoma	0	Unknown	Mutant	non-codel	Methylated
TCGA-DB-A4XA	573	Alive	30	MALE	WHO II	Oligoastrocytoma	1	Unknown	Mutant	codel	Methylated
TCGA-R8-A6MO	993	Alive	53	FEMALE	WHO II	Oligodendroglioma	0	Unknown	Mutant	codel	Methylated
TCGA-E1-A7YN	727	Dead	63	FEMALE	WHO III	Astrocytoma	1	1	Wildtype	non-codel	Methylated
TCGA-CS-6667	1469	Alive	39	FEMALE	WHO II	Astrocytoma	1	Unknown	Mutant	non-codel	Methylated
TCGA-E1-A7YM	648	Dead	63	MALE	WHO III	Astrocytoma	1	1	Wildtype	non-codel	Unmethylated
TCGA-E1-A7YL	492	Dead	46	MALE	WHO III	Astrocytoma	1	1	Wildtype	non-codel	Unmethylated
TCGA-HT-7480	2287	Alive	33	MALE	WHO II	Oligodendroglioma	1	1	Mutant	codel	Methylated
TCGA-CS-6670	1426	Alive	43	MALE	WHO III	Oligodendroglioma	Unknown	1	Mutant	codel	Methylated
TCGA-HT-A619	651	Alive	51	FEMALE	WHO III	Oligodendroglioma	0	1	Mutant	codel	Methylated
TCGA-TQ-A8XE	954	Dead	42	FEMALE	WHO II	Oligodendroglioma	0	Unknown	Mutant	non-codel	Methylated
TCGA-P5-A737	372	Alive	47	MALE	WHO II	Oligoastrocytoma	0	Unknown	Mutant	codel	Methylated
TCGA-DU-A7TB	1567	Alive	56	MALE	WHO II	Oligodendroglioma	1	1	Wildtype	non-codel	Unmethylated
TCGA-HT-A4DS	7	Alive	55	FEMALE	WHO III	Astrocytoma	Unknown	Unknown	Wildtype	non-codel	Unmethylated
TCGA-DU-7300	1886	Dead	53	FEMALE	WHO III	Oligodendroglioma	0	1	Mutant	codel	Methylated
TCGA-DU-7008	4752	Alive	41	FEMALE	WHO II	Oligodendroglioma	1	1	Mutant	non-codel	Methylated
TCGA-DH-A66D	846	Alive	43	FEMALE	WHO III	Astrocytoma	1	1	Mutant	non-codel	Methylated
TCGA-QH-A65X	482	Alive	28	FEMALE	WHO III	Oligoastrocytoma	1	1	Mutant	codel	Methylated
TCGA-HW-8320	1217	Alive	36	MALE	WHO III	Astrocytoma	1	1	Mutant	non-codel	Methylated
TCGA-S9-A7QZ	826	Alive	41	MALE	WHO II	Oligodendroglioma	0	Unknown	Mutant	codel	Methylated
TCGA-R8-A73M	1806	Alive	48	FEMALE	WHO II	Oligodendroglioma	0	Unknown	Mutant	codel	Methylated
TCGA-QH-A6CU	451	Alive	52	FEMALE	WHO III	Oligodendroglioma	1	1	Mutant	codel	Methylated
TCGA-HT-8105	190	Alive	54	MALE	WHO III	Oligodendroglioma	1	Unknown	Mutant	codel	Methylated
TCGA-VM-A8CE	1191	Alive	25	MALE	WHO II	Oligodendroglioma	1	1	Mutant	codel	Methylated
TCGA-S9-A6TU	2650	Alive	38	MALE	WHO II	Astrocytoma	0	Unknown	Mutant	non-codel	Methylated
TCGA-HT-7688	964	Alive	59	MALE	WHO III	Oligodendroglioma	1	1	Mutant	non-codel	Methylated
TCGA-HT-8011	494	Alive	55	MALE	WHO III	Astrocytoma	1	1	Wildtype	non-codel	Unmethylated
TCGA-TM-A84H	926	Alive	44	FEMALE	WHO III	Oligoastrocytoma	1	Unknown	Mutant	non-codel	Methylated
TCGA-DU-6405	605	Dead	51	FEMALE	WHO III	Astrocytoma	1	1	Wildtype	non-codel	Methylated
TCGA-CS-6186	538	Dead	58	MALE	WHO III	Oligoastrocytoma	1	1	Wildtype	non-codel	Unmethylated
TCGA-FG-A87N	567	Alive	37	FEMALE	WHO III	Astrocytoma	1	1	Mutant	non-codel	Methylated
TCGA-HT-7471	4	Alive	37	FEMALE	WHO III	Oligodendroglioma	Unknown	Unknown	Mutant	codel	Methylated
TCGA-FG-A70Z	328	Alive	53	FEMALE	WHO III	Oligoastrocytoma	1	1	Wildtype	non-codel	Methylated
TCGA-HW-8321	1294	Alive	31	MALE	WHO III	Astrocytoma	1	1	Mutant	non-codel	Methylated
TCGA-P5-A5F1	179	Alive	30	MALE	WHO II	Astrocytoma	Unknown	Unknown	Mutant	non-codel	Unmethylated
TCGA-P5-A5EV	7	Alive	39	MALE	WHO II	Astrocytoma	Unknown	Unknown	Mutant	non-codel	Methylated
TCGA-TQ-A7RW	821	Dead	32	MALE	WHO II	Oligodendroglioma	1	Unknown	Mutant	non-codel	Methylated
TCGA-HT-8114	1040	Alive	36	MALE	WHO III	Oligoastrocytoma	1	1	Mutant	non-codel	Methylated
TCGA-HT-7478	194	Alive	36	MALE	WHO II	Astrocytoma	1	Unknown	Mutant	non-codel	Unmethylated
TCGA-DH-A7UT	531	Dead	30	MALE	WHO III	Astrocytoma	1	1	Mutant	non-codel	Methylated
TCGA-HT-7604	3725	Alive	50	MALE	WHO II	Astrocytoma	1	1	Mutant	non-codel	Methylated
TCGA-DU-5855	207	Alive	49	FEMALE	WHO III	Oligoastrocytoma	1	1	Mutant	non-codel	Methylated
TCGA-DH-A66B	1279	Alive	52	MALE	WHO III	Astrocytoma	1	1	Mutant	non-codel	Methylated
TCGA-DU-5847	548	Alive	34	FEMALE	WHO III	Astrocytoma	1	1	Wildtype	non-codel	Methylated
TCGA-DB-A4XC	1421	Alive	26	MALE	WHO II	Oligoastrocytoma	1	Unknown	Mutant	non-codel	Methylated
TCGA-DU-8165	582	Alive	60	FEMALE	WHO III	Oligodendroglioma	1	1	Wildtype	non-codel	Unmethylated
TCGA-QH-A6CX	372	Dead	66	MALE	WHO II	Astrocytoma	1	Unknown	Wildtype	non-codel	Unmethylated
TCGA-S9-A7QX	564	Alive	36	FEMALE	WHO III	Astrocytoma	1	1	Mutant	non-codel	Methylated
TCGA-HT-7874	1130	Alive	41	FEMALE	WHO III	Oligodendroglioma	1	1	Mutant	codel	Methylated
TCGA-DH-A66G	523	Alive	49	FEMALE	WHO III	Oligodendroglioma	1	1	Mutant	non-codel	Methylated
TCGA-HT-8111	7	Alive	32	MALE	WHO III	Oligoastrocytoma	0	Unknown	Mutant	non-codel	Methylated
TCGA-DU-A6S3	656	Alive	60	MALE	WHO II	Oligodendroglioma	0	Unknown	Mutant	codel	Methylated
TCGA-DU-7290	315	Dead	45	FEMALE	WHO III	Astrocytoma	0	Unknown	Wildtype	non-codel	Unmethylated
TCGA-HT-7469	351	Dead	30	MALE	WHO III	Oligodendroglioma	1	1	Wildtype	non-codel	Methylated
TCGA-QH-A6X5	497	Alive	58	FEMALE	WHO II	Oligoastrocytoma	0	Unknown	Mutant	codel	Methylated
TCGA-DU-6404	4068	Dead	24	FEMALE	WHO III	Oligodendroglioma	1	1	Wildtype	non-codel	Unmethylated
TCGA-CS-6188	814	Dead	48	MALE	WHO III	Astrocytoma	1	1	Wildtype	non-codel	Unmethylated
TCGA-HT-7485	122	Alive	42	MALE	WHO II	Astrocytoma	0	Unknown	Mutant	non-codel	Methylated
TCGA-QH-A870	395	Alive	38	FEMALE	WHO III	Oligoastrocytoma	0	1	Mutant	non-codel	Methylated
TCGA-HT-A61C	537	Dead	66	MALE	WHO III	Oligodendroglioma	1	1	Wildtype	non-codel	Unmethylated
TCGA-P5-A5F2	242	Alive	36	FEMALE	WHO II	Astrocytoma	0	1	Mutant	non-codel	Methylated
TCGA-CS-5396	1631	Alive	53	FEMALE	WHO III	Oligodendroglioma	1	1	Mutant	codel	Methylated
TCGA-DU-6395	1491	Dead	31	MALE	WHO II	Oligoastrocytoma	1	1	Mutant	non-codel	Methylated
TCGA-TM-A84J	735	Alive	63	MALE	WHO III	Oligodendroglioma	1	1	Wildtype	non-codel	Unmethylated
TCGA-HT-7687	3	Alive	74	MALE	WHO III	Oligodendroglioma	Unknown	Unknown	Mutant	codel	Methylated
TCGA-S9-A6U9	2918	Alive	36	MALE	WHO III	Astrocytoma	1	Unknown	Mutant	non-codel	Methylated
TCGA-S9-A6WO	566	Alive	29	MALE	WHO II	Astrocytoma	1	Unknown	Mutant	non-codel	Methylated
TCGA-CS-6668	1519	Alive	57	FEMALE	WHO II	Oligodendroglioma	0	1	Mutant	codel	Methylated
TCGA-HW-A5KK	388	Dead	64	MALE	WHO III	Astrocytoma	1	1	Wildtype	non-codel	Methylated
TCGA-WY-A859	1213	Alive	34	FEMALE	WHO II	Astrocytoma	1	Unknown	Mutant	non-codel	Methylated
TCGA-DH-A7UU	417	Alive	43	MALE	WHO III	Astrocytoma	1	1	Mutant	non-codel	Methylated
TCGA-S9-A7QW	458	Alive	54	FEMALE	WHO III	Astrocytoma	1	1	Mutant	non-codel	Methylated
TCGA-QH-A65V	384	Alive	43	FEMALE	WHO II	Oligodendroglioma	0	1	Mutant	codel	Methylated
TCGA-WY-A85E	633	Alive	48	FEMALE	WHO II	Oligoastrocytoma	0	Unknown	Mutant	non-codel	Methylated
TCGA-DU-7012	199	Dead	74	FEMALE	WHO III	Astrocytoma	1	Unknown	Wildtype	non-codel	Methylated
TCGA-CS-6669	1494	Alive	26	FEMALE	WHO II	Oligodendroglioma	0	1	Wildtype	non-codel	Unmethylated
TCGA-TQ-A7RI	62	Alive	37	FEMALE	WHO II	Oligodendroglioma	0	Unknown	Mutant	codel	Methylated
TCGA-HT-8012	286	Alive	30	FEMALE	WHO II	Oligodendroglioma	0	Unknown	Mutant	codel	Methylated
TCGA-F6-A8O3	7	Alive	34	MALE	WHO II	Oligodendroglioma	Unknown	Unknown	Mutant	codel	Methylated
TCGA-TQ-A7RO	949	Alive	29	MALE	WHO II	Oligoastrocytoma	0	Unknown	Mutant	codel	Methylated
TCGA-S9-A7J1	249	Alive	43	MALE	WHO II	Oligodendroglioma	0	Unknown	Mutant	codel	Methylated
TCGA-TM-A84B	758	Dead	40	MALE	WHO III	Astrocytoma	0	1	Wildtype	non-codel	Unmethylated
TCGA-DB-A64X	563	Alive	56	FEMALE	WHO III	Astrocytoma	1	1	Mutant	non-codel	Methylated
TCGA-FG-A713	622	Alive	74	FEMALE	WHO II	Oligoastrocytoma	1	Unknown	Mutant	codel	Methylated
TCGA-E1-A7YH	2835	Dead	47	FEMALE	WHO III	Astrocytoma	1	1	Mutant	non-codel	Methylated
TCGA-DB-A64S	835	Alive	20	MALE	WHO II	Oligoastrocytoma	0	Unknown	Mutant	non-codel	Unmethylated
TCGA-DU-6408	3470	Dead	23	FEMALE	WHO III	Oligodendroglioma	1	1	Mutant	non-codel	Methylated
TCGA-QH-A6X4	442	Alive	47	MALE	WHO III	Oligoastrocytoma	1	1	Mutant	codel	Methylated
TCGA-DU-7019	800	Alive	39	MALE	Discrepancy	Oligoastrocytoma	1	1	Mutant	non-codel	Methylated
TCGA-DU-A76K	347	Dead	87	MALE	WHO II	Oligodendroglioma	1	1	Wildtype	non-codel	Unmethylated
TCGA-R8-A6MK	2702	Alive	40	MALE	WHO II	Oligodendroglioma	0	Unknown	Mutant	codel	Methylated
TCGA-HT-7879	112	Alive	31	MALE	WHO III	Oligoastrocytoma	1	1	Mutant	non-codel	Methylated
TCGA-S9-A6WP	567	Alive	42	MALE	WHO III	Oligoastrocytoma	0	1	Mutant	codel	Methylated
TCGA-HT-8019	1004	Alive	34	FEMALE	WHO III	Oligodendroglioma	1	Unknown	Wildtype	non-codel	Unmethylated
TCGA-QH-A6CY	408	Alive	38	MALE	WHO III	Oligoastrocytoma	1	1	Mutant	codel	Methylated
TCGA-VW-A7QS	706	Alive	35	FEMALE	WHO III	Oligodendroglioma	0	1	Mutant	codel	Methylated
TCGA-HT-7605	139	Alive	38	MALE	WHO II	Oligodendroglioma	0	Unknown	Mutant	codel	Methylated
TCGA-S9-A6WN	805	Alive	38	FEMALE	WHO III	Astrocytoma	1	1	Mutant	codel	Methylated
TCGA-CS-6290	1137	Dead	31	MALE	WHO III	Astrocytoma	1	1	Mutant	non-codel	Methylated
TCGA-DB-A4XE	1139	Alive	27	FEMALE	WHO III	Oligoastrocytoma	1	Unknown	Mutant	non-codel	Methylated
TCGA-TQ-A7RQ	795	Alive	38	FEMALE	WHO II	Oligodendroglioma	0	Unknown	Mutant	codel	Methylated
TCGA-HT-7606	526	Alive	30	FEMALE	WHO II	Astrocytoma	1	1	Mutant	non-codel	Unmethylated
TCGA-HT-7882	113	Dead	66	MALE	WHO III	Oligodendroglioma	0	Unknown	Wildtype	non-codel	Methylated
TCGA-DU-A6S8	678	Alive	74	FEMALE	WHO III	Oligodendroglioma	0	1	Mutant	codel	Methylated
TCGA-CS-4942	1335	Dead	44	FEMALE	WHO III	Astrocytoma	1	1	Mutant	non-codel	Unmethylated
TCGA-FG-A4MU	326	Alive	58	MALE	WHO III	Oligoastrocytoma	Unknown	Unknown	Wildtype	non-codel	Methylated
TCGA-HT-7902	956	Alive	30	FEMALE	WHO II	Oligoastrocytoma	0	Unknown	Mutant	non-codel	Methylated
TCGA-HT-A5RC	162	Dead	70	FEMALE	WHO III	Astrocytoma	1	1	Wildtype	non-codel	Unmethylated
TCGA-WY-A85B	1393	Alive	24	MALE	WHO II	Astrocytoma	0	Unknown	Mutant	non-codel	Methylated
TCGA-DU-6410	242	Alive	56	MALE	WHO III	Oligodendroglioma	0	1	Mutant	codel	Methylated
TCGA-FG-A711	1481	Dead	33	FEMALE	WHO II	Oligodendroglioma	1	1	Mutant	non-codel	Unmethylated
TCGA-E1-A7Z3	2235	Dead	31	FEMALE	WHO II	Astrocytoma	1	1	Mutant	non-codel	Methylated
TCGA-DB-A75K	368	Alive	55	FEMALE	WHO III	Oligoastrocytoma	1	1	Mutant	codel	Methylated
TCGA-CS-4938	3574	Alive	31	FEMALE	WHO II	Astrocytoma	0	Unknown	Mutant	non-codel	Unmethylated
TCGA-DH-A7US	706	Alive	50	MALE	WHO II	Oligodendroglioma	0	Unknown	Mutant	codel	Methylated
TCGA-DU-A7TJ	17	Alive	55	MALE	WHO III	Astrocytoma	Unknown	Unknown	Wildtype	non-codel	Methylated
TCGA-P5-A733	414	Alive	52	FEMALE	WHO II	Astrocytoma	1	1	Mutant	non-codel	Methylated
TCGA-RY-A83Y	166	Alive	45	MALE	WHO II	Oligodendroglioma	0	Unknown	Mutant	codel	Methylated
TCGA-DU-5874	461	Alive	62	FEMALE	WHO II	Oligodendroglioma	0	1	Mutant	codel	Methylated
TCGA-HW-7487	1382	Alive	39	MALE	WHO II	Oligodendroglioma	1	1	Mutant	codel	Methylated
TCGA-HW-8322	758	Alive	39	MALE	WHO II	Oligodendroglioma	0	1	Mutant	codel	Methylated
TCGA-FG-A70Y	868	Alive	20	FEMALE	WHO II	Oligodendroglioma	1	1	Mutant	non-codel	Methylated
TCGA-E1-A7YO	2282	Dead	45	MALE	WHO III	Oligodendroglioma	0	0	Mutant	codel	Methylated
TCGA-E1-5302	1525	Dead	41	MALE	WHO III	Astrocytoma	1	1	Mutant	non-codel	Methylated
TCGA-HT-7873	718	Alive	29	MALE	WHO II	Oligoastrocytoma	1	Unknown	Mutant	non-codel	Methylated
TCGA-DU-5870	5546	Alive	34	FEMALE	WHO II	Oligodendroglioma	1	1	Mutant	codel	Methylated
TCGA-HT-7858	1540	Alive	28	MALE	WHO II	Astrocytoma	1	Unknown	Mutant	non-codel	Methylated
TCGA-DU-5852	205	Dead	61	FEMALE	WHO III	Oligoastrocytoma	1	1	Wildtype	non-codel	Methylated
TCGA-FG-7641	627	Alive	31	MALE	WHO II	Oligodendroglioma	0	Unknown	Mutant	codel	Methylated
TCGA-QH-A65Z	427	Alive	54	MALE	WHO II	Oligodendroglioma	1	1	Mutant	codel	Methylated
TCGA-HW-7493	2107	Alive	40	FEMALE	WHO II	Astrocytoma	1	Unknown	NA	non-codel	Methylated
TCGA-TQ-A7RF	650	Alive	27	FEMALE	WHO III	Oligodendroglioma	1	Unknown	Mutant	non-codel	Unmethylated
TCGA-HT-7689	455	Alive	58	FEMALE	WHO II	Oligodendroglioma	1	1	Mutant	non-codel	Methylated
TCGA-HT-7607	96	Dead	61	FEMALE	WHO II	Astrocytoma	0	Unknown	Mutant	codel	Methylated
TCGA-DU-7011	3200	Dead	25	MALE	WHO II	Oligoastrocytoma	1	Unknown	Mutant	non-codel	Unmethylated
TCGA-FG-6691	1257	Alive	23	FEMALE	WHO II	Astrocytoma	1	1	Mutant	non-codel	Unmethylated
TCGA-HT-7676	5	Alive	26	MALE	WHO II	Oligodendroglioma	Unknown	Unknown	Mutant	non-codel	Unmethylated
TCGA-HT-A5R5	4	Alive	33	FEMALE	WHO II	Oligodendroglioma	Unknown	Unknown	Mutant	non-codel	Methylated
TCGA-FG-A4MX	569	Alive	47	MALE	WHO II	Astrocytoma	1	Unknown	Mutant	non-codel	Methylated
TCGA-FG-6689	454	Alive	30	MALE	WHO II	Astrocytoma	1	1	Mutant	non-codel	Methylated
TCGA-DU-6402	214	Dead	52	MALE	WHO III	Astrocytoma	1	1	Wildtype	non-codel	Unmethylated
TCGA-DU-A6S7	638	Alive	27	FEMALE	WHO III	Astrocytoma	1	1	Mutant	non-codel	Methylated
TCGA-QH-A6X8	509	Alive	56	FEMALE	WHO III	Oligodendroglioma	1	1	Mutant	codel	Methylated
TCGA-S9-A7R8	961	Dead	44	FEMALE	WHO III	Astrocytoma	1	1	Mutant	non-codel	Methylated
TCGA-14-1829	218	Alive	57	MALE	WHO IV	Untreated primary GBM	1	1	Wildtype	non-codel	Unmethylated
TCGA-06-0208	256	Dead	52	FEMALE	WHO IV	Untreated primary GBM	1	1	Wildtype	non-codel	NA
TCGA-02-0070	762	Alive	70	MALE	WHO IV	Untreated primary GBM	1	1	Wildtype	non-codel	NA
TCGA-28-5211	358	Alive	42	MALE	WHO IV	Untreated primary GBM	1	1	Wildtype	non-codel	Unmethylated
TCGA-02-0039	320	Dead	54	MALE	WHO IV	Untreated primary GBM	1	Unknown	Wildtype	non-codel	NA
TCGA-19-5960	455	Dead	56	MALE	WHO IV	Untreated primary GBM	1	1	Wildtype	non-codel	Unmethylated
TCGA-06-0240	621	Dead	57	MALE	WHO IV	GBM	1	1	Wildtype	non-codel	NA
TCGA-32-1986	386	Dead	68	MALE	WHO IV	Untreated primary GBM	1	1	Wildtype	non-codel	Unmethylated
TCGA-08-0380	454	Dead	74	FEMALE	WHO IV	Untreated primary GBM	1	1	Wildtype	non-codel	NA
TCGA-06-5418	83	Dead	75	FEMALE	WHO IV	Untreated primary GBM	0	Unknown	Wildtype	non-codel	Unmethylated
TCGA-08-0520	327	Dead	70	MALE	WHO IV	Untreated primary GBM	1	1	NA	non-codel	NA
TCGA-02-0052	383	Dead	49	MALE	WHO IV	Untreated primary GBM	1	1	Wildtype	non-codel	Unmethylated
TCGA-12-1092	661	Dead	58	MALE	WHO IV	Untreated primary GBM	1	1	Wildtype	non-codel	Methylated
TCGA-02-0071	167	Dead	53	MALE	WHO IV	Untreated primary GBM	1	Unknown	Wildtype	non-codel	Unmethylated
TCGA-12-0778	454	Dead	53	MALE	WHO IV	Untreated primary GBM	1	1	Wildtype	non-codel	NA
TCGA-12-1597	675	Dead	62	FEMALE	WHO IV	Untreated primary GBM	1	1	Wildtype	NA	Unmethylated
TCGA-06-6701	151	Alive	60	MALE	WHO IV	Untreated primary GBM	1	1	Mutant	non-codel	Methylated
TCGA-02-0085	1561	Dead	63	FEMALE	WHO IV	Untreated primary GBM	1	1	Wildtype	non-codel	Methylated
TCGA-15-1446	581	Alive	55	MALE	WHO IV	Untreated primary GBM	1	1	Wildtype	non-codel	Unmethylated
TCGA-12-1098	121	Dead	75	FEMALE	WHO IV	Untreated primary GBM	1	1	NA	non-codel	Unmethylated
TCGA-4W-AA9S	44	Alive	69	MALE	WHO IV	GBM	1	1	Wildtype	non-codel	Methylated
TCGA-32-4213	604	Alive	47	FEMALE	WHO IV	Untreated primary GBM	1	1	Wildtype	non-codel	Methylated
TCGA-14-0871	880	Dead	74	FEMALE	WHO IV	Untreated primary GBM	1	0	Wildtype	non-codel	Unmethylated
TCGA-41-3393	135	Dead	81	FEMALE	WHO IV	Untreated primary GBM	1	1	Wildtype	non-codel	Unmethylated
TCGA-26-1799	285	Dead	68	MALE	WHO IV	Untreated primary GBM	1	1	Wildtype	non-codel	Unmethylated
TCGA-74-6581	250	Alive	77	MALE	WHO IV	Untreated primary GBM	1	1	NA	non-codel	Unmethylated
TCGA-81-5910	49	Dead	64	MALE	WHO IV	Untreated primary GBM	0	Unknown	Wildtype	non-codel	Unmethylated
TCGA-12-0657	3	Dead	69	MALE	WHO IV	Untreated primary GBM	0	Unknown	Wildtype	non-codel	NA
TCGA-06-6391	45	Dead	44	FEMALE	WHO IV	Untreated primary GBM	0	Unknown	Wildtype	non-codel	Unmethylated
TCGA-14-0790	419	Dead	64	FEMALE	WHO IV	Untreated primary GBM	1	1	Wildtype	non-codel	Methylated
TCGA-76-6193	82	Dead	78	MALE	WHO IV	Untreated primary GBM	1	1	Wildtype	non-codel	Unmethylated
TCGA-12-3651	386	Dead	77	MALE	WHO IV	Untreated primary GBM	1	1	Wildtype	non-codel	Methylated
TCGA-06-0165	324	Dead	52	MALE	WHO IV	GBM	1	1	Wildtype	non-codel	NA
TCGA-06-0881	504	Dead	50	MALE	WHO IV	Untreated primary GBM	1	1	Wildtype	non-codel	Unmethylated
TCGA-08-0347	782	Dead	50	MALE	WHO IV	Untreated primary GBM	1	1	Wildtype	non-codel	NA
TCGA-19-5956	684	Dead	53	FEMALE	WHO IV	Untreated primary GBM	1	1	NA	non-codel	Unmethylated
TCGA-32-4719	330	Dead	73	MALE	WHO IV	Untreated primary GBM	1	1	Wildtype	non-codel	Unmethylated
TCGA-32-2616	224	Dead	48	FEMALE	WHO IV	Untreated primary GBM	1	1	NA	non-codel	Methylated
TCGA-28-2509	145	Alive	77	FEMALE	WHO IV	Untreated primary GBM	1	1	Wildtype	non-codel	Methylated
TCGA-14-3476	12	Dead	74	MALE	WHO IV	Untreated primary GBM	0	0	Wildtype	NA	Unmethylated
TCGA-19-0962	20	Dead	77	FEMALE	WHO IV	Untreated primary GBM	0	Unknown	NA	non-codel	Methylated
TCGA-06-2558	380	Dead	75	FEMALE	WHO IV	Untreated primary GBM	1	Unknown	Wildtype	non-codel	Unmethylated
TCGA-16-1056	426	Dead	55	MALE	WHO IV	Untreated primary GBM	1	Unknown	NA	non-codel	Unmethylated
TCGA-27-1831	505	Dead	66	MALE	WHO IV	Untreated primary GBM	1	1	Wildtype	non-codel	Unmethylated
TCGA-19-4065	214	Alive	36	MALE	WHO IV	Untreated primary GBM	1	1	NA	non-codel	Unmethylated
TCGA-14-0866	801	Dead	55	MALE	WHO IV	Untreated primary GBM	1	1	NA	non-codel	Methylated
TCGA-14-1455	28	Dead	61	MALE	WHO IV	Untreated primary GBM	0	1	Wildtype	non-codel	Methylated
TCGA-14-1453	35	Dead	69	MALE	WHO IV	Untreated primary GBM	0	0	Wildtype	non-codel	Unmethylated
TCGA-16-0850	498	Dead	52	FEMALE	WHO IV	Untreated primary GBM	1	Unknown	Mutant	non-codel	Unmethylated
TCGA-02-0060	183	Dead	66	FEMALE	WHO IV	Untreated primary GBM	1	1	Wildtype	non-codel	Methylated
TCGA-76-4928	94	Dead	85	FEMALE	WHO IV	Untreated primary GBM	1	1	Wildtype	non-codel	Methylated
TCGA-76-6657	153	Dead	74	MALE	WHO IV	Untreated primary GBM	1	1	Wildtype	non-codel	Methylated
TCGA-02-0051	459	Dead	43	MALE	WHO IV	Untreated primary GBM	1	Unknown	NA	non-codel	NA
TCGA-02-0074	310	Dead	68	FEMALE	WHO IV	Untreated primary GBM	1	1	Wildtype	non-codel	Unmethylated
TCGA-02-0001	358	Dead	44	FEMALE	WHO IV	Untreated primary GBM	1	1	Wildtype	non-codel	Unmethylated
TCGA-28-1757	4	Alive	71	MALE	WHO IV	Untreated primary GBM	Unknown	Unknown	Wildtype	non-codel	Methylated
TCGA-19-1789	99	Dead	69	FEMALE	WHO IV	Untreated primary GBM	1	1	Wildtype	non-codel	Methylated
TCGA-28-2502	20	Alive	65	MALE	WHO IV	Untreated primary GBM	1	Unknown	Wildtype	non-codel	Unmethylated
TCGA-02-0079	829	Dead	57	MALE	WHO IV	Untreated primary GBM	1	Unknown	Wildtype	non-codel	NA
TCGA-14-1827	179	Dead	51	MALE	WHO IV	Untreated primary GBM	0	1	Wildtype	non-codel	Methylated
TCGA-02-2483	466	Alive	43	MALE	WHO IV	Untreated primary GBM	1	1	Mutant	non-codel	Methylated
TCGA-19-1392	111	Dead	72	FEMALE	WHO IV	Untreated primary GBM	0	Unknown	NA	non-codel	Methylated
TCGA-06-0169	100	Dead	68	MALE	WHO IV	Untreated primary GBM	1	1	Wildtype	non-codel	Unmethylated
TCGA-02-0026	748	Dead	27	MALE	WHO IV	Untreated primary GBM	1	1	Mutant	non-codel	NA
TCGA-26-A7UX	588	Alive	47	MALE	WHO IV	GBM	1	1	Wildtype	non-codel	Methylated
TCGA-32-4210	113	Dead	73	MALE	WHO IV	Untreated primary GBM	Unknown	Unknown	Wildtype	non-codel	Unmethylated
TCGA-08-0353	256	Dead	58	MALE	WHO IV	Untreated primary GBM	1	1	Wildtype	non-codel	NA
TCGA-12-0656	2883	Dead	48	FEMALE	WHO IV	Untreated primary GBM	1	1	Wildtype	non-codel	NA
TCGA-06-2565	506	Dead	59	MALE	WHO IV	Untreated primary GBM	1	1	Wildtype	non-codel	Methylated
TCGA-02-0034	430	Dead	60	MALE	WHO IV	Untreated primary GBM	1	1	Wildtype	non-codel	Unmethylated
TCGA-06-0221	603	Dead	31	MALE	WHO IV	Untreated primary GBM	1	1	Mutant	non-codel	NA
TCGA-28-1756	86	Alive	78	MALE	WHO IV	Untreated primary GBM	1	1	NA	non-codel	Methylated
TCGA-08-0386	548	Dead	74	MALE	WHO IV	Untreated primary GBM	1	1	Wildtype	non-codel	NA
TCGA-19-2620	148	Dead	70	MALE	WHO IV	Untreated primary GBM	1	1	Wildtype	non-codel	Methylated
TCGA-08-0531	230	Dead	64	MALE	WHO IV	Untreated primary GBM	1	1	NA	non-codel	NA
TCGA-28-5208	544	Dead	52	MALE	WHO IV	Untreated primary GBM	1	1	Wildtype	non-codel	Methylated
TCGA-06-2566	182	Dead	23	FEMALE	WHO IV	Untreated primary GBM	1	1	Wildtype	non-codel	Unmethylated
TCGA-19-1787	385	Dead	48	MALE	WHO IV	Untreated primary GBM	1	1	NA	non-codel	Methylated
TCGA-14-1454	918	Dead	54	FEMALE	WHO IV	Untreated primary GBM	1	1	NA	non-codel	Unmethylated
TCGA-06-5412	138	Dead	78	FEMALE	WHO IV	Untreated primary GBM	1	1	Wildtype	non-codel	Methylated
TCGA-32-2495	457	Dead	59	FEMALE	WHO IV	Treated primary GBM	1	1	Wildtype	non-codel	Unmethylated
TCGA-02-0430	321	Dead	67	FEMALE	WHO IV	Untreated primary GBM	1	Unknown	NA	non-codel	NA
TCGA-19-1389	141	Dead	51	MALE	WHO IV	Untreated primary GBM	1	1	Wildtype	non-codel	Unmethylated
TCGA-76-6285	254	Dead	64	FEMALE	WHO IV	Untreated primary GBM	0	1	Wildtype	non-codel	Unmethylated
TCGA-26-5134	167	Alive	74	MALE	WHO IV	Untreated primary GBM	1	Unknown	Wildtype	non-codel	Unmethylated
TCGA-14-0783	189	Dead	36	FEMALE	WHO IV	Untreated primary GBM	1	1	NA	non-codel	Methylated
TCGA-06-A6S0	95	Dead	79	MALE	WHO IV	GBM	1	Unknown	Wildtype	non-codel	Unmethylated
TCGA-06-2561	537	Dead	53	FEMALE	WHO IV	Untreated primary GBM	1	1	Wildtype	non-codel	Unmethylated
TCGA-76-6192	100	Dead	74	MALE	WHO IV	Untreated primary GBM	1	1	Wildtype	non-codel	Unmethylated
TCGA-06-1805	1031	Alive	28	FEMALE	WHO IV	Untreated primary GBM	1	1	Mutant	non-codel	Unmethylated
TCGA-12-1089	177	Dead	64	MALE	WHO IV	Untreated primary GBM	1	1	Wildtype	non-codel	Unmethylated
TCGA-14-4157	104	Alive	40	MALE	WHO IV	Untreated primary GBM	1	1	Mutant	non-codel	Methylated
TCGA-32-4209	618	Dead	40	MALE	WHO IV	Treated primary GBM	1	1	Wildtype	NA	Methylated
TCGA-06-0174	98	Dead	54	MALE	WHO IV	Untreated primary GBM	1	1	Wildtype	non-codel	NA
TCGA-27-2524	231	Dead	56	MALE	WHO IV	Untreated primary GBM	1	1	Wildtype	non-codel	Unmethylated
TCGA-02-0027	370	Dead	33	FEMALE	WHO IV	Untreated primary GBM	1	1	Wildtype	non-codel	Unmethylated
TCGA-06-0119	82	Dead	81	FEMALE	WHO IV	GBM	0	1	Wildtype	non-codel	Methylated
TCGA-32-5222	585	Dead	66	MALE	WHO IV	Untreated primary GBM	1	1	Wildtype	non-codel	Methylated
TCGA-41-5651	460	Dead	59	FEMALE	WHO IV	Untreated primary GBM	1	1	Wildtype	non-codel	Methylated
TCGA-06-0140	6	Dead	86	MALE	WHO IV	GBM	0	Unknown	Wildtype	non-codel	Unmethylated
TCGA-06-0158	329	Dead	73	MALE	WHO IV	Untreated primary GBM	1	1	Wildtype	non-codel	NA
TCGA-02-0014	2512	Dead	25	MALE	WHO IV	Untreated primary GBM	1	1	Mutant	non-codel	Unmethylated
TCGA-19-4068	137	Alive	68	FEMALE	WHO IV	Untreated primary GBM	1	1	Wildtype	NA	Unmethylated
TCGA-76-4935	1121	Dead	52	FEMALE	WHO IV	Untreated primary GBM	1	1	Wildtype	non-codel	Methylated
TCGA-81-5911	539	Alive	33	MALE	WHO IV	Untreated primary GBM	1	1	Wildtype	non-codel	Unmethylated
TCGA-76-6661	727	Dead	54	MALE	WHO IV	Untreated primary GBM	1	1	Wildtype	non-codel	Unmethylated
TCGA-06-0138	737	Dead	43	MALE	WHO IV	Untreated primary GBM	1	Unknown	Wildtype	non-codel	NA
TCGA-02-0086	268	Dead	45	FEMALE	WHO IV	Untreated primary GBM	1	1	Wildtype	non-codel	Unmethylated
TCGA-14-2554	532	Dead	52	FEMALE	WHO IV	Untreated primary GBM	1	0	Wildtype	non-codel	Unmethylated
TCGA-28-5204	454	Dead	72	MALE	WHO IV	Untreated primary GBM	1	1	Wildtype	non-codel	Unmethylated
TCGA-19-1390	772	Dead	63	FEMALE	WHO IV	Untreated primary GBM	0	Unknown	Wildtype	non-codel	Methylated
TCGA-14-1794	30	Dead	59	MALE	WHO IV	Untreated primary GBM	1	0	Wildtype	non-codel	Unmethylated
TCGA-12-0618	395	Dead	49	MALE	WHO IV	Untreated primary GBM	1	1	Wildtype	non-codel	NA
TCGA-06-0646	175	Dead	60	MALE	WHO IV	Untreated primary GBM	1	Unknown	Wildtype	non-codel	NA
TCGA-12-0707	864	Dead	55	MALE	WHO IV	Untreated primary GBM	Unknown	Unknown	Wildtype	non-codel	NA
TCGA-28-5209	442	Alive	66	FEMALE	WHO IV	Untreated primary GBM	1	1	Wildtype	non-codel	Methylated
TCGA-26-5136	577	Dead	78	FEMALE	WHO IV	Untreated primary GBM	Unknown	Unknown	Wildtype	non-codel	Methylated
TCGA-41-3392	30	Dead	88	MALE	WHO IV	Untreated primary GBM	0	Unknown	Wildtype	non-codel	Unmethylated
TCGA-12-0620	318	Dead	57	MALE	WHO IV	Untreated primary GBM	1	1	Wildtype	non-codel	NA
TCGA-32-4211	383	Dead	56	MALE	WHO IV	Untreated primary GBM	1	1	Wildtype	non-codel	Unmethylated
TCGA-76-6660	114	Dead	73	MALE	WHO IV	GBM	Unknown	Unknown	Wildtype	non-codel	Unmethylated
TCGA-06-1086	208	Dead	42	MALE	WHO IV	Untreated primary GBM	1	1	NA	non-codel	Unmethylated
TCGA-06-0194	142	Dead	37	FEMALE	WHO IV	Untreated primary GBM	1	Unknown	NA	non-codel	NA
TCGA-19-5958	428	Dead	56	MALE	WHO IV	Untreated primary GBM	1	1	Wildtype	non-codel	Unmethylated
TCGA-12-5295	454	Dead	60	FEMALE	WHO IV	Untreated primary GBM	1	1	Wildtype	non-codel	Methylated
TCGA-32-1977	3	Alive	63	FEMALE	WHO IV	Untreated primary GBM	Unknown	Unknown	Wildtype	non-codel	Methylated
TCGA-08-0349	298	Dead	46	MALE	WHO IV	Untreated primary GBM	1	1	Wildtype	non-codel	NA
TCGA-19-A6J5	868	Alive	40	MALE	WHO IV	GBM	1	1	Mutant	non-codel	Methylated
TCGA-32-1970	468	Dead	59	MALE	WHO IV	Untreated primary GBM	1	1	Wildtype	non-codel	Unmethylated
TCGA-08-0360	468	Dead	76	MALE	WHO IV	Untreated primary GBM	1	0	Wildtype	NA	NA
TCGA-06-A5U0	815	Alive	21	FEMALE	WHO IV	GBM	1	1	Wildtype	non-codel	Methylated
TCGA-02-2485	470	Alive	53	MALE	WHO IV	Untreated primary GBM	1	1	Wildtype	non-codel	Unmethylated
TCGA-06-5413	268	Alive	67	MALE	WHO IV	Untreated primary GBM	1	1	Wildtype	non-codel	Unmethylated
TCGA-02-0289	432	Dead	57	MALE	WHO IV	Untreated primary GBM	1	1	NA	non-codel	NA
TCGA-06-0139	362	Dead	40	MALE	WHO IV	Untreated primary GBM	1	1	Wildtype	non-codel	Unmethylated
TCGA-14-1043	24	Dead	61	MALE	WHO IV	Untreated primary GBM	1	0	Wildtype	non-codel	Unmethylated
TCGA-06-0744	1426	Dead	66	MALE	WHO IV	Untreated primary GBM	1	1	Wildtype	non-codel	NA
TCGA-06-5411	254	Dead	51	MALE	WHO IV	Untreated primary GBM	1	1	Wildtype	non-codel	Unmethylated
TCGA-06-0686	432	Dead	53	MALE	WHO IV	Untreated primary GBM	1	1	Wildtype	non-codel	NA
TCGA-02-2470	393	Dead	57	MALE	WHO IV	Treated primary GBM	1	1	Wildtype	non-codel	Unmethylated
TCGA-87-5896	800	Alive	50	FEMALE	WHO IV	Untreated primary GBM	1	1	Wildtype	non-codel	Unmethylated
TCGA-06-0129	1024	Dead	30	MALE	WHO IV	Untreated primary GBM	1	1	Mutant	non-codel	Methylated
TCGA-06-0397	274	Dead	57	FEMALE	WHO IV	Untreated primary GBM	1	1	NA	non-codel	NA
TCGA-06-2567	133	Dead	65	MALE	WHO IV	Untreated primary GBM	1	1	Wildtype	non-codel	Methylated
TCGA-12-1094	372	Dead	56	MALE	WHO IV	Untreated primary GBM	1	1	NA	non-codel	Unmethylated
TCGA-74-6573	105	Dead	67	MALE	WHO IV	Untreated primary GBM	1	1	Wildtype	non-codel	Unmethylated
TCGA-06-0166	178	Dead	51	MALE	WHO IV	Untreated primary GBM	1	1	Wildtype	non-codel	NA
TCGA-19-A60I	541	Alive	39	MALE	WHO IV	GBM	1	1	Wildtype	non-codel	Methylated
TCGA-32-1979	593	Dead	69	FEMALE	WHO IV	Untreated primary GBM	Unknown	Unknown	Wildtype	non-codel	Unmethylated
TCGA-02-0064	600	Dead	50	MALE	WHO IV	Untreated primary GBM	1	1	Wildtype	non-codel	Methylated
TCGA-06-0146	611	Dead	33	FEMALE	WHO IV	Untreated primary GBM	1	1	NA	non-codel	NA
TCGA-06-5408	357	Dead	54	FEMALE	WHO IV	Untreated primary GBM	1	1	Wildtype	non-codel	Unmethylated
TCGA-02-0025	1300	Dead	47	MALE	WHO IV	Untreated primary GBM	1	1	Wildtype	non-codel	NA
TCGA-08-0346	256	Dead	69	MALE	WHO IV	Untreated primary GBM	1	1	Wildtype	non-codel	NA
TCGA-08-0245	1151	Dead	31	FEMALE	WHO IV	Untreated primary GBM	1	1	Wildtype	non-codel	NA
TCGA-06-5415	260	Alive	60	MALE	WHO IV	Untreated primary GBM	1	1	Wildtype	non-codel	Unmethylated
TCGA-14-1037	587	Dead	66	FEMALE	WHO IV	Untreated primary GBM	1	1	Wildtype	non-codel	Unmethylated
TCGA-74-6577	132	Alive	51	MALE	WHO IV	Untreated primary GBM	1	1	Wildtype	non-codel	Unmethylated
TCGA-02-0010	1077	Dead	20	FEMALE	WHO IV	Treated primary GBM	1	1	Mutant	non-codel	Unmethylated
TCGA-02-0114	3041	Dead	37	FEMALE	WHO IV	Treated primary GBM	1	1	Mutant	non-codel	Methylated
TCGA-76-4927	535	Dead	58	MALE	WHO IV	Untreated primary GBM	Unknown	Unknown	Wildtype	NA	Unmethylated
TCGA-06-0878	218	Alive	74	MALE	WHO IV	Untreated primary GBM	1	1	Wildtype	non-codel	Unmethylated
TCGA-06-0644	384	Dead	71	MALE	WHO IV	Untreated primary GBM	1	1	Wildtype	non-codel	NA
TCGA-06-A7TK	444	Dead	64	MALE	WHO IV	GBM	1	1	Wildtype	non-codel	Methylated
TCGA-16-0849	793	Alive	54	MALE	WHO IV	Untreated primary GBM	1	Unknown	Mutant	non-codel	Unmethylated
TCGA-32-4208	643	Alive	25	MALE	WHO IV	Untreated primary GBM	1	1	Mutant	non-codel	Methylated
TCGA-14-1450	1788	Alive	57	FEMALE	WHO IV	Untreated primary GBM	1	1	Wildtype	non-codel	Methylated
TCGA-12-1602	206	Dead	58	MALE	WHO IV	Untreated primary GBM	1	1	Wildtype	non-codel	Methylated
TCGA-14-0789	342	Dead	54	MALE	WHO IV	Untreated primary GBM	1	1	Wildtype	non-codel	Methylated
TCGA-27-1837	427	Dead	36	MALE	WHO IV	Untreated primary GBM	1	1	Wildtype	non-codel	Methylated
TCGA-12-5299	98	Dead	56	FEMALE	WHO IV	Untreated primary GBM	1	1	Wildtype	non-codel	Unmethylated
TCGA-06-0876	1405	Alive	72	FEMALE	WHO IV	Untreated primary GBM	1	1	Wildtype	non-codel	Methylated
TCGA-02-0339	377	Dead	67	MALE	WHO IV	Untreated primary GBM	1	Unknown	NA	non-codel	NA
TCGA-08-0351	1987	Dead	40	MALE	WHO IV	Untreated primary GBM	1	1	Wildtype	non-codel	NA
TCGA-76-4929	111	Dead	76	FEMALE	WHO IV	Untreated primary GBM	Unknown	Unknown	Wildtype	non-codel	Methylated
TCGA-76-6286	638	Dead	60	MALE	WHO IV	Untreated primary GBM	1	1	Wildtype	non-codel	Unmethylated
TCGA-06-6699	47	Alive	58	FEMALE	WHO IV	Untreated primary GBM	1	1	Wildtype	non-codel	Unmethylated
TCGA-06-0210	225	Dead	72	FEMALE	WHO IV	Untreated primary GBM	1	Unknown	Wildtype	non-codel	NA
TCGA-74-6578	436	Alive	58	MALE	WHO IV	Untreated primary GBM	1	1	Wildtype	non-codel	Methylated
TCGA-06-0209	232	Dead	76	MALE	WHO IV	Untreated primary GBM	1	Unknown	Wildtype	non-codel	NA
TCGA-12-0703	620	Dead	46	MALE	WHO IV	Untreated primary GBM	1	1	NA	non-codel	NA
TCGA-06-0160	359	Dead	56	FEMALE	WHO IV	GBM	1	1	Wildtype	non-codel	NA
TCGA-76-6656	147	Dead	66	MALE	WHO IV	Untreated primary GBM	1	1	Wildtype	non-codel	Methylated
TCGA-02-0057	604	Dead	66	FEMALE	WHO IV	Treated primary GBM	1	1	Wildtype	non-codel	Unmethylated
TCGA-32-2638	766	Dead	67	MALE	WHO IV	Untreated primary GBM	1	1	Wildtype	non-codel	Methylated
TCGA-02-0046	209	Dead	61	MALE	WHO IV	Untreated primary GBM	1	Unknown	Wildtype	non-codel	Methylated
TCGA-02-0083	691	Dead	59	FEMALE	WHO IV	Treated primary GBM	1	1	Wildtype	non-codel	Methylated
TCGA-74-6575	636	Alive	73	FEMALE	WHO IV	Untreated primary GBM	1	1	Wildtype	non-codel	Unmethylated
TCGA-08-0529	560	Dead	56	FEMALE	WHO IV	Untreated primary GBM	1	1	NA	non-codel	NA
TCGA-02-0258	503	Dead	36	FEMALE	WHO IV	Untreated primary GBM	1	Unknown	NA	non-codel	NA
TCGA-76-4931	279	Dead	70	FEMALE	WHO IV	Untreated primary GBM	1	1	Wildtype	non-codel	Unmethylated
TCGA-06-0939	814	Dead	79	FEMALE	WHO IV	Untreated primary GBM	1	1	Wildtype	non-codel	Unmethylated
TCGA-06-0241	1481	Dead	65	FEMALE	WHO IV	Untreated primary GBM	1	1	Wildtype	non-codel	NA
TCGA-12-0692	111	Dead	75	FEMALE	WHO IV	Untreated primary GBM	0	1	Wildtype	non-codel	NA
TCGA-41-2575	290	Dead	75	MALE	WHO IV	Untreated primary GBM	1	1	Wildtype	non-codel	Unmethylated
TCGA-32-1987	452	Dead	49	FEMALE	WHO IV	Untreated primary GBM	1	1	NA	non-codel	Unmethylated
TCGA-15-0742	419	Dead	65	MALE	WHO IV	Untreated primary GBM	1	1	Wildtype	non-codel	NA
TCGA-08-0359	103	Dead	59	FEMALE	WHO IV	Untreated primary GBM	1	Unknown	Wildtype	non-codel	NA
TCGA-12-0653	320	Dead	65	MALE	WHO IV	Untreated primary GBM	0	1	Wildtype	NA	NA
TCGA-02-0084	384	Dead	36	FEMALE	WHO IV	Untreated primary GBM	Unknown	Unknown	Mutant	non-codel	NA
TCGA-08-0517	1785	Dead	34	FEMALE	WHO IV	Untreated primary GBM	1	1	NA	non-codel	NA
TCGA-02-0043	557	Dead	54	FEMALE	WHO IV	Treated primary GBM	1	1	Wildtype	non-codel	Methylated
TCGA-15-1449	404	Dead	65	MALE	WHO IV	Untreated primary GBM	1	1	NA	non-codel	Methylated
TCGA-12-0827	1179	Dead	38	FEMALE	WHO IV	Untreated primary GBM	1	1	Mutant	non-codel	Methylated
TCGA-08-0246	127	Dead	57	FEMALE	WHO IV	Untreated primary GBM	1	1	Wildtype	non-codel	NA
TCGA-06-0211	360	Dead	47	MALE	WHO IV	Untreated primary GBM	1	1	Wildtype	non-codel	NA
TCGA-16-1045	883	Dead	49	FEMALE	WHO IV	Untreated primary GBM	1	Unknown	Wildtype	non-codel	Methylated
TCGA-26-1438	305	Alive	36	MALE	WHO IV	Untreated primary GBM	1	1	NA	non-codel	Unmethylated
TCGA-12-0691	369	Dead	63	MALE	WHO IV	Untreated primary GBM	1	1	Wildtype	non-codel	NA
TCGA-27-2519	550	Dead	48	MALE	WHO IV	Untreated primary GBM	1	1	Wildtype	non-codel	Unmethylated
TCGA-06-0750	28	Dead	43	MALE	WHO IV	Untreated primary GBM	0	Unknown	Wildtype	non-codel	NA
TCGA-08-0514	337	Dead	69	FEMALE	WHO IV	Untreated primary GBM	1	Unknown	NA	non-codel	NA
TCGA-28-2513	222	Alive	69	FEMALE	WHO IV	Untreated primary GBM	1	1	Wildtype	non-codel	Unmethylated
TCGA-06-0409	2201	Dead	43	MALE	WHO IV	Untreated primary GBM	1	1	NA	non-codel	NA
TCGA-19-0964	103	Alive	70	MALE	WHO IV	Untreated primary GBM	1	1	NA	non-codel	Methylated
TCGA-02-0009	322	Dead	61	FEMALE	WHO IV	Untreated primary GBM	1	Unknown	Wildtype	non-codel	Unmethylated
TCGA-02-2486	618	Dead	64	MALE	WHO IV	Untreated primary GBM	1	1	Wildtype	non-codel	Unmethylated
TCGA-02-0290	485	Dead	49	MALE	WHO IV	Untreated primary GBM	1	1	NA	non-codel	NA
TCGA-08-0392	22	Dead	60	MALE	WHO IV	Untreated primary GBM	0	Unknown	Wildtype	non-codel	NA
TCGA-19-5953	144	Dead	58	MALE	WHO IV	Untreated primary GBM	Unknown	Unknown	Wildtype	non-codel	Methylated
TCGA-28-5207	343	Dead	71	MALE	WHO IV	Untreated primary GBM	1	1	Wildtype	non-codel	Unmethylated
TCGA-16-1063	425	Dead	72	MALE	WHO IV	Untreated primary GBM	1	Unknown	NA	non-codel	Unmethylated
TCGA-26-5139	48	Alive	65	FEMALE	WHO IV	Untreated primary GBM	0	Unknown	Wildtype	non-codel	Unmethylated
TCGA-27-1834	1233	Dead	56	MALE	WHO IV	Untreated primary GBM	1	1	Wildtype	non-codel	Methylated
TCGA-08-0516	596	Dead	14	MALE	WHO IV	Untreated primary GBM	1	Unknown	NA	non-codel	NA
TCGA-02-0266	539	Dead	14	MALE	WHO IV	Untreated primary GBM	1	Unknown	NA	non-codel	NA
TCGA-06-0155	318	Dead	61	MALE	WHO IV	Untreated primary GBM	1	1	Wildtype	non-codel	Unmethylated
TCGA-12-0780	452	Dead	51	FEMALE	WHO IV	Untreated primary GBM	1	1	NA	non-codel	NA
TCGA-06-0394	329	Dead	51	MALE	WHO IV	Untreated primary GBM	1	1	NA	non-codel	NA
TCGA-12-0769	458	Dead	52	MALE	WHO IV	Untreated primary GBM	1	1	NA	non-codel	NA
TCGA-14-0812	99	Dead	65	MALE	WHO IV	Untreated primary GBM	0	1	Wildtype	non-codel	Methylated
TCGA-41-3915	184	Alive	48	MALE	WHO IV	Untreated primary GBM	1	1	Wildtype	non-codel	Methylated
TCGA-06-0219	22	Dead	67	MALE	WHO IV	Untreated primary GBM	0	Unknown	Wildtype	non-codel	NA
TCGA-02-0099	106	Dead	46	MALE	WHO IV	Untreated primary GBM	1	1	Wildtype	non-codel	Methylated
TCGA-06-0126	211	Dead	86	MALE	WHO IV	Untreated primary GBM	Unknown	Unknown	Wildtype	non-codel	Unmethylated
TCGA-06-0137	812	Dead	63	FEMALE	WHO IV	Untreated primary GBM	1	1	Wildtype	non-codel	Unmethylated
TCGA-16-1047	139	Dead	66	FEMALE	WHO IV	Untreated primary GBM	0	Unknown	NA	non-codel	Unmethylated
TCGA-12-3649	463	Dead	76	MALE	WHO IV	Untreated primary GBM	0	1	Wildtype	non-codel	Unmethylated
TCGA-14-1034	485	Dead	60	FEMALE	WHO IV	Untreated primary GBM	1	1	Wildtype	non-codel	Methylated
TCGA-06-0147	541	Dead	51	FEMALE	WHO IV	Untreated primary GBM	1	1	Wildtype	non-codel	Methylated
TCGA-08-0345	53	Dead	71	FEMALE	WHO IV	Untreated primary GBM	1	Unknown	Wildtype	non-codel	NA
TCGA-08-0385	82	Dead	71	MALE	WHO IV	Untreated primary GBM	Unknown	Unknown	Wildtype	NA	NA
TCGA-28-1752	258	Alive	42	FEMALE	WHO IV	Untreated primary GBM	1	1	Wildtype	non-codel	Methylated
TCGA-19-5947	202	Dead	47	FEMALE	WHO IV	Untreated primary GBM	1	Unknown	Wildtype	non-codel	Unmethylated
TCGA-06-0182	111	Dead	76	MALE	WHO IV	Untreated primary GBM	0	Unknown	NA	non-codel	NA
TCGA-76-6662	1048	Dead	58	MALE	WHO IV	Untreated primary GBM	1	1	Wildtype	non-codel	Unmethylated
TCGA-08-0344	3524	Dead	66	MALE	WHO IV	Untreated primary GBM	1	1	Mutant	codel	NA
TCGA-28-5216	415	Alive	52	MALE	WHO IV	Untreated primary GBM	1	1	Wildtype	non-codel	Unmethylated
TCGA-12-0662	1161	Dead	51	MALE	WHO IV	Untreated primary GBM	1	1	Wildtype	non-codel	NA
TCGA-32-2491	372	Dead	63	MALE	WHO IV	Untreated primary GBM	1	1	Wildtype	non-codel	Unmethylated
TCGA-06-0195	225	Dead	63	MALE	WHO IV	Untreated primary GBM	1	1	Wildtype	non-codel	NA
TCGA-06-0130	394	Dead	54	MALE	WHO IV	Untreated primary GBM	1	1	Wildtype	non-codel	Unmethylated
TCGA-06-6388	159	Dead	64	FEMALE	WHO IV	Untreated primary GBM	1	1	Wildtype	non-codel	Unmethylated
TCGA-32-1980	36	Dead	72	MALE	WHO IV	Untreated primary GBM	0	Unknown	Wildtype	non-codel	Unmethylated
TCGA-12-0820	562	Dead	40	MALE	WHO IV	Untreated primary GBM	1	1	Wildtype	non-codel	Unmethylated
TCGA-06-0412	291	Dead	56	FEMALE	WHO IV	Untreated primary GBM	1	1	NA	non-codel	NA
TCGA-06-0143	357	Dead	58	MALE	WHO IV	Untreated primary GBM	1	Unknown	Wildtype	non-codel	Unmethylated
TCGA-27-2523	489	Dead	63	MALE	WHO IV	Untreated primary GBM	1	1	Wildtype	non-codel	Methylated
TCGA-32-2634	693	Alive	82	MALE	WHO IV	Untreated primary GBM	1	1	Wildtype	non-codel	Methylated
TCGA-26-5133	452	Alive	59	MALE	WHO IV	Untreated primary GBM	1	1	Wildtype	non-codel	Unmethylated
TCGA-02-0016	2648	Dead	50	MALE	WHO IV	Untreated primary GBM	1	1	Wildtype	non-codel	NA
TCGA-19-2631	213	Dead	74	FEMALE	WHO IV	Untreated primary GBM	1	Unknown	Wildtype	non-codel	Methylated
TCGA-12-0821	323	Dead	62	MALE	WHO IV	Untreated primary GBM	1	1	Wildtype	non-codel	Unmethylated
TCGA-06-0743	803	Dead	69	MALE	WHO IV	Untreated primary GBM	1	1	Wildtype	non-codel	NA
TCGA-26-5135	270	Dead	72	FEMALE	WHO IV	Untreated primary GBM	Unknown	Unknown	Wildtype	non-codel	Methylated
TCGA-06-0875	1322	Alive	61	FEMALE	WHO IV	Untreated primary GBM	1	1	Wildtype	non-codel	Unmethylated
TCGA-06-6698	145	Alive	53	FEMALE	WHO IV	Untreated primary GBM	1	1	Wildtype	non-codel	Unmethylated
TCGA-02-2466	511	Dead	61	MALE	WHO IV	Treated primary GBM	1	1	Wildtype	non-codel	Unmethylated
TCGA-02-0107	537	Dead	56	MALE	WHO IV	Treated primary GBM	1	1	Wildtype	non-codel	Unmethylated
TCGA-06-0745	239	Dead	59	MALE	WHO IV	Untreated primary GBM	1	Unknown	Wildtype	non-codel	NA
TCGA-08-0354	546	Dead	52	FEMALE	WHO IV	Untreated primary GBM	1	1	Wildtype	non-codel	NA
TCGA-32-1973	641	Dead	21	MALE	WHO IV	Untreated primary GBM	1	1	NA	non-codel	Methylated
TCGA-19-2629	737	Dead	60	MALE	WHO IV	Untreated primary GBM	1	1	Mutant	non-codel	Unmethylated
TCGA-06-0649	64	Dead	73	FEMALE	WHO IV	Untreated primary GBM	0	Unknown	Wildtype	non-codel	NA
TCGA-06-0402	8	Dead	71	MALE	WHO IV	Untreated primary GBM	0	Unknown	NA	non-codel	NA
TCGA-19-2625	124	Dead	76	FEMALE	WHO IV	Untreated primary GBM	0	Unknown	Wildtype	non-codel	Unmethylated
TCGA-14-1823	543	Dead	58	FEMALE	WHO IV	Untreated primary GBM	1	1	Wildtype	non-codel	Methylated
TCGA-12-1097	442	Dead	61	MALE	WHO IV	Untreated primary GBM	1	1	NA	non-codel	Unmethylated
TCGA-02-0113	2818	Alive	43	FEMALE	WHO IV	Treated primary GBM	1	1	Wildtype	non-codel	Unmethylated
TCGA-08-0521	146	Dead	17	MALE	WHO IV	Untreated primary GBM	1	1	NA	non-codel	NA
TCGA-02-0011	630	Dead	18	FEMALE	WHO IV	Untreated primary GBM	1	1	Wildtype	non-codel	Methylated
TCGA-08-0355	747	Dead	30	FEMALE	WHO IV	Untreated primary GBM	1	1	Wildtype	non-codel	NA
TCGA-06-6700	145	Alive	76	MALE	WHO IV	Untreated primary GBM	1	1	Wildtype	non-codel	Methylated
TCGA-08-0390	425	Dead	69	MALE	WHO IV	Untreated primary GBM	1	1	Wildtype	non-codel	NA
TCGA-02-0007	705	Dead	40	FEMALE	WHO IV	Treated primary GBM	1	1	Wildtype	non-codel	Unmethylated
TCGA-06-0148	307	Dead	76	MALE	WHO IV	Untreated primary GBM	1	Unknown	Wildtype	non-codel	Unmethylated
TCGA-14-0817	164	Dead	69	FEMALE	WHO IV	Untreated primary GBM	0	0	Wildtype	non-codel	Unmethylated
TCGA-16-1060	278	Dead	70	FEMALE	WHO IV	Untreated primary GBM	1	Unknown	NA	non-codel	Unmethylated
TCGA-06-0877	204	Alive	78	MALE	WHO IV	Untreated primary GBM	1	Unknown	Wildtype	non-codel	Methylated
TCGA-06-0125	1448	Dead	63	FEMALE	WHO IV	Untreated primary GBM	1	1	Wildtype	non-codel	Methylated
TCGA-OX-A56R	180	Dead	68	MALE	WHO IV	GBM	Unknown	Unknown	Wildtype	non-codel	Methylated
TCGA-16-1062	646	Dead	57	FEMALE	WHO IV	Untreated primary GBM	1	Unknown	NA	non-codel	Methylated
TCGA-06-0173	136	Dead	72	FEMALE	WHO IV	Untreated primary GBM	0	Unknown	Wildtype	non-codel	NA
TCGA-06-1802	466	Dead	61	MALE	WHO IV	Untreated primary GBM	1	1	NA	non-codel	Methylated
TCGA-08-0244	690	Dead	62	MALE	WHO IV	Untreated primary GBM	1	1	Wildtype	non-codel	NA
TCGA-12-3653	442	Dead	34	FEMALE	WHO IV	Untreated primary GBM	1	1	Wildtype	non-codel	Unmethylated
TCGA-06-5859	139	Alive	63	MALE	WHO IV	Untreated primary GBM	1	1	Wildtype	non-codel	Unmethylated
TCGA-08-0352	39	Dead	79	MALE	WHO IV	Untreated primary GBM	0	Unknown	Wildtype	non-codel	NA
TCGA-27-1835	648	Dead	53	FEMALE	WHO IV	Untreated primary GBM	1	1	Wildtype	non-codel	Methylated
TCGA-16-0846	119	Dead	85	MALE	WHO IV	Untreated primary GBM	0	Unknown	Wildtype	non-codel	Methylated
TCGA-02-0116	1489	Dead	51	MALE	WHO IV	Treated primary GBM	1	1	Wildtype	non-codel	Unmethylated
TCGA-02-0087	1757	Alive	27	FEMALE	WHO IV	Untreated primary GBM	1	Unknown	NA	non-codel	NA
TCGA-08-0356	946	Dead	59	FEMALE	WHO IV	Untreated primary GBM	1	1	Wildtype	non-codel	NA
TCGA-08-0524	221	Dead	17	FEMALE	WHO IV	Untreated primary GBM	1	1	NA	non-codel	NA
TCGA-14-1451	703	Dead	39	MALE	WHO IV	Untreated primary GBM	1	1	Wildtype	non-codel	Unmethylated
TCGA-14-1459	378	Dead	63	FEMALE	WHO IV	Untreated primary GBM	1	1	NA	non-codel	Methylated
TCGA-06-2557	33	Dead	76	MALE	WHO IV	Untreated primary GBM	0	Unknown	Wildtype	non-codel	Unmethylated
TCGA-14-1456	1246	Alive	23	MALE	WHO IV	Untreated primary GBM	1	1	Mutant	non-codel	Unmethylated
TCGA-02-0054	199	Dead	44	FEMALE	WHO IV	Untreated primary GBM	1	1	Wildtype	non-codel	Methylated
TCGA-02-0439	20	Dead	70	FEMALE	WHO IV	Untreated primary GBM	1	Unknown	NA	NA	NA
TCGA-08-0357	1143	Dead	49	MALE	WHO IV	Untreated primary GBM	1	1	Wildtype	non-codel	NA
TCGA-06-0237	415	Dead	75	FEMALE	WHO IV	Untreated primary GBM	1	Unknown	Wildtype	non-codel	NA
TCGA-12-0775	232	Dead	75	FEMALE	WHO IV	Untreated primary GBM	1	1	Wildtype	non-codel	NA
TCGA-06-5417	155	Alive	45	FEMALE	WHO IV	Untreated primary GBM	1	1	Mutant	NA	Methylated
TCGA-06-5416	204	Alive	23	FEMALE	WHO IV	Untreated primary GBM	1	1	NA	non-codel	Unmethylated
TCGA-08-0518	588	Dead	60	FEMALE	WHO IV	Untreated primary GBM	1	Unknown	NA	non-codel	NA
TCGA-14-1825	232	Dead	70	MALE	WHO IV	Untreated primary GBM	1	0	Wildtype	non-codel	Unmethylated
TCGA-12-1093	486	Dead	66	FEMALE	WHO IV	Untreated primary GBM	1	1	Wildtype	non-codel	Unmethylated
TCGA-76-6663	567	Dead	44	FEMALE	WHO IV	Untreated primary GBM	1	1	Wildtype	non-codel	Unmethylated
TCGA-02-0440	345	Dead	62	MALE	WHO IV	Untreated primary GBM	1	1	NA	non-codel	NA
TCGA-06-0413	96	Dead	77	FEMALE	WHO IV	Untreated primary GBM	0	Unknown	NA	non-codel	NA
TCGA-06-0192	1185	Dead	58	MALE	WHO IV	Untreated primary GBM	1	1	Wildtype	non-codel	NA
TCGA-02-0080	2729	Dead	28	MALE	WHO IV	Untreated primary GBM	1	1	Mutant	non-codel	Methylated
TCGA-28-1753	37	Alive	53	MALE	WHO IV	Untreated primary GBM	1	Unknown	Wildtype	non-codel	Unmethylated
TCGA-06-0197	169	Dead	65	FEMALE	WHO IV	Untreated primary GBM	0	1	Wildtype	non-codel	NA
TCGA-41-2571	26	Dead	89	MALE	WHO IV	Untreated primary GBM	0	1	Wildtype	non-codel	Unmethylated
TCGA-08-0389	467	Dead	59	MALE	WHO IV	Untreated primary GBM	1	1	Wildtype	non-codel	NA
TCGA-14-1401	114	Dead	54	MALE	WHO IV	Untreated primary GBM	0	0	NA	non-codel	Methylated
TCGA-28-2506	205	Alive	63	FEMALE	WHO IV	Untreated primary GBM	1	1	Wildtype	non-codel	Methylated
TCGA-19-1387	181	Alive	81	MALE	WHO IV	Untreated primary GBM	1	1	Wildtype	non-codel	Methylated
TCGA-06-0133	435	Dead	64	MALE	WHO IV	Untreated primary GBM	1	1	Wildtype	non-codel	Unmethylated
TCGA-06-A7TL	539	Alive	30	FEMALE	WHO IV	GBM	1	1	Mutant	non-codel	Methylated
TCGA-06-5414	273	Alive	61	MALE	WHO IV	Untreated primary GBM	1	1	Wildtype	non-codel	Unmethylated
TCGA-19-1788	112	Dead	39	MALE	WHO IV	Untreated primary GBM	1	1	Mutant	NA	Methylated
TCGA-06-0176	2768	Alive	34	MALE	WHO IV	Untreated primary GBM	1	1	Wildtype	non-codel	NA
TCGA-12-1088	3881	Dead	53	FEMALE	WHO IV	Untreated primary GBM	1	1	Wildtype	non-codel	Unmethylated
TCGA-02-0451	493	Dead	62	FEMALE	WHO IV	Untreated primary GBM	1	Unknown	NA	non-codel	NA
TCGA-41-2573	272	Alive	59	MALE	WHO IV	Untreated primary GBM	1	1	Wildtype	non-codel	Methylated
TCGA-28-1749	280	Alive	73	MALE	WHO IV	Untreated primary GBM	1	1	Wildtype	non-codel	Unmethylated
TCGA-02-0015	627	Dead	50	MALE	WHO IV	Untreated primary GBM	1	1	Wildtype	non-codel	NA
TCGA-19-5955	54	Dead	83	MALE	WHO IV	Untreated primary GBM	0	Unknown	Wildtype	non-codel	Methylated
TCGA-06-0213	16	Dead	55	FEMALE	WHO IV	Untreated primary GBM	0	Unknown	Wildtype	non-codel	NA
TCGA-27-1836	914	Dead	33	FEMALE	WHO IV	Untreated primary GBM	1	1	Wildtype	non-codel	Methylated
TCGA-27-2526	87	Dead	79	FEMALE	WHO IV	Untreated primary GBM	0	0	Wildtype	non-codel	Unmethylated
TCGA-41-6646	379	Dead	73	FEMALE	WHO IV	Untreated primary GBM	1	1	Wildtype	non-codel	Methylated
TCGA-12-0619	1062	Dead	60	MALE	WHO IV	Untreated primary GBM	1	1	Wildtype	non-codel	NA
TCGA-06-0178	2681	Dead	38	MALE	WHO IV	Untreated primary GBM	1	1	Mutant	non-codel	NA
TCGA-02-0023	612	Dead	38	FEMALE	WHO IV	Untreated primary GBM	1	1	Wildtype	non-codel	NA
TCGA-06-0167	347	Dead	44	MALE	WHO IV	GBM	1	1	Wildtype	NA	NA
TCGA-06-0650	717	Dead	39	FEMALE	WHO IV	Untreated primary GBM	1	1	Wildtype	non-codel	Unmethylated
TCGA-02-0260	515	Dead	54	MALE	WHO IV	Untreated primary GBM	1	Unknown	NA	non-codel	NA
TCGA-02-0422	441	Dead	50	MALE	WHO IV	Untreated primary GBM	1	Unknown	NA	non-codel	NA
TCGA-12-5301	62	Dead	59	MALE	WHO IV	Untreated primary GBM	1	1	Wildtype	non-codel	Methylated
TCGA-12-0829	626	Dead	75	MALE	WHO IV	Untreated primary GBM	1	1	Wildtype	non-codel	Methylated
TCGA-14-3477	115	Alive	38	FEMALE	WHO IV	Untreated primary GBM	1	1	Wildtype	non-codel	Unmethylated
TCGA-02-0021	2362	Dead	43	FEMALE	WHO IV	Untreated primary GBM	1	1	Wildtype	non-codel	Methylated
TCGA-14-0736	460	Dead	49	MALE	WHO IV	Untreated primary GBM	1	1	NA	non-codel	Unmethylated
TCGA-06-1806	466	Dead	47	MALE	WHO IV	GBM	1	1	Wildtype	non-codel	Unmethylated
TCGA-02-0106	355	Dead	54	MALE	WHO IV	Untreated primary GBM	1	1	NA	non-codel	NA
TCGA-28-5220	388	Dead	67	MALE	WHO IV	Untreated primary GBM	1	1	Wildtype	non-codel	Unmethylated
TCGA-06-0142	67	Dead	81	MALE	WHO IV	GBM	0	Unknown	Wildtype	non-codel	Unmethylated
TCGA-02-0006	558	Dead	56	FEMALE	WHO IV	Untreated primary GBM	1	1	Wildtype	non-codel	Unmethylated
TCGA-02-0033	86	Dead	54	MALE	WHO IV	Untreated primary GBM	1	Unknown	Wildtype	non-codel	Methylated
TCGA-02-0037	110	Dead	74	FEMALE	WHO IV	Untreated primary GBM	1	Unknown	Wildtype	non-codel	Unmethylated
TCGA-06-2569	13	Alive	24	FEMALE	WHO IV	Untreated primary GBM	Unknown	Unknown	Wildtype	non-codel	Unmethylated
TCGA-08-0525	486	Dead	52	MALE	WHO IV	Untreated primary GBM	1	1	NA	non-codel	NA
TCGA-14-1452	216	Dead	60	MALE	WHO IV	Untreated primary GBM	1	1	NA	non-codel	Methylated
TCGA-14-1402	975	Dead	58	FEMALE	WHO IV	Untreated primary GBM	1	1	NA	non-codel	Methylated
TCGA-06-0145	71	Dead	53	FEMALE	WHO IV	Untreated primary GBM	0	1	Wildtype	non-codel	Methylated
TCGA-19-5951	244	Dead	76	FEMALE	WHO IV	Untreated primary GBM	1	1	Wildtype	non-codel	Unmethylated
TCGA-28-1751	232	Alive	61	FEMALE	WHO IV	Untreated primary GBM	1	1	Wildtype	non-codel	Unmethylated
TCGA-06-0132	771	Dead	49	MALE	WHO IV	Untreated primary GBM	1	Unknown	Wildtype	non-codel	NA
TCGA-06-5858	187	Alive	45	FEMALE	WHO IV	Untreated primary GBM	1	1	Wildtype	non-codel	Unmethylated
TCGA-12-0828	272	Dead	57	MALE	WHO IV	Untreated primary GBM	1	1	Wildtype	non-codel	Unmethylated
TCGA-15-1447	1618	Alive	36	FEMALE	WHO IV	Untreated primary GBM	1	1	NA	non-codel	Methylated
TCGA-14-0787	68	Dead	69	MALE	WHO IV	Untreated primary GBM	0	0	Wildtype	non-codel	Methylated
TCGA-06-0157	97	Dead	63	FEMALE	WHO IV	Untreated primary GBM	1	Unknown	Wildtype	non-codel	NA
TCGA-02-0104	1977	Dead	29	FEMALE	WHO IV	Untreated primary GBM	1	1	Wildtype	non-codel	NA
TCGA-06-2559	150	Dead	83	MALE	WHO IV	Untreated primary GBM	1	1	Wildtype	non-codel	Methylated
TCGA-08-0348	370	Dead	63	MALE	WHO IV	Untreated primary GBM	1	1	Wildtype	non-codel	NA
TCGA-14-1396	34	Dead	78	FEMALE	WHO IV	Untreated primary GBM	0	0	Wildtype	non-codel	Methylated
TCGA-19-5959	511	Dead	77	FEMALE	WHO IV	Untreated primary GBM	1	1	Wildtype	non-codel	Methylated
TCGA-28-2512	343	Dead	37	MALE	WHO IV	Untreated primary GBM	0	1	NA	NA	Unmethylated
TCGA-02-0068	804	Dead	57	MALE	WHO IV	Untreated primary GBM	1	1	Wildtype	non-codel	NA
TCGA-06-5856	114	Dead	58	MALE	WHO IV	Untreated primary GBM	0	Unknown	Wildtype	non-codel	Unmethylated
TCGA-06-1084	728	Dead	54	MALE	WHO IV	Untreated primary GBM	1	1	Wildtype	non-codel	Methylated
TCGA-06-6389	237	Alive	49	FEMALE	WHO IV	Untreated primary GBM	1	1	Mutant	non-codel	Methylated
TCGA-28-5213	298	Alive	72	MALE	WHO IV	Untreated primary GBM	1	1	Wildtype	non-codel	Unmethylated
TCGA-12-1091	1010	Dead	10	FEMALE	WHO IV	Untreated primary GBM	1	1	NA	non-codel	Methylated
TCGA-08-0373	134	Dead	69	MALE	WHO IV	Untreated primary GBM	Unknown	Unknown	Wildtype	NA	NA
TCGA-02-0038	326	Dead	48	FEMALE	WHO IV	Untreated primary GBM	1	1	Wildtype	non-codel	Unmethylated
TCGA-06-0410	143	Dead	76	FEMALE	WHO IV	Untreated primary GBM	0	Unknown	NA	non-codel	NA
TCGA-06-0747	82	Dead	53	MALE	WHO IV	Untreated primary GBM	1	Unknown	Wildtype	non-codel	NA
TCGA-02-0024	1615	Dead	35	MALE	WHO IV	Treated primary GBM	1	1	Wildtype	non-codel	Unmethylated
TCGA-06-0141	313	Dead	62	MALE	WHO IV	Untreated primary GBM	1	1	Wildtype	non-codel	Unmethylated
TCGA-02-0456	102	Dead	67	FEMALE	WHO IV	Untreated primary GBM	1	Unknown	NA	non-codel	NA
TCGA-12-0818	2791	Dead	45	FEMALE	WHO IV	Untreated primary GBM	1	1	Mutant	non-codel	Methylated
TCGA-19-1386	276	Dead	51	MALE	WHO IV	Untreated primary GBM	1	1	Wildtype	non-codel	Unmethylated
TCGA-06-0127	121	Dead	67	MALE	WHO IV	Untreated primary GBM	1	1	Wildtype	non-codel	NA
TCGA-02-0332	782	Dead	46	FEMALE	WHO IV	Untreated primary GBM	1	1	NA	non-codel	NA
TCGA-06-6693	3667	Dead	64	FEMALE	WHO IV	Untreated primary GBM	0	Unknown	Wildtype	non-codel	Unmethylated
TCGA-19-0963	434	Dead	61	MALE	WHO IV	Untreated primary GBM	1	1	NA	non-codel	Unmethylated
TCGA-26-1439	422	Dead	63	MALE	WHO IV	Untreated primary GBM	1	1	Wildtype	non-codel	Unmethylated
TCGA-RR-A6KB	0	Alive	51	MALE	WHO IV	GBM	Unknown	Unknown	Wildtype	non-codel	Unmethylated
TCGA-19-1786	218	Alive	64	FEMALE	WHO IV	Untreated primary GBM	1	Unknown	Wildtype	non-codel	Unmethylated
TCGA-12-0654	231	Dead	48	FEMALE	WHO IV	Untreated primary GBM	1	0	NA	non-codel	NA
TCGA-14-1395	42	Dead	52	MALE	WHO IV	Untreated primary GBM	0	1	Wildtype	non-codel	Unmethylated
TCGA-27-1832	300	Dead	59	FEMALE	WHO IV	Untreated primary GBM	1	1	Wildtype	non-codel	Unmethylated
TCGA-27-2518	753	Dead	52	MALE	WHO IV	Untreated primary GBM	1	1	Wildtype	non-codel	Unmethylated
TCGA-4W-AA9T	778	Alive	54	FEMALE	WHO IV	GBM	1	1	Wildtype	non-codel	Methylated
TCGA-19-5950	523	Dead	52	FEMALE	WHO IV	Untreated primary GBM	1	1	Wildtype	non-codel	Methylated
TCGA-28-1746	6	Alive	77	FEMALE	WHO IV	Untreated primary GBM	1	Unknown	Wildtype	non-codel	Methylated
TCGA-02-0004	345	Dead	59	MALE	WHO IV	Untreated primary GBM	1	1	Wildtype	NA	NA
TCGA-06-0190	317	Dead	62	MALE	WHO IV	Untreated primary GBM	1	Unknown	Wildtype	non-codel	NA
TCGA-12-0826	845	Dead	38	FEMALE	WHO IV	Untreated primary GBM	1	Unknown	Wildtype	non-codel	Unmethylated
TCGA-08-0522	635	Dead	61	MALE	WHO IV	Untreated primary GBM	1	1	NA	NA	NA
TCGA-02-0337	764	Dead	48	MALE	WHO IV	Untreated primary GBM	1	1	NA	non-codel	NA
TCGA-27-2521	510	Dead	34	MALE	WHO IV	Untreated primary GBM	1	1	Mutant	non-codel	Methylated
TCGA-06-0645	175	Dead	55	FEMALE	WHO IV	Untreated primary GBM	0	Unknown	Wildtype	non-codel	NA
TCGA-02-0055	76	Dead	62	FEMALE	WHO IV	Untreated primary GBM	1	1	Wildtype	non-codel	Unmethylated
TCGA-12-0776	296	Dead	52	MALE	WHO IV	Untreated primary GBM	1	1	NA	non-codel	NA
TCGA-32-2615	485	Dead	62	MALE	WHO IV	Untreated primary GBM	1	1	Wildtype	non-codel	Unmethylated
TCGA-06-A6S1	78	Dead	53	FEMALE	WHO IV	GBM	1	1	Wildtype	non-codel	Unmethylated
TCGA-12-1599	781	Dead	47	FEMALE	WHO IV	Untreated primary GBM	1	1	Wildtype	non-codel	Methylated
TCGA-19-0960	262	Alive	83	FEMALE	WHO IV	Untreated primary GBM	1	1	NA	non-codel	Methylated
TCGA-12-1598	476	Dead	75	FEMALE	WHO IV	Untreated primary GBM	1	1	Wildtype	non-codel	Methylated
TCGA-32-1991	515	Dead	60	MALE	WHO IV	Untreated primary GBM	1	1	Wildtype	non-codel	Unmethylated
TCGA-12-1090	231	Dead	58	MALE	WHO IV	Untreated primary GBM	1	1	NA	non-codel	Methylated
TCGA-28-1750	254	Alive	40	FEMALE	WHO IV	Untreated primary GBM	1	1	Wildtype	non-codel	Unmethylated
TCGA-12-0772	1638	Dead	46	MALE	WHO IV	Untreated primary GBM	1	1	NA	non-codel	NA
TCGA-02-0333	133	Dead	77	FEMALE	WHO IV	Untreated primary GBM	1	Unknown	NA	non-codel	NA
TCGA-02-0338	322	Dead	41	MALE	WHO IV	Untreated primary GBM	1	Unknown	NA	non-codel	NA
TCGA-08-0375	372	Dead	51	FEMALE	WHO IV	Untreated primary GBM	1	Unknown	Wildtype	non-codel	NA
TCGA-76-6283	165	Dead	71	FEMALE	WHO IV	GBM	Unknown	Unknown	Wildtype	non-codel	Methylated
TCGA-06-0162	104	Dead	47	FEMALE	WHO IV	Untreated primary GBM	1	1	NA	non-codel	NA
TCGA-16-1460	195	Alive	36	FEMALE	WHO IV	Untreated primary GBM	1	Unknown	Mutant	non-codel	Methylated
TCGA-06-6694	224	Dead	76	FEMALE	WHO IV	Untreated primary GBM	Unknown	Unknown	Wildtype	non-codel	Methylated
TCGA-02-0028	2755	Dead	39	MALE	WHO IV	Treated primary GBM	1	1	Mutant	codel	Methylated
TCGA-28-1755	47	Dead	52	FEMALE	WHO IV	Untreated primary GBM	1	1	Wildtype	non-codel	Unmethylated
TCGA-06-2570	958	Alive	21	FEMALE	WHO IV	Untreated primary GBM	1	1	Mutant	non-codel	Methylated
TCGA-28-2514	160	Alive	45	MALE	WHO IV	Untreated primary GBM	1	1	Wildtype	non-codel	Unmethylated
TCGA-02-0271	440	Dead	26	MALE	WHO IV	Untreated primary GBM	1	Unknown	NA	non-codel	NA
TCGA-74-6584	228	Alive	55	FEMALE	WHO IV	Untreated primary GBM	1	1	Wildtype	non-codel	Unmethylated
TCGA-06-5410	108	Dead	72	FEMALE	WHO IV	Untreated primary GBM	0	Unknown	Wildtype	non-codel	Methylated
TCGA-32-1978	482	Dead	57	MALE	WHO IV	Untreated primary GBM	Unknown	Unknown	NA	non-codel	Unmethylated
TCGA-19-2624	5	Dead	51	MALE	WHO IV	Untreated primary GBM	0	Unknown	Wildtype	non-codel	Unmethylated
TCGA-14-0740	364	Dead	70	MALE	WHO IV	Untreated primary GBM	1	0	Wildtype	non-codel	Methylated
TCGA-76-4932	1458	Dead	50	FEMALE	WHO IV	Treated primary GBM	1	1	Wildtype	NA	Methylated
TCGA-06-0214	457	Dead	66	MALE	WHO IV	Untreated primary GBM	1	1	Wildtype	non-codel	NA
TCGA-19-5954	368	Dead	72	FEMALE	WHO IV	Untreated primary GBM	1	1	Wildtype	non-codel	Methylated
TCGA-19-A6J4	121	Dead	68	MALE	WHO IV	GBM	Unknown	Unknown	Wildtype	non-codel	Unmethylated
TCGA-RR-A6KC	625	Dead	55	MALE	WHO IV	GBM	1	Unknown	Wildtype	non-codel	Unmethylated
TCGA-02-0003	144	Dead	50	MALE	WHO IV	Untreated primary GBM	1	1	Wildtype	non-codel	Unmethylated
TCGA-14-0865	502	Dead	67	MALE	WHO IV	Untreated primary GBM	1	1	Wildtype	non-codel	Methylated
TCGA-02-0269	327	Dead	68	MALE	WHO IV	Untreated primary GBM	1	Unknown	NA	non-codel	NA
TCGA-06-0168	598	Dead	59	FEMALE	WHO IV	Untreated primary GBM	1	1	Wildtype	non-codel	NA
TCGA-02-0048	98	Dead	80	MALE	WHO IV	Untreated primary GBM	1	Unknown	Wildtype	non-codel	NA
TCGA-06-0749	82	Dead	50	MALE	WHO IV	Untreated primary GBM	1	Unknown	Wildtype	non-codel	NA
TCGA-RR-A6KA	191	Dead	72	FEMALE	WHO IV	GBM	0	Unknown	Wildtype	non-codel	Methylated
TCGA-06-0201	12	Dead	51	FEMALE	WHO IV	Untreated primary GBM	0	Unknown	Wildtype	non-codel	NA
TCGA-15-1444	1537	Dead	21	MALE	WHO IV	GBM	1	1	Mutant	non-codel	Methylated
TCGA-06-0156	178	Dead	57	MALE	WHO IV	Untreated primary GBM	1	1	Mutant	NA	NA
TCGA-76-6280	346	Dead	57	MALE	WHO IV	Untreated primary GBM	1	1	Wildtype	non-codel	Methylated
TCGA-27-2527	438	Dead	81	MALE	WHO IV	Untreated primary GBM	1	0	Wildtype	non-codel	Methylated
TCGA-76-4926	138	Dead	68	MALE	WHO IV	Untreated primary GBM	1	1	Wildtype	non-codel	Unmethylated
TCGA-19-1791	4	Alive	82	FEMALE	WHO IV	Untreated primary GBM	0	Unknown	Wildtype	non-codel	Unmethylated
TCGA-08-0509	382	Dead	63	MALE	WHO IV	Untreated primary GBM	Unknown	Unknown	NA	non-codel	NA
TCGA-02-0317	372	Dead	40	MALE	WHO IV	Untreated primary GBM	1	1	NA	non-codel	NA
TCGA-06-0175	123	Dead	69	MALE	WHO IV	Untreated primary GBM	1	1	NA	non-codel	NA
TCGA-02-0069	873	Alive	31	FEMALE	WHO IV	Untreated primary GBM	1	1	Wildtype	non-codel	Methylated
TCGA-16-0848	535	Dead	57	MALE	WHO IV	Untreated primary GBM	1	Unknown	NA	non-codel	Methylated
TCGA-02-0324	235	Dead	69	FEMALE	WHO IV	Untreated primary GBM	1	Unknown	NA	non-codel	NA
TCGA-02-0326	223	Dead	82	FEMALE	WHO IV	Untreated primary GBM	1	Unknown	NA	non-codel	NA
TCGA-02-0047	448	Dead	78	MALE	WHO IV	Untreated primary GBM	1	Unknown	Wildtype	non-codel	Unmethylated
TCGA-32-2494	632	Dead	58	FEMALE	WHO IV	Untreated primary GBM	1	1	Wildtype	non-codel	Methylated
TCGA-06-A5U1	57	Dead	78	FEMALE	WHO IV	GBM	0	Unknown	Wildtype	non-codel	Methylated
TCGA-26-1440	296	Alive	48	MALE	WHO IV	Untreated primary GBM	1	1	NA	non-codel	Unmethylated
TCGA-08-0358	678	Dead	50	MALE	WHO IV	Untreated primary GBM	1	1	Wildtype	non-codel	NA
TCGA-02-0059	291	Dead	68	FEMALE	WHO IV	Untreated primary GBM	1	Unknown	NA	non-codel	NA
TCGA-14-1795	60	Dead	66	MALE	WHO IV	Untreated primary GBM	0	1	Wildtype	non-codel	Methylated
TCGA-32-2632	269	Dead	80	MALE	WHO IV	Untreated primary GBM	Unknown	Unknown	Wildtype	non-codel	Unmethylated
TCGA-27-1838	350	Dead	59	FEMALE	WHO IV	Untreated primary GBM	1	1	Wildtype	non-codel	Unmethylated
TCGA-12-1099	126	Dead	68	FEMALE	WHO IV	Untreated primary GBM	1	1	NA	non-codel	Unmethylated
TCGA-12-0670	790	Dead	60	MALE	WHO IV	Untreated primary GBM	1	1	Wildtype	non-codel	Methylated
TCGA-76-4925	146	Dead	76	MALE	WHO IV	Untreated primary GBM	1	1	Wildtype	non-codel	Methylated
TCGA-06-2563	932	Alive	72	FEMALE	WHO IV	Untreated primary GBM	1	1	Wildtype	non-codel	Methylated
TCGA-06-0879	1229	Dead	52	MALE	WHO IV	Untreated primary GBM	1	1	Wildtype	non-codel	Methylated
TCGA-26-6173	241	Alive	57	MALE	WHO IV	Untreated primary GBM	1	1	Wildtype	non-codel	Unmethylated
TCGA-12-0615	467	Dead	78	FEMALE	WHO IV	Untreated primary GBM	1	1	Wildtype	non-codel	NA
TCGA-02-0102	822	Dead	42	MALE	WHO IV	Treated primary GBM	1	1	Wildtype	non-codel	Unmethylated
TCGA-08-0511	235	Dead	69	MALE	WHO IV	Untreated primary GBM	1	1	NA	NA	NA
TCGA-06-0124	620	Dead	67	MALE	WHO IV	Untreated primary GBM	1	1	Wildtype	non-codel	Methylated
TCGA-06-0164	1731	Dead	47	MALE	WHO IV	Untreated primary GBM	1	Unknown	NA	non-codel	NA
TCGA-12-3646	1339	Dead	59	FEMALE	WHO IV	Untreated primary GBM	1	1	Wildtype	non-codel	Methylated
TCGA-19-5952	575	Dead	62	MALE	WHO IV	Untreated primary GBM	1	Unknown	Wildtype	non-codel	Unmethylated
TCGA-14-0781	29	Dead	49	MALE	WHO IV	Untreated primary GBM	0	0	Wildtype	non-codel	Unmethylated
TCGA-06-1804	414	Dead	81	FEMALE	WHO IV	Untreated primary GBM	0	Unknown	Wildtype	non-codel	Methylated
TCGA-12-1096	277	Dead	55	MALE	WHO IV	Untreated primary GBM	1	1	NA	non-codel	Unmethylated
TCGA-06-0648	298	Dead	77	MALE	WHO IV	Untreated primary GBM	1	Unknown	Wildtype	non-codel	NA
TCGA-27-2528	480	Dead	62	MALE	WHO IV	Untreated primary GBM	1	1	Wildtype	non-codel	Methylated
TCGA-02-0281	121	Dead	78	FEMALE	WHO IV	Untreated primary GBM	1	Unknown	NA	non-codel	NA
TCGA-19-0957	666	Dead	48	FEMALE	WHO IV	Untreated primary GBM	1	1	Wildtype	non-codel	Unmethylated
TCGA-12-0822	715	Dead	46	MALE	WHO IV	Untreated primary GBM	1	1	Wildtype	non-codel	Methylated
TCGA-06-2562	382	Dead	81	MALE	WHO IV	Untreated primary GBM	1	1	Wildtype	non-codel	Unmethylated
TCGA-14-0813	41	Dead	78	MALE	WHO IV	Untreated primary GBM	0	0	Wildtype	non-codel	Methylated
TCGA-32-1976	15	Dead	65	MALE	WHO IV	Untreated primary GBM	0	Unknown	Wildtype	non-codel	Methylated
TCGA-28-1760	143	Alive	48	MALE	WHO IV	Untreated primary GBM	1	1	Wildtype	NA	Unmethylated
TCGA-06-6390	164	Dead	58	MALE	WHO IV	Untreated primary GBM	1	1	Wildtype	non-codel	Unmethylated
TCGA-28-5219	690	Alive	47	FEMALE	WHO IV	Untreated primary GBM	1	1	Wildtype	non-codel	Methylated
TCGA-26-1443	217	Alive	60	FEMALE	WHO IV	Untreated primary GBM	1	1	NA	non-codel	Methylated
TCGA-14-1458	203	Dead	54	MALE	WHO IV	Untreated primary GBM	1	1	Mutant	non-codel	Methylated
TCGA-12-0688	811	Dead	74	MALE	WHO IV	Untreated primary GBM	1	1	Wildtype	non-codel	NA
TCGA-14-0867	62	Dead	67	MALE	WHO IV	Untreated primary GBM	0	0	Wildtype	non-codel	Methylated
TCGA-06-0177	127	Dead	64	MALE	WHO IV	Untreated primary GBM	0	Unknown	NA	non-codel	NA
TCGA-19-1385	327	Dead	69	MALE	WHO IV	Untreated primary GBM	1	1	Wildtype	non-codel	Methylated
TCGA-06-0206	233	Dead	40	MALE	WHO IV	Untreated primary GBM	1	1	Wildtype	non-codel	NA
TCGA-12-3652	1062	Dead	60	MALE	WHO IV	Untreated primary GBM	1	1	Wildtype	non-codel	Unmethylated
TCGA-76-6664	1101	Alive	49	FEMALE	WHO IV	Untreated primary GBM	0	1	Wildtype	non-codel	Methylated
TCGA-19-0955	358	Alive	71	MALE	WHO IV	Untreated primary GBM	1	1	NA	non-codel	Methylated
TCGA-12-3650	333	Dead	46	MALE	WHO IV	Untreated primary GBM	1	1	Wildtype	non-codel	Unmethylated
TCGA-19-1790	154	Dead	56	MALE	WHO IV	Untreated primary GBM	1	1	Wildtype	NA	Unmethylated
TCGA-28-5218	157	Dead	63	MALE	WHO IV	Untreated primary GBM	1	1	Wildtype	non-codel	Unmethylated
TCGA-28-5215	335	Dead	62	FEMALE	WHO IV	Untreated primary GBM	1	1	Wildtype	non-codel	Methylated
TCGA-08-0512	1282	Dead	48	MALE	WHO IV	Untreated primary GBM	1	Unknown	NA	non-codel	NA
TCGA-06-6697	391	Alive	65	MALE	WHO IV	Untreated primary GBM	1	1	Wildtype	non-codel	Unmethylated
TCGA-26-6174	71	Alive	65	FEMALE	WHO IV	Untreated primary GBM	1	1	Wildtype	non-codel	Methylated
TCGA-14-0786	701	Dead	50	FEMALE	WHO IV	Untreated primary GBM	1	1	Wildtype	non-codel	Methylated
TCGA-16-1055	313	Dead	48	MALE	WHO IV	Untreated primary GBM	1	Unknown	NA	non-codel	Unmethylated
TCGA-19-1388	394	Dead	58	MALE	WHO IV	Untreated primary GBM	1	1	Wildtype	non-codel	Methylated
TCGA-06-0154	424	Dead	54	MALE	WHO IV	Untreated primary GBM	1	1	Wildtype	non-codel	NA
TCGA-08-0510	130	Dead	75	MALE	WHO IV	Untreated primary GBM	1	1	NA	non-codel	NA
TCGA-28-1747	77	Dead	44	MALE	WHO IV	Untreated primary GBM	1	1	Wildtype	non-codel	Methylated
TCGA-14-1821	541	Dead	31	MALE	WHO IV	Untreated primary GBM	1	1	Mutant	non-codel	Methylated
TCGA-06-0151	1417	Dead	32	FEMALE	WHO IV	GBM	1	1	Mutant	non-codel	NA
TCGA-02-0432	1433	Dead	36	MALE	WHO IV	Untreated primary GBM	1	1	NA	non-codel	NA
TCGA-06-0152	375	Dead	68	MALE	WHO IV	Untreated primary GBM	1	1	Wildtype	non-codel	NA
TCGA-02-0111	705	Dead	56	MALE	WHO IV	Untreated primary GBM	1	1	NA	non-codel	NA
TCGA-06-0159	287	Dead	74	MALE	WHO IV	GBM	1	1	Wildtype	non-codel	NA
TCGA-76-4934	77	Dead	66	FEMALE	WHO IV	Untreated primary GBM	0	Unknown	Wildtype	non-codel	Methylated
TCGA-02-0446	282	Dead	61	MALE	WHO IV	Untreated primary GBM	1	Unknown	NA	non-codel	NA
TCGA-02-0285	422	Dead	50	FEMALE	WHO IV	Untreated primary GBM	1	Unknown	NA	non-codel	NA
TCGA-06-6695	253	Alive	64	MALE	WHO IV	Untreated primary GBM	1	1	Wildtype	non-codel	Methylated
TCGA-12-0616	448	Dead	36	FEMALE	WHO IV	Untreated primary GBM	1	1	Wildtype	non-codel	NA
TCGA-06-0184	2126	Dead	63	MALE	WHO IV	Untreated primary GBM	1	1	Wildtype	non-codel	NA
TCGA-76-6282	519	Dead	63	MALE	WHO IV	Untreated primary GBM	1	1	Wildtype	non-codel	Unmethylated
TCGA-08-0350	889	Dead	32	MALE	WHO IV	Untreated primary GBM	1	1	Wildtype	non-codel	NA
TCGA-06-0122	187	Dead	84	FEMALE	WHO IV	Untreated primary GBM	Unknown	Unknown	Wildtype	non-codel	Unmethylated
TCGA-06-0882	632	Dead	30	MALE	WHO IV	Untreated primary GBM	1	1	Wildtype	non-codel	Unmethylated
TCGA-06-0238	405	Dead	46	MALE	WHO IV	Untreated primary GBM	1	Unknown	Wildtype	non-codel	NA
TCGA-06-2564	181	Alive	50	MALE	WHO IV	Untreated primary GBM	1	1	Wildtype	non-codel	Unmethylated
TCGA-06-1801	360	Dead	56	FEMALE	WHO IV	Untreated primary GBM	1	1	Wildtype	non-codel	Unmethylated
TCGA-02-0075	634	Dead	63	MALE	WHO IV	Untreated primary GBM	1	1	Wildtype	non-codel	Methylated
TCGA-19-2619	294	Alive	55	FEMALE	WHO IV	Untreated primary GBM	1	1	Wildtype	non-codel	Methylated
TCGA-4W-AA9R	124	Alive	61	MALE	WHO IV	GBM	1	Unknown	Wildtype	non-codel	Methylated
TCGA-28-5214	713	Dead	53	MALE	WHO IV	Untreated primary GBM	1	1	Wildtype	non-codel	Unmethylated
TCGA-27-1833	737	Dead	67	FEMALE	WHO IV	Untreated primary GBM	1	1	Wildtype	non-codel	Unmethylated
TCGA-06-0171	399	Dead	65	MALE	WHO IV	Untreated primary GBM	1	1	Wildtype	non-codel	NA
TCGA-02-0321	301	Dead	74	MALE	WHO IV	Untreated primary GBM	1	Unknown	NA	non-codel	NA
TCGA-41-4097	6	Dead	63	FEMALE	WHO IV	Untreated primary GBM	0	Unknown	Wildtype	non-codel	Unmethylated
TCGA-02-0330	484	Dead	51	FEMALE	WHO IV	Untreated primary GBM	1	1	NA	non-codel	NA
TCGA-32-1982	142	Dead	76	FEMALE	WHO IV	Untreated primary GBM	Unknown	1	Wildtype	non-codel	Methylated
TCGA-28-1745	345	Alive	76	MALE	WHO IV	Untreated primary GBM	1	1	Wildtype	NA	Unmethylated
TCGA-06-0189	469	Dead	55	MALE	WHO IV	Untreated primary GBM	1	Unknown	Wildtype	non-codel	NA
TCGA-12-3648	819	Dead	61	FEMALE	WHO IV	Untreated primary GBM	1	1	Wildtype	non-codel	Methylated
TCGA-02-0325	323	Dead	61	MALE	WHO IV	Untreated primary GBM	1	1	NA	non-codel	NA
TCGA-06-0150	592	Dead	45	MALE	WHO IV	GBM	1	1	Wildtype	non-codel	NA
TCGA-26-1442	953	Alive	43	MALE	WHO IV	Untreated primary GBM	1	1	Mutant	non-codel	Methylated
TCGA-76-6191	508	Dead	57	MALE	WHO IV	Untreated primary GBM	1	1	Wildtype	non-codel	Unmethylated
TCGA-28-6450	165	Dead	60	MALE	WHO IV	Untreated primary GBM	1	1	Wildtype	non-codel	Unmethylated
TCGA-06-0128	691	Dead	66	MALE	WHO IV	Untreated primary GBM	1	1	Mutant	non-codel	Methylated
TCGA-06-0187	828	Dead	69	MALE	WHO IV	Untreated primary GBM	1	Unknown	Wildtype	non-codel	NA
TCGA-06-0179	616	Dead	64	MALE	WHO IV	Untreated primary GBM	1	Unknown	NA	non-codel	NA
TCGA-14-0862	88	Dead	60	MALE	WHO IV	Untreated primary GBM	0	0	Wildtype	non-codel	Methylated
TCGA-12-1600	448	Dead	86	MALE	WHO IV	Untreated primary GBM	1	1	Wildtype	non-codel	Unmethylated
TCGA-02-0089	516	Dead	52	MALE	WHO IV	Treated primary GBM	1	1	Wildtype	non-codel	Unmethylated
TCGA-06-1800	815	Dead	61	MALE	WHO IV	Untreated primary GBM	1	1	Wildtype	non-codel	Methylated
TCGA-26-5132	286	Alive	74	MALE	WHO IV	Untreated primary GBM	1	1	Wildtype	non-codel	Methylated
TCGA-02-0115	476	Dead	52	MALE	WHO IV	Treated primary GBM	1	1	Wildtype	non-codel	Methylated
TCGA-06-0216	735	Dead	61	FEMALE	WHO IV	Untreated primary GBM	1	1	Wildtype	non-codel	NA
TCGA-19-2621	33	Dead	83	MALE	WHO IV	Untreated primary GBM	0	Unknown	Wildtype	non-codel	Methylated
TCGA-06-0149	262	Dead	74	FEMALE	WHO IV	Untreated primary GBM	1	Unknown	NA	non-codel	NA
TCGA-02-0058	254	Dead	28	FEMALE	WHO IV	Treated primary GBM	1	1	Mutant	non-codel	Methylated
TCGA-12-1095	482	Dead	65	FEMALE	WHO IV	Untreated primary GBM	1	1	NA	non-codel	Unmethylated
TCGA-06-0414	1068	Dead	63	MALE	WHO IV	Untreated primary GBM	1	1	NA	non-codel	NA
TCGA-12-0773	1315	Dead	24	MALE	WHO IV	Untreated primary GBM	1	1	Wildtype	non-codel	NA
TCGA-41-2572	406	Dead	67	MALE	WHO IV	Untreated primary GBM	1	1	Wildtype	non-codel	Unmethylated
TCGA-12-3644	1818	Dead	47	FEMALE	WHO IV	Untreated primary GBM	1	1	Wildtype	non-codel	Methylated
TCGA-14-2555	242	Alive	44	FEMALE	WHO IV	Untreated primary GBM	1	1	NA	non-codel	Methylated
TCGA-12-0819	754	Dead	49	FEMALE	WHO IV	Untreated primary GBM	1	1	Wildtype	non-codel	Methylated
TCGA-19-2623	229	Alive	65	MALE	WHO IV	Untreated primary GBM	1	1	Wildtype	non-codel	Methylated
TCGA-06-0188	1356	Dead	71	MALE	WHO IV	Untreated primary GBM	1	1	Wildtype	non-codel	NA
TCGA-27-1830	154	Dead	57	MALE	WHO IV	Untreated primary GBM	1	1	Wildtype	non-codel	Unmethylated
TCGA-06-1087	123	Dead	75	MALE	WHO IV	Untreated primary GBM	1	1	Wildtype	non-codel	Unmethylated
TCGA-06-0185	2246	Alive	54	MALE	WHO IV	Untreated primary GBM	1	1	Wildtype	non-codel	NA
CGGA_1002	305	1	43	Female	WHO III	AA	1	1	Wildtype	Non-codel	methylated
CGGA_1003	3817	0	47	Female	WHO II	O	0	1	Mutant	Codel	un-methylated
CGGA_1010	246	1	45	Male	WHO II	A	1	1	Mutant	NA	un-methylated
CGGA_1012	3679	1	45	Male	WHO II	rO	1	1	Mutant	Non-codel	un-methylated
CGGA_1014	263	1	42	Male	WHO II	A	0	1	Wildtype	Non-codel	un-methylated
CGGA_1017	768	1	29	Female	WHO IV	GBM	1	0	Wildtype	Non-codel	un-methylated
CGGA_1018	2527	1	50	Male	WHO II	rO	1	1	Mutant	Codel	methylated
CGGA_103	1188	1	56	Male	WHO III	AA	1	0	Mutant	Non-codel	un-methylated
CGGA_1030	3664	0	40	Female	WHO II	A	1	1	Mutant	Non-codel	methylated
CGGA_1032	643	1	41	Female	WHO II	A	NA	NA	Wildtype	NA	methylated
CGGA_1033	1322	0	44	Male	WHO II	OA	0	1	NA	Non-codel	un-methylated
CGGA_1036	806	1	41	Male	WHO IV	GBM	1	1	Wildtype	Non-codel	methylated
CGGA_1037	780	0	44	Male	WHO II	A	1	0	NA	Codel	methylated
CGGA_1041	3593	0	58	Male	WHO IV	GBM	1	1	Wildtype	Non-codel	un-methylated
CGGA_1048	703	0	27	Female	WHO II	A	0	1	Wildtype	Non-codel	NA
CGGA_1051	838	1	47	Male	WHO II	A	NA	NA	Wildtype	Codel	NA
CGGA_1055	1611	1	43	Male	WHO III	AA	1	1	Mutant	Non-codel	un-methylated
CGGA_1057	1549	1	57	Female	WHO II	A	1	1	Wildtype	Non-codel	un-methylated
CGGA_1058	995	1	34	Male	WHO II	rA	1	1	Mutant	Non-codel	un-methylated
CGGA_106	5028	0	30	Male	WHO II	rA	0	1	Wildtype	Non-codel	un-methylated
CGGA_1063	NA	NA	29	Male	WHO II	A	NA	NA	Mutant	NA	methylated
CGGA_1065	3412	0	48	Female	WHO II	O	1	1	Mutant	Codel	un-methylated
CGGA_1066	723	1	34	Female	WHO II	A	1	0	Mutant	Non-codel	un-methylated
CGGA_1069	NA	NA	47	Male	WHO II	rA	NA	NA	Mutant	Non-codel	methylated
CGGA_107	2156	1	38	Female	WHO III	rAA	0	0	Wildtype	Non-codel	un-methylated
CGGA_1075	398	1	72	Male	WHO IV	GBM	1	1	Wildtype	Non-codel	un-methylated
CGGA_108	366	1	44	Male	WHO III	rAA	0	1	Wildtype	Non-codel	un-methylated
CGGA_1082	NA	NA	55	Female	WHO II	A	NA	NA	Mutant	Non-codel	un-methylated
CGGA_1086	1977	1	65	Female	WHO IV	GBM	1	1	Wildtype	NA	methylated
CGGA_1087	701	0	36	Female	WHO II	O	0	1	Mutant	Codel	un-methylated
CGGA_1097	1378	1	30	Male	WHO II	A	1	1	Wildtype	Non-codel	methylated
CGGA_1100	3314	0	61	Female	WHO II	O	1	1	Mutant	NA	methylated
CGGA_1101	214	1	35	Female	WHO II	A	0	0	Wildtype	NA	un-methylated
CGGA_1103	585	1	35	Female	WHO IV	GBM	1	1	Mutant	Non-codel	methylated
CGGA_1106	420	1	37	Male	WHO IV	GBM	1	0	Wildtype	Non-codel	methylated
CGGA_1108	684	1	39	Female	WHO III	AA	1	1	Wildtype	Non-codel	un-methylated
CGGA_1111	2696	1	45	Male	WHO III	AA	1	1	Mutant	Non-codel	methylated
CGGA_112	1534	1	17	Male	WHO II	A	1	1	Mutant	Non-codel	un-methylated
CGGA_1120	422	1	58	Female	WHO III	AOA	1	1	Mutant	NA	methylated
CGGA_1121	3278	0	29	Female	WHO III	rAA	1	1	Mutant	Non-codel	methylated
CGGA_1126	784	1	44	Male	WHO III	AA	1	1	Mutant	Non-codel	methylated
CGGA_1127	2630	1	33	Male	WHO II	O	1	1	NA	Codel	un-methylated
CGGA_1130	402	1	23	Female	WHO IV	rGBM	1	0	Mutant	Non-codel	methylated
CGGA_1131	3251	0	46	Female	WHO III	AA	1	1	Mutant	Non-codel	methylated
CGGA_1132	3251	0	33	Female	WHO III	rAO	1	1	Mutant	Codel	methylated
CGGA_1134	59	1	56	Female	WHO IV	GBM	0	1	Wildtype	Non-codel	methylated
CGGA_1135	1244	1	40	Male	WHO IV	GBM	1	1	Wildtype	Non-codel	un-methylated
CGGA_1137	3237	0	58	Male	WHO III	AA	1	NA	Wildtype	NA	methylated
CGGA_1138	411	1	54	Male	WHO IV	GBM	1	1	Wildtype	Non-codel	un-methylated
CGGA_1141	432	1	65	Male	WHO III	AA	NA	NA	Wildtype	Non-codel	un-methylated
CGGA_1142	1005	1	60	Male	WHO IV	GBM	1	1	Wildtype	Non-codel	un-methylated
CGGA_1144	2505	0	39	Female	WHO III	AA	1	1	Wildtype	Non-codel	un-methylated
CGGA_1147	3215	0	36	Male	WHO II	A	0	1	Mutant	Non-codel	un-methylated
CGGA_1148	596	1	37	Male	WHO II	A	1	1	Mutant	Non-codel	un-methylated
CGGA_1152	3201	0	13	Male	WHO II	A	0	1	Wildtype	Non-codel	un-methylated
CGGA_1154	369	1	33	Female	WHO III	rAA	NA	NA	Mutant	Non-codel	un-methylated
CGGA_1155	1373	1	43	Male	WHO III	AA	1	1	Mutant	Codel	methylated
CGGA_1156	3194	0	41	Female	WHO II	A	1	1	Mutant	Non-codel	methylated
CGGA_1157	727	1	64	Male	WHO II	A	1	1	Wildtype	Non-codel	methylated
CGGA_1158	3188	0	39	Male	WHO II	O	1	1	Mutant	Codel	un-methylated
CGGA_1159	3181	0	51	Male	WHO II	A	0	1	Mutant	Non-codel	un-methylated
CGGA_1161	3180	0	36	Male	WHO III	AA	1	1	Mutant	Non-codel	un-methylated
CGGA_1162	3174	0	39	Male	WHO III	AOA	1	1	NA	Codel	un-methylated
CGGA_1164	1022	1	38	Female	WHO IV	rGBM	0	1	Mutant	Codel	un-methylated
CGGA_1169	1765	1	30	Male	WHO III	AA	1	1	Mutant	Non-codel	un-methylated
CGGA_1172	3131	0	36	Female	WHO IV	GBM	1	1	Mutant	Non-codel	methylated
CGGA_1178	422	1	41	Male	WHO III	rAA	1	1	Mutant	Non-codel	un-methylated
CGGA_1181	318	0	36	Male	WHO II	A	1	1	Mutant	Non-codel	methylated
CGGA_1183	408	1	25	Female	WHO III	AA	1	1	Wildtype	Non-codel	un-methylated
CGGA_1184	156	1	46	Male	WHO III	rAA	1	0	Mutant	Non-codel	methylated
CGGA_1185	731	1	50	Female	WHO III	rAA	1	1	Wildtype	Non-codel	un-methylated
CGGA_1191	3082	0	53	Male	WHO III	AO	0	1	Mutant	Codel	methylated
CGGA_1192	3080	0	43	Female	WHO II	A	1	1	Mutant	Non-codel	methylated
CGGA_1195	476	1	43	Male	WHO III	AA	0	0	Mutant	Non-codel	un-methylated
CGGA_1198	3066	0	30	Male	WHO II	O	0	1	Mutant	NA	un-methylated
CGGA_120	288	1	42	Male	WHO IV	rGBM	1	1	Wildtype	Non-codel	NA
CGGA_1204	3056	0	53	Male	WHO II	O	0	1	Mutant	Codel	methylated
CGGA_1205	929	1	59	Female	WHO III	AA	1	1	Wildtype	NA	un-methylated
CGGA_1207	3049	0	49	Female	WHO III	AOA	0	1	NA	Codel	methylated
CGGA_1208	161	1	38	Male	WHO IV	rGBM	1	1	Wildtype	Non-codel	un-methylated
CGGA_1211	3042	0	40	Male	WHO II	O	0	0	Mutant	Codel	un-methylated
CGGA_1212	2292	1	31	Male	WHO III	AA	1	1	Mutant	Non-codel	methylated
CGGA_1223	682	1	42	Male	WHO III	AA	1	1	Wildtype	Non-codel	un-methylated
CGGA_1226	670	1	33	Female	WHO II	A	1	1	Wildtype	Non-codel	un-methylated
CGGA_1228	2626	0	34	Male	WHO II	A	0	1	Wildtype	Non-codel	NA
CGGA_1232	2067	1	39	Male	WHO III	AA	1	1	Mutant	Non-codel	methylated
CGGA_1235	3004	0	32	Female	WHO III	AO	0	0	Mutant	Non-codel	methylated
CGGA_1236	191	1	47	Female	WHO IV	GBM	0	0	Wildtype	Non-codel	methylated
CGGA_1238	2996	0	11	Female	WHO II	A	0	0	Wildtype	Non-codel	un-methylated
CGGA_1239	2997	0	44	Female	WHO II	O	1	NA	Mutant	Codel	methylated
CGGA_1248	138	1	54	Male	WHO IV	rGBM	1	1	Wildtype	Non-codel	un-methylated
CGGA_1255	118	1	49	Male	WHO IV	rGBM	1	1	Wildtype	Non-codel	methylated
CGGA_1256	2557	0	52	Female	WHO IV	GBM	1	1	NA	Non-codel	methylated
CGGA_1257	192	1	59	Male	WHO IV	rGBM	1	1	Wildtype	Non-codel	un-methylated
CGGA_1260	177	1	32	Male	WHO IV	rGBM	1	1	Wildtype	Non-codel	un-methylated
CGGA_1262	166	1	69	Female	WHO IV	rGBM	1	0	Wildtype	NA	methylated
CGGA_1264	2929	0	37	Female	WHO III	AO	0	1	Mutant	Codel	methylated
CGGA_1269	2923	0	35	Female	WHO III	AO	0	1	Mutant	Codel	methylated
CGGA_1273	2438	0	64	Male	WHO III	rAA	1	1	Mutant	Non-codel	un-methylated
CGGA_1282	1116	1	33	Female	WHO IV	GBM	1	1	Wildtype	Non-codel	un-methylated
CGGA_1286	2906	0	52	Female	WHO II	O	1	1	Mutant	Codel	un-methylated
CGGA_1291	2422	0	41	Male	WHO III	AO	1	1	NA	Codel	un-methylated
CGGA_1295	310	1	40	Male	WHO III	rAA	1	1	Mutant	Non-codel	methylated
CGGA_1300	1793	1	35	Male	WHO III	AA	1	1	Mutant	Non-codel	methylated
CGGA_1303	2861	0	45	Female	WHO III	AOA	1	1	Mutant	NA	methylated
CGGA_1305	2702	1	43	Male	WHO III	AA	1	1	Mutant	Non-codel	methylated
CGGA_1309	964	0	65	Male	WHO III	AO	0	0	NA	Codel	methylated
CGGA_1311	1080	1	29	Female	WHO III	rAO	1	1	Mutant	Codel	methylated
CGGA_1317	2864	0	45	Male	WHO II	OA	0	0	Mutant	NA	methylated
CGGA_1318	1497	0	39	Male	WHO II	A	1	0	Mutant	Non-codel	methylated
CGGA_1319	2861	0	42	Female	WHO III	AO	1	1	Wildtype	Non-codel	methylated
CGGA_1321	702	1	46	Male	WHO III	AA	1	1	Mutant	Non-codel	methylated
CGGA_1325	NA	NA	20	Male	WHO IV	rGBM	0	0	Wildtype	NA	un-methylated
CGGA_1326	322	1	45	Male	WHO IV	GBM	1	0	Mutant	Non-codel	un-methylated
CGGA_1334	146	1	33	Female	WHO II	A	1	1	Wildtype	Non-codel	methylated
CGGA_1335	2839	0	43	Female	WHO II	O	0	0	Mutant	Codel	un-methylated
CGGA_1337	2172	1	67	Male	WHO IV	rGBM	1	1	NA	Non-codel	un-methylated
CGGA_1339	2832	0	41	Male	WHO II	O	0	1	Mutant	Codel	un-methylated
CGGA_1345	2825	0	56	Male	WHO II	O	1	1	Mutant	Codel	methylated
CGGA_135	1924	1	41	Female	WHO III	AA	1	0	Wildtype	Non-codel	un-methylated
CGGA_1350	2819	0	36	Male	WHO II	O	0	0	Mutant	NA	methylated
CGGA_1353	1022	1	65	Male	WHO IV	GBM	1	1	Wildtype	Non-codel	un-methylated
CGGA_1354	530	1	40	Female	WHO IV	GBM	1	1	Wildtype	Non-codel	methylated
CGGA_1356	948	1	52	Male	WHO III	rAA	1	1	Mutant	Non-codel	methylated
CGGA_1359	343	1	21	Male	WHO III	rAA	1	1	Wildtype	Non-codel	methylated
CGGA_1361	2804	0	40	Male	WHO II	O	1	1	Mutant	Non-codel	methylated
CGGA_1362	2804	0	64	Female	WHO III	AA	1	1	Wildtype	Non-codel	un-methylated
CGGA_1365	253	1	55	Male	WHO IV	GBM	1	1	Wildtype	NA	methylated
CGGA_1368	2797	0	49	Male	WHO II	O	1	0	Mutant	NA	methylated
CGGA_1369	360	0	37	Female	WHO III	AO	1	1	Mutant	Non-codel	methylated
CGGA_1371	2791	0	68	Male	WHO IV	GBM	1	1	Wildtype	Non-codel	methylated
CGGA_1377	2780	0	28	Male	WHO III	AA	1	1	Mutant	Non-codel	methylated
CGGA_1378	378	1	47	Male	WHO IV	GBM	1	1	Wildtype	NA	un-methylated
CGGA_1380	291	1	46	Male	WHO IV	GBM	1	1	Wildtype	Non-codel	methylated
CGGA_1382	284	1	57	Male	WHO IV	GBM	1	1	Wildtype	Non-codel	methylated
CGGA_1383	884	0	47	Female	WHO III	rAA	1	0	Mutant	Codel	methylated
CGGA_1386	2770	0	34	Male	WHO III	AO	0	1	NA	Codel	methylated
CGGA_1387	90	1	41	Male	WHO IV	rGBM	0	0	Wildtype	Non-codel	methylated
CGGA_1389	1669	1	67	Female	WHO III	AO	1	0	Mutant	Codel	methylated
CGGA_139	694	1	59	Male	WHO IV	GBM	1	1	Mutant	Non-codel	un-methylated
CGGA_1390	2050	0	50	Male	WHO III	rAA	1	1	Mutant	Non-codel	un-methylated
CGGA_1391	426	0	62	Male	WHO IV	GBM	1	1	Wildtype	Non-codel	un-methylated
CGGA_1392	473	1	62	Male	WHO IV	GBM	1	1	Wildtype	Non-codel	un-methylated
CGGA_1398	554	1	43	Male	WHO III	rAA	1	1	Mutant	Non-codel	methylated
CGGA_1400	2742	0	53	Female	WHO III	rAO	1	1	NA	Codel	un-methylated
CGGA_1401	1680	1	39	Male	WHO III	AA	1	1	Mutant	Non-codel	methylated
CGGA_1402	2742	0	30	Male	WHO IV	GBM	1	1	Wildtype	Non-codel	methylated
CGGA_1403	679	1	43	Female	WHO IV	GBM	1	1	Wildtype	Non-codel	methylated
CGGA_1404	2741	0	56	Female	WHO III	AO	1	1	Mutant	Codel	methylated
CGGA_1407	2728	0	29	Female	WHO III	AO	0	0	Mutant	Codel	methylated
CGGA_1410	825	1	27	Female	WHO IV	GBM	1	1	Wildtype	Non-codel	methylated
CGGA_1413	2720	0	35	Male	WHO III	AO	1	1	Mutant	Codel	methylated
CGGA_1415	2719	0	30	Female	WHO IV	rGBM	1	1	Wildtype	Non-codel	methylated
CGGA_1416	1933	1	42	Male	WHO III	AO	0	0	Mutant	Codel	un-methylated
CGGA_1417	2713	0	56	Male	WHO III	AO	1	1	Mutant	Codel	methylated
CGGA_1418	287	1	73	Female	WHO IV	GBM	1	1	Wildtype	NA	un-methylated
CGGA_1419	249	1	56	Male	WHO IV	rGBM	1	1	Wildtype	Non-codel	un-methylated
CGGA_1420	364	1	60	Male	WHO IV	GBM	1	1	Wildtype	Non-codel	methylated
CGGA_1421	2699	0	35	Male	WHO III	AO	1	1	NA	Non-codel	methylated
CGGA_1422	204	1	76	Male	WHO IV	GBM	1	1	Wildtype	NA	un-methylated
CGGA_1424	2692	0	41	Female	WHO III	AO	1	1	Mutant	NA	methylated
CGGA_1425	640	1	22	Female	WHO IV	GBM	1	1	Wildtype	Codel	methylated
CGGA_1426	133	1	50	Female	WHO IV	GBM	1	1	Wildtype	Non-codel	un-methylated
CGGA_1427	339	0	30	Female	WHO II	OA	1	0	NA	Non-codel	un-methylated
CGGA_1429	2685	0	40	Female	WHO IV	rGBM	1	1	Mutant	Codel	methylated
CGGA_1430	162	1	28	Female	WHO IV	rGBM	1	1	Wildtype	Non-codel	un-methylated
CGGA_1431	2048	1	48	Male	WHO III	AA	0	0	Mutant	Non-codel	methylated
CGGA_1433	394	1	72	Female	WHO IV	GBM	1	1	Wildtype	Non-codel	un-methylated
CGGA_1434	67	1	61	Male	WHO III	rAA	1	1	Wildtype	Non-codel	un-methylated
CGGA_1435	1657	1	46	Female	WHO III	AA	1	0	Mutant	Non-codel	un-methylated
CGGA_1437	1037	1	48	Male	WHO III	rAA	1	1	Wildtype	Non-codel	un-methylated
CGGA_1440	2670	0	29	Female	WHO II	O	0	1	Mutant	Codel	methylated
CGGA_1441	1882	1	70	Male	WHO IV	GBM	1	1	Wildtype	Non-codel	methylated
CGGA_1443	2665	0	41	Male	WHO II	rA	1	0	Wildtype	Non-codel	NA
CGGA_1444	378	1	68	Female	WHO IV	GBM	1	1	Wildtype	Non-codel	methylated
CGGA_1445	2664	0	37	Male	WHO III	rAA	0	1	Wildtype	NA	methylated
CGGA_1446	2664	0	29	Male	WHO II	OA	0	1	Mutant	NA	un-methylated
CGGA_1447	308	1	48	Male	WHO III	rAA	1	1	Wildtype	NA	methylated
CGGA_1451	438	1	45	Female	WHO IV	GBM	1	1	Wildtype	Non-codel	un-methylated
CGGA_1452	468	1	53	Male	WHO IV	GBM	1	1	Wildtype	Non-codel	methylated
CGGA_1454	2655	0	42	Female	WHO II	A	1	1	Wildtype	Non-codel	methylated
CGGA_1455	2655	0	40	Male	WHO II	O	0	0	Mutant	NA	un-methylated
CGGA_1457	312	1	60	Male	WHO IV	GBM	1	1	Wildtype	Non-codel	methylated
CGGA_1458	127	1	54	Female	WHO III	rAO	1	1	Mutant	Codel	methylated
CGGA_1459	503	1	55	Male	WHO III	rAA	1	1	Wildtype	Non-codel	un-methylated
CGGA_1461	226	1	60	Female	WHO IV	GBM	1	1	Wildtype	Non-codel	un-methylated
CGGA_1462	174	1	49	Male	WHO IV	GBM	1	1	Wildtype	Non-codel	methylated
CGGA_1463	2633	0	69	Female	WHO II	O	1	0	Mutant	Codel	methylated
CGGA_1467	866	1	58	Male	WHO IV	GBM	1	0	Mutant	NA	un-methylated
CGGA_1469	2626	0	46	Male	WHO III	AOA	1	1	Mutant	NA	methylated
CGGA_1471	2623	0	45	Male	WHO II	A	1	1	Mutant	Non-codel	methylated
CGGA_1472	1025	1	34	Male	WHO IV	GBM	0	0	NA	Non-codel	methylated
CGGA_1473	265	1	28	Female	WHO III	rAA	1	0	NA	Non-codel	un-methylated
CGGA_1474	333	0	50	Female	WHO III	AO	1	1	Mutant	NA	methylated
CGGA_1476	299	1	53	Female	WHO IV	GBM	0	0	Wildtype	Non-codel	methylated
CGGA_1477	1194	1	43	Male	WHO II	OA	1	0	NA	Non-codel	un-methylated
CGGA_1478	542	1	72	Female	WHO IV	GBM	1	1	Wildtype	Non-codel	methylated
CGGA_1480	405	1	41	Male	WHO IV	rGBM	1	1	Wildtype	Non-codel	methylated
CGGA_1481	131	1	55	Male	WHO IV	GBM	0	0	Wildtype	NA	methylated
CGGA_1482	2592	0	38	Male	WHO III	AO	1	1	NA	Codel	methylated
CGGA_1486	184	1	45	Male	WHO IV	GBM	1	1	Wildtype	NA	methylated
CGGA_1487	520	1	49	Female	WHO III	rAA	1	1	Wildtype	Non-codel	un-methylated
CGGA_1488	2586	0	31	Male	WHO II	A	0	0	Mutant	Non-codel	methylated
CGGA_1491	246	1	29	Male	WHO IV	GBM	1	1	Mutant	Non-codel	un-methylated
CGGA_1492	268	1	47	Female	WHO IV	rGBM	0	0	Wildtype	Non-codel	un-methylated
CGGA_1494	269	1	21	Male	WHO IV	GBM	1	1	Wildtype	NA	methylated
CGGA_1496	330	1	42	Female	WHO IV	rGBM	1	1	Mutant	Codel	methylated
CGGA_1497	1178	1	24	Female	WHO III	AA	1	1	Mutant	Non-codel	un-methylated
CGGA_1498	NA	NA	69	Male	WHO IV	GBM	NA	NA	Wildtype	NA	un-methylated
CGGA_1500	108	1	45	Female	WHO IV	GBM	1	1	Wildtype	Non-codel	un-methylated
CGGA_1501	222	1	58	Male	WHO IV	GBM	1	1	NA	Non-codel	methylated
CGGA_1502	2565	0	27	Female	WHO II	O	0	0	Mutant	Codel	methylated
CGGA_1503	777	1	47	Male	WHO IV	GBM	1	1	Wildtype	NA	un-methylated
CGGA_1504	2558	0	44	Female	WHO III	AA	1	1	Mutant	Non-codel	methylated
CGGA_1505	172	1	30	Male	WHO IV	rGBM	1	1	Mutant	Non-codel	un-methylated
CGGA_1507	715	1	41	Female	WHO IV	rGBM	1	1	Wildtype	Non-codel	un-methylated
CGGA_1508	1049	1	39	Male	WHO III	AA	0	0	Mutant	Non-codel	methylated
CGGA_1510	271	1	40	Male	WHO III	rAA	1	1	Mutant	Non-codel	methylated
CGGA_1513	2352	1	36	Female	WHO III	rAO	1	1	Mutant	Codel	methylated
CGGA_1514	76	1	57	Female	WHO II	A	0	0	Wildtype	NA	methylated
CGGA_1516	2530	0	46	Male	WHO II	O	1	1	Mutant	Codel	methylated
CGGA_1517	2530	0	42	Male	WHO II	O	1	1	Mutant	Codel	methylated
CGGA_1518	411	1	19	Female	WHO III	AA	1	1	Wildtype	Non-codel	methylated
CGGA_1520	297	1	67	Female	WHO IV	rGBM	1	1	Wildtype	Non-codel	NA
CGGA_1521	205	1	63	Female	WHO IV	GBM	1	1	Wildtype	Non-codel	methylated
CGGA_1523	2508	0	50	Male	WHO II	A	1	1	Mutant	Non-codel	methylated
CGGA_1524	1004	1	36	Male	WHO III	rAO	1	1	Mutant	Codel	methylated
CGGA_1525	1686	1	41	Male	WHO III	AOA	1	1	NA	Non-codel	methylated
CGGA_1526	2502	0	39	Male	WHO III	AO	1	1	Mutant	Codel	methylated
CGGA_1527	1714	1	47	Male	WHO III	AA	1	1	Mutant	Non-codel	methylated
CGGA_1528	2497	0	27	Female	WHO II	O	1	1	Mutant	Codel	methylated
CGGA_1529	583	1	63	Male	WHO IV	GBM	NA	NA	Wildtype	Non-codel	un-methylated
CGGA_1530	2497	0	41	Male	WHO III	AOA	0	1	NA	Non-codel	un-methylated
CGGA_1531	NA	NA	36	Male	WHO III	AA	NA	NA	Mutant	Non-codel	methylated
CGGA_1533	1217	1	61	Female	WHO III	rAA	1	1	Wildtype	Non-codel	methylated
CGGA_1534	27	1	58	Female	WHO IV	GBM	0	0	Mutant	Non-codel	un-methylated
CGGA_1535	232	1	43	Male	WHO IV	rGBM	1	1	Mutant	Non-codel	un-methylated
CGGA_1536	840	1	53	Male	WHO II	A	0	0	Mutant	Non-codel	methylated
CGGA_1537	97	1	73	Male	WHO IV	GBM	0	0	Wildtype	Non-codel	methylated
CGGA_1538	247	1	57	Female	WHO IV	rGBM	1	1	Wildtype	Non-codel	methylated
CGGA_1539	2462	0	61	Male	WHO IV	GBM	1	1	Mutant	Non-codel	methylated
CGGA_1541	67	1	50	Female	WHO IV	rGBM	1	1	Wildtype	Non-codel	methylated
CGGA_1542	184	0	26	Male	WHO IV	GBM	1	1	Mutant	NA	un-methylated
CGGA_1543	723	1	57	Male	WHO IV	GBM	1	0	Mutant	Non-codel	un-methylated
CGGA_1544	208	1	38	Female	WHO III	AA	0	0	Mutant	Non-codel	methylated
CGGA_1546	223	1	56	Male	WHO IV	GBM	0	1	Wildtype	Non-codel	un-methylated
CGGA_1548	1054	1	53	Male	WHO IV	GBM	1	1	Wildtype	Non-codel	un-methylated
CGGA_1551	347	1	50	Female	WHO IV	GBM	1	1	NA	Non-codel	un-methylated
CGGA_1552	2432	0	39	Male	WHO III	AO	1	0	Mutant	Codel	methylated
CGGA_1553	540	1	30	Male	WHO III	rAA	1	1	Mutant	Non-codel	un-methylated
CGGA_1554	824	1	34	Male	WHO III	rAO	1	1	Mutant	Codel	methylated
CGGA_1557	2427	0	47	Male	WHO III	AO	0	1	Mutant	Codel	methylated
CGGA_1558	130	1	71	Male	WHO IV	rGBM	1	1	Wildtype	Non-codel	methylated
CGGA_1559	603	1	63	Male	WHO IV	GBM	0	1	Mutant	Codel	methylated
CGGA_1560	459	1	35	Female	WHO IV	GBM	1	1	Mutant	Non-codel	methylated
CGGA_1562	2032	1	51	Male	WHO III	AO	1	1	Mutant	Codel	methylated
CGGA_1563	2423	0	32	Female	WHO II	A	1	1	Wildtype	Non-codel	methylated
CGGA_1564	190	1	48	Male	WHO IV	GBM	1	1	Wildtype	Non-codel	un-methylated
CGGA_1565	1417	0	23	Female	WHO III	AA	0	0	Mutant	Non-codel	methylated
CGGA_1566	2420	0	43	Female	WHO III	AO	1	1	Mutant	Codel	methylated
CGGA_1567	840	1	48	Female	WHO III	AO	1	1	Mutant	Non-codel	methylated
CGGA_1568	345	0	26	Female	WHO III	AA	0	0	NA	Non-codel	methylated
CGGA_1569	1406	0	27	Female	WHO III	AA	0	0	Wildtype	Codel	methylated
CGGA_157	914	1	34	Male	WHO II	rA	1	1	NA	Non-codel	un-methylated
CGGA_1571	412	0	43	Female	WHO IV	GBM	1	1	Mutant	Non-codel	methylated
CGGA_1572	160	1	60	Female	WHO IV	rGBM	1	1	Wildtype	Non-codel	un-methylated
CGGA_1575	129	1	37	Male	WHO III	rAA	1	0	Mutant	Non-codel	methylated
CGGA_1579	2398	0	37	Male	WHO II	A	0	0	Wildtype	Non-codel	methylated
CGGA_1580	1581	1	34	Female	WHO III	AA	1	1	Mutant	Non-codel	un-methylated
CGGA_1583	1606	1	51	Female	WHO II	OA	1	0	NA	Non-codel	methylated
CGGA_1586	232	1	55	Female	WHO IV	GBM	1	1	Wildtype	Non-codel	un-methylated
CGGA_1587	750	1	30	Female	WHO III	AA	0	0	Mutant	Non-codel	methylated
CGGA_1588	2003	0	24	Female	WHO III	AA	0	0	Wildtype	Non-codel	methylated
CGGA_1589	342	1	49	Male	WHO II	rA	1	1	Wildtype	Non-codel	methylated
CGGA_1591	1133	1	54	Male	WHO III	rAA	1	0	Mutant	Non-codel	methylated
CGGA_1592	1588	1	37	Male	WHO III	rAO	1	1	Mutant	Codel	methylated
CGGA_1594	480	0	25	Male	WHO II	rA	0	1	NA	Non-codel	methylated
CGGA_1595	2363	0	34	Female	WHO IV	GBM	1	1	NA	Non-codel	un-methylated
CGGA_1596	205	1	63	Male	WHO IV	GBM	1	1	Wildtype	Non-codel	methylated
CGGA_1597	174	1	58	Male	WHO IV	GBM	1	0	Wildtype	Non-codel	methylated
CGGA_1598	564	1	31	Male	WHO III	AA	1	1	Wildtype	Non-codel	un-methylated
CGGA_1601	710	1	66	Male	WHO IV	GBM	1	1	Wildtype	Non-codel	methylated
CGGA_1603	356	1	18	Male	WHO IV	rGBM	1	1	Wildtype	Non-codel	un-methylated
CGGA_1604	740	1	46	Male	WHO IV	rGBM	1	1	Mutant	Non-codel	methylated
CGGA_1605	321	1	34	Male	WHO IV	rGBM	1	1	Wildtype	Non-codel	methylated
CGGA_1606	471	1	28	Female	WHO III	AA	1	1	Wildtype	Non-codel	un-methylated
CGGA_1607	1333	1	35	Female	WHO II	rO	1	1	Mutant	Codel	methylated
CGGA_1608	1953	0	38	Male	WHO III	rAA	1	0	Mutant	Non-codel	methylated
CGGA_1610	1058	1	39	Male	WHO III	rAOA	1	1	NA	Codel	methylated
CGGA_1611	1158	1	30	Female	WHO IV	rGBM	1	1	Mutant	Non-codel	un-methylated
CGGA_1612	718	1	68	Male	WHO IV	GBM	1	1	Wildtype	Non-codel	un-methylated
CGGA_1613	250	0	53	Male	WHO IV	GBM	1	1	Wildtype	Non-codel	methylated
CGGA_1614	1079	1	51	Male	WHO III	rAA	1	1	Mutant	Non-codel	methylated
CGGA_1615	586	1	48	Male	WHO IV	rGBM	1	1	Wildtype	Codel	un-methylated
CGGA_1617	2310	0	35	Female	WHO II	O	1	0	NA	Codel	methylated
CGGA_1618	2319	0	31	Male	WHO III	AA	1	1	Mutant	Non-codel	un-methylated
CGGA_1619	766	1	44	Male	WHO III	AA	1	1	Mutant	Non-codel	methylated
CGGA_1620	2312	0	51	Male	WHO III	AO	1	1	Mutant	Codel	methylated
CGGA_1621	2311	0	48	Female	WHO II	A	1	1	Mutant	Non-codel	un-methylated
CGGA_1623	2307	0	16	Female	WHO III	AA	1	0	Wildtype	Non-codel	methylated
CGGA_1624	87	1	27	Female	WHO IV	rGBM	1	1	Mutant	Non-codel	methylated
CGGA_1626	696	1	66	Male	WHO IV	GBM	1	1	Wildtype	Non-codel	un-methylated
CGGA_1627	2301	0	37	Male	WHO III	AA	1	1	Mutant	Non-codel	un-methylated
CGGA_1630	2160	0	26	Male	WHO II	O	0	0	NA	Codel	un-methylated
CGGA_1631	221	1	58	Female	WHO IV	rGBM	1	0	Wildtype	Non-codel	methylated
CGGA_1634	366	1	26	Female	WHO IV	GBM	0	0	Wildtype	Non-codel	methylated
CGGA_1635	332	1	43	Female	WHO IV	GBM	1	1	Wildtype	NA	un-methylated
CGGA_1640	2267	0	55	Male	WHO III	AOA	1	1	NA	Non-codel	un-methylated
CGGA_1641	291	1	57	Female	WHO IV	rGBM	1	1	Wildtype	Non-codel	methylated
CGGA_1642	2266	0	48	Male	WHO II	A	1	0	Mutant	Non-codel	methylated
CGGA_1643	NA	NA	50	Female	WHO IV	GBM	NA	NA	Wildtype	Non-codel	un-methylated
CGGA_1644	173	1	48	Male	WHO IV	GBM	1	1	Wildtype	Non-codel	methylated
CGGA_1645	1996	0	59	Male	WHO III	AA	1	1	Mutant	Non-codel	methylated
CGGA_1647	2229	0	40	Male	WHO II	O	1	0	NA	Codel	methylated
CGGA_1648	1747	0	45	Female	WHO III	AOA	1	1	NA	Codel	un-methylated
CGGA_1649	2225	0	36	Male	WHO II	O	1	1	Mutant	Codel	un-methylated
CGGA_165	183	0	34	Male	WHO II	A	1	0	NA	Non-codel	un-methylated
CGGA_1650	1283	1	36	Male	WHO IV	GBM	1	1	Mutant	Non-codel	methylated
CGGA_1651	842	1	44	Female	WHO II	rA	1	1	Mutant	Non-codel	methylated
CGGA_1653	2217	0	47	Female	WHO II	OA	1	0	NA	Non-codel	methylated
CGGA_1654	NA	NA	61	Male	WHO IV	GBM	NA	NA	Wildtype	Non-codel	methylated
CGGA_1655	1209	0	48	Male	WHO II	A	1	0	Mutant	Non-codel	un-methylated
CGGA_1656	149	1	56	Male	WHO IV	rGBM	0	1	Wildtype	Non-codel	methylated
CGGA_1657	2215	0	20	Female	WHO III	AOA	0	0	NA	Non-codel	methylated
CGGA_1658	1574	1	64	Female	WHO IV	rGBM	1	1	Wildtype	Non-codel	un-methylated
CGGA_1659	387	1	24	Male	WHO IV	rGBM	1	1	Wildtype	Non-codel	methylated
CGGA_1660	NA	NA	41	Male	WHO II	A	1	1	Wildtype	Codel	methylated
CGGA_1661	2209	0	42	Female	WHO III	AA	1	1	NA	Non-codel	methylated
CGGA_1662	1493	0	55	Female	WHO II	O	1	0	Mutant	Codel	methylated
CGGA_1663	290	1	61	Male	WHO IV	rGBM	1	1	Wildtype	Non-codel	NA
CGGA_1664	1528	1	40	Female	WHO II	O	1	1	Mutant	Non-codel	methylated
CGGA_1666	249	1	60	Male	WHO IV	GBM	1	1	Wildtype	NA	methylated
CGGA_1667	2180	0	40	Female	WHO III	AO	1	1	Mutant	Codel	un-methylated
CGGA_1669	139	1	44	Female	WHO III	AA	0	0	Wildtype	Non-codel	methylated
CGGA_1670	365	1	30	Female	WHO III	rAA	1	1	Wildtype	Non-codel	methylated
CGGA_1671	2168	0	26	Female	WHO III	AA	1	1	Mutant	Non-codel	un-methylated
CGGA_1672	NA	NA	49	Female	WHO III	AOA	NA	NA	NA	Non-codel	methylated
CGGA_1673	2160	0	23	Female	WHO II	A	0	1	Mutant	Non-codel	methylated
CGGA_1675	2154	0	38	Male	WHO III	AA	1	1	Mutant	Non-codel	methylated
CGGA_1677	NA	NA	39	Female	WHO II	A	NA	NA	NA	Non-codel	methylated
CGGA_1678	657	1	51	Male	WHO IV	GBM	1	1	Wildtype	NA	methylated
CGGA_1679	2146	0	52	Female	WHO III	AO	1	1	Mutant	Codel	methylated
CGGA_1680	596	1	45	Male	WHO III	AA	1	1	Mutant	Non-codel	methylated
CGGA_1681	346	1	58	Female	WHO IV	GBM	1	1	Wildtype	Codel	methylated
CGGA_1682	345	1	67	Male	WHO IV	rGBM	1	1	Wildtype	Non-codel	methylated
CGGA_1684	NA	NA	51	Male	WHO IV	GBM	NA	NA	Wildtype	Non-codel	methylated
CGGA_1685	225	1	33	Male	WHO III	rAA	1	1	Mutant	Non-codel	methylated
CGGA_1686	745	1	27	Male	WHO III	AA	0	1	Wildtype	Non-codel	un-methylated
CGGA_1687	2118	0	14	Male	WHO IV	GBM	1	1	Wildtype	Non-codel	un-methylated
CGGA_1688	51	1	51	Female	WHO III	rAA	1	1	Wildtype	Non-codel	methylated
CGGA_1689	2118	0	45	Male	WHO II	A	1	1	Mutant	Non-codel	methylated
CGGA_1690	592	1	60	Male	WHO IV	GBM	1	1	Wildtype	Non-codel	un-methylated
CGGA_1693	517	1	61	Male	WHO III	AO	1	1	NA	Non-codel	un-methylated
CGGA_1694	624	1	55	Male	WHO IV	GBM	1	1	Wildtype	Non-codel	un-methylated
CGGA_1695	2094	0	45	Male	WHO III	rAA	1	1	Mutant	Non-codel	un-methylated
CGGA_1696	1205	0	72	Male	WHO III	AA	1	1	Wildtype	NA	un-methylated
CGGA_1697	89	1	47	Female	WHO IV	rGBM	1	1	Wildtype	Non-codel	methylated
CGGA_1698	388	1	55	Female	WHO IV	GBM	0	0	Wildtype	Non-codel	methylated
CGGA_1699	2088	0	41	Female	WHO IV	GBM	0	1	Mutant	NA	un-methylated
CGGA_1700	2076	0	49	Male	WHO III	AO	1	1	Mutant	Codel	un-methylated
CGGA_1701	1696	0	44	Male	WHO III	AO	1	0	Mutant	Codel	methylated
CGGA_1702	168	1	29	Female	WHO IV	rGBM	1	1	Wildtype	Non-codel	un-methylated
CGGA_1703	1592	0	30	Female	WHO II	A	1	1	Mutant	Non-codel	un-methylated
CGGA_1704	2064	0	32	Female	WHO II	A	1	0	Wildtype	Non-codel	un-methylated
CGGA_1706	2068	0	60	Male	WHO IV	GBM	1	1	Wildtype	Non-codel	NA
CGGA_1708	1122	1	54	Female	WHO IV	GBM	1	1	Wildtype	Non-codel	methylated
CGGA_1709	415	1	47	Male	WHO IV	GBM	1	1	Wildtype	Non-codel	un-methylated
CGGA_1713	332	1	62	Male	WHO IV	GBM	1	1	Wildtype	Non-codel	methylated
CGGA_1714	2034	0	37	Female	WHO III	AOA	1	1	NA	Codel	un-methylated
CGGA_1715	2033	0	12	Female	WHO II	O	0	0	Wildtype	Non-codel	methylated
CGGA_1716	951	1	38	Male	WHO III	rAA	1	1	Mutant	Non-codel	methylated
CGGA_1718	1996	0	37	Female	WHO III	AA	1	1	Mutant	Non-codel	methylated
CGGA_1720	1994	0	35	Male	WHO II	A	1	1	Mutant	Non-codel	methylated
CGGA_1721	1994	0	46	Female	WHO III	AO	1	1	NA	Codel	un-methylated
CGGA_1722	349	1	60	Female	WHO IV	GBM	1	1	Wildtype	NA	un-methylated
CGGA_1723	1986	0	39	Female	WHO III	AO	1	1	Mutant	Codel	un-methylated
CGGA_1725	1983	0	33	Female	WHO III	AO	1	1	Mutant	Codel	un-methylated
CGGA_1727	1980	0	48	Male	WHO IV	GBM	1	1	Mutant	Non-codel	un-methylated
CGGA_1728	917	1	45	Male	WHO IV	GBM	1	1	Mutant	Non-codel	un-methylated
CGGA_1729	244	1	52	Male	WHO IV	rGBM	1	1	Wildtype	Non-codel	methylated
CGGA_1731	1976	0	45	Female	WHO III	AA	1	1	Mutant	Non-codel	methylated
CGGA_1735	813	1	54	Male	WHO IV	GBM	1	1	Wildtype	Non-codel	un-methylated
CGGA_1736	938	1	57	Female	WHO IV	GBM	1	1	Wildtype	Non-codel	un-methylated
CGGA_1737	1952	0	33	Male	WHO III	AO	1	1	Mutant	Codel	methylated
CGGA_1738	469	1	49	Male	WHO III	AA	1	1	Wildtype	Non-codel	methylated
CGGA_1739	515	1	45	Male	WHO III	rAA	1	1	Mutant	Non-codel	un-methylated
CGGA_1740	363	1	50	Female	WHO IV	GBM	0	0	Wildtype	Non-codel	methylated
CGGA_1743	1361	1	47	Female	WHO III	AA	1	1	Mutant	Non-codel	un-methylated
CGGA_1744	1936	0	51	Male	WHO IV	GBM	1	1	NA	Non-codel	methylated
CGGA_1745	1929	0	45	Female	WHO III	AOA	1	0	Mutant	NA	methylated
CGGA_1747	293	1	27	Female	WHO III	AOA	1	1	NA	Non-codel	un-methylated
CGGA_1749	401	1	44	Female	WHO IV	GBM	1	1	Wildtype	Non-codel	un-methylated
CGGA_1750	250	1	52	Female	WHO IV	GBM	1	1	Wildtype	Non-codel	methylated
CGGA_1758	414	1	45	Female	WHO IV	GBM	1	1	Wildtype	Non-codel	methylated
CGGA_1760	459	1	51	Male	WHO II	rA	0	1	Wildtype	Non-codel	un-methylated
CGGA_1764	710	1	33	Male	WHO IV	GBM	1	1	Mutant	Non-codel	un-methylated
CGGA_1767	86	1	63	Male	WHO IV	GBM	0	0	Wildtype	NA	methylated
CGGA_1769	1854	0	49	Female	WHO IV	GBM	0	1	Wildtype	Non-codel	methylated
CGGA_1770	267	1	43	Female	WHO IV	rGBM	0	1	Mutant	Non-codel	un-methylated
CGGA_1771	1068	1	38	Male	WHO III	rAA	1	1	Mutant	Non-codel	un-methylated
CGGA_1773	104	1	46	Female	WHO IV	rGBM	1	1	Wildtype	Non-codel	un-methylated
CGGA_1776	259	1	23	Male	WHO IV	rGBM	1	1	Wildtype	Non-codel	un-methylated
CGGA_1780	1826	0	57	Female	WHO IV	GBM	0	1	Wildtype	NA	NA
CGGA_1785	329	1	34	Male	WHO IV	rGBM	1	1	Mutant	Non-codel	methylated
CGGA_1786	1817	0	54	Female	WHO III	rAO	1	1	Mutant	Codel	NA
CGGA_1791	855	1	55	Male	WHO III	AA	1	1	Wildtype	NA	un-methylated
CGGA_1807	247	1	65	Female	WHO IV	GBM	NA	NA	Wildtype	Non-codel	methylated
CGGA_1809	343	1	27	Male	WHO III	AO	1	1	Wildtype	Non-codel	un-methylated
CGGA_1811	304	1	64	Male	WHO IV	rGBM	1	1	Wildtype	Non-codel	NA
CGGA_1812	780	1	65	Male	WHO IV	GBM	NA	NA	Wildtype	Non-codel	un-methylated
CGGA_1814	221	1	46	Female	WHO IV	rGBM	1	1	Wildtype	Non-codel	un-methylated
CGGA_1815	185	1	45	Female	WHO IV	rGBM	1	1	Wildtype	Non-codel	methylated
CGGA_1817	399	1	72	Female	WHO IV	GBM	1	1	Wildtype	Non-codel	methylated
CGGA_1819	1005	1	55	Male	WHO IV	GBM	0	1	Wildtype	Non-codel	methylated
CGGA_1820	77	1	52	Female	WHO IV	rGBM	1	1	Wildtype	Non-codel	un-methylated
CGGA_1826	44	1	70	Female	WHO IV	GBM	0	0	Wildtype	Non-codel	methylated
CGGA_1829	801	0	23	Male	WHO II	A	0	0	Wildtype	Non-codel	methylated
CGGA_1833	494	1	60	Female	WHO IV	GBM	1	1	Wildtype	Non-codel	methylated
CGGA_1840	1179	0	58	Female	WHO IV	GBM	1	1	Wildtype	Non-codel	methylated
CGGA_1850	750	0	29	Male	WHO II	A	0	1	Mutant	Non-codel	methylated
CGGA_1854	1626	0	36	Male	WHO III	AA	0	1	Mutant	Non-codel	methylated
CGGA_1857	157	1	46	Male	WHO IV	rGBM	1	1	Wildtype	Non-codel	NA
CGGA_1862	110	1	40	Male	WHO III	AA	1	1	Wildtype	Non-codel	methylated
CGGA_1863	1594	0	50	Female	WHO III	rAO	1	1	Mutant	Codel	un-methylated
CGGA_1865	89	1	45	Female	WHO IV	rGBM	0	0	Wildtype	Non-codel	NA
CGGA_1866	127	1	68	Male	WHO IV	GBM	1	1	Wildtype	Non-codel	un-methylated
CGGA_1870	1556	0	62	Male	WHO IV	GBM	1	1	Mutant	Codel	un-methylated
CGGA_1875	1558	0	22	Female	WHO II	A	1	1	Wildtype	Non-codel	methylated
CGGA_1877	NA	NA	35	Male	WHO III	rAO	NA	NA	Mutant	Codel	methylated
CGGA_1880	1302	0	37	Female	WHO III	rAA	0	0	Mutant	Non-codel	NA
CGGA_1882	1531	0	33	Male	WHO III	AO	0	0	Mutant	Codel	methylated
CGGA_1886	338	1	31	Male	WHO IV	rGBM	1	1	Wildtype	Non-codel	un-methylated
CGGA_1899	176	1	45	Male	WHO IV	rGBM	1	1	Wildtype	Non-codel	un-methylated
CGGA_1901	540	1	60	Male	WHO IV	GBM	1	1	Wildtype	Non-codel	methylated
CGGA_1902	1479	0	33	Male	WHO II	A	0	0	Mutant	Non-codel	methylated
CGGA_1903	1474	0	24	Female	WHO III	AOA	1	1	NA	Codel	methylated
CGGA_1906	1054	1	57	Male	WHO III	rAA	0	1	Mutant	Non-codel	methylated
CGGA_1908	298	1	42	Female	WHO IV	rGBM	1	1	Wildtype	Non-codel	methylated
CGGA_1911	1451	0	15	Male	WHO IV	rGBM	1	1	Wildtype	Non-codel	methylated
CGGA_1912	507	1	48	Male	WHO IV	rGBM	1	1	NA	Non-codel	methylated
CGGA_1916	NA	NA	33	Female	WHO IV	GBM	0	0	Mutant	Non-codel	NA
CGGA_1939	NA	NA	31	Male	WHO II	rA	NA	1	NA	Non-codel	un-methylated
CGGA_194	2304	1	43	Female	WHO III	rAO	0	0	Mutant	Codel	methylated
CGGA_1946	142	1	51	Female	WHO IV	rGBM	1	1	Wildtype	Non-codel	un-methylated
CGGA_1953	73	1	47	Male	WHO IV	rGBM	1	1	Wildtype	Non-codel	methylated
CGGA_1955	457	1	30	Male	WHO IV	rGBM	1	1	NA	Non-codel	NA
CGGA_1972	1291	0	47	Male	WHO IV	rGBM	1	1	Wildtype	Non-codel	un-methylated
CGGA_1976	73	1	53	Female	WHO IV	rGBM	0	1	Wildtype	Non-codel	un-methylated
CGGA_1985	380	1	41	Male	WHO IV	rGBM	NA	NA	Mutant	Non-codel	un-methylated
CGGA_1994	1237	0	32	Female	WHO III	rAO	1	1	Mutant	Non-codel	methylated
CGGA_2002	572	1	40	Male	WHO II	rA	1	1	Mutant	Non-codel	un-methylated
CGGA_2003	780	1	40	Male	WHO IV	rGBM	1	1	Mutant	Non-codel	NA
CGGA_2006	626	1	43	Male	WHO III	rAA	1	1	Mutant	Non-codel	methylated
CGGA_2008	44	1	56	Male	WHO IV	rGBM	1	NA	Wildtype	Non-codel	methylated
CGGA_2013	139	1	41	Male	WHO II	rA	NA	NA	Mutant	Codel	un-methylated
CGGA_2024	328	1	19	Female	WHO IV	rGBM	1	NA	Wildtype	Non-codel	methylated
CGGA_2038	NA	1	44	Male	WHO IV	rGBM	1	1	Mutant	Non-codel	NA
CGGA_2039	702	0	28	Male	WHO IV	rGBM	1	1	Wildtype	Non-codel	methylated
CGGA_2046	251	1	46	Male	WHO III	rAA	1	1	Mutant	Non-codel	NA
CGGA_2047	598	1	64	Female	WHO IV	rGBM	1	1	Wildtype	Non-codel	NA
CGGA_2053	1031	0	55	Male	WHO IV	rGBM	1	1	Wildtype	Codel	NA
CGGA_2056	1019	0	41	Female	WHO IV	rGBM	1	1	Mutant	Non-codel	NA
CGGA_2062	41	1	63	Female	WHO IV	rGBM	1	1	Mutant	Non-codel	NA
CGGA_2075	266	1	63	Male	WHO IV	rGBM	NA	1	Wildtype	Non-codel	NA
CGGA_2078	280	1	61	Female	WHO IV	rGBM	1	1	Wildtype	Non-codel	NA
CGGA_2079	964	0	45	Male	WHO III	rAO	1	1	Mutant	Codel	NA
CGGA_2081	961	0	39	Female	WHO III	rAO	1	1	Mutant	Codel	NA
CGGA_2082	571	0	41	Male	WHO IV	rGBM	1	1	Wildtype	Non-codel	NA
CGGA_2088	NA	NA	30	Female	WHO IV	rGBM	1	1	Wildtype	Non-codel	NA
CGGA_2106	892	0	39	Female	WHO IV	rGBM	1	1	Mutant	Codel	methylated
CGGA_2115	171	1	31	Female	WHO IV	rGBM	NA	1	Wildtype	Non-codel	un-methylated
CGGA_2121	346	1	41	Female	WHO II	rA	NA	1	Mutant	Non-codel	un-methylated
CGGA_2129	828	0	48	Male	WHO III	rAA	1	0	Mutant	Non-codel	NA
CGGA_265	3959	0	43	Male	WHO II	rA	1	1	Mutant	Non-codel	methylated
CGGA_279	1314	1	49	Female	WHO III	rAA	0	1	Mutant	Non-codel	methylated
CGGA_28	1103	1	25	Male	WHO II	A	1	0	Mutant	Codel	un-methylated
CGGA_288	1057	1	49	Male	WHO II	rO	0	0	Mutant	Codel	un-methylated
CGGA_290	4725	0	37	Female	WHO II	O	1	0	Mutant	Codel	un-methylated
CGGA_320	3005	1	31	Male	WHO II	O	1	1	Mutant	Codel	NA
CGGA_336	2549	1	57	Female	WHO III	rAO	1	1	Mutant	Codel	un-methylated
CGGA_358	122	1	30	Female	WHO III	rAA	0	0	Mutant	Non-codel	methylated
CGGA_362	NA	NA	39	Female	WHO II	rA	0	NA	Mutant	Codel	un-methylated
CGGA_369	4606	0	33	Male	WHO II	rA	1	0	Mutant	Non-codel	NA
CGGA_406	90	1	24	Female	WHO III	rAA	0	0	Mutant	Non-codel	un-methylated
CGGA_42	2832	1	38	Male	WHO II	A	1	0	Mutant	Codel	un-methylated
CGGA_420	3514	0	39	Female	WHO III	rAO	1	1	Mutant	Codel	methylated
CGGA_457	75	1	32	Male	WHO III	rAA	0	0	Mutant	Non-codel	methylated
CGGA_474	2029	0	NA	Male	WHO III	AO	1	1	Wildtype	Non-codel	un-methylated
CGGA_482	2511	1	45	Male	WHO II	O	1	0	Mutant	Codel	methylated
CGGA_487	156	1	46	Male	WHO IV	rGBM	0	1	Wildtype	Non-codel	un-methylated
CGGA_492	652	0	27	Male	WHO III	rAA	1	1	Wildtype	Non-codel	un-methylated
CGGA_503	4410	0	51	Male	WHO II	A	1	1	Mutant	Non-codel	un-methylated
CGGA_507	302	1	53	Female	WHO III	rAA	0	1	Mutant	Non-codel	methylated
CGGA_509	623	1	38	Male	WHO IV	GBM	1	0	Wildtype	Non-codel	un-methylated
CGGA_521	514	1	32	Male	WHO III	AA	1	0	Wildtype	Non-codel	un-methylated
CGGA_530	506	1	41	Female	WHO IV	rGBM	0	1	Wildtype	Non-codel	methylated
CGGA_554	134	1	46	Female	WHO III	rAOA	0	0	NA	Non-codel	methylated
CGGA_568	285	1	14	Male	WHO IV	rGBM	0	1	Wildtype	Non-codel	un-methylated
CGGA_583	3107	1	36	Female	WHO II	A	1	0	Mutant	NA	un-methylated
CGGA_619	550	1	40	Male	WHO II	rA	0	0	Wildtype	Non-codel	NA
CGGA_621	NA	NA	40	Male	WHO III	rAA	1	0	Mutant	Non-codel	un-methylated
CGGA_625	2465	1	33	Female	WHO III	rAO	0	0	Mutant	Codel	un-methylated
CGGA_634	2633	1	35	Female	WHO III	AA	1	0	Mutant	Non-codel	un-methylated
CGGA_652	476	1	42	Male	WHO III	rAA	0	1	Mutant	Non-codel	methylated
CGGA_663	4210	0	29	Female	WHO II	A	1	1	Mutant	Non-codel	un-methylated
CGGA_703	1355	1	31	Female	WHO III	rAO	0	1	Mutant	Non-codel	NA
CGGA_705	1507	1	41	Male	WHO III	AA	1	0	Mutant	Non-codel	un-methylated
CGGA_707	3299	1	39	Female	WHO II	O	1	0	Mutant	Codel	NA
CGGA_720	1258	1	46	Female	WHO II	rA	0	0	Mutant	Non-codel	un-methylated
CGGA_721	2552	1	45	Male	WHO II	A	1	1	Mutant	Non-codel	un-methylated
CGGA_724	4147	0	32	Male	WHO II	rA	0	0	Mutant	Non-codel	un-methylated
CGGA_730	2118	1	51	Female	WHO II	rO	0	0	Mutant	Codel	NA
CGGA_763	319	0	52	Male	WHO III	rAA	0	0	Wildtype	Non-codel	un-methylated
CGGA_777	146	1	46	Male	WHO IV	rGBM	0	0	Wildtype	Non-codel	un-methylated
CGGA_780	923	1	64	Female	WHO III	rAO	0	1	Wildtype	Non-codel	un-methylated
CGGA_799	1868	1	53	Male	WHO III	rAO	0	1	Mutant	Codel	methylated
CGGA_809	1252	1	26	Male	WHO II	A	1	0	Mutant	Non-codel	un-methylated
CGGA_810	551	1	20	Male	WHO III	rAO	1	1	Wildtype	Non-codel	un-methylated
CGGA_825	836	1	36	Male	WHO III	rAA	1	1	Mutant	Non-codel	NA
CGGA_831	546	1	55	Female	WHO IV	GBM	1	1	Wildtype	Non-codel	un-methylated
CGGA_846	2991	0	39	Female	WHO II	rA	0	1	Wildtype	Non-codel	NA
CGGA_852	169	1	40	Male	WHO III	AA	1	0	Wildtype	Non-codel	un-methylated
CGGA_861	893	1	29	Male	WHO III	AA	0	0	Wildtype	Non-codel	NA
CGGA_862	NA	NA	30	Male	WHO II	rA	0	NA	Mutant	Non-codel	NA
CGGA_863	2073	1	42	Female	WHO II	A	1	0	Wildtype	Non-codel	un-methylated
CGGA_867	367	1	40	Female	WHO III	rAA	1	0	Mutant	Non-codel	methylated
CGGA_869	537	0	36	Female	WHO IV	rGBM	NA	NA	Wildtype	Non-codel	un-methylated
CGGA_881	252	1	23	Female	WHO III	rAA	0	1	Wildtype	Non-codel	NA
CGGA_882	1008	0	30	Male	WHO III	rAA	1	0	Mutant	Non-codel	NA
CGGA_883	NA	NA	39	Female	WHO II	rA	0	NA	Mutant	Non-codel	NA
CGGA_887	NA	NA	25	Male	WHO III	rAO	NA	NA	Wildtype	Non-codel	NA
CGGA_888	669	1	29	Male	WHO III	rAO	1	1	Mutant	Codel	NA
CGGA_889	3943	0	23	Male	WHO II	A	1	1	Mutant	Non-codel	NA
CGGA_890	2982	1	39	Male	WHO III	AA	1	0	Mutant	Non-codel	NA
CGGA_901	929	1	40	Male	WHO III	AA	0	0	Mutant	Non-codel	NA
CGGA_903	1455	1	27	Female	WHO III	AA	1	0	Mutant	Non-codel	NA
CGGA_D19	297	1	64	Female	WHO II	rO	0	0	Mutant	Codel	methylated
CGGA_D28	860	1	25	Male	WHO III	AA	1	0	Mutant	Non-codel	NA
CGGA_D49	NA	NA	32	Female	NA	NA	NA	NA	Mutant	Codel	NA
CGGA_D50	782	1	30	Male	WHO II	rO	0	0	Mutant	Codel	NA
CGGA_D53	NA	NA	30	Male	WHO IV	rGBM	NA	NA	Wildtype	Non-codel	un-methylated
CGGA_J50	1693	1	27	Male	WHO II	rOA	1	1	Mutant	NA	NA
CGGA_J73	1134	1	34	Female	WHO III	AO	1	1	Mutant	NA	NA
CGGA_P100	268	1	67	Male	WHO IV	GBM	NA	NA	Wildtype	Non-codel	NA
CGGA_P102	1269	1	30	Male	WHO IV	GBM	1	1	Mutant	Non-codel	NA
CGGA_P103	1651	0	34	Male	WHO II	O	1	0	Mutant	Codel	NA
CGGA_P104	167	1	36	Female	WHO III	rAOA	NA	1	Mutant	NA	NA
CGGA_P106	71	1	24	Male	WHO IV	rGBM	1	1	Wildtype	Non-codel	NA
CGGA_P107	NA	NA	26	Male	WHO II	A	NA	NA	Mutant	Non-codel	NA
CGGA_P108	1644	0	30	Female	WHO III	AA	1	1	Wildtype	Non-codel	NA
CGGA_P109	407	1	35	Male	WHO IV	rGBM	0	1	Mutant	Non-codel	NA
CGGA_P11	NA	NA	38	Female	WHO II	A	NA	NA	Mutant	Non-codel	NA
CGGA_P110	800	1	56	Female	WHO III	AO	1	1	Wildtype	Non-codel	NA
CGGA_P111	1638	0	44	Female	WHO II	O	0	0	Mutant	Codel	NA
CGGA_P112	834	1	65	Male	WHO IV	GBM	1	1	Wildtype	Non-codel	NA
CGGA_P113	1708	0	32	Male	WHO II	A	1	0	Wildtype	Non-codel	NA
CGGA_P114	NA	1	32	Male	WHO II	O	1	NA	Mutant	Codel	NA
CGGA_P115	1626	0	25	Male	WHO II	A	1	0	Wildtype	NA	NA
CGGA_P116	305	1	58	Male	WHO IV	GBM	1	NA	Wildtype	NA	NA
CGGA_P121	1608	0	39	Male	WHO II	A	1	0	Wildtype	Non-codel	NA
CGGA_P122	1638	0	43	Male	WHO II	rO	1	0	Mutant	Codel	NA
CGGA_P128	1586	0	41	Male	WHO II	A	1	0	Mutant	Non-codel	NA
CGGA_P13	1938	0	40	Female	WHO II	O	0	0	Mutant	Codel	NA
CGGA_P131	1596	0	45	Female	WHO III	AO	1	1	Mutant	Codel	NA
CGGA_P132	1603	0	42	Male	WHO II	O	1	0	Mutant	Codel	NA
CGGA_P136	842	1	41	Female	WHO IV	GBM	1	1	Wildtype	NA	NA
CGGA_P137	1526	0	42	Male	WHO II	A	0	0	Mutant	Non-codel	NA
CGGA_P142	1558	0	45	Male	WHO III	AO	1	1	Mutant	Codel	NA
CGGA_P143	261	1	66	Female	WHO IV	GBM	1	1	Wildtype	Non-codel	NA
CGGA_P144	1559	0	44	Male	WHO III	AA	1	1	Mutant	Non-codel	NA
CGGA_P145	308	1	53	Male	WHO II	A	1	0	Mutant	Non-codel	NA
CGGA_P146	NA	0	31	Male	WHO II	rA	1	1	Mutant	Non-codel	NA
CGGA_P147	863	1	52	Male	WHO II	A	1	0	Mutant	Non-codel	NA
CGGA_P15	723	1	49	Male	WHO IV	GBM	1	1	NA	Non-codel	NA
CGGA_P150	NA	0	34	Male	WHO II	A	1	0	Mutant	Non-codel	NA
CGGA_P151	1582	0	46	Female	WHO II	A	1	1	Mutant	Non-codel	NA
CGGA_P153	1484	0	45	Male	WHO II	A	1	1	Mutant	NA	NA
CGGA_P154	NA	NA	50	Male	WHO IV	GBM	NA	NA	Mutant	NA	NA
CGGA_P155	1483	0	50	Male	WHO II	A	1	1	Wildtype	Non-codel	NA
CGGA_P156	1488	0	30	Male	WHO II	O	0	0	Mutant	Codel	NA
CGGA_P157	470	1	55	Female	WHO III	AA	1	1	Wildtype	Non-codel	NA
CGGA_P158	1510	0	27	Male	WHO II	OA	1	1	Mutant	NA	NA
CGGA_P159	211	1	59	Male	WHO III	AA	0	0	Wildtype	Non-codel	NA
CGGA_P16	NA	NA	38	Male	WHO IV	GBM	NA	NA	Mutant	Codel	NA
CGGA_P160	219	1	72	Female	WHO IV	GBM	1	1	Wildtype	Non-codel	NA
CGGA_P163	855	1	45	Female	WHO III	rAO	1	1	Mutant	Non-codel	un-methylated
CGGA_P164	1553	0	27	Male	WHO IV	GBM	1	1	Wildtype	NA	NA
CGGA_P165	598	1	51	Female	WHO III	AOA	1	1	Mutant	NA	NA
CGGA_P17	1930	0	30	Male	WHO III	AO	1	1	Mutant	Codel	NA
CGGA_P172	1049	1	33	Male	WHO III	AA	1	1	Mutant	NA	NA
CGGA_P173	1448	0	31	Male	WHO II	A	1	0	Mutant	Non-codel	un-methylated
CGGA_P174	1482	0	31	Male	WHO II	O	1	1	Mutant	Codel	NA
CGGA_P175	183	1	45	Male	WHO IV	rGBM	1	1	Wildtype	NA	NA
CGGA_P176	804	0	32	Female	WHO II	O	1	0	Mutant	Codel	NA
CGGA_P177	1442	0	43	Male	WHO II	A	1	1	Wildtype	Non-codel	methylated
CGGA_P178	1442	0	52	Female	WHO IV	GBM	1	1	Wildtype	NA	methylated
CGGA_P179	1454	0	53	Female	WHO II	A	1	1	Mutant	Non-codel	methylated
CGGA_P18	387	1	40	Male	WHO III	AA	0	1	Mutant	Non-codel	NA
CGGA_P180	260	1	47	Male	WHO IV	GBM	1	1	Mutant	NA	NA
CGGA_P181	238	1	21	Female	WHO III	AA	NA	NA	Wildtype	Non-codel	NA
CGGA_P182	1512	0	58	Female	WHO IV	rGBM	1	1	Wildtype	Non-codel	NA
CGGA_P183	1512	0	58	Male	WHO III	AO	1	1	Mutant	Codel	NA
CGGA_P185	502	1	41	Female	WHO III	rAA	1	1	Mutant	Non-codel	NA
CGGA_P19	1924	0	39	Male	WHO II	A	1	1	Mutant	Non-codel	NA
CGGA_P199	203	1	66	Male	WHO IV	rGBM	0	0	Wildtype	Non-codel	NA
CGGA_P20	1923	0	58	Female	WHO II	A	1	0	Mutant	Non-codel	NA
CGGA_P205	583	1	66	Male	WHO IV	GBM	1	1	Wildtype	NA	NA
CGGA_P21	1922	0	25	Male	WHO II	A	1	1	Mutant	Non-codel	NA
CGGA_P22	406	1	62	Male	WHO IV	GBM	1	1	Wildtype	Non-codel	NA
CGGA_P23	392	1	62	Female	WHO III	AA	1	1	Wildtype	NA	NA
CGGA_P25	147	1	64	Male	WHO IV	GBM	1	1	Wildtype	NA	NA
CGGA_P265	779	1	36	Male	WHO III	AA	1	1	Wildtype	NA	methylated
CGGA_P266	253	1	28	Female	WHO III	AA	1	1	Wildtype	NA	methylated
CGGA_P269	511	1	47	Female	WHO III	rAO	1	1	Wildtype	Codel	NA
CGGA_P27	413	0	37	Female	WHO II	A	1	0	Mutant	Non-codel	NA
CGGA_P270	NA	1	33	Male	WHO II	rA	1	1	Mutant	Non-codel	un-methylated
CGGA_P271	1376	0	42	Male	WHO II	A	1	0	Mutant	NA	methylated
CGGA_P279	1334	0	47	Female	WHO III	rAO	1	1	Mutant	Codel	NA
CGGA_P28	107	1	61	Male	WHO IV	GBM	0	0	Wildtype	Non-codel	NA
CGGA_P280	1342	0	52	Female	WHO IV	rGBM	1	1	Wildtype	Non-codel	methylated
CGGA_P283	1331	0	38	Male	WHO IV	rGBM	1	1	Wildtype	Non-codel	methylated
CGGA_P286	658	0	57	Female	WHO II	rO	NA	0	Mutant	Codel	methylated
CGGA_P29	103	1	22	Female	WHO III	rAOA	1	1	Mutant	NA	NA
CGGA_P295	273	1	46	Male	WHO IV	rGBM	1	1	Wildtype	Non-codel	un-methylated
CGGA_P298	NA	0	50	Female	WHO III	rAO	1	0	Mutant	Codel	methylated
CGGA_P3	2126	0	32	Male	WHO III	rAOA	1	0	Mutant	NA	NA
CGGA_P30	404	1	48	Male	WHO II	A	1	1	Wildtype	Non-codel	NA
CGGA_P306	922	1	49	Male	WHO II	rO	1	1	Mutant	Codel	methylated
CGGA_P308	563	1	38	Male	WHO III	rAA	1	1	Mutant	Non-codel	methylated
CGGA_P31	1883	0	42	Male	WHO II	A	0	1	Wildtype	Non-codel	NA
CGGA_P310	224	1	47	Female	WHO III	rAA	1	1	NA	Codel	methylated
CGGA_P311	1247	0	36	Male	WHO II	rA	0	1	Mutant	Non-codel	methylated
CGGA_P314	1238	0	34	Female	WHO III	rAO	1	1	Mutant	Codel	methylated
CGGA_P315	451	1	47	Female	WHO II	rA	NA	NA	Mutant	Non-codel	NA
CGGA_P316	567	0	44	Male	WHO II	rA	NA	NA	NA	Non-codel	NA
CGGA_P319	508	1	37	Male	WHO III	rAA	1	0	Mutant	Non-codel	methylated
CGGA_P326	1217	0	48	Female	WHO III	rAA	1	1	Mutant	Non-codel	methylated
CGGA_P328	580	1	54	Female	WHO III	rAA	1	1	Mutant	Non-codel	NA
CGGA_P335	1203	0	42	Male	WHO IV	rGBM	1	1	Mutant	Codel	methylated
CGGA_P337	689	1	61	Female	WHO III	rAO	1	1	Mutant	Codel	methylated
CGGA_P338	1198	0	51	Male	WHO II	rO	1	1	Wildtype	Non-codel	methylated
CGGA_P346	522	0	42	Male	WHO II	rA	NA	0	Mutant	Non-codel	NA
CGGA_P356	569	1	22	Female	WHO II	rA	1	1	Mutant	Non-codel	methylated
CGGA_P358	1168	0	44	Male	WHO II	rA	1	1	Mutant	Non-codel	un-methylated
CGGA_P364	495	1	41	Female	WHO III	rAA	1	0	Mutant	Non-codel	methylated
CGGA_P385	1112	0	22	Male	WHO IV	rGBM	1	1	Wildtype	Non-codel	NA
CGGA_P388	293	1	37	Female	WHO III	rAA	1	1	Mutant	Non-codel	methylated
CGGA_P392	1099	0	35	Male	WHO II	rA	1	1	Mutant	Codel	methylated
CGGA_P399	1090	0	41	Female	WHO II	rO	1	1	Mutant	Codel	methylated
CGGA_P401	788	1	31	Male	WHO IV	rGBM	1	NA	Mutant	Non-codel	NA
CGGA_P411	440	1	47	Female	WHO IV	rGBM	1	1	Mutant	Non-codel	methylated
CGGA_P415	195	1	56	Female	WHO IV	rGBM	NA	1	Wildtype	Non-codel	NA
CGGA_P416	1069	0	29	Male	WHO III	rAO	1	1	Mutant	Codel	methylated
CGGA_P421	308	1	26	Male	WHO III	rAA	NA	1	Mutant	Non-codel	methylated
CGGA_P422	1091	0	41	Female	WHO II	O	1	0	Mutant	Codel	methylated
CGGA_P437	1023	0	47	Female	WHO III	AO	0	1	Mutant	Codel	NA
CGGA_P438	1023	0	41	Male	WHO III	rAO	1	1	Mutant	Codel	NA
CGGA_P439	1022	0	45	Male	WHO II	rA	1	1	Mutant	Non-codel	NA
CGGA_P446	1009	0	47	Female	WHO III	rAO	1	1	Mutant	Codel	NA
CGGA_P461	599	1	28	Male	WHO III	rAA	1	1	Mutant	Non-codel	methylated
CGGA_P468	974	0	42	Female	WHO III	AO	1	1	Mutant	Codel	methylated
CGGA_P483	299	1	41	Male	WHO III	rAA	1	1	Wildtype	Non-codel	methylated
CGGA_P492	938	0	44	Female	WHO II	rO	0	1	Mutant	Codel	methylated
CGGA_P499	NA	NA	69	Female	WHO IV	rGBM	NA	NA	Wildtype	Non-codel	NA
CGGA_P5	378	1	45	Female	WHO III	rAA	1	1	Mutant	Non-codel	NA
CGGA_P500	930	0	34	Female	WHO II	rO	1	0	Mutant	Codel	methylated
CGGA_P501	926	0	27	Male	WHO II	rA	1	1	Mutant	Non-codel	methylated
CGGA_P505	924	0	34	Male	WHO II	rA	1	0	Mutant	Non-codel	methylated
CGGA_P508	377	1	40	Male	WHO III	rAA	1	1	Mutant	Non-codel	methylated
CGGA_P510	912	0	42	Male	WHO III	rAO	1	1	Mutant	Non-codel	methylated
CGGA_P512	541	1	23	Male	WHO IV	rGBM	1	1	Wildtype	Non-codel	methylated
CGGA_P520	884	0	44	Female	WHO III	rAO	1	1	Mutant	Codel	NA
CGGA_P568	218	1	23	Female	WHO III	rAO	1	1	Mutant	Codel	methylated
CGGA_P585	344	1	50	Male	WHO IV	rGBM	1	1	Wildtype	Non-codel	methylated
CGGA_P594	84	1	40	Male	WHO III	rAA	1	1	Wildtype	Non-codel	un-methylated
CGGA_P596	777	0	60	Female	WHO IV	rGBM	1	1	Mutant	Codel	methylated
CGGA_P604	262	1	15	Female	WHO III	rAA	1	1	Wildtype	Non-codel	un-methylated
CGGA_P609	726	0	19	Female	WHO IV	GBM	1	1	Wildtype	Non-codel	un-methylated
CGGA_P610	345	1	62	Male	WHO IV	rGBM	1	1	Wildtype	NA	methylated
CGGA_P615	NA	NA	40	Male	WHO II	rO	NA	NA	Mutant	Codel	methylated
CGGA_P619	236	1	66	Female	WHO IV	rGBM	1	1	Wildtype	Non-codel	NA
CGGA_P623	NA	NA	52	Male	WHO III	AA	NA	NA	Mutant	Non-codel	NA
CGGA_P625	161	1	46	Female	WHO IV	rGBM	NA	NA	Mutant	Non-codel	methylated
CGGA_P633	676	0	40	Female	WHO III	rAA	1	1	Mutant	Non-codel	NA
CGGA_P7	110	1	45	Male	WHO IV	rGBM	NA	1	Wildtype	Non-codel	NA
CGGA_P83	1698	0	28	Female	WHO II	A	1	1	Mutant	Non-codel	NA
CGGA_P84	1694	0	40	Female	WHO II	A	1	0	Mutant	Non-codel	NA
CGGA_P86	1694	0	34	Female	WHO II	O	1	0	Mutant	Codel	NA
CGGA_P87	240	1	32	Male	WHO IV	rGBM	NA	1	Mutant	Non-codel	NA
CGGA_P89	294	1	42	Male	WHO IV	rGBM	1	1	Wildtype	Non-codel	NA
CGGA_P93	1678	0	45	Female	WHO II	A	1	1	Mutant	Non-codel	NA
CGGA_P98	317	1	44	Male	WHO III	rAA	1	1	Mutant	Non-codel	NA
CGGA_P99	679	0	52	Male	WHO IV	rGBM	1	1	Mutant	Non-codel	NA
CGGA_1001	3817	0	11	Male	WHO IV	GBM	0	1	Wildtype	Non-codel	un-methylated
CGGA_1006	254	1	42	Male	WHO III	AA	1	1	Wildtype	Non-codel	un-methylated
CGGA_1007	345	1	57	Female	WHO IV	GBM	1	1	Wildtype	Non-codel	un-methylated
CGGA_1011	109	1	46	Female	WHO IV	GBM	1	0	Wildtype	Non-codel	un-methylated
CGGA_1015	164	1	62	Male	WHO IV	GBM	1	0	Wildtype	Non-codel	un-methylated
CGGA_1019	212	1	60	Male	WHO IV	rGBM	0	1	Wildtype	Non-codel	methylated
CGGA_1022	518	0	62	Female	WHO II	rA	0	1	Wildtype	Non-codel	un-methylated
CGGA_1023	681	1	56	Female	WHO IV	GBM	1	1	Wildtype	Non-codel	un-methylated
CGGA_1024	3074	1	64	Male	WHO IV	GBM	1	1	Wildtype	Non-codel	methylated
CGGA_1026	1570	1	57	Male	WHO IV	GBM	1	1	Wildtype	Non-codel	methylated
CGGA_1034	753	1	23	Male	WHO III	AA	1	1	Wildtype	Non-codel	un-methylated
CGGA_1035	567	1	60	Female	WHO IV	GBM	1	0	Wildtype	Non-codel	methylated
CGGA_1039	727	1	40	Male	WHO IV	GBM	0	1	Wildtype	Non-codel	methylated
CGGA_1045	348	1	79	Male	WHO IV	GBM	1	1	Wildtype	Non-codel	un-methylated
CGGA_1049	809	1	58	Male	WHO IV	GBM	1	1	Wildtype	Non-codel	un-methylated
CGGA_1052	NA	NA	41	Male	WHO II	O	NA	NA	Mutant	Codel	un-methylated
CGGA_1072	1090	1	26	Male	WHO IV	GBM	1	1	Wildtype	Non-codel	un-methylated
CGGA_1077	591	1	47	Male	WHO IV	GBM	1	0	Wildtype	Non-codel	un-methylated
CGGA_1078	315	1	61	Female	WHO IV	rGBM	1	1	Wildtype	Non-codel	methylated
CGGA_1079	471	1	38	Male	WHO III	AA	NA	NA	Wildtype	Non-codel	un-methylated
CGGA_1081	216	1	30	Female	WHO III	rAA	0	0	Wildtype	Non-codel	un-methylated
CGGA_1083	450	1	59	Male	WHO IV	GBM	1	1	Wildtype	Non-codel	un-methylated
CGGA_1091	1116	1	51	Female	WHO IV	GBM	1	1	Wildtype	Non-codel	methylated
CGGA_1109	1348	1	42	Male	WHO IV	GBM	NA	NA	Wildtype	Non-codel	un-methylated
CGGA_1124	484	1	47	Male	WHO IV	GBM	1	1	Wildtype	Non-codel	un-methylated
CGGA_1139	1196	1	53	Female	WHO IV	GBM	1	1	Wildtype	Non-codel	methylated
CGGA_1140	921	1	49	Female	WHO III	rAA	0	1	Wildtype	Non-codel	methylated
CGGA_1145	239	1	41	Male	WHO III	rAA	1	1	Wildtype	Non-codel	methylated
CGGA_1171	412	1	40	Male	WHO IV	GBM	1	0	Wildtype	Non-codel	methylated
CGGA_1177	449	1	40	Male	WHO IV	rGBM	1	1	Wildtype	Non-codel	un-methylated
CGGA_1180	1226	0	48	Female	WHO IV	GBM	1	1	Wildtype	Non-codel	un-methylated
CGGA_1188	256	1	30	Female	WHO IV	sGBM	1	1	Mutant	Non-codel	un-methylated
CGGA_1214	604	1	49	Female	WHO IV	GBM	1	1	Wildtype	Non-codel	methylated
CGGA_1216	312	1	44	Male	WHO IV	GBM	1	1	Wildtype	Non-codel	methylated
CGGA_1218	286	1	53	Male	WHO IV	sGBM	1	1	Wildtype	Non-codel	un-methylated
CGGA_1224	271	1	57	Male	WHO IV	GBM	1	1	Wildtype	Non-codel	un-methylated
CGGA_1234	705	1	32	Male	WHO IV	GBM	1	1	Wildtype	Non-codel	un-methylated
CGGA_1237	296	1	62	Male	WHO IV	GBM	1	1	Wildtype	Non-codel	un-methylated
CGGA_1240	19	1	33	Male	WHO IV	GBM	0	0	Wildtype	Non-codel	un-methylated
CGGA_1251	272	1	42	Female	WHO IV	GBM	1	1	Wildtype	Non-codel	un-methylated
CGGA_1258	114	1	42	Male	WHO IV	GBM	0	0	Wildtype	Non-codel	un-methylated
CGGA_1263	772	1	50	Male	WHO III	AA	1	0	Wildtype	Non-codel	un-methylated
CGGA_1270	188	1	60	Female	WHO IV	GBM	1	1	Wildtype	Non-codel	un-methylated
CGGA_1271	523	1	17	Male	WHO IV	rGBM	1	1	Wildtype	Non-codel	methylated
CGGA_1272	124	1	32	Male	WHO IV	sGBM	1	0	Mutant	Non-codel	methylated
CGGA_1280	447	1	74	Male	WHO III	AA	1	1	Wildtype	Non-codel	un-methylated
CGGA_1281	2909	0	45	Male	WHO III	AA	1	1	Wildtype	Codel	methylated
CGGA_1283	20	1	17	Male	WHO IV	sGBM	1	1	Wildtype	Non-codel	un-methylated
CGGA_1284	97	1	73	Male	WHO III	AA	0	1	Wildtype	Non-codel	un-methylated
CGGA_1285	79	1	58	Female	WHO IV	rGBM	0	0	Wildtype	Non-codel	methylated
CGGA_1292	2901	0	17	Male	WHO III	AA	1	1	Wildtype	Non-codel	methylated
CGGA_1299	550	1	54	Male	WHO IV	GBM	1	1	Wildtype	Non-codel	un-methylated
CGGA_1301	239	1	48	Male	WHO IV	sGBM	1	1	Wildtype	Non-codel	un-methylated
CGGA_1313	379	1	42	Male	WHO IV	GBM	1	1	Wildtype	Non-codel	un-methylated
CGGA_1320	59	1	19	Male	WHO IV	GBM	0	1	Wildtype	Non-codel	un-methylated
CGGA_1332	510	0	55	Female	WHO IV	GBM	0	1	Wildtype	Non-codel	methylated
CGGA_1338	1122	1	61	Female	WHO IV	GBM	1	1	Wildtype	Non-codel	methylated
CGGA_1340	1109	1	35	Male	WHO III	AA	1	1	Wildtype	Non-codel	un-methylated
CGGA_1342	186	1	47	Male	WHO IV	GBM	1	1	Wildtype	Non-codel	un-methylated
CGGA_1343	94	1	34	Male	WHO IV	rGBM	1	1	Wildtype	Non-codel	methylated
CGGA_1346	284	1	57	Female	WHO IV	sGBM	1	1	Wildtype	Non-codel	un-methylated
CGGA_1370	325	0	43	Male	WHO IV	rGBM	1	1	Wildtype	Non-codel	un-methylated
CGGA_1393	275	1	41	Male	WHO IV	sGBM	1	1	Wildtype	Non-codel	methylated
CGGA_1408	1362	1	64	Female	WHO III	AA	1	1	Wildtype	Non-codel	un-methylated
CGGA_1411	329	1	40	Female	WHO III	rAA	1	1	Wildtype	Non-codel	methylated
CGGA_235	2340	1	24	Male	WHO II	O	1	1	Mutant	Codel	methylated
CGGA_269	2932	0	45	Female	WHO II	A	1	0	Wildtype	Non-codel	un-methylated
CGGA_272	217	1	51	Male	WHO IV	sGBM	0	0	Wildtype	Non-codel	un-methylated
CGGA_274	610	0	55	Female	WHO IV	GBM	1	1	Wildtype	Non-codel	un-methylated
CGGA_276	529	0	44	Male	WHO II	O	0	0	Mutant	Non-codel	methylated
CGGA_309	139	1	44	Male	NA	NA	1	1	Wildtype	NA	un-methylated
CGGA_318	222	1	40	Female	WHO IV	sGBM	NA	1	Wildtype	Non-codel	un-methylated
CGGA_323	4338	0	48	Female	WHO II	O	0	0	Wildtype	Non-codel	un-methylated
CGGA_330	1121	1	45	Male	WHO III	AA	1	1	Wildtype	Non-codel	un-methylated
CGGA_413	183	0	54	Male	WHO IV	GBM	1	1	Wildtype	Non-codel	un-methylated
CGGA_426	1560	1	50	Male	WHO III	AA	1	1	Wildtype	Non-codel	un-methylated
CGGA_448	354	1	64	Male	WHO III	AA	1	1	Wildtype	Non-codel	un-methylated
CGGA_483	277	1	59	Female	WHO IV	GBM	1	1	Wildtype	Non-codel	un-methylated
CGGA_488	435	1	23	Male	WHO III	AA	1	1	Wildtype	Non-codel	un-methylated
CGGA_493	2382	1	32	Female	WHO II	A	1	1	Mutant	Non-codel	un-methylated
CGGA_494	4435	0	58	Female	WHO IV	GBM	1	1	Wildtype	Non-codel	methylated
CGGA_495	295	1	53	Male	NA	NA	0	0	Wildtype	NA	un-methylated
CGGA_499	122	1	51	Male	WHO IV	GBM	1	0	Wildtype	Non-codel	methylated
CGGA_525	138	1	61	Male	WHO IV	GBM	1	0	Wildtype	Non-codel	methylated
CGGA_541	4376	0	36	Female	WHO II	A	1	0	Wildtype	Non-codel	un-methylated
CGGA_564	679	1	47	Male	WHO III	AA	1	1	Wildtype	Non-codel	methylated
CGGA_565	3605	0	51	Male	WHO III	AA	1	0	Wildtype	Non-codel	un-methylated
CGGA_578	362	1	61	Female	WHO III	AA	1	1	Wildtype	Non-codel	methylated
CGGA_599	418	1	66	Female	WHO III	AO	1	0	Wildtype	Non-codel	un-methylated
CGGA_604	381	1	46	Male	WHO IV	GBM	1	1	Wildtype	Non-codel	methylated
CGGA_616	952	1	43	Male	WHO III	AA	1	1	Wildtype	Non-codel	methylated
CGGA_624	122	1	50	Female	WHO IV	rGBM	NA	NA	Wildtype	Non-codel	un-methylated
CGGA_630	4300	0	43	Male	WHO III	rO	1	1	Mutant	Codel	methylated
CGGA_633	1812	1	56	Female	WHO II	O	1	1	Wildtype	Non-codel	un-methylated
CGGA_638	2386	0	42	Male	WHO II	O	1	0	Mutant	Codel	un-methylated
CGGA_643	331	1	56	Male	WHO III	AA	1	1	Wildtype	Non-codel	un-methylated
CGGA_658	372	1	55	Male	WHO IV	GBM	1	1	Wildtype	Non-codel	methylated
CGGA_659	730	0	50	Female	WHO II	O	1	1	Wildtype	Non-codel	un-methylated
CGGA_661	NA	1	42	Male	WHO III	AA	1	0	Wildtype	Non-codel	methylated
CGGA_669	607	1	56	Female	WHO IV	rGBM	0	1	Wildtype	Codel	un-methylated
CGGA_676	376	1	60	Male	WHO IV	GBM	1	1	Wildtype	Non-codel	un-methylated
CGGA_678	386	1	56	Male	WHO III	rAA	0	1	Wildtype	Non-codel	un-methylated
CGGA_679	263	1	63	Female	WHO IV	GBM	1	0	Wildtype	Non-codel	methylated
CGGA_680	2373	1	44	Male	WHO IV	GBM	1	1	Wildtype	Non-codel	un-methylated
CGGA_681	110	1	42	Male	NA	NA	NA	NA	Wildtype	NA	methylated
CGGA_700	170	0	24	Female	WHO IV	GBM	1	1	Mutant	Non-codel	methylated
CGGA_727	1023	1	45	Male	WHO III	AA	1	1	Wildtype	Non-codel	methylated
CGGA_731	503	1	50	Male	WHO IV	GBM	1	0	Wildtype	Non-codel	un-methylated
CGGA_732	NA	NA	35	Female	WHO III	AA	0	NA	Wildtype	Non-codel	un-methylated
CGGA_766	4103	0	32	Male	WHO II	O	1	0	Mutant	Codel	methylated
CGGA_773	443	1	51	Female	WHO IV	sGBM	0	0	Mutant	Non-codel	un-methylated
CGGA_782	289	1	60	Male	WHO IV	GBM	1	0	Wildtype	Non-codel	un-methylated
CGGA_789	345	1	50	Male	WHO IV	GBM	1	0	Wildtype	Non-codel	un-methylated
CGGA_791	252	1	55	Male	WHO III	AA	1	0	Wildtype	Non-codel	un-methylated
CGGA_796	559	0	60	Male	WHO II	A	1	1	Wildtype	Non-codel	un-methylated
CGGA_802	681	1	42	Male	WHO IV	GBM	1	1	Wildtype	Non-codel	un-methylated
CGGA_804	614	0	53	Female	WHO IV	GBM	1	1	Wildtype	Non-codel	methylated
CGGA_807	4040	0	42	Male	WHO II	A	1	1	Wildtype	Non-codel	NA
CGGA_808	1167	0	38	Male	WHO IV	GBM	1	1	Wildtype	Non-codel	un-methylated
CGGA_837	432	1	57	Male	WHO IV	GBM	1	1	Wildtype	Non-codel	methylated
CGGA_842	204	1	63	Female	WHO IV	GBM	1	1	Wildtype	Non-codel	un-methylated
CGGA_848	239	0	54	Female	WHO IV	GBM	1	1	Wildtype	Non-codel	un-methylated
CGGA_850	564	0	52	Female	WHO IV	GBM	0	0	Wildtype	Non-codel	un-methylated
CGGA_859	387	1	56	Male	WHO IV	GBM	1	0	Wildtype	Non-codel	un-methylated
CGGA_871	3964	0	37	Male	WHO II	O	1	0	Mutant	Codel	methylated
CGGA_876	159	1	60	Female	WHO IV	GBM	NA	NA	Wildtype	Non-codel	un-methylated
CGGA_878	863	1	42	Male	WHO IV	GBM	0	1	Wildtype	Non-codel	un-methylated
CGGA_902	193	1	54	Male	WHO IV	GBM	NA	NA	Wildtype	Non-codel	un-methylated
CGGA_D02	484	1	44	Male	WHO IV	rGBM	0	1	Wildtype	Non-codel	methylated
CGGA_D03	423	1	44	Male	WHO IV	GBM	1	1	Wildtype	Non-codel	methylated
CGGA_D06	NA	1	49	Female	WHO III	rAA	1	1	Wildtype	Codel	un-methylated
CGGA_D09	233	1	57	Male	WHO IV	GBM	1	0	Wildtype	Non-codel	un-methylated
CGGA_D11	827	1	53	Female	WHO III	AA	1	1	Wildtype	Non-codel	methylated
CGGA_D16	261	1	59	Female	WHO III	AA	1	0	Wildtype	Non-codel	methylated
CGGA_D18	NA	NA	20	Male	WHO III	AA	NA	NA	Wildtype	Non-codel	methylated
CGGA_D26	263	1	55	Male	WHO IV	rGBM	0	0	Wildtype	Non-codel	un-methylated
CGGA_D32	358	1	61	Male	WHO IV	rGBM	0	1	Wildtype	Non-codel	un-methylated
CGGA_D35	661	1	68	Female	WHO IV	GBM	1	0	Wildtype	Non-codel	methylated
CGGA_D36	34	1	58	Male	WHO IV	rGBM	0	0	Wildtype	Non-codel	methylated
CGGA_D37	965	1	55	Male	WHO IV	GBM	1	1	Wildtype	Non-codel	un-methylated
CGGA_D44	313	1	18	Female	WHO III	AA	1	0	Wildtype	Non-codel	NA
CGGA_D51	135	1	60	Female	WHO IV	rGBM	0	0	Wildtype	Non-codel	un-methylated
CGGA_D57	766	1	40	Male	WHO IV	GBM	1	1	Wildtype	Non-codel	NA
CGGA_D58	181	1	24	Male	WHO III	rAA	0	0	Wildtype	Codel	un-methylated
CGGA_342	500	1	49	Female	WHO IV	GBM	1	1	Wildtype	NA	methylated
CGGA_719	101	1	51	Male	WHO IV	sGBM	1	1	Mutant	NA	un-methylated
CGGA_J030	3389	0	38	Male	WHO II	O	1	0	Mutant	Codel	NA
CGGA_J130	3116	0	40	Male	WHO II	rA	1	1	Wildtype	Non-codel	NA
CGGA_1005	3815	0	41	Female	WHO II	A	0	1	Mutant	Non-codel	methylated
CGGA_1013	1725	1	38	Female	WHO II	A	1	0	Mutant	Non-codel	methylated
CGGA_1020	1120	1	38	Female	WHO II	A	1	0	Mutant	Non-codel	un-methylated
CGGA_1027	2688	0	37	Male	WHO III	AO	1	1	Mutant	Codel	methylated
CGGA_1031	2457	1	31	Female	WHO II	A	0	1	Mutant	Non-codel	un-methylated
CGGA_1046	3559	0	21	Male	WHO II	A	NA	1	NA	NA	methylated
CGGA_1050	NA	0	39	Male	WHO II	O	1	1	Mutant	Codel	methylated
CGGA_1060	227	1	42	Male	WHO IV	rGBM	0	1	Mutant	Non-codel	methylated
CGGA_1061	532	1	43	Female	WHO III	rAA	0	1	Mutant	Non-codel	un-methylated
CGGA_1068	68	1	29	Male	WHO IV	sGBM	0	0	Mutant	Non-codel	methylated
CGGA_1094	252	1	40	Female	WHO III	rAA	0	1	Mutant	Non-codel	methylated
CGGA_1105	609	1	29	Male	WHO IV	sGBM	1	1	Mutant	Non-codel	methylated
CGGA_1113	1265	1	34	Male	WHO III	AO	0	1	Mutant	Codel	methylated
CGGA_1129	168	1	34	Male	WHO IV	sGBM	1	0	Mutant	Non-codel	methylated
CGGA_1136	236	1	38	Female	WHO IV	sGBM	0	1	Mutant	Non-codel	methylated
CGGA_1146	2498	0	35	Male	WHO III	AA	1	0	Mutant	Non-codel	methylated
CGGA_1160	426	1	43	Female	WHO III	AA	NA	NA	Mutant	Non-codel	un-methylated
CGGA_1170	346	1	25	Male	WHO IV	sGBM	1	1	Mutant	Non-codel	methylated
CGGA_1175	441	1	36	Female	WHO IV	sGBM	0	1	Mutant	Non-codel	methylated
CGGA_1189	3082	0	34	Female	WHO III	AO	0	1	Mutant	Codel	methylated
CGGA_1190	3082	0	45	Female	WHO III	AA	0	1	Mutant	Non-codel	methylated
CGGA_1215	29	1	37	Male	WHO III	rAA	1	1	Mutant	Non-codel	methylated
CGGA_1219	2120	1	57	Female	WHO IV	GBM	1	1	Mutant	Non-codel	methylated
CGGA_1227	1197	1	46	Female	WHO IV	rGBM	1	1	Wildtype	Non-codel	methylated
CGGA_1231	2279	1	31	Female	WHO III	rAA	1	1	Wildtype	Non-codel	un-methylated
CGGA_1287	533	1	29	Male	WHO IV	GBM	1	1	Mutant	Non-codel	un-methylated
CGGA_1307	965	0	25	Female	WHO III	AA	1	1	Mutant	Non-codel	un-methylated
CGGA_1314	172	1	27	Female	WHO IV	GBM	0	0	Mutant	Non-codel	methylated
CGGA_1322	253	1	10	Male	WHO III	AA	1	1	Mutant	Non-codel	methylated
CGGA_1324	848	1	42	Male	WHO IV	sGBM	1	1	Mutant	Codel	methylated
CGGA_1329	326	1	43	Female	WHO III	rAA	1	1	Mutant	Non-codel	methylated
CGGA_1330	2846	0	47	Male	WHO II	A	1	1	Mutant	Non-codel	methylated
CGGA_1374	141	1	22	Male	WHO III	rAA	1	0	Mutant	Non-codel	methylated
CGGA_1375	92	1	50	Female	WHO IV	sGBM	1	0	Mutant	Non-codel	methylated
CGGA_1381	46	1	36	Female	WHO IV	rGBM	1	1	Mutant	Non-codel	methylated
CGGA_1384	191	1	39	Female	WHO IV	GBM	1	1	Mutant	Non-codel	methylated
CGGA_1388	485	1	37	Male	WHO III	rAA	1	1	Mutant	Non-codel	methylated
CGGA_1394	139	1	37	Male	WHO IV	rGBM	1	1	Mutant	Non-codel	methylated
CGGA_1406	2154	1	34	Male	WHO II	A	1	1	Mutant	Non-codel	methylated
CGGA_1409	2727	0	24	Female	WHO IV	GBM	0	1	Mutant	Non-codel	un-methylated
CGGA_1412	296	1	48	Female	WHO IV	sGBM	1	1	Mutant	Codel	methylated
CGGA_171	NA	NA	37	Female	WHO II	O	0	NA	Mutant	Codel	un-methylated
CGGA_236	706	0	47	Male	WHO II	O	1	1	Mutant	Codel	methylated
CGGA_241	4809	0	34	Male	WHO II	A	1	0	Mutant	Non-codel	methylated
CGGA_245	318	1	39	Female	WHO III	rAA	1	1	Mutant	Non-codel	NA
CGGA_251	1299	0	45	Male	WHO II	A	1	0	Mutant	Non-codel	methylated
CGGA_252	165	0	24	Female	WHO II	A	1	0	Mutant	Non-codel	un-methylated
CGGA_254	4793	0	38	Male	WHO II	O	1	1	Mutant	Codel	methylated
CGGA_256	158	0	39	Male	WHO II	A	1	1	Mutant	Non-codel	un-methylated
CGGA_261	4130	0	27	Male	WHO II	A	1	0	Mutant	Non-codel	un-methylated
[truncated: 127 more rows]

## Sheet: Supplementary Table 2
Supplementary Table 2: Clinical information of glioma patients from Rembrandt dataset
ID	Histology	Grade	Gender	Age	futime	fustat	1p19q_Codeletion_status
HF0048_U133P2	GBM	WHO I	Male	30-34	1770	1	NA
HF0268_U133P2	GBM	WHO I	Female	45-49	657	1	NA
X00715851_U133P2	NA	NA	NA	NA	NA	NA	NA
X03437595_U133P2	NA	NA	NA	NA	NA	NA	NA
X03460111_U133P2	NA	NA	NA	NA	NA	NA	NA
X03463522_U133P2	NA	NA	NA	NA	NA	NA	NA
E09296_U133P2	A	WHO II	Female	45-49	NA	0	Non-codel
E09398_U133P2	A	WHO II	Male	25-29	NA	0	Non-codel
E09471_U133P2	A	WHO II	Male	70-74	815	1	Non-codel
E09542_U133P2	A	WHO II	Male	35-39	NA	NA	NA
E09673_U133P2	A	WHO II	Male	45-49	6415	0	Non-codel
E09797_U133P2	A	WHO II	Male	35-39	NA	NA	NA
E09811_U133P2	A	WHO II	Male	50-54	NA	NA	Non-codel
E10025_U133P2	A	WHO II	Male	40-44	NA	NA	Non-codel
E10483_U133P2	A	WHO II	Male	25-29	1993	1	Non-codel
HF0022_U133P2	A	WHO II	Male	20-24	4016	0	NA
HF0026_U133P2	A	WHO II	Female	60-64	1712	1	NA
HF0223_U133P2	A	WHO II	Male	45-49	1292	1	NA
HF0252_U133P2_2	A	WHO II	Male	NA	3693	0	NA
HF0305_U133P2	A	WHO II	Male	30-34	1475	1	NA
HF0316_U133P2	A	WHO II	Male	40-44	2201	1	NA
HF0329_U133P2	A	WHO II	Female	30-34	NA	NA	NA
HF0332_U133P2	A	WHO II	Male	30-34	NA	NA	NA
HF0434_U133P2	A	WHO II	Male	60-64	183	1	NA
HF0450_U133P2	A	WHO II	NA	30-34	885	1	NA
HF0488_U133P2	A	WHO II	NA	35-39	NA	NA	NA
HF0491_U133P2	A	WHO II	NA	30-34	NA	NA	NA
HF0606_U133P2	A	WHO II	NA	30-34	2303	1	NA
HF0608_U133P2	A	WHO II	Male	50-54	317	1	NA
HF0639_U133P2	A	WHO II	NA	40-44	NA	NA	NA
HF0670_U133P2	A	WHO II	Male	50-54	2890	0	NA
HF0726_U133P2	A	WHO II	Male	35-39	2682	0	NA
HF0757_U133P2	A	WHO II	NA	40-44	2246	1	NA
HF0778_U133P2	A	WHO II	NA	65-69	242	1	NA
HF0802_U133P2	A	WHO II	NA	30-34	2641	0	NA
HF0822_U133P2	A	WHO II	NA	35-39	NA	NA	NA
HF0844_U133P2	A	WHO II	NA	30-34	1915	1	NA
HF0855_U133P2	A	WHO II	Male	55-59	411	1	NA
HF0899_U133P2	A	WHO II	Male	55-59	2001	1	NA
HF0914_U133P2	A	WHO II	Male	40-44	4407	0	NA
HF0931_U133P2	A	WHO II	Female	35-39	3570	0	NA
HF0936_U133P2	A	WHO II	Male	55-59	152	1	NA
HF0953_U133P2_2	A	WHO II	Male	NA	1337	1	NA
HF0982_U133P2	A	WHO II	Male	65-69	457	1	NA
HF1000_U133P2	A	WHO II	Male	30-34	1209	1	NA
HF1156_U133P2	A	WHO II	Female	30-34	3160	0	NA
HF1235_U133P2	A	WHO II	Male	35-39	2951	0	NA
HF1246_U133P2	A	WHO II	Male	65-69	6	1	NA
HF1316_U133P2	A	WHO II	Female	70-74	207	1	NA
HF1319_U133P2	A	WHO II	NA	35-39	NA	NA	NA
HF1325_U133P2	A	WHO II	Female	35-39	2535	0	NA
HF1334_U133P2	A	WHO II	Female	20-24	3471	1	NA
HF1344_U133P2	A	WHO II	NA	60-64	269	1	NA
HF1345_U133P2	A	WHO II	Female	15-19	2505	0	NA
HF1366_U133P2	A	WHO II	NA	15-19	NA	NA	NA
HF1380_U133P2	A	WHO II	NA	35-39	NA	NA	NA
HF1381_U133P2	A	WHO II	Male	25-29	4086	0	NA
HF1407_U133P2	A	WHO II	Female	55-59	155	1	NA
HF1442_U133P2	A	WHO II	Male	35-39	1416	1	NA
HF1489_U133P2	A	WHO II	Female	50-54	2049	1	NA
HF1511_U133P2	A	WHO II	Male	25-29	1698	1	NA
HF1551_U133P2	A	WHO II	Female	30-34	2127	0	NA
HF1568_U133P2	A	WHO II	Female	30-34	1278	1	NA
HF1588_U133P2	A	WHO II	Male	40-44	2257	0	NA
HF1606_U133P2	A	WHO II	Male	60-64	2209	0	NA
HF1677_U133P2	A	WHO II	Male	50-54	1905	0	NA
HF1708_U133P2	A	WHO II	Male	20-24	2033	0	NA
E09358_U133P2	MIXED	WHO II	Female	50-54	3814	0	Codel
E09440_U133P2	MIXED	WHO II	Male	30-34	NA	0	Codel
E09688_U133P2	MIXED	WHO II	Female	35-39	1525	1	Non-codel
HF0183_U133P2	MIXED	WHO II	Female	50-54	NA	NA	NA
X03436958_U133P2	NA	NA	NA	NA	NA	NA	NA
X03465304_U133P2	NA	NA	NA	NA	NA	NA	NA
X03471616_U133P2	NA	NA	NA	NA	NA	NA	NA
E09503_U133P2	O	WHO II	Female	45-49	NA	NA	Non-codel
E09661_U133P2	O	WHO II	Male	35-39	1454	0	NA
E09699_U133P2	O	WHO II	Female	25-29	NA	NA	NA
E09755_U133P2	O	WHO II	Female	35-39	NA	NA	Non-codel
E09804_U133P2	O	WHO II	Female	30-34	1273	0	Codel
E09860_U133P2	O	WHO II	Female	35-39	1105	0	Codel
E09867_U133P2	O	WHO II	Female	60-64	1160	0	Codel
E09890_U133P2	O	WHO II	Male	55-59	54	NA	Codel
E09937_U133P2	O	WHO II	Male	50-54	NA	NA	Non-codel
E09949_U133P2	O	WHO II	Male	35-39	NA	NA	NA
E10011_U133P2	O	WHO II	Male	30-34	NA	NA	Codel
E10021_U133P2	O	WHO II	Female	40-44	NA	NA	Codel
E10054_U133P2	O	WHO II	Female	55-59	NA	0	Codel
HF0218_U133P2	O	WHO II	NA	70-74	NA	NA	NA
HF0285_U133P2	O	WHO II	Male	60-64	432	1	NA
HF0291_U133P2	O	WHO II	NA	50-54	2836	1	NA
HF0327_U133P2	O	WHO II	Male	70-74	587	1	NA
HF0510_U133P2	O	WHO II	NA	70-74	587	1	NA
HF0599_U133P2	O	WHO II	NA	50-54	1284	1	NA
HF0835_U133P2	O	WHO II	Female	35-39	1359	1	NA
HF0897_U133P2	O	WHO II	NA	30-34	NA	NA	NA
HF0920_U133P2	O	WHO II	Female	85-89	30	1	NA
HF0960_U133P2	O	WHO II	Female	30-34	2661	1	NA
HF0962_U133P2	O	WHO II	Male	30-34	3495	0	NA
HF1167_U133P2	O	WHO II	Male	45-49	537	1	NA
HF1227_U133P2	O	WHO II	Female	25-29	7552	0	NA
HF1487_U133P2	O	WHO II	NA	60-64	298	1	NA
X03421899_U133P2	NA	NA	NA	NA	NA	NA	NA
X03441740_U133P2	NA	NA	NA	NA	NA	NA	NA
X03461078_U133P2	NA	NA	NA	NA	NA	NA	NA
X03477889_U133P2	NA	NA	NA	NA	NA	NA	NA
X03484270_U133P2	NA	NA	NA	NA	NA	NA	NA
X547038_U133P2	NA	NA	NA	NA	NA	NA	NA
X548457_U133P2	NA	NA	NA	NA	NA	NA	NA
X550239_U133P2	NA	NA	NA	NA	NA	NA	NA
X550715_U133P2	NA	NA	NA	NA	NA	NA	NA
X554082_U133P2	NA	NA	NA	NA	NA	NA	NA
X570013_U133P2	NA	NA	NA	NA	NA	NA	NA
E09239_U133P2	AA	WHO III	Male	30-34	1899	1	Non-codel
E09393_U133P2	AA	WHO III	Male	30-34	NA	0	Non-codel
E09408_U133P2	AA	WHO III	Female	30-34	NA	NA	NA
E09743_U133P2	AA	WHO III	Female	40-44	NA	NA	Non-codel
E09801_U133P2	AA	WHO III	Male	30-34	1276	1	Codel
E09826_U133P2	AA	WHO III	Male	40-44	689	1	Non-codel
E09855_U133P2	AA	WHO III	Male	25-29	1153	0	Non-codel
E09914_U133P2	AA	WHO III	Male	35-39	NA	NA	Non-codel
E09920_U133P2_2	AA	WHO III	Male	NA	1782	1	NA
E09948_U133P2	AA	WHO III	Male	35-39	NA	NA	Non-codel
E09959_U133P2	AA	WHO III	Male	50-54	1393	1	NA
E09966_U133P2	AA	WHO III	Female	55-59	532	1	Non-codel
E10062_U133P2	AA	WHO III	Female	70-74	NA	NA	Codel
E10105_U133P2	AA	WHO III	Male	40-44	32	NA	Non-codel
E10162_U133P2	AA	WHO III	Female	55-59	463	NA	Non-codel
E10615_U133P2	AA	WHO III	Male	45-49	NA	NA	Codel
E10645_U133P2	AA	WHO III	Male	25-29	NA	NA	Non-codel
HF0017_U133P2	AA	WHO III	Male	45-49	3996	0	NA
HF0087_U133P2	AA	WHO III	Female	60-64	2365	1	NA
HF0089_U133P2	AA	WHO III	Female	65-69	237	1	NA
HF0108_U133P2	AA	WHO III	NA	35-39	3960	0	NA
HF0152_U133P2	AA	WHO III	NA	30-34	3946	0	NA
HF0244_U133P2	AA	WHO III	Male	60-64	225	1	NA
HF0435_U133P2	AA	WHO III	NA	40-44	3315	0	NA
HF0702_U133P2	AA	WHO III	NA	50-54	256	1	NA
HF0850_U133P2	AA	WHO III	NA	NA	NA	NA	NA
HF0954.2_U133P2	AA	WHO III	NA	NA	329	1	NA
HF0966_U133P2	AA	WHO III	Male	50-54	4131	0	NA
HF0975_U133P2	AA	WHO III	NA	60-64	1096	1	NA
HF1032_U133P2	AA	WHO III	Male	40-44	843	1	NA
HF1136_U133P2	AA	WHO III	Female	35-39	1359	1	NA
HF1150_U133P2	AA	WHO III	Male	70-74	636	1	NA
HF1185_U133P2	AA	WHO III	Female	25-29	2856	0	NA
HF1186_U133P2	AA	WHO III	Male	30-34	603	1	NA
HF1232_U133P2	AA	WHO III	Female	50-54	606	1	NA
HF1242_U133P2	AA	WHO III	Male	35-39	4470	1	NA
HF1255_U133P2	AA	WHO III	Female	45-49	104	1	NA
HF1280_U133P2	AA	WHO III	Female	40-44	473	1	NA
HF1286_U133P2	AA	WHO III	NA	75-79	395	1	NA
HF1295_U133P2	AA	WHO III	Female	55-59	573	1	NA
HF1409_U133P2	AA	WHO III	Male	50-54	381	1	NA
HF1475_U133P2	AA	WHO III	Male	15-19	951	1	NA
HF1490_U133P2	AA	WHO III	Male	65-69	120	1	NA
HF1494_U133P2	AA	WHO III	Male	30-34	1023	1	NA
HF1581_U133P2	AA	WHO III	NA	65-69	7	1	NA
HF1587_U133P2	AA	WHO III	Male	30-34	2258	0	NA
HF1613_U133P2	AA	WHO III	Male	35-39	2004	1	NA
E09334_U133P2	MIXED	WHO III	Male	40-44	2557	1	NA
E09394_U133P2	MIXED	WHO III	Male	35-39	1550	1	NA
E09511_U133P2	MIXED	WHO III	Male	45-49	370	1	Non-codel
X03480779_U133P2	NA	NA	NA	NA	NA	NA	NA
X508984_U133P2	NA	NA	NA	NA	NA	NA	NA
X549279_U133P2	NA	NA	NA	NA	NA	NA	NA
E08021_U133P2	AO	WHO III	Female	30-34	2446	1	Codel
E09419_U133P2	AO	WHO III	Male	50-54	NA	0	Codel
E09448_U133P2	AO	WHO III	Female	40-44	6873	1	Codel
E09656_U133P2	AO	WHO III	Male	40-44	1024	1	Non-codel
E09681_U133P2	AO	WHO III	Female	35-39	3365	0	Non-codel
E09893_U133P2	AO	WHO III	Female	35-39	3356	1	Codel
E09988_U133P2	AO	WHO III	Male	20-24	1939	1	Non-codel
E10001_U133P2	AO	WHO III	Male	25-29	261	1	Non-codel
HF0184_U133P2	AO	WHO III	NA	50-54	359	1	NA
HF0251_U133P2	AO	WHO III	NA	50-54	682	1	NA
HF0460_U133P2	AO	WHO III	NA	55-59	321	1	NA
HF0816_U133P2	AO	WHO III	NA	45-49	1401	1	NA
HF0828_U133P2	AO	WHO III	Male	35-39	NA	NA	NA
HF1057_U133P2	AO	WHO III	Female	60-64	735	1	NA
HF1090_U133P2	AO	WHO III	NA	60-64	255	1	NA
HF1357_U133P2	AO	WHO III	Male	20-24	924	1	NA
HF1458_U133P2	AO	WHO III	Male	45-49	265	1	NA
HF1493_U133P2	AO	WHO III	Female	70-74	1257	1	NA
HF1502_U133P2	AO	WHO III	Female	35-39	192	1	NA
HF1702_U133P2	AO	WHO III	Female	75-79	162	1	NA
X545226_U133P2	NA	NA	NA	NA	NA	NA	NA
X602958_U133P2	NA	NA	NA	NA	NA	NA	NA
X607103_U133P2	NA	NA	NA	NA	NA	NA	NA
X607216_U133P2	NA	NA	NA	NA	NA	NA	NA
X608660_U133P2	NA	NA	NA	NA	NA	NA	NA
E09137_U133P2	GBM	WHO IV	Male	50-54	NA	1	NA
E09137B_U133P2	NA	NA	NA	NA	NA	NA	NA
E09138_U133P2	GBM	WHO IV	Male	50-54	NA	1	NA
E09192_U133P2	GBM	WHO IV	Female	35-39	402	1	Non-codel
E09214_U133P2	GBM	WHO IV	Female	50-54	NA	1	Non-codel
E09233_U133P2	GBM	WHO IV	Male	50-54	NA	1	Non-codel
E09278_U133P2	GBM	WHO IV	Male	30-34	1097	0	Codel
E09278B_U133P2	NA	NA	NA	NA	NA	NA	NA
E09331_U133P2	GBM	WHO IV	Male	35-39	1166	0	NA
E09369_U133P2	GBM	WHO IV	Female	55-59	NA	0	Non-codel
E09405_U133P2	GBM	WHO IV	Male	40-44	NA	0	Non-codel
E09449_U133P2	GBM	WHO IV	Male	50-54	NA	0	Non-codel
E09451_U133P2	GBM	WHO IV	Male	65-69	160	1	NA
E09478_U133P2	GBM	WHO IV	Female	60-64	NA	1	NA
E09483_U133P2	GBM	WHO IV	Female	45-49	310	1	Non-codel
E09489_U133P2	GBM	WHO IV	Male	55-59	470	1	Non-codel
E09535_U133P2	GBM	WHO IV	Female	40-44	600	1	Non-codel
E09569_U133P2	GBM	WHO IV	Male	45-49	1121	1	Non-codel
E09601_U133P2	GBM	WHO IV	Male	40-44	395	1	Codel
E09602_U133P2	GBM	WHO IV	Male	70-74	123	1	Non-codel
E09605_U133P2	GBM	WHO IV	Male	60-64	1780	1	Non-codel
E09606_U133P2	GBM	WHO IV	Male	50-54	399	1	Non-codel
E09610_U133P2	GBM	WHO IV	Male	55-59	376	1	NA
E09615_U133P2	GBM	WHO IV	Male	45-49	889	1	Non-codel
E09622_U133P2	GBM	WHO IV	Male	65-69	NA	1	Non-codel
E09624_U133P2	GBM	WHO IV	Male	40-44	NA	0	Non-codel
E09647_U133P2	GBM	WHO IV	Male	70-74	580	1	Non-codel
E09649_U133P2	GBM	WHO IV	Male	45-49	290	1	Non-codel
E09654_U133P2	GBM	WHO IV	Female	65-69	218	1	NA
E09655_U133P2	GBM	WHO IV	Male	50-54	NA	1	Non-codel
E09680_U133P2	GBM	WHO IV	Male	65-69	NA	1	Non-codel
E09690_U133P2	GBM	WHO IV	Male	40-44	1869	0	Codel
E09698_U133P2	GBM	WHO IV	Male	75-79	124	NA	Non-codel
E09722_U133P2	GBM	WHO IV	Female	35-39	856	1	Non-codel
E09730_U133P2	GBM	WHO IV	Male	40-44	1851	1	Non-codel
E09740_U133P2	GBM	WHO IV	Female	35-39	504	1	Non-codel
E09742_U133P2	GBM	WHO IV	Male	45-49	NA	1	Non-codel
E09744_U133P2	GBM	WHO IV	Female	55-59	1405	1	Non-codel
E09752_U133P2	GBM	WHO IV	Male	55-59	NA	NA	Non-codel
E09756_U133P2	GBM	WHO IV	Female	70-74	NA	1	Non-codel
E09759_U133P2	GBM	WHO IV	Male	45-49	602	1	Non-codel
E09782_U133P2	GBM	WHO IV	Male	50-54	520	0	Non-codel
E09786_U133P2	GBM	WHO IV	Male	50-54	1390	1	Non-codel
E09787_U133P2	GBM	WHO IV	Female	35-39	2594	0	NA
E09791_U133P2	GBM	WHO IV	Male	55-59	401	1	Non-codel
E09800_U133P2	GBM	WHO IV	Male	65-69	698	1	Non-codel
E09802_U133P2	GBM	WHO IV	Male	60-64	965	1	Non-codel
E09810_U133P2	GBM	WHO IV	Male	60-64	570	1	Non-codel
E09825_U133P2	GBM	WHO IV	Female	80-84	NA	1	Non-codel
E09829_U133P2	GBM	WHO IV	Female	55-59	NA	1	Non-codel
E09832_U133P2	GBM	WHO IV	Male	65-69	168	1	Non-codel
E09833_U133P2	GBM	WHO IV	Male	50-54	624	1	Non-codel
E09833B_U133P2	NA	NA	NA	NA	NA	NA	NA
E09842_U133P2	GBM	WHO IV	Male	65-69	NA	1	Non-codel
E09847_U133P2	GBM	WHO IV	Female	65-69	924	1	Non-codel
E09857_U133P2	GBM	WHO IV	Male	65-69	NA	1	Non-codel
E09862_U133P2	GBM	WHO IV	Female	80-84	NA	1	Non-codel
E09906_U133P2	GBM	WHO IV	Male	55-59	NA	1	Non-codel
E09907_U133P2	GBM	WHO IV	Male	35-39	1656	1	Non-codel
E09907B_U133P2	NA	NA	NA	NA	NA	NA	NA
E09938_U133P2	GBM	WHO IV	Male	45-49	756	1	NA
E09967_U133P2	GBM	WHO IV	Female	50-54	132	1	NA
E10002_U133P2	GBM	WHO IV	Male	60-64	251	1	Non-codel
E10012_U133P2	GBM	WHO IV	Male	70-74	NA	1	Non-codel
E10031_U133P2	GBM	WHO IV	Male	50-54	826	1	Non-codel
E10144_U133P2	GBM	WHO IV	Female	45-49	778	1	Non-codel
E10444_U133P2	GBM	WHO IV	Male	40-44	509	1	Non-codel
E10462_U133P2	GBM	WHO IV	Female	55-59	1077	1	NA
E10488_U133P2	GBM	WHO IV	Female	55-59	656	1	Non-codel
HF0024_U133P2	GBM	WHO IV	Female	75-79	173	1	NA
HF0031_U133P2	GBM	WHO IV	NA	65-69	15	1	NA
HF0050_U133P2	GBM	WHO IV	Female	50-54	787	1	NA
HF0066_U133P2	GBM	WHO IV	NA	55-59	274	1	NA
HF0138_U133P2	GBM	WHO IV	NA	75-79	37	1	NA
HF0142_U133P2	GBM	WHO IV	NA	70-74	8	1	NA
HF0180_U133P2	GBM	WHO IV	NA	70-74	10	1	NA
HF0212_U133P2	GBM	WHO IV	NA	60-64	NA	NA	NA
HF0300.3_U133P2	GBM	WHO IV	NA	NA	1736	1	NA
HF0408_U133P2	GBM	WHO IV	NA	55-59	475	1	NA
HF0442.5_U133P2	GBM	WHO IV	Male	NA	588	1	NA
HF0445_U133P2	GBM	WHO IV	Female	30-34	1416	1	NA
HF0505_U133P2	GBM	WHO IV	NA	75-79	96	1	NA
HF0520_U133P2	GBM	WHO IV	NA	60-64	262	1	NA
HF0543_U133P2	GBM	WHO IV	Male	50-54	2028	0	NA
HF0583_U133P2	GBM	WHO IV	NA	60-64	473	1	NA
HF0627_U133P2	GBM	WHO IV	Male	45-49	321	1	NA
HF0654_U133P2	GBM	WHO IV	NA	55-59	439	1	NA
HF0790_U133P2	GBM	WHO IV	Female	70-74	225	1	NA
HF0891_U133P2	GBM	WHO IV	NA	45-49	864	1	NA
HF0894_U133P2	GBM	WHO IV	Male	55-59	424	1	NA
HF0963_U133P2	GBM	WHO IV	NA	75-79	318	1	NA
HF0986_U133P2	GBM	WHO IV	Female	35-39	1872	1	NA
HF0990_U133P2	GBM	WHO IV	Female	40-44	2648	1	NA
HF0992_U133P2	GBM	WHO IV	NA	75-79	599	1	NA
HF0996_U133P2	GBM	WHO IV	Female	50-54	3614	0	NA
HF1058_U133P2	GBM	WHO IV	Female	50-54	541	1	NA
HF1077_U133P2	GBM	WHO IV	Male	40-44	2201	1	NA
HF1078_U133P2	GBM	WHO IV	Male	45-49	683	1	NA
HF1097_U133P2	GBM	WHO IV	Female	50-54	270	1	NA
HF1122_U133P2	GBM	WHO IV	Male	35-39	219	1	NA
HF1137_U133P2	GBM	WHO IV	Female	70-74	549	1	NA
HF1139_U133P2	GBM	WHO IV	Female	40-44	473	1	NA
HF1178_U133P2	GBM	WHO IV	NA	70-74	474	1	NA
HF1191_U133P2	GBM	WHO IV	Female	70-74	9	1	NA
HF1220_U133P2	GBM	WHO IV	Male	60-64	313	1	NA
HF1262_U133P2	GBM	WHO IV	NA	55-59	712	1	NA
HF1269_U133P2	GBM	WHO IV	Male	45-49	390	1	NA
HF1292_U133P2	GBM	WHO IV	Male	45-49	1731	1	NA
HF1297_U133P2	GBM	WHO IV	Female	60-64	515	1	NA
HF1318_U133P2	GBM	WHO IV	Male	50-54	231	1	NA
HF1338_U133P2	GBM	WHO IV	Male	50-54	178	1	NA
HF1356_U133P2	GBM	WHO IV	NA	55-59	406	1	NA
HF1382_U133P2	GBM	WHO IV	Female	60-64	1448	1	NA
HF1397_U133P2	GBM	WHO IV	Female	60-64	901	1	NA
HF1469_U133P2	GBM	WHO IV	Female	45-49	665	1	NA
HF1492_U133P2	GBM	WHO IV	Male	80-84	67	1	NA
HF1509_U133P2	GBM	WHO IV	NA	55-59	81	1	NA
HF1517_U133P2	GBM	WHO IV	Female	55-59	249	1	NA
HF1534_U133P2	GBM	WHO IV	NA	55-59	233	1	NA
HF1538_U133P2	GBM	WHO IV	Male	70-74	96	1	NA
HF1540_U133P2	GBM	WHO IV	Male	75-79	307	1	NA
HF1585_U133P2	GBM	WHO IV	Female	60-64	598	1	NA
HF1589_U133P2	GBM	WHO IV	NA	65-69	100	1	NA
HF1608_U133P2	GBM	WHO IV	NA	50-54	238	1	NA
HF1618_U133P2	GBM	WHO IV	NA	50-54	71	1	NA
HF1628_U133P2	GBM	WHO IV	Male	45-49	438	1	NA
HF1640_U133P2	GBM	WHO IV	NA	65-69	164	1	NA
HF1667_U133P2	GBM	WHO IV	NA	65-69	74	1	NA
HF1671_U133P2	GBM	WHO IV	Male	65-69	399	1	NA
X548092_U133P2	NA	NA	NA	NA	NA	NA	NA
E09212_U133P2	A	NA	Male	40-44	212	1	NA
E09231_U133P2	A	NA	Male	55-59	NA	1	Non-codel
E09515_U133P2	A	NA	Male	35-39	1963	0	Non-codel
E09531_U133P2	A	NA	Male	55-59	578	1	Non-codel
E09818_U133P2	A	NA	Male	30-34	1144	0	NA
E09819_U133P2	A	NA	Male	60-64	326	1	Non-codel
E09892_U133P2	A	NA	Female	20-24	1165	0	Non-codel
E09921_U133P2	A	NA	Female	40-44	1093	0	Non-codel
E09997_U133P2	A	NA	Female	35-39	1407	0	Non-codel
E10103_U133P2	A	NA	Male	50-54	98	1	Non-codel
E10138_U133P2	A	NA	Male	25-29	1406	0	Non-codel
E10182_U133P2	A	NA	Male	25-29	NA	NA	Non-codel
E10192_U133P2	A	NA	Female	20-24	NA	NA	Non-codel
E10196_U133P2	A	NA	Female	25-29	NA	NA	Non-codel
E10216_U133P2	A	NA	Female	55-59	NA	NA	Non-codel
E10248_U133P2	A	NA	Male	25-29	NA	NA	Non-codel
E10285_U133P2	A	NA	Male	25-29	NA	NA	Non-codel
E10286_U133P2	A	NA	Male	30-34	NA	NA	Non-codel
E10299_U133P2	A	NA	Female	40-44	1338	0	Non-codel
E10362_U133P2	A	NA	Female	30-34	NA	NA	Non-codel
E10482_U133P2	A	NA	Male	40-44	NA	NA	Non-codel
E10540_U133P2	A	NA	Male	40-44	NA	NA	Non-codel
E10556_U133P2	A	NA	Male	40-44	NA	NA	Codel
E10710_U133P2	A	NA	Male	50-54	NA	NA	NA
X00518392_U133P2	NA	NA	NA	NA	NA	NA	NA
X00641238_U133P2	NA	NA	NA	NA	NA	NA	NA
X01074569_U133P2	NA	NA	NA	NA	NA	NA	NA
X01113810_U133P2	NA	NA	NA	NA	NA	NA	NA
X03184579_U133P2	NA	NA	NA	NA	NA	NA	NA
X03272709_U133P2	NA	NA	NA	NA	NA	NA	NA
X03352571_U133P2	NA	NA	NA	NA	NA	NA	NA
X03418160_U133P2	NA	NA	NA	NA	NA	NA	NA
X03425149_U133P2	NA	NA	NA	NA	NA	NA	NA
X03431712_U133P2	NA	NA	NA	NA	NA	NA	NA
X03431774_U133P2	NA	NA	NA	NA	NA	NA	NA
X03434766_U133P2	NA	NA	NA	NA	NA	NA	NA
X03439543_U133P2	NA	NA	NA	NA	NA	NA	NA
X03441358_U133P2	NA	NA	NA	NA	NA	NA	NA
X03444255_U133P2	NA	NA	NA	NA	NA	NA	NA
X03448110_U133P2	NA	NA	NA	NA	NA	NA	NA
X03448110B_U133P2	NA	NA	NA	NA	NA	NA	NA
X03451592_U133P2	NA	NA	NA	NA	NA	NA	NA
X03461404_U133P2	NA	NA	NA	NA	NA	NA	NA
X03463812_U133P2	NA	NA	NA	NA	NA	NA	NA
X03466950_U133P2	NA	NA	NA	NA	NA	NA	NA
X03468400_U133P2	NA	NA	NA	NA	NA	NA	NA
X03473067_U133P2	NA	NA	NA	NA	NA	NA	NA
X03473405_U133P2	NA	NA	NA	NA	NA	NA	NA
X03474525_U133P2	NA	NA	NA	NA	NA	NA	NA
X03479212_U133P2	NA	NA	NA	NA	NA	NA	NA
X03484586_U133P2	NA	NA	NA	NA	NA	NA	NA
X03486876_U133P2	NA	NA	NA	NA	NA	NA	NA
X621233_U133P2	NA	NA	NA	NA	NA	NA	NA
X88295267_U133P2	NA	NA	NA	NA	NA	NA	NA
X88375506_U133P2	NA	NA	NA	NA	NA	NA	NA
E09139_U133P2	GBM	WHO IV	Female	50-54	1095	1	NA
E09348_U133P2	GBM	WHO IV	Male	60-64	555	1	Non-codel
E09430_U133P2	GBM	WHO IV	Female	50-54	961	1	NA
E09454_U133P2	GBM	WHO IV	Male	55-59	539	1	Non-codel
E09623_U133P2	GBM	WHO IV	Male	65-69	621	1	NA
E09670_U133P2	GBM	WHO IV	Male	70-74	425	1	Non-codel
E09846_U133P2	GBM	WHO IV	Male	70-74	429	1	Non-codel
E09852_U133P2	GBM	WHO IV	Female	45-49	1448	1	Non-codel
E09917_U133P2_2	GBM	WHO IV	Male	NA	183	1	Non-codel
E09930_U133P2	GBM	WHO IV	Female	55-59	153	1	Non-codel
E09951_U133P2	GBM	WHO IV	Male	45-49	677	1	NA
E09956_U133P2	GBM	WHO IV	Male	45-49	631	1	Non-codel
E10013_U133P2	GBM	WHO IV	Female	60-64	148	1	NA
E10016_U133P2	GBM	WHO IV	Female	50-54	885	1	Non-codel
E10026_U133P2	GBM	WHO IV	Male	65-69	463	1	Non-codel
E10029_U133P2	GBM	WHO IV	Male	70-74	NA	NA	Non-codel
E10041_U133P2	GBM	WHO IV	Male	20-24	245	1	Non-codel
E10077_U133P2	GBM	WHO IV	Male	30-34	775	1	Non-codel
E10102_U133P2	GBM	WHO IV	Male	50-54	1164	0	Non-codel
E10110_U133P2	GBM	WHO IV	Male	40-44	692	1	Non-codel
E10140_U133P2	GBM	WHO IV	Male	45-49	NA	NA	Non-codel
E10158_U133P2	GBM	WHO IV	Female	45-49	1219	0	Non-codel
E10172_U133P2	GBM	WHO IV	Male	55-59	NA	NA	Non-codel
E10184_U133P2	GBM	WHO IV	Female	50-54	850	1	NA
E10191_U133P2	GBM	WHO IV	Male	50-54	NA	NA	Non-codel
E10193_U133P2	GBM	WHO IV	Female	60-64	1025	NA	Non-codel
E10203_U133P2	GBM	WHO IV	Male	50-54	NA	1	Non-codel
E10211_U133P2	GBM	WHO IV	Male	40-44	852	1	Non-codel
E10226_U133P2	GBM	WHO IV	Female	75-79	560	1	NA
E10227_U133P2	GBM	WHO IV	Female	50-54	379	1	Non-codel
E10249_U133P2	GBM	WHO IV	Female	45-49	NA	NA	NA
E10250_U133P2	GBM	WHO IV	Female	85-89	181	NA	Non-codel
E10252_U133P2	GBM	WHO IV	Male	65-69	1591	1	Non-codel
E10252B_U133P2	NA	NA	NA	NA	NA	NA	NA
E10252C_NT_U133P2	NA	NA	NA	NA	NA	NA	NA
E10252C_T_U133P2	NA	NA	NA	NA	NA	NA	NA
E10258_U133P2	GBM	WHO IV	Male	70-74	618	1	Non-codel
E10262_U133P2	GBM	WHO IV	Female	45-49	540	1	Non-codel
E10264_U133P2	GBM	WHO IV	Male	60-64	NA	NA	Non-codel
E10267_U133P2	GBM	WHO IV	Female	30-34	360	1	NA
E10271_U133P2	GBM	WHO IV	Male	70-74	376	1	Non-codel
E10284_U133P2	GBM	WHO IV	Male	55-59	145	1	Non-codel
E10290_U133P2	GBM	WHO IV	Female	40-44	208	1	Non-codel
E10292_U133P2	GBM	WHO IV	Male	45-49	166	1	Non-codel
E10300_U133P2	GBM	WHO IV	Male	75-79	281	1	Non-codel
E10305_U133P2	GBM	WHO IV	Female	70-74	304	1	Non-codel
E10306_U133P2	GBM	WHO IV	Male	60-64	187	NA	Non-codel
E10312_U133P2	GBM	WHO IV	Male	35-39	1138	1	Non-codel
E10313_U133P2	GBM	WHO IV	Male	55-59	588	1	NA
E10318_U133P2	GBM	WHO IV	Male	55-59	791	NA	Non-codel
E10433_U133P2	GBM	WHO IV	Female	50-54	320	1	Non-codel
E10514_U133P2	GBM	WHO IV	Male	25-29	712	1	Non-codel
E10551_U133P2	GBM	WHO IV	Male	50-54	369	1	Non-codel
E10596_U133P2	GBM	WHO IV	Male	35-39	NA	NA	Non-codel
E10662_U133P2	GBM	WHO IV	Male	45-49	NA	NA	Non-codel
E10662B_U133P2	NA	NA	NA	NA	NA	NA	NA
E50057_U133P2	GBM	WHO IV	Male	60-64	524	1	Non-codel
E50074_U133P2	GBM	WHO IV	Male	60-64	163	1	Non-codel
E50091_U133P2	GBM	WHO IV	Male	55-59	415	1	Non-codel
E50123_U133P2_2	GBM	WHO IV	Female	NA	526	1	Non-codel
E09262_U133P2	MIXED	NA	Male	35-39	409	1	Non-codel
E09289_U133P2	MIXED	NA	Female	30-34	851	0	NA
E09848_U133P2	MIXED	NA	Female	40-44	NA	NA	NA
E10690_U133P2	MIXED	NA	Male	35-39	NA	NA	Non-codel
HF0088_U133P2	NON_TUMOR	NA	NA	60-64	4086	0	NA
HF0120_U133P2	NON_TUMOR	NA	NA	25-29	3951	0	NA
HF0131_U133P2	NON_TUMOR	NA	NA	35-39	NA	NA	NA
HF0137_U133P2	NON_TUMOR	NA	NA	45-49	3986	0	NA
HF0151_U133P2	NON_TUMOR	NA	NA	45-49	3944	0	NA
HF0163_U133P2	NON_TUMOR	NA	NA	30-34	3865	0	NA
HF0171_U133P2	NON_TUMOR	NA	NA	30-34	3851	0	NA
HF0178_U133P2	NON_TUMOR	NA	NA	30-34	NA	NA	NA
HF0211_U133P2	NON_TUMOR	NA	NA	40-44	3810	0	NA
HF0232_U133P2	NON_TUMOR	NA	NA	35-39	3720	0	NA
HF0295_U133P2	NON_TUMOR	NA	NA	40-44	5108	0	NA
HF0303_U133P2	NON_TUMOR	NA	NA	30-34	3605	0	NA
HF0377_U133P2	NON_TUMOR	NA	NA	25-29	3475	0	NA
HF0383_U133P2	NON_TUMOR	NA	NA	35-39	3484	0	NA
HF0467_U133P2	NON_TUMOR	NA	NA	20-24	3123	0	NA
HF0512_U133P2	NON_TUMOR	NA	NA	45-49	NA	NA	NA
HF0523_U133P2	NON_TUMOR	NA	NA	35-39	NA	NA	NA
HF0526_U133P2	NON_TUMOR	NA	NA	40-44	NA	NA	NA
HF0533_U133P2	NON_TUMOR	NA	NA	44848	NA	NA	NA
HF0593_U133P2	NON_TUMOR	NA	NA	15-19	NA	NA	NA
HF0616_U133P2	NON_TUMOR	NA	NA	NA	2939	0	NA
X03433293_U133P2	NA	NA	NA	NA	NA	NA	NA
X03437691_U133P2	NA	NA	NA	NA	NA	NA	NA
X03450728_U133P2_2	NA	NA	NA	NA	NA	NA	NA
X03476542_U133P2	NA	NA	NA	NA	NA	NA	NA
E09513_U133P2	O	NA	Female	50-54	402	1	NA
E09645_U133P2	O	NA	Male	45-49	1909	0	Non-codel
E09664_U133P2	O	NA	Male	40-44	812	1	Non-codel
E09858_U133P2	O	NA	Female	55-59	3886	0	Non-codel
E10072_U133P2	O	NA	Male	20-24	1116	0	Codel
E10097_U133P2	O	NA	Male	55-59	1097	0	NA
E10163_U133P2	O	NA	Male	55-59	NA	NA	Codel
E10278_U133P2	O	NA	Female	25-29	NA	NA	Codel
E10470_U133P2	O	NA	Male	25-29	NA	NA	Non-codel
E10691_U133P2	O	NA	Female	60-64	NA	NA	Codel
E10512_U133P2	NA	NA	NA	35-39	NA	NA	NA

## Sheet: Supplementary Table 3
Supplementary Table 3: Summary of 67 recognized necroptosis-related genes
Gene	Type	Source
FADD	necroptosis	necroptosis geneset M24779.gmt
FAS	necroptosis	necroptosis geneset M24779.gmt
FASLG	necroptosis	necroptosis geneset M24779.gmt
MLKL	necroptosis	necroptosis geneset M24779.gmt
RIPK1	necroptosis	necroptosis geneset M24779.gmt
RIPK3	necroptosis	necroptosis geneset M24779.gmt
TLR3	necroptosis	necroptosis geneset M24779.gmt
TNF	necroptosis	necroptosis geneset M24779.gmt
TSC1	necroptosis	Xie Y, Zhao Y, Shi L, Li W, Chen K, Li M, Chen X, Zhang H, Li T, Matsuzawa-Ishimoto Y, Yao X, Shao D, Ke Z, Li J, Chen Y, Zhang X, Cui J, Cui S, Leng Q, Cadwell K, Li X, Wei H, Zhang H, Li H, Xiao H. Gut epithelial TSC1/mTOR controls RIPK3-dependent necroptosis in intestinal inflammation and cancer. J Clin Invest. 2020 Apr 1;130(4):2111-2128. doi: 10.1172/JCI133264. PMID: 31961824.
TRIM11	necroptosis	Xie Y, Zhao Y, Shi L, Li W, Chen K, Li M, Chen X, Zhang H, Li T, Matsuzawa-Ishimoto Y, Yao X, Shao D, Ke Z, Li J, Chen Y, Zhang X, Cui J, Cui S, Leng Q, Cadwell K, Li X, Wei H, Zhang H, Li H, Xiao H. Gut epithelial TSC1/mTOR controls RIPK3-dependent necroptosis in intestinal inflammation and cancer. J Clin Invest. 2020 Apr 1;130(4):2111-2128. doi: 10.1172/JCI133264. PMID: 31961824.
CASP8	necroptosis	Newton K, Wickliffe KE, Dugger DL, Maltzman A, Roose-Girma M, Dohse M, Kőműves L, Webster JD, Dixit VM. Cleavage of RIPK1 by caspase-8 is crucial for limiting apoptosis and necroptosis. Nature. 2019 Oct;574(7778):428-431. doi: 10.1038/s41586-019-1548-x. Epub 2019 Sep 11. PMID: 31511692.
ZBP1	necroptosis	Banoth B, Tuladhar S, Karki R, Sharma BR, Briard B, Kesavardhana S, Burton A, Kanneganti TD. ZBP1 promotes fungi-induced inflammasome activation and pyroptosis, apoptosis, and necroptosis (PANoptosis). J Biol Chem. 2020 Dec 25;295(52):18276-18283. doi: 10.1074/jbc.RA120.015924. Epub 2020 Oct 27. PMID: 33109609.
MAPK8	necroptosis	Wang Y, Zhao M, He S, Luo Y, Zhao Y, Cheng J, Gong Y, Xie J, Wang Y, Hu B, Tian L, Liu X, Li C, Huang Q. Necroptosis regulates tumor repopulation after radiotherapy via RIP1/RIP3/MLKL/JNK/IL8 pathway. J Exp Clin Cancer Res. 2019 Nov 9;38(1):461. doi: 10.1186/s13046-019-1423-5. PMID: 31706322.
IPMK	necroptosis	Dovey CM, Diep J, Clarke BP, Hale AT, McNamara DE, Guo H, Brown NW Jr, Cao JY, Grace CR, Gough PJ, Bertin J, Dixon SJ, Fiedler D, Mocarski ES, Kaiser WJ, Moldoveanu T, York JD, Carette JE. MLKL Requires the Inositol Phosphate Code to Execute Necroptosis. Mol Cell. 2018 Jun 7;70(5):936-948.e7. doi: 10.1016/j.molcel.2018.05.010. Epub 2018 Jun 7. PMID: 29883610.
ITPK1	necroptosis	Dovey CM, Diep J, Clarke BP, Hale AT, McNamara DE, Guo H, Brown NW Jr, Cao JY, Grace CR, Gough PJ, Bertin J, Dixon SJ, Fiedler D, Mocarski ES, Kaiser WJ, Moldoveanu T, York JD, Carette JE. MLKL Requires the Inositol Phosphate Code to Execute Necroptosis. Mol Cell. 2018 Jun 7;70(5):936-948.e7. doi: 10.1016/j.molcel.2018.05.010. Epub 2018 Jun 7. PMID: 29883610.
SIRT3	necroptosis	Fu W, Li H, Fu H, Zhao S, Shi W, Sun M, Li Y. The SIRT3 and SIRT6 Promote Prostate Cancer Progression by Inhibiting Necroptosis-Mediated Innate Immune Response. J Immunol Res. 2020 Nov 17;2020:8820355. doi: 10.1155/2020/8820355. PMID: 33282964.
MYC	necroptosis	Xiong J, Wang L, Fei XC, Jiang XF, Zheng Z, Zhao Y, Wang CF, Li B, Chen SJ, Janin A, Gale RP, Zhao WL. MYC is a positive regulator of choline metabolism and impedes mitophagy-dependent necroptosis in diffuse large B-cell lymphoma. Blood Cancer J. 2017 Jul 7;7(7):e0. doi: 10.1038/bcj.2017.61. PMID: 28686226.
TNFRSF1A	necroptosis	Seifert L, Werba G, Tiwari S, Giao Ly NN, Alothman S, Alqunaibit D, Avanzi A, Barilla R, Daley D, Greco SH, Torres-Hernandez A, Pergamo M, Ochi A, Zambirinis CP, Pansari M, Rendon M, Tippens D, Hundeyin M, Mani VR, Hajdu C, Engle D, Miller G. The necrosome promotes pancreatic oncogenesis via CXCL1 and Mincle-induced immune suppression. Nature. 2016 Apr 14;532(7598):245-9. doi: 10.1038/nature17403…
TNFSF10	necroptosis	Seifert L, Werba G, Tiwari S, Giao Ly NN, Alothman S, Alqunaibit D, Avanzi A, Barilla R, Daley D, Greco SH, Torres-Hernandez A, Pergamo M, Ochi A, Zambirinis CP, Pansari M, Rendon M, Tippens D, Hundeyin M, Mani VR, Hajdu C, Engle D, Miller G. The necrosome promotes pancreatic oncogenesis via CXCL1 and Mincle-induced immune suppression. Nature. 2016 Apr 14;532(7598):245-9. doi: 10.1038/nature17403…
TNFRSF1B	necroptosis	Borghi A, Verstrepen L, Beyaert R. TRAF2 multitasking in TNF receptor-induced signaling to NF-κB, MAP kinases and cell death. Biochem Pharmacol. 2016 Sep 15;116:1-10. doi: 10.1016/j.bcp.2016.03.009. Epub 2016 Mar 16. PMID: 26993379.
TRAF2	necroptosis	Li J, Zhang J, Zhang Y, Wang Z, Song Y, Wei S, He M, You S, Jia J, Cheng J. TRAF2 protects against cerebral ischemia-induced brain injury by suppressing necroptosis. Cell Death Dis. 2019 Apr 15;10(5):328. doi: 10.1038/s41419-019-1558-5. PMID: 30988281.
PANX1	necroptosis	Douanne T, André-Grégoire G, Trillet K, Thys A, Papin A, Feyeux M, Hulin P, Chiron D, Gavard J, Bidère N. Pannexin-1 limits the production of proinflammatory cytokines during necroptosis. EMBO Rep. 2019 Oct 4;20(10):e47840. doi: 10.15252/embr.201947840. Epub 2019 Aug 14. PMID: 31410978.
OTULIN	necroptosis	Schünke H, Göbel U, Dikic I, Pasparakis M. OTULIN inhibits RIPK1-mediated keratinocyte necroptosis to prevent skin inflammation in mice. Nat Commun. 2021 Oct 8;12(1):5912. doi: 10.1038/s41467-021-25945-1. PMID: 34625557.
CYLD	necroptosis	Schworer SA, Smirnova II, Kurbatova I, Bagina U, Churova M, Fowler T, Roy AL, Degterev A, Poltorak A. Toll-like receptor-mediated down-regulation of the deubiquitinase cylindromatosis (CYLD) protects macrophages from necroptosis in wild-derived mice. J Biol Chem. 2014 May 16;289(20):14422-33. doi: 10.1074/jbc.M114.547547. Epub 2014 Apr 4. PMID: 24706750.
USP22	necroptosis	Roedig J, Kowald L, Juretschke T, Karlowitz R, Ahangarian Abhari B, Roedig H, Fulda S, Beli P, van Wijk SJ. USP22 controls necroptosis by regulating receptor-interacting protein kinase 3 ubiquitination. EMBO Rep. 2021 Feb 3;22(2):e50163. doi: 10.15252/embr.202050163. Epub 2020 Dec 28. PMID: 33369872.
MAP3K7	necroptosis	Li L, Chen Y, Doan J, Murray J, Molkentin JD, Liu Q. Transforming growth factor β-activated kinase 1 signaling pathway critically regulates myocardial survival and remodeling. Circulation. 2014 Dec 9;130(24):2162-72. doi: 10.1161/CIRCULATIONAHA.114.011195. Epub 2014 Oct 2. PMID: 25278099.
SQSTM1	necroptosis	Goodall ML, Fitzwalter BE, Zahedi S, Wu M, Rodriguez D, Mulcahy-Levy JM, Green DR, Morgan M, Cramer SD, Thorburn A. The Autophagy Machinery Controls Cell Death Switching between Apoptosis and Necroptosis. Dev Cell. 2016 May 23;37(4):337-349. doi: 10.1016/j.devcel.2016.04.018. PMID: 27219062.
STAT3	necroptosis	Smith AD, Lu C, Payne D, Paschall AV, Klement JD, Redd PS, Ibrahim ML, Yang D, Han Q, Liu Z, Shi H, Hartney TJ, Nayak-Kapoor A, Liu K. Autocrine IL6-Mediated Activation of the STAT3-DNMT Axis Silences the TNFα-RIP1 Necroptosis Pathway to Sustain Survival and Accumulation of Myeloid-Derived Suppressor Cells. Cancer Res. 2020 Aug 1;80(15):3145-3156. doi: 10.1158/0008-5472.CAN-19-3670. Epub 2020 Jun…
DIABLO	necroptosis	Campbell GR, To RK, Zhang G, Spector SA. SMAC mimetics induce autophagy-dependent apoptosis of HIV-1-infected macrophages. Cell Death Dis. 2020 Jul 27;11(7):590. doi: 10.1038/s41419-020-02761-x. PMID: 32719312.
DNMT1	necroptosis	Smith AD, Lu C, Payne D, Paschall AV, Klement JD, Redd PS, Ibrahim ML, Yang D, Han Q, Liu Z, Shi H, Hartney TJ, Nayak-Kapoor A, Liu K. Autocrine IL6-Mediated Activation of the STAT3-DNMT Axis Silences the TNFα-RIP1 Necroptosis Pathway to Sustain Survival and Accumulation of Myeloid-Derived Suppressor Cells. Cancer Res. 2020 Aug 1;80(15):3145-3156. doi: 10.1158/0008-5472.CAN-19-3670. Epub 2020 Jun…
CFLAR	necroptosis	He MX, He YW. CFLAR/c-FLIPL: a star in the autophagy, apoptosis and necroptosis alliance. Autophagy. 2013 May;9(5):791-3. doi: 10.4161/auto.23785. Epub 2013 Feb 7. PMID: 23392074.
BRAF	necroptosis	Najafov A, Zervantonakis IK, Mookhtiar AK, Greninger P, March RJ, Egan RK, Luu HS, Stover DG, Matulonis UA, Benes CH, Yuan J. BRAF and AXL oncogenes drive RIPK3 expression loss in cancer. PLoS Biol. 2018 Aug 29;16(8):e2005756. doi: 10.1371/journal.pbio.2005756. PMID: 30157175
AXL	necroptosis	Najafov A, Zervantonakis IK, Mookhtiar AK, Greninger P, March RJ, Egan RK, Luu HS, Stover DG, Matulonis UA, Benes CH, Yuan J. BRAF and AXL oncogenes drive RIPK3 expression loss in cancer. PLoS Biol. 2018 Aug 29;16(8):e2005756. doi: 10.1371/journal.pbio.2005756. PMID: 30157175.
ID1	necroptosis	Tan HY, Wang N, Chan YT, Zhang C, Guo W, Chen F, Zhong Z, Li S, Feng Y. ID1 overexpression increases gefitinib sensitivity in non-small cell lung cancer by activating RIP3/MLKL-dependent necroptosis. Cancer Lett. 2020 Apr 10;475:109-118. doi: 10.1016/j.canlet.2020.01.025. Epub 2020 Jan 28. PMID: 32004572.
CDKN2A	necroptosis	Medrano RFV, Hunger A, Catani JPP, Strauss BE. Uncovering the immunotherapeutic cycle initiated by p19Arf and interferon-β gene transfer to cancer cells: An inducer of immunogenic cell death. Oncoimmunology. 2017 May 19;6(7):e1329072. doi: 10.1080/2162402X.2017.1329072. PMID: 28811972.
HSPA4	necroptosis	Johnston AN, Ma Y, Liu H, Liu S, Hanna-Addams S, Chen S, Chen C, Wang Z. Necroptosis-blocking compound NBC1 targets heat shock protein 70 to inhibit MLKL polymerization and necroptosis. Proc Natl Acad Sci U S A. 2020 Mar 24;117(12):6521-6530. doi: 10.1073/pnas.1916503117. Epub 2020 Mar 10. PMID: 32156734; PMCID: PMC7104336.
BCL2	necroptosis	Lee KM, Lee H, Han D, Moon WK, Kim K, Oh HJ, Choi J, Hwang EH, Kang SE, Im SA, Lee KH, Ryu HS. Combined the SMAC mimetic and BCL2 inhibitor sensitizes neoadjuvant chemotherapy by targeting necrosome complexes in tyrosine aminoacyl-tRNA synthase-positive breast cancer. Breast Cancer Res. 2020 Nov 25;22(1):130. doi: 10.1186/s13058-020-01367-7. PMID: 33239070.
STUB1	necroptosis	Seo J, Lee EW, Sung H, Seong D, Dondelinger Y, Shin J, Jeong M, Lee HK, Kim JH, Han SY, Lee C, Seong JK, Vandenabeele P, Song J. CHIP controls necroptosis through ubiquitylation- and lysosome-dependent degradation of RIPK3. Nat Cell Biol. 2016 Mar;18(3):291-302. doi: 10.1038/ncb3314. Epub 2016 Feb 22. PMID: 26900751.
FLT3	necroptosis	Hillert LK, Bettermann-Bethge K, Nimmagadda SC, Fischer T, Naumann M, Lavrik IN. Targeting RIPK1 in AML cells carrying FLT3-ITD. Int J Cancer. 2019 Sep 15;145(6):1558-1569. doi: 10.1002/ijc.32246. Epub 2019 Mar 23. PMID: 30828789.
HAT1	necroptosis	Carafa V, Nebbioso A, Cuomo F, Rotili D, Cobellis G, Bontempo P, Baldi A, Spugnini EP, Citro G, Chambery A, Russo R, Ruvo M, Ciana P, Maravigna L, Shaik J, Radaelli E, De Antonellis P, Tarantino D, Pirolli A, Ragno R, Zollo M, Stunnenberg HG, Mai A, Altucci L. RIP1-HAT1-SIRT Complex Identification and Targeting in Treatment and Prevention of Cancer. Clin Cancer Res. 2018 Jun 15;24(12):2886-2900. …
SIRT2	necroptosis	Hannan NJ, Beard S, Binder NK, Onda K, Kaitu'u-Lino TJ, Chen Q, Tuohey L, De Silva M, Tong S. Key players of the necroptosis pathway RIPK1 and SIRT2 are altered in placenta from preeclampsia and fetal growth restriction. Placenta. 2017 Mar;51:1-9. doi: 10.1016/j.placenta.2017.01.002. Epub 2017 Jan 4. PMID: 28292463.
SIRT1	necroptosis	Nikseresht S, Khodagholi F, Ahmadiani A. Protective effects of ex-527 on cerebral ischemia-reperfusion injury through necroptosis signaling pathway attenuation. J Cell Physiol. 2019 Feb;234(2):1816-1826. doi: 10.1002/jcp.27055. Epub 2018 Aug 1. PMID: 30067864.
PLK1	necroptosis	Deeraksa A, Pan J, Sha Y, Liu XD, Eissa NT, Lin SH, Yu-Lee LY. Plk1 is upregulated in androgen-insensitive prostate cancer cells and its inhibition leads to necroptosis. Oncogene. 2013 Jun 13;32(24):2973-83. doi: 10.1038/onc.2012.309. Epub 2012 Aug 13. PMID: 22890325.
MPG	necroptosis	Allocca M, Corrigan JJ, Mazumder A, Fake KR, Samson LD. Inflammation, necrosis, and the kinase RIP3 are key mediators of AAG-dependent alkylation-induced retinal degeneration. Sci Signal. 2019 Feb 12;12(568):eaau9216. doi: 10.1126/scisignal.aau9216. PMID: 30755477.
BACH2	necroptosis	Petanidis S, Domvri K, Porpodis K, Anestakis D, Freitag L, Hohenforst-Schmidt W, Tsavlis D, Zarogoulidis K. Inhibition of kras-derived exosomes downregulates immunosuppressive BACH2/GATA-3 expression via RIP-3 dependent necroptosis and miR-146/miR-210 modulation. Biomed Pharmacother. 2020 Feb;122:109461. doi: 10.1016/j.biopha.2019.109461. Epub 2019 Dec 30. PMID: 31918262.
GATA3	necroptosis	Petanidis S, Domvri K, Porpodis K, Anestakis D, Freitag L, Hohenforst-Schmidt W, Tsavlis D, Zarogoulidis K. Inhibition of kras-derived exosomes downregulates immunosuppressive BACH2/GATA-3 expression via RIP-3 dependent necroptosis and miR-146/miR-210 modulation. Biomed Pharmacother. 2020 Feb;122:109461. doi: 10.1016/j.biopha.2019.109461. Epub 2019 Dec 30. PMID: 31918262.
MYCN	necroptosis	Dong Y, Gong W, Hua Z, Chen B, Zhao G, Liu Z, Thiele CJ, Li Z. Combination of Rapamycin and MK-2206 Induced Cell Death via Autophagy and Necroptosis in MYCN-Amplified Neuroblastoma Cell Lines. Front Pharmacol. 2020 Feb 14;11:31. doi: 10.3389/fphar.2020.00031. PMID: 32116708.
ALK	necroptosis	Nicolai S, Pieraccioli M, Peschiaroli A, Melino G, Raschellà G. Neuroblastoma: oncogenic mechanisms and therapeutic exploitation of necroptosis. Cell Death Dis. 2015 Dec 3;6(12):e2010. doi: 10.1038/cddis.2015.354. PMID: 26633716.
ATRX	necroptosis	Nicolai S, Pieraccioli M, Peschiaroli A, Melino G, Raschellà G. Neuroblastoma: oncogenic mechanisms and therapeutic exploitation of necroptosis. Cell Death Dis. 2015 Dec 3;6(12):e2010. doi: 10.1038/cddis.2015.354. PMID: 26633716.
TERT	necroptosis	Nicolai S, Pieraccioli M, Peschiaroli A, Melino G, Raschellà G. Neuroblastoma: oncogenic mechanisms and therapeutic exploitation of necroptosis. Cell Death Dis. 2015 Dec 3;6(12):e2010. doi: 10.1038/cddis.2015.354. PMID: 26633716.
SLC39A7	necroptosis	Fauster A, Rebsamen M, Willmann KL, César-Razquin A, Girardi E, Bigenzahn JW, Schischlik F, Scorzoni S, Bruckner M, Konecka J, Hörmann K, Heinz LX, Boztug K, Superti-Furga G. Systematic genetic mapping of necroptosis identifies SLC39A7 as modulator of death receptor trafficking. Cell Death Differ. 2019 Jun;26(6):1138-1155. doi: 10.1038/s41418-018-0192-6. Epub 2018 Sep 20. PMID: 30237509.
SPATA2	necroptosis	Feltham R, Webb AI, Silke J. SPATA2 - Keeping the TNF signal short and sweet. EMBO J. 2016 Sep 1;35(17):1848-50. doi: 10.15252/embj.201695061. Epub 2016 Jul 28. PMID: 27470000.
RNF31	necroptosis	Kupka S, De Miguel D, Draber P, Martino L, Surinova S, Rittinger K, Walczak H. SPATA2-Mediated Binding of CYLD to HOIP Enables CYLD Recruitment to Signaling Complexes. Cell Rep. 2016 Aug 30;16(9):2271-80. doi: 10.1016/j.celrep.2016.07.086. Epub 2016 Aug 18. PMID: 27545878.
IDH1	necroptosis	Yang Z, Jiang B, Wang Y, Ni H, Zhang J, Xia J, Shi M, Hung LM, Ruan J, Mak TW, Li Q, Han J. 2-HG Inhibits Necroptosis by Stimulating DNMT1-Dependent Hypermethylation of the RIP3 Promoter. Cell Rep. 2017 May 30;19(9):1846-1857. doi: 10.1016/j.celrep.2017.05.012. PMID: 28564603.
IDH2	necroptosis	Yang Z, Jiang B, Wang Y, Ni H, Zhang J, Xia J, Shi M, Hung LM, Ruan J, Mak TW, Li Q, Han J. 2-HG Inhibits Necroptosis by Stimulating DNMT1-Dependent Hypermethylation of the RIP3 Promoter. Cell Rep. 2017 May 30;19(9):1846-1857. doi: 10.1016/j.celrep.2017.05.012. PMID: 28564603.
KLF9	necroptosis	Tung B, Ma D, Wang S, Oyinlade O, Laterra J, Ying M, Lv SQ, Wei S, Xia S. Krüppel-like factor 9 and histone deacetylase inhibitors synergistically induce cell death in glioblastoma stem-like cells. BMC Cancer. 2018 Oct 22;18(1):1025. doi: 10.1186/s12885-018-4874-8. PMID: 30348136.
HDAC9	necroptosis	Tung B, Ma D, Wang S, Oyinlade O, Laterra J, Ying M, Lv SQ, Wei S, Xia S. Krüppel-like factor 9 and histone deacetylase inhibitors synergistically induce cell death in glioblastoma stem-like cells. BMC Cancer. 2018 Oct 22;18(1):1025. doi: 10.1186/s12885-018-4874-8. PMID: 30348136.
HSP90AA1	necroptosis	Yan C, Oh JS, Yoo SH, Lee JS, Yoon YG, Oh YJ, Jang MS, Lee SY, Yang J, Lee SH, Kim HY, Yoo YH. The targeted inhibition of mitochondrial Hsp90 overcomes the apoptosis resistance conferred by Bcl-2 in Hep3B cells via necroptosis. Toxicol Appl Pharmacol. 2013 Jan 1;266(1):9-18. doi: 10.1016/j.taap.2012.11.001. Epub 2012 Nov 9. PMID: 23147571.
LEF1	necroptosis	Liu P, Xu B, Shen W, Zhu H, Wu W, Fu Y, Chen H, Dong H, Zhu Y, Miao K, Xu W, Li J. Dysregulation of TNFα-induced necroptotic signaling in chronic lymphocytic leukemia: suppression of CYLD gene by LEF1. Leukemia. 2012 Jun;26(6):1293-300. doi: 10.1038/leu.2011.357. Epub 2011 Dec 13. PMID: 22157808.
BNIP3	necroptosis	Kim JY, Kim YJ, Lee S, Park JH. BNip3 is a mediator of TNF-induced necrotic cell death. Apoptosis. 2011 Feb;16(2):114-26. doi: 10.1007/s10495-010-0550-4. PMID: 20963496.
CD40	necroptosis	Qiu X, Klausen C, Cheng JC, Leung PC. CD40 ligand induces RIP1-dependent, necroptosis-like cell death in low-grade serous but not serous borderline ovarian tumor cells. Cell Death Dis. 2015 Aug 27;6(8):e1864. doi: 10.1038/cddis.2015.229. PMID: 26313915.
BCL2L11	necroptosis	Locatelli SL, Cleris L, Stirparo GG, Tartari S, Saba E, Pierdominici M, Malorni W, Carbone A, Anichini A, Carlo-Stella C. BIM upregulation and ROS-dependent necroptosis mediate the antitumor effects of the HDACi Givinostat and Sorafenib in Hodgkin lymphoma cell line xenografts. Leukemia. 2014 Sep;28(9):1861-71. doi: 10.1038/leu.2014.81. Epub 2014 Feb 24. PMID: 24561519.
EGFR	necroptosis	Zhao Q, Kretschmer N, Bauer R, Efferth T. Shikonin and its derivatives inhibit the epidermal growth factor receptor signaling and synergistically kill glioblastoma cells in combination with erlotinib. Int J Cancer. 2015 Sep 15;137(6):1446-56. doi: 10.1002/ijc.29483. Epub 2015 Mar 6. PMID: 25688715.
DDX58	necroptosis	Dunker W, Ye X, Zhao Y, Liu L, Richardson A, Karijolich J. TDP-43 prevents endogenous RNAs from triggering a lethal RIG-I-dependent interferon response. Cell Rep. 2021 Apr 13;35(2):108976. doi: 10.1016/j.celrep.2021.108976. PMID: 33852834.
TARDBP	necroptosis	Dunker W, Ye X, Zhao Y, Liu L, Richardson A, Karijolich J. TDP-43 prevents endogenous RNAs from triggering a lethal RIG-I-dependent interferon response. Cell Rep. 2021 Apr 13;35(2):108976. doi: 10.1016/j.celrep.2021.108976. PMID: 33852834.
APP	necroptosis	Leong YQ, Ng KY, Chye SM, Ling APK, Koh RY. Mechanisms of action of amyloid-beta and its precursor protein in neuronal cell death. Metab Brain Dis. 2020 Jan;35(1):11-30. doi: 10.1007/s11011-019-00516-y. Epub 2019 Dec 6. PMID: 31811496.
TNFRSF21	necroptosis	Wang L, Shen Q, Liao H, Fu H, Wang Q, Yu J, Zhang W, Chen C, Dong Y, Yang X, Guo Q, Zhang J, Zhang J, Zhang W, Lin H, Duan Y. Multi-Arm PEG/Peptidomimetic Conjugate Inhibitors of DR6/APP Interaction Block Hematogenous Tumor Cell Extravasation. Adv Sci (Weinh). 2021 Jun;8(11):e2003558. doi: 10.1002/advs.202003558. Epub 2021 Mar 18. PMID: 34105277; PMCID: PMC8188212.

## Sheet: Supplementary Table 4
Supplementary Table 4: The primer sequences for qRT-PCR.
Gene	GenBank Accession	Sequence (5' -> 3')	Amplicon Size
SCYL2	NM_017988	Forward-TAACTCGGCTTCGACACCCT	98bp
		Reverse-ACTGGCAAAAACTGGTTCTGT
PTDSS1	NM_014754	Forward-GCAAGTGGAGGACATCACCAT	105bp
		Reverse-TCATCCCTGGTAAAGGCGAAG
SEMA4G	NM_001203244	Forward-CTAGATGCCACCCCTCGGAT	93bp
		Reverse-CAGCAGTGTTGAGTAGTTCTGG
NRG3	NM_001165972	Forward-ACGACGACATATTCCACAGAGC	110bp
		Reverse-CCGGTCAGGGTTTCGATCAC
IDI1	NM_004508	Forward-AACACTAACCACCTCGACAAGC	157bp
		Reverse-AGACACTAAAAGCTCGATGCAA
H2AX	NM_002105	Forward-CAACAAGAAGACGCGAATCA	223bp
		Reverse-CGGGCCCTCTTAGTACTCCT
PHF11	NM_001040443	Forward-AGATGCAACTGTGAAAGTTCCTT	248bp
		Reverse-GCTGCCACCTTTGTTGAGATG
ARHGAP12	NM_018287	Forward-AAACTCCAAAGCGTTTTATGTGC	90bp
		Reverse-AGACCAGCTACCTGCTTAACA
FAM171A1	NM_001010924	Forward-GCAGATGCGCTCATCGAGAT	102bp
		Reverse-GCCCAGCTTATACTGGAACTTG
PPM1M	NM_144641	Forward-CTTGGTGCGGAGAGATGAGAT	98bp
		Reverse-GCTCAGGATAGACAAAGGCCAG
CALN1	NM_031468	Forward-GTACAAGGGGAATTACCTCAACC	77bp
		Reverse-CCTCCACGGAGATATTAGCCAG
GAPDH	NM_001256799	Forward-ACAACTTTGGTATCGTGGAAGG	101bp
		Reverse-GCCATCACGCCACAGTTTC

## Sheet: Supplementary Table 5
Supplementary Table 5: The expression of 67 NRGs in patients with or without gliomas
gene	NormalMean	TumorMean	Fold Change	pValue	FDR
FADD	7.58793	8.15032	1.47672	2.66e-75	0
FAS	7.26247	7.98866	1.65427	1.52e-21	0
FASLG	1.04776	1.53092	1.3978	1.74e-20	0
MLKL	7.0859	7.30682	1.16548	4.66e-05	5e-05
RIPK1	9.20676	9.86966	1.58326	1.55e-86	0
RIPK3	4.86941	5.83975	1.9593	4.59e-82	0
TLR3	5.89527	7.33514	2.71297	6.24e-126	0
TNF	3.69207	2.87806	-1.7581	3.99e-20	0
TSC1	11.4298	11.0346	-1.31514	3.63e-25	0
TRIM11	9.93271	9.7254	-1.15453	1.05e-06	0
CASP8	6.51851	7.05797	1.45343	9.36e-34	0
ZBP1	2.92005	3.94605	2.03637	1.04e-45	0
MAPK8	10.5325	9.98037	-1.46622	1.44e-42	0
IPMK	8.23747	8.40216	1.12093	2.67e-09	0
ITPK1	13.2232	12.5619	-1.58146	5.28e-59	0
SIRT3	10.3814	10.1642	-1.1625	1.33e-13	0
MYC	7.20581	9.5459	5.06334	8.6e-207	0
TNFRSF1A	9.93337	10.6688	1.66493	5.81e-29	0
TNFSF10	7.6718	7.55987	-1.08067	0.00745262	0.00819
TNFRSF1B	9.02952	9.78432	1.68739	4.02e-32	0
TRAF2	8.89121	8.9589	1.04803	0.397603	0.3976
PANX1	8.28108	8.20431	-1.05466	0.0123832	0.01338
OTULIN	8.50894	9.05082	1.45587	1.6e-70	0
CYLD	11.3394	10.4905	-1.80115	1.26e-158	0
USP22	13.3818	12.9604	-1.33928	3.33e-42	0
MAP3K7	10.417	10.5515	1.09767	7.16e-12	0
SQSTM1	12.6951	12.8645	1.12459	0.0669883	0.07013
STAT3	11.5159	12.3911	1.83421	8.14e-107	0
DIABLO	9.37724	10.0269	1.56881	3.23e-118	0
DNMT1	10.5438	11.1891	1.56416	2.02e-64	0
CFLAR	11.1881	11.3144	1.09148	0.106463	0.10808
BRAF	10.652	9.84347	-1.75139	1.66e-137	0
AXL	10.228	10.435	1.1543	0.000556419	0.00062
ID1	9.38956	10.9101	2.86891	5.91e-112	0
CDKN2A	5.21805	7.25287	4.09771	6.14e-130	0
HSPA4	11.7253	11.4703	-1.19336	1.82e-21	0
BCL2	9.62239	9.72498	1.0737	0.076039	0.07838
STUB1	11.5774	11.148	-1.34673	2.4e-58	0
FLT3	5.61043	4.1697	-2.71458	3.02e-30	0
HAT1	9.12608	10.1252	1.99877	6.04e-189	0
SIRT2	12.5063	12.7963	1.22258	3.07e-09	0
SIRT1	9.34056	9.6443	1.23434	2e-19	0
PLK1	7.19974	8.96569	3.40098	2.05e-173	0
MPG	9.43669	9.72736	1.22321	4.53e-10	0
BACH2	8.02503	8.22959	1.15234	1.61e-15	0
GATA3	2.20116	3.97231	3.41325	4.94e-95	0
MYCN	7.02399	7.80538	1.71878	1.52e-41	0
ALK	6.98766	6.38451	-1.51903	9.01e-25	0
ATRX	11.3236	10.8149	-1.42281	5.84e-52	0
TERT	1.69095	3.68653	3.98775	2.58e-63	0
SLC39A7	10.8319	11.4711	1.55748	2.3e-108	0
SPATA2	10.7198	9.9064	-1.75734	3.7e-144	0
RNF31	9.74375	9.58671	-1.11499	4.27e-07	0
IDH1	9.55707	11.403	3.59489	1.87e-259	0
IDH2	11.4495	11.9445	1.4093	1.56e-25	0
KLF9	11.2871	11.3453	1.04117	0.0278678	0.02964
HDAC9	9.49893	9.0993	-1.31916	2.39e-28	0
HSP90AA1	15.429	14.8172	-1.52816	3.21e-64	0
LEF1	7.98622	9.23651	2.37889	1.48e-116	0
BNIP3	11.8877	11.2739	-1.53025	1.04e-110	0
CD40	7.21428	7.74407	1.44372	8.78e-28	0
BCL2L11	7.79889	8.8537	2.07746	1.93e-146	0
EGFR	10.032	13.6473	12.2554	3.32e-257	0
DDX58	8.26705	8.75149	1.39904	1.11e-49	0
TARDBP	11.9026	12.2989	1.31614	2.41e-38	0
APP	15.539	14.5815	-1.942	1.02e-122	0
TNFRSF21	10.7334	11.7026	1.95773	9.89e-88	0

## Sheet: Supplementary Table 6
Supplementary Table 6: The prognostic values of 67 NRGs in patients with glioma
id	HR	HR.95L	HR.95H	pvalue	km
FADD	1.11458	1.08901	1.14075	5.12591e-20	0
FAS	1.03563	1.02632	1.04502	2.97932e-14	0
FASLG	17.6934	8.01779	39.0453	1.12302e-12	0
MLKL	1.18714	1.1313	1.24575	2.99785e-12	0
RIPK1	1.16342	1.13267	1.19502	1.69558e-28	0
RIPK3	1.27264	1.19052	1.36043	1.40067e-12	5.28111e-12
TLR3	1.12391	1.08593	1.16322	2.74057e-11	2.33147e-15
TNF	0.928562	0.878013	0.98202	0.00945187	0.000982697
TSC1	0.881688	0.850514	0.914006	7.09806e-12	2.22045e-16
TRIM11	0.962434	0.924641	1.00177	0.0610196	0.000102429
CASP8	1.22302	1.18675	1.26041	3.0711e-39	0
ZBP1	1.03445	1.0162	1.05304	0.000192334	0
MAPK8	0.947582	0.931306	0.964143	1.12265e-09	1.33227e-15
IPMK	0.656747	0.5822	0.740839	7.93691e-12	0
ITPK1	0.98814	0.985012	0.991278	1.62753e-13	0
SIRT3	0.980443	0.963685	0.997492	0.0247381	0.000105832
MYC	0.99023	0.98396	0.99654	0.00245043	3.89461e-11
TNFRSF1A	1.00468	1.00364	1.00572	1.18004e-18	0
TNFSF10	1.02977	1.01915	1.0405	2.89811e-08	1.14626e-08
TNFRSF1B	1.0204	1.01093	1.02995	2.16304e-05	0.000107497
TRAF2	1.08353	1.04478	1.12372	1.57899e-05	3.20858e-07
PANX1	1.00702	0.98156	1.03314	0.592403	0.0229008
OTULIN	1.30088	1.22427	1.38229	2.00163e-17	0
CYLD	1.01565	0.990852	1.04106	0.218261	0.00105359
USP22	0.996301	0.99152	1.00111	0.131105	2.90283e-05
MAP3K7	1.00758	0.974853	1.04141	0.653965	0.00102416
SQSTM1	1.00415	1.00302	1.00529	7.28372e-13	7.63451e-10
STAT3	1.01862	1.01324	1.02403	8.75477e-12	3.9968e-15
DIABLO	1.00368	0.997598	1.0098	0.236149	0.0754337
DNMT1	1.01847	1.013	1.02398	2.84953e-11	0
CFLAR	1.07662	1.06166	1.09179	4.60863e-25	0
BRAF	0.962022	0.923622	1.00202	0.0624788	0.00660305
AXL	1.01747	1.00573	1.02936	0.00346129	6.42809e-05
ID1	0.998496	0.996596	1.0004	0.121245	0.000194009
CDKN2A	1.00443	1.00257	1.00629	2.82293e-06	2.22045e-16
HSPA4	1.041	1.03252	1.04955	6.03709e-22	0
BCL2	0.943078	0.89825	0.990143	0.0183418	0.000184692
STUB1	0.992411	0.988576	0.99626	0.000114633	1.33791e-05
FLT3	0.362902	0.182143	0.723043	0.00395165	9.64961e-12
HAT1	1.04109	1.03341	1.04882	1.5171e-26	0
SIRT2	0.997165	0.995503	0.99883	0.000853222	5.29088e-12
SIRT1	0.85139	0.81877	0.885308	6.93173e-16	0
PLK1	1.03877	1.03124	1.04636	1.32968e-24	0
MPG	1.01235	1.00459	1.02016	0.00176033	0.00128779
BACH2	0.965869	0.840229	1.1103	0.62525	1.04067e-07
GATA3	1.43603	1.29521	1.59215	6.31398e-12	1.05693e-13
MYCN	0.967102	0.946741	0.987902	0.0020623	1.17018e-13
ALK	1.0103	0.976103	1.04569	0.559799	0.0668887
ATRX	1.00017	0.987888	1.01261	0.978355	0.201299
TERT	1.17738	1.09375	1.2674	1.40045e-05	1.91379e-10
SLC39A7	1.01191	1.00739	1.01645	2.17055e-07	2.00939e-12
SPATA2	0.958984	0.929166	0.989758	0.00935653	1.26455e-06
RNF31	1.00388	0.989409	1.01857	0.600961	0.086355
IDH1	1.0172	1.01335	1.02106	1.10543e-18	7.77156e-16
IDH2	1.00351	1.00071	1.00632	0.0141183	0.000221505
KLF9	0.992422	0.983207	1.00172	0.109983	0.0256638
HDAC9	1.00767	0.990538	1.0251	0.382503	0.00774405
HSP90AA1	1.00033	0.999519	1.00115	0.42144	0.11447
LEF1	1.03075	1.02393	1.03762	3.92675e-19	0
BNIP3	0.993517	0.98633	1.00076	0.079116	1.49799e-08
CD40	1.12017	1.0919	1.14917	3.26794e-18	4.10783e-14
BCL2L11	0.949773	0.910959	0.99024	0.0154914	0.00276658
EGFR	1.00099	1.00074	1.00125	2.61321e-14	0
DDX58	1.05469	1.036	1.07372	5.29616e-09	9.30078e-12
TARDBP	1.00963	1.00541	1.01388	7.51049e-06	9.41979e-10
APP	0.999984	0.999449	1.00052	0.954486	0.0320196
TNFRSF21	0.988617	0.984146	0.993109	7.4246e-07	3.97015e-07

## Sheet: Supplementary Table 7
Supplementary Table 7: Spearman correlation analysis of the 67 necroptosis-related genes.
From	To	Cor	P-value	Color	Weight
FADD	FAS	0.447153	1.9656e-91	pink	1.34146
FADD	FASLG	0.235487	1.1188e-24	pink	0.706461
FADD	RIPK1	0.734475	8.7408319653134e-313	pink	2.20342
FADD	RIPK3	0.49988	2.75496e-117	pink	1.49964
FADD	TLR3	0.59368	3.05745e-176	pink	1.78104
FADD	TNF	0.184057	1.57573e-15	pink	0.552171
FADD	CASP8	0.66908	5.64412e-240	pink	2.00724
FADD	ZBP1	0.188395	3.29191e-16	pink	0.565185
FADD	MAPK8	0.318447	8.87973e-45	pink	0.955341
FADD	IPMK	0.423929	2.06977e-81	pink	1.27179
FADD	SIRT3	0.241609	6.27769e-26	pink	0.724826
FADD	MYC	0.587103	1.83548e-171	pink	1.76131
FADD	TNFRSF1A	0.757361	0	pink	2.27208
FADD	TNFSF10	0.28912	7.11113e-37	pink	0.867361
FADD	TNFRSF1B	0.534831	4.21726e-137	pink	1.60449
FADD	TRAF2	0.267661	1.18023e-31	pink	0.802982
FADD	PANX1	0.705715	2.76514e-278	pink	2.11715
FADD	OTULIN	0.692237	1.6023e-263	pink	2.07671
FADD	CYLD	0.276872	7.72817e-34	pink	0.830617
FADD	USP22	0.386984	5.23481e-67	pink	1.16095
FADD	MAP3K7	0.465069	1.0288e-99	pink	1.39521
FADD	SQSTM1	0.707612	1.97893e-280	pink	2.12284
FADD	STAT3	0.804946	0	pink	2.41484
FADD	DIABLO	0.771258	0	pink	2.31377
FADD	DNMT1	0.415463	6.00607e-78	pink	1.24639
FADD	CFLAR	0.183308	2.05689e-15	pink	0.549924
FADD	BRAF	0.183306	2.0584e-15	pink	0.549918
FADD	AXL	0.542207	1.37619e-141	pink	1.62662
FADD	ID1	0.456632	9.4112e-96	pink	1.3699
FADD	CDKN2A	0.400634	4.06007e-72	pink	1.2019
FADD	HSPA4	0.657102	1.29854e-228	pink	1.9713
FADD	BCL2	0.320068	3.05285e-45	pink	0.960204
FADD	STUB1	0.361542	4.14888e-58	pink	1.08463
FADD	HAT1	0.842283	0	pink	2.52685
FADD	SIRT2	0.315726	5.25214e-44	pink	0.947177
FADD	SIRT1	0.322918	4.5962e-46	pink	0.968755
FADD	PLK1	0.598367	1.02853e-179	pink	1.7951
FADD	MPG	0.686544	1.58087e-257	pink	2.05963
FADD	BACH2	0.381925	3.56681e-65	pink	1.14578
FADD	GATA3	0.252338	3.30446e-28	pink	0.757015
FADD	MYCN	0.38842	1.55741e-67	pink	1.16526
FADD	ALK	0.328816	8.56209e-48	pink	0.986449
FADD	ATRX	0.35377	1.51316e-55	pink	1.06131
FADD	TERT	0.136193	4.22872e-09	pink	0.40858
FADD	SLC39A7	0.861743	0	pink	2.58523
FADD	SPATA2	0.169193	2.53022e-13	pink	0.50758
FADD	RNF31	0.359598	1.84312e-57	pink	1.07879
FADD	IDH1	0.803047	0	pink	2.40914
FADD	IDH2	0.6495	1.13999e-221	pink	1.9485
FADD	KLF9	0.280307	1.12749e-34	pink	0.84092
FADD	HDAC9	0.455234	4.16627e-95	pink	1.3657
FADD	LEF1	0.481316	1.15722e-107	pink	1.44395
FADD	BNIP3	0.235052	1.36883e-24	pink	0.705156
FADD	CD40	0.236127	8.31138e-25	pink	0.70838
FADD	BCL2L11	0.480176	4.31546e-107	pink	1.44053
FADD	EGFR	0.3919	8.05744e-69	pink	1.1757
FADD	DDX58	0.446171	5.41443e-91	pink	1.33851
FADD	TARDBP	0.600009	6.0435e-181	pink	1.80003
FADD	APP	0.546743	2.10761e-144	pink	1.64023
FADD	TNFRSF21	0.506631	6.1737e-121	pink	1.51989
FAS	FASLG	0.418422	3.79894e-79	pink	1.25526
FAS	MLKL	0.372727	6.36508e-62	pink	1.11818
FAS	RIPK1	0.392638	4.2778e-69	pink	1.17791
FAS	RIPK3	0.49917	6.59242e-117	pink	1.49751
FAS	TLR3	0.462375	1.94656e-98	pink	1.38713
FAS	TNF	0.11268	1.21308e-06	pink	0.33804
FAS	TSC1	-0.151327	6.36e-11	#6495ED	0.45398
FAS	TRIM11	-0.17178	1.07894e-13	#6495ED	0.515341
FAS	CASP8	0.600703	1.81775e-181	pink	1.80211
FAS	ZBP1	0.367656	3.56267e-60	pink	1.10297
FAS	MYC	0.189777	1.98338e-16	pink	0.56933
FAS	TNFRSF1A	0.577399	1.30925e-164	pink	1.7322
FAS	TNFSF10	0.498054	2.5889e-116	pink	1.49416
FAS	TNFRSF1B	0.522816	5.00551e-130	pink	1.56845
FAS	PANX1	0.33561	7.79926e-50	pink	1.00683
FAS	OTULIN	0.434244	9.13276e-86	pink	1.30273
FAS	CYLD	0.338883	7.77013e-51	pink	1.01665
FAS	MAP3K7	0.126054	5.5128e-08	pink	0.378161
FAS	SQSTM1	0.425431	4.90875e-82	pink	1.27629
FAS	STAT3	0.534234	9.62597e-137	pink	1.6027
FAS	DIABLO	0.292769	8.27673e-38	pink	0.878306
FAS	CFLAR	0.299765	1.22449e-39	pink	0.899296
FAS	AXL	0.457104	5.69292e-96	pink	1.37131
FAS	ID1	0.144676	4.24626e-10	pink	0.434028
FAS	CDKN2A	0.138889	2.06772e-09	pink	0.416667
FAS	HSPA4	0.393848	1.5111e-69	pink	1.18154
FAS	BCL2	0.228607	2.58645e-23	pink	0.685821
FAS	FLT3	-0.171141	1.33365e-13	#6495ED	0.513422
FAS	HAT1	0.429239	1.23781e-83	pink	1.28772
FAS	PLK1	0.185495	9.4179e-16	pink	0.556484
FAS	MPG	0.20412	8.18209e-19	pink	0.61236
FAS	GATA3	0.224538	1.58015e-22	pink	0.673613
FAS	ALK	0.230341	1.18317e-23	pink	0.691024
FAS	TERT	0.138133	2.53047e-09	pink	0.4144
FAS	SLC39A7	0.335557	8.09414e-50	pink	1.00667
FAS	IDH1	0.366836	6.78363e-60	pink	1.10051
FAS	IDH2	0.292675	8.7519e-38	pink	0.878024
FAS	HDAC9	0.137542	2.96133e-09	pink	0.412626
FAS	LEF1	0.406359	2.46884e-74	pink	1.21908
FAS	CD40	0.381423	5.40275e-65	pink	1.14427
FAS	BCL2L11	0.380111	1.59127e-64	pink	1.14033
FAS	EGFR	0.178909	9.61832e-15	pink	0.536727
FAS	DDX58	0.455728	2.46515e-95	pink	1.36718
FAS	TARDBP	0.167591	4.26093e-13	pink	0.502773
FAS	APP	0.212703	2.49917e-20	pink	0.638109
FAS	TNFRSF21	0.0951004	4.26728e-05	pink	0.285301
FASLG	MLKL	0.332649	6.13601e-49	pink	0.997946
FASLG	RIPK1	0.246485	5.96867e-27	pink	0.739455
FASLG	RIPK3	0.547744	4.97376e-145	pink	1.64323
FASLG	TLR3	0.393321	2.37776e-69	pink	1.17996
FASLG	TNF	0.141172	1.11581e-09	pink	0.423516
FASLG	TSC1	-0.102418	1.03837e-05	#6495ED	0.307255
FASLG	TRIM11	-0.0913593	8.46551e-05	#6495ED	0.274078
FASLG	CASP8	0.502221	1.52722e-118	pink	1.50666
FASLG	ZBP1	0.349797	2.89952e-54	pink	1.04939
FASLG	ITPK1	-0.120179	2.23339e-07	#6495ED	0.360537
FASLG	TNFRSF1A	0.340737	2.07857e-51	pink	1.02221
FASLG	TNFSF10	0.522331	9.52704e-130	pink	1.56699
FASLG	TNFRSF1B	0.468078	3.73545e-101	pink	1.40423
FASLG	PANX1	0.199784	4.49881e-18	pink	0.599351
FASLG	OTULIN	0.310555	1.46264e-42	pink	0.931664
FASLG	CYLD	0.344026	1.95873e-52	pink	1.03208
FASLG	SQSTM1	0.223848	2.13982e-22	pink	0.671544
FASLG	STAT3	0.313581	2.1042e-43	pink	0.940743
FASLG	DIABLO	0.101927	1.14512e-05	pink	0.305782
FASLG	CFLAR	0.2439	2.09133e-26	pink	0.7317
FASLG	AXL	0.299323	1.60371e-39	pink	0.897969
FASLG	ID1	0.0985257	2.22902e-05	pink	0.295577
FASLG	CDKN2A	0.135117	5.60514e-09	pink	0.405351
FASLG	HSPA4	0.251816	4.29069e-28	pink	0.755449
FASLG	BCL2	0.0948813	4.44507e-05	pink	0.284644
FASLG	STUB1	-0.0937392	5.49122e-05	#6495ED	0.281218
FASLG	HAT1	0.237235	4.95601e-25	pink	0.711706
FASLG	PLK1	0.106424	4.59564e-06	pink	0.319273
FASLG	MPG	0.0968461	3.07308e-05	pink	0.290538
FASLG	GATA3	0.281618	5.36847e-35	pink	0.844853
FASLG	SLC39A7	0.213991	1.46114e-20	pink	0.641973
FASLG	IDH1	0.216909	4.27558e-21	pink	0.650726
FASLG	IDH2	0.114734	7.71125e-07	pink	0.344201
FASLG	LEF1	0.342115	7.75209e-52	pink	1.02635
FASLG	CD40	0.370192	4.8017e-61	pink	1.11058
FASLG	BCL2L11	0.292286	1.10191e-37	pink	0.876859
FASLG	DDX58	0.343427	3.01843e-52	pink	1.03028
FASLG	TARDBP	0.117992	3.69798e-07	pink	0.353977
FASLG	APP	0.105487	5.57598e-06	pink	0.316461
FASLG	TNFRSF21	0.104431	6.91984e-06	pink	0.313292
MLKL	RIPK1	0.115844	6.01606e-07	pink	0.347533
MLKL	RIPK3	0.426903	1.19022e-82	pink	1.28071
MLKL	TLR3	0.216742	4.58862e-21	pink	0.650226
MLKL	CASP8	0.247445	3.73178e-27	pink	0.742336
MLKL	ZBP1	0.61584	3.49113e-193	pink	1.84752
MLKL	MAPK8	-0.111233	1.66139e-06	#6495ED	0.333699
MLKL	SIRT3	-0.130788	1.70277e-08	#6495ED	0.392365
MLKL	TNFRSF1A	0.1549	2.21311e-11	pink	0.464701
MLKL	TNFSF10	0.605356	5.31045e-185	pink	1.81607
MLKL	TNFRSF1B	0.419027	2.15224e-79	pink	1.25708
MLKL	OTULIN	0.20796	1.7509e-19	pink	0.62388
MLKL	CYLD	0.315729	5.24134e-44	pink	0.947186
MLKL	USP22	-0.167274	4.72138e-13	#6495ED	0.501821
MLKL	SQSTM1	0.111057	1.72569e-06	pink	0.333171
MLKL	STAT3	0.229558	1.68597e-23	pink	0.688673
MLKL	CFLAR	0.522117	1.26605e-129	pink	1.56635
MLKL	AXL	0.164248	1.24362e-12	pink	0.492745
MLKL	HSPA4	0.235854	9.43385e-25	pink	0.707563
MLKL	STUB1	-0.164002	1.34466e-12	#6495ED	0.492005
MLKL	MPG	-0.0989655	2.04752e-05	#6495ED	0.296897
MLKL	GATA3	0.13186	1.29757e-08	pink	0.39558
MLKL	ATRX	-0.101993	1.13028e-05	#6495ED	0.305979
MLKL	HSP90AA1	0.223516	2.47501e-22	pink	0.670548
MLKL	LEF1	0.285726	5.11164e-36	pink	0.857179
MLKL	CD40	0.529641	5.19958e-134	pink	1.58892
MLKL	BCL2L11	0.408106	5.10318e-75	pink	1.22432
MLKL	DDX58	0.430534	3.50362e-84	pink	1.2916
RIPK1	RIPK3	0.499347	5.30561e-117	pink	1.49804
RIPK1	TLR3	0.56162	6.05244e-154	pink	1.68486
RIPK1	TNF	0.151911	5.36029e-11	pink	0.455734
RIPK1	TSC1	0.437556	3.38883e-87	pink	1.31267
RIPK1	TRIM11	0.402076	1.13348e-72	pink	1.20623
RIPK1	CASP8	0.665737	9.46964e-237	pink	1.99721
RIPK1	ZBP1	0.20066	3.19756e-18	pink	0.601981
RIPK1	MAPK8	0.433251	2.43546e-85	pink	1.29975
RIPK1	IPMK	0.437758	2.76985e-87	pink	1.31327
RIPK1	ITPK1	-0.125118	6.91937e-08	#6495ED	0.375353
RIPK1	SIRT3	0.34542	7.13899e-53	pink	1.03626
RIPK1	MYC	0.329607	4.98438e-48	pink	0.988822
RIPK1	TNFRSF1A	0.6315	5.35901e-206	pink	1.8945
RIPK1	TNFSF10	0.291841	1.4341e-37	pink	0.875524
RIPK1	TNFRSF1B	0.443949	5.28833e-90	pink	1.33185
RIPK1	TRAF2	0.523438	2.18664e-130	pink	1.57032
RIPK1	PANX1	0.50996	9.12876e-123	pink	1.52988
RIPK1	OTULIN	0.749026	0	pink	2.24708
RIPK1	CYLD	0.432728	4.0758e-85	pink	1.29819
RIPK1	USP22	0.559327	1.92313e-152	pink	1.67798
RIPK1	MAP3K7	0.680376	3.45719e-251	pink	2.04113
RIPK1	SQSTM1	0.698737	1.54499e-270	pink	2.09621
RIPK1	STAT3	0.772861	0	pink	2.31858
RIPK1	DIABLO	0.557955	1.50474e-151	pink	1.67387
RIPK1	DNMT1	0.681933	8.96487e-253	pink	2.0458
RIPK1	CFLAR	0.516705	1.54744e-126	pink	1.55012
RIPK1	BRAF	0.487608	7.38098e-111	pink	1.46282
RIPK1	AXL	0.462521	1.66113e-98	pink	1.38756
RIPK1	ID1	0.213061	2.15327e-20	pink	0.639184
RIPK1	CDKN2A	0.234465	1.79519e-24	pink	0.703396
RIPK1	HSPA4	0.653325	3.87424e-225	pink	1.95998
RIPK1	BCL2	0.25334	1.99841e-28	pink	0.760021
RIPK1	STUB1	0.313601	2.07772e-43	pink	0.940802
RIPK1	FLT3	0.334419	1.79267e-49	pink	1.00326
RIPK1	HAT1	0.721783	5.06652e-297	pink	2.16535
RIPK1	SIRT2	0.134052	7.39216e-09	pink	0.402156
RIPK1	SIRT1	0.478235	4.01881e-106	pink	1.4347
RIPK1	PLK1	0.561078	1.37386e-153	pink	1.68323
RIPK1	MPG	0.505849	1.64979e-120	pink	1.51755
RIPK1	BACH2	0.557759	2.01857e-151	pink	1.67328
RIPK1	GATA3	0.266335	2.3949e-31	pink	0.799006
RIPK1	MYCN	0.168297	3.3885e-13	pink	0.504892
RIPK1	ALK	0.200765	3.06971e-18	pink	0.602294
RIPK1	ATRX	0.485646	7.43514e-110	pink	1.45694
RIPK1	TERT	0.126247	5.25877e-08	pink	0.378741
RIPK1	SLC39A7	0.756762	0	pink	2.27029
RIPK1	SPATA2	0.277541	5.32391e-34	pink	0.832624
RIPK1	RNF31	0.59992	7.05922e-181	pink	1.79976
RIPK1	IDH1	0.650573	1.22742e-222	pink	1.95172
RIPK1	IDH2	0.407172	1.18649e-74	pink	1.22152
RIPK1	KLF9	0.513441	1.05864e-124	pink	1.54032
RIPK1	HDAC9	0.40127	2.31411e-72	pink	1.20381
RIPK1	HSP90AA1	0.186192	7.32632e-16	pink	0.558576
RIPK1	LEF1	0.470787	1.83411e-102	pink	1.41236
RIPK1	BNIP3	0.25672	3.60435e-29	pink	0.770159
RIPK1	CD40	0.499601	3.87992e-117	pink	1.4988
RIPK1	BCL2L11	0.43745	3.76912e-87	pink	1.31235
RIPK1	EGFR	0.38233	2.55155e-65	pink	1.14699
RIPK1	DDX58	0.452763	5.67024e-94	pink	1.35829
RIPK1	TARDBP	0.723642	2.82001e-299	pink	2.17093
RIPK1	APP	0.385787	1.43049e-66	pink	1.15736
RIPK1	TNFRSF21	0.31229	4.82433e-43	pink	0.936871
RIPK3	TLR3	0.661779	5.49258e-233	pink	1.98534
RIPK3	TNF	0.233789	2.45173e-24	pink	0.701368
RIPK3	CASP8	0.715904	5.14859e-290	pink	2.14771
RIPK3	ZBP1	0.513437	1.06488e-124	pink	1.54031
RIPK3	IPMK	0.180121	6.31285e-15	pink	0.540363
RIPK3	MYC	0.221761	5.32408e-22	pink	0.665282
RIPK3	TNFRSF1A	0.55371	8.22674e-149	pink	1.66113
RIPK3	TNFSF10	0.611185	1.6347e-189	pink	1.83356
RIPK3	TNFRSF1B	0.805767	0	pink	2.4173
RIPK3	PANX1	0.352902	2.89491e-55	pink	1.05871
RIPK3	OTULIN	0.52102	5.4042e-129	pink	1.56306
RIPK3	CYLD	0.426578	1.6289e-82	pink	1.27973
RIPK3	MAP3K7	0.265508	3.71631e-31	pink	0.796525
RIPK3	SQSTM1	0.465762	4.80569e-100	pink	1.39729
RIPK3	STAT3	0.583965	3.20219e-169	pink	1.75189
RIPK3	DIABLO	0.306459	1.94692e-41	pink	0.919376
RIPK3	DNMT1	0.156526	1.35807e-11	pink	0.469577
RIPK3	CFLAR	0.390425	2.83883e-68	pink	1.17128
RIPK3	AXL	0.563235	5.20996e-155	pink	1.6897
RIPK3	ID1	0.262644	1.68234e-30	pink	0.787932
RIPK3	CDKN2A	0.181318	4.15355e-15	pink	0.543953
RIPK3	HSPA4	0.390781	2.09555e-68	pink	1.17234
RIPK3	BCL2	0.224909	1.34174e-22	pink	0.674726
RIPK3	HAT1	0.467506	7.03545e-101	pink	1.40252
RIPK3	SIRT2	0.232522	4.38574e-24	pink	0.697565
RIPK3	SIRT1	0.11948	2.62672e-07	pink	0.358439
RIPK3	PLK1	0.230766	9.75828e-24	pink	0.692299
RIPK3	MPG	0.292126	1.21186e-37	pink	0.876378
RIPK3	GATA3	0.29679	7.45237e-39	pink	0.890371
RIPK3	SLC39A7	0.451924	1.36912e-93	pink	1.35577
RIPK3	RNF31	0.241473	6.69799e-26	pink	0.724418
RIPK3	IDH1	0.450155	8.71753e-93	pink	1.35046
RIPK3	IDH2	0.301645	3.87e-40	pink	0.904934
RIPK3	KLF9	0.124345	8.33581e-08	pink	0.373036
RIPK3	HDAC9	0.184439	1.37464e-15	pink	0.553318
RIPK3	LEF1	0.430121	5.24374e-84	pink	1.29036
RIPK3	CD40	0.516016	3.7911e-126	pink	1.54805
RIPK3	BCL2L11	0.431143	1.93238e-84	pink	1.29343
RIPK3	EGFR	0.170349	1.73186e-13	pink	0.511047
RIPK3	DDX58	0.515216	1.0697e-125	pink	1.54565
RIPK3	TARDBP	0.347518	1.54671e-53	pink	1.04255
RIPK3	APP	0.198214	8.2572e-18	pink	0.594643
RIPK3	TNFRSF21	0.2968	7.40795e-39	pink	0.890401
TLR3	TNF	0.237001	5.52925e-25	pink	0.711003
TLR3	TSC1	-0.0995458	1.82948e-05	#6495ED	0.298638
TLR3	TRIM11	-0.169565	2.2407e-13	#6495ED	0.508694
TLR3	CASP8	0.756195	0	pink	2.26859
TLR3	ZBP1	0.398579	2.47448e-71	pink	1.19574
TLR3	MAPK8	0.178015	1.30965e-14	pink	0.534046
TLR3	IPMK	0.293771	4.55986e-38	pink	0.881312
TLR3	MYC	0.325319	9.18413e-47	pink	0.975956
TLR3	TNFRSF1A	0.631129	1.09821e-205	pink	1.89339
TLR3	TNFSF10	0.462461	1.7738e-98	pink	1.38738
TLR3	TNFRSF1B	0.630469	3.93787e-205	pink	1.89141
TLR3	PANX1	0.567496	7.54438e-158	pink	1.70249
TLR3	OTULIN	0.598751	5.31165e-180	pink	1.79625
TLR3	CYLD	0.41413	2.06383e-77	pink	1.24239
TLR3	USP22	0.152442	4.58672e-11	pink	0.457326
TLR3	MAP3K7	0.267519	1.27351e-31	pink	0.802556
TLR3	SQSTM1	0.511335	1.57898e-123	pink	1.53401
TLR3	STAT3	0.714281	4.11754e-288	pink	2.14284
TLR3	DIABLO	0.491302	9.12619e-113	pink	1.47391
TLR3	DNMT1	0.111942	1.42483e-06	pink	0.335826
TLR3	CFLAR	0.204131	8.14711e-19	pink	0.612392
TLR3	AXL	0.74739	0	pink	2.24217
TLR3	ID1	0.250212	9.53737e-28	pink	0.750636
TLR3	CDKN2A	0.216709	4.65255e-21	pink	0.650128
TLR3	HSPA4	0.511795	8.76393e-124	pink	1.53539
TLR3	BCL2	0.474003	4.95071e-104	pink	1.42201
TLR3	FLT3	-0.16406	1.32009e-12	#6495ED	0.49218
TLR3	HAT1	0.684838	9.29351e-256	pink	2.05451
TLR3	SIRT2	0.223014	3.083e-22	pink	0.669043
TLR3	SIRT1	0.190493	1.5228e-16	pink	0.571479
TLR3	PLK1	0.270304	2.84363e-32	pink	0.810913
TLR3	MPG	0.375237	8.44738e-63	pink	1.12571
TLR3	BACH2	0.182202	3.04309e-15	pink	0.546605
TLR3	GATA3	0.261261	3.46552e-30	pink	0.783782
TLR3	MYCN	0.201269	2.51983e-18	pink	0.603808
TLR3	ALK	0.247261	4.08484e-27	pink	0.741782
TLR3	ATRX	0.260874	4.23722e-30	pink	0.782623
TLR3	SLC39A7	0.554469	2.68162e-149	pink	1.66341
TLR3	SPATA2	0.10018	1.6166e-05	pink	0.300539
TLR3	RNF31	0.115064	7.16405e-07	pink	0.345192
TLR3	IDH1	0.59804	1.80382e-179	pink	1.79412
TLR3	IDH2	0.536123	7.0331e-138	pink	1.60837
TLR3	KLF9	0.229566	1.67943e-23	pink	0.688699
TLR3	HDAC9	0.382551	2.12396e-65	pink	1.14765
TLR3	LEF1	0.439938	3.09983e-88	pink	1.31981
TLR3	CD40	0.283953	1.41743e-35	pink	0.851859
TLR3	BCL2L11	0.52384	1.28107e-130	pink	1.57152
TLR3	EGFR	0.359466	2.03773e-57	pink	1.0784
TLR3	DDX58	0.605441	4.56566e-185	pink	1.81632
TLR3	TARDBP	0.413382	4.11558e-77	pink	1.24015
TLR3	APP	0.418304	4.24088e-79	pink	1.25491
TLR3	TNFRSF21	0.396387	1.67657e-70	pink	1.18916
TNF	CASP8	0.164705	1.07576e-12	pink	0.494115
TNF	MAPK8	0.116118	5.65714e-07	pink	0.348354
TNF	IPMK	0.17686	1.94726e-14	pink	0.530579
TNF	MYC	0.251483	5.06663e-28	pink	0.75445
TNF	TNFRSF1A	0.177777	1.42163e-14	pink	0.533331
TNF	TNFSF10	0.150188	8.85722e-11	pink	0.450563
TNF	TNFRSF1B	0.235424	1.15177e-24	pink	0.706273
TNF	PANX1	0.195831	2.05659e-17	pink	0.587494
TNF	OTULIN	0.18808	3.69302e-16	pink	0.56424
TNF	CYLD	0.11242	1.28396e-06	pink	0.33726
TNF	MAP3K7	0.0914575	8.31726e-05	pink	0.274373
TNF	SQSTM1	0.167932	3.81526e-13	pink	0.503796
TNF	STAT3	0.238672	2.52561e-25	pink	0.716015
TNF	DIABLO	0.183313	2.05312e-15	pink	0.54994
TNF	AXL	0.317752	1.4001e-44	pink	0.953257
TNF	ID1	0.280286	1.14076e-34	pink	0.840858
TNF	HSPA4	0.120516	2.06452e-07	pink	0.361549
TNF	BCL2	0.247817	3.1107e-27	pink	0.74345
TNF	HAT1	0.208457	1.43111e-19	pink	0.62537
TNF	SIRT2	0.174664	4.10839e-14	pink	0.523991
TNF	SIRT1	0.149155	1.19323e-10	pink	0.447466
TNF	MPG	0.185978	7.91271e-16	pink	0.557935
TNF	MYCN	0.158828	6.74044e-12	pink	0.476484
TNF	SLC39A7	0.206112	3.69176e-19	pink	0.618335
TNF	IDH1	0.171051	1.37394e-13	pink	0.513152
TNF	IDH2	0.193152	5.65798e-17	pink	0.579457
TNF	LEF1	0.125	7.11807e-08	pink	0.375001
TNF	BCL2L11	0.215996	6.29241e-21	pink	0.647987
TNF	DDX58	0.131453	1.43919e-08	pink	0.394358
TNF	TARDBP	0.152145	5.00507e-11	pink	0.456435
TNF	APP	0.121388	1.68343e-07	pink	0.364164
TNF	TNFRSF21	0.266765	1.90479e-31	pink	0.800295
TSC1	TRIM11	0.880988	0	pink	2.64296
TSC1	CASP8	-0.107456	3.70743e-06	#6495ED	0.322369
TSC1	MAPK8	0.678491	2.78575e-249	pink	2.03547
TSC1	IPMK	0.475957	5.40492e-105	pink	1.42787
TSC1	SIRT3	0.549701	2.91437e-146	pink	1.6491
TSC1	TNFRSF1A	-0.186522	6.50335e-16	#6495ED	0.559565
TSC1	TNFSF10	-0.104741	6.49582e-06	#6495ED	0.314223
TSC1	TNFRSF1B	-0.157445	1.02793e-11	#6495ED	0.472336
TSC1	TRAF2	0.762976	0	pink	2.28893
TSC1	OTULIN	0.324149	2.0173e-46	pink	0.972446
TSC1	CYLD	0.407354	1.00683e-74	pink	1.22206
TSC1	USP22	0.763775	0	pink	2.29133
TSC1	MAP3K7	0.745782	0	pink	2.23734
TSC1	SQSTM1	0.271205	1.7451e-32	pink	0.813614
TSC1	STAT3	0.113076	1.11215e-06	pink	0.339229
TSC1	DNMT1	0.759665	0	pink	2.279
TSC1	CFLAR	0.576326	7.25601e-164	pink	1.72898
TSC1	BRAF	0.842458	0	pink	2.52737
TSC1	AXL	-0.130602	1.7848e-08	#6495ED	0.391806
TSC1	ID1	-0.0957173	3.80223e-05	#6495ED	0.287152
TSC1	HSPA4	0.17158	1.15296e-13	pink	0.514741
TSC1	STUB1	0.350214	2.12987e-54	pink	1.05064
TSC1	FLT3	0.783029	0	pink	2.34909
TSC1	SIRT1	0.656893	2.02816e-228	pink	1.97068
TSC1	PLK1	0.158193	8.1867e-12	pink	0.474578
TSC1	MPG	0.113915	9.24559e-07	pink	0.341746
TSC1	BACH2	0.662766	6.3979e-234	pink	1.9883
TSC1	ATRX	0.539951	3.3315e-140	pink	1.61985
TSC1	SLC39A7	0.154072	2.83306e-11	pink	0.462215
TSC1	SPATA2	0.516963	1.10648e-126	pink	1.55089
TSC1	RNF31	0.69162	7.26702e-263	pink	2.07486
TSC1	IDH2	-0.168811	2.86618e-13	#6495ED	0.506434
TSC1	KLF9	0.628537	1.6205e-203	pink	1.88561
TSC1	HDAC9	0.231887	5.86229e-24	pink	0.69566
TSC1	HSP90AA1	0.266066	2.76436e-31	pink	0.798197
TSC1	LEF1	-0.152105	5.06396e-11	#6495ED	0.456315
TSC1	BNIP3	0.357654	8.10049e-57	pink	1.07296
TSC1	CD40	0.410678	4.92259e-76	pink	1.23203
TSC1	TARDBP	0.589168	5.95951e-173	pink	1.7675
TSC1	APP	0.107569	3.62079e-06	pink	0.322708
TRIM11	CASP8	-0.120515	2.06542e-07	#6495ED	0.361544
TRIM11	MAPK8	0.461725	3.94354e-98	pink	1.38517
TRIM11	IPMK	0.282227	3.79821e-35	pink	0.84668
TRIM11	ITPK1	-0.178632	1.05867e-14	#6495ED	0.535895
TRIM11	SIRT3	0.410637	5.11039e-76	pink	1.23191
TRIM11	MYC	-0.12388	9.321e-08	#6495ED	0.37164
TRIM11	TNFRSF1A	-0.178189	1.2335e-14	#6495ED	0.534567
TRIM11	TNFSF10	-0.125178	6.81834e-08	#6495ED	0.375535
TRIM11	TNFRSF1B	-0.17535	3.25642e-14	#6495ED	0.526051
TRIM11	TRAF2	0.805307	0	pink	2.41592
TRIM11	PANX1	-0.0964764	3.29587e-05	#6495ED	0.289429
TRIM11	OTULIN	0.212042	3.28729e-20	pink	0.636126
TRIM11	CYLD	0.238795	2.38347e-25	pink	0.716384
TRIM11	USP22	0.635048	5.27382e-209	pink	1.90514
TRIM11	MAP3K7	0.603787	8.38332e-184	pink	1.81136
TRIM11	SQSTM1	0.217077	3.98025e-21	pink	0.651232
TRIM11	DNMT1	0.779239	0	pink	2.33772
TRIM11	CFLAR	0.577928	5.6158e-165	pink	1.73378
TRIM11	BRAF	0.694973	1.88118e-266	pink	2.08492
TRIM11	AXL	-0.220014	1.13335e-21	#6495ED	0.660043
TRIM11	ID1	-0.1582	8.16944e-12	#6495ED	0.474599
TRIM11	BCL2	-0.267912	1.03145e-31	#6495ED	0.803737
TRIM11	STUB1	0.301576	4.0366e-40	pink	0.904728
TRIM11	FLT3	0.806177	0	pink	2.41853
TRIM11	SIRT1	0.498325	1.85871e-116	pink	1.49497
TRIM11	PLK1	0.192296	7.79525e-17	pink	0.576887
TRIM11	MPG	0.0963447	3.37885e-05	pink	0.289034
TRIM11	BACH2	0.534217	9.8487e-137	pink	1.60265
TRIM11	MYCN	-0.107114	3.98175e-06	#6495ED	0.321343
TRIM11	ALK	-0.165102	9.48064e-13	#6495ED	0.495305
TRIM11	ATRX	0.365784	1.54645e-59	pink	1.09735
TRIM11	SLC39A7	0.094259	4.98911e-05	pink	0.282777
TRIM11	SPATA2	0.34595	4.85692e-53	pink	1.03785
TRIM11	RNF31	0.677075	7.37328e-248	pink	2.03122
TRIM11	IDH1	-0.100629	1.4804e-05	#6495ED	0.301886
TRIM11	IDH2	-0.277577	5.21846e-34	#6495ED	0.832731
TRIM11	KLF9	0.53127	5.64576e-135	pink	1.59381
TRIM11	HSP90AA1	0.220812	8.033e-22	pink	0.662436
TRIM11	LEF1	-0.168628	3.04246e-13	#6495ED	0.505885
TRIM11	BNIP3	0.233444	2.87337e-24	pink	0.700332
TRIM11	CD40	0.476983	1.68119e-105	pink	1.43095
TRIM11	BCL2L11	-0.125242	6.71402e-08	#6495ED	0.375726
TRIM11	TARDBP	0.466645	1.81853e-100	pink	1.39994
TRIM11	TNFRSF21	-0.160007	4.6894e-12	#6495ED	0.480022
CASP8	ZBP1	0.341033	1.68198e-51	pink	1.0231
CASP8	IPMK	0.126995	4.37866e-08	pink	0.380986
CASP8	ITPK1	-0.156269	1.46728e-11	#6495ED	0.468808
CASP8	MYC	0.247022	4.59171e-27	pink	0.741065
CASP8	TNFRSF1A	0.778922	0	pink	2.33677
CASP8	TNFSF10	0.508797	3.9974e-122	pink	1.52639
CASP8	TNFRSF1B	0.661267	1.66699e-232	pink	1.9838
CASP8	PANX1	0.472123	4.11147e-103	pink	1.41637
CASP8	OTULIN	0.623882	1.13226e-199	pink	1.87164
CASP8	CYLD	0.392469	4.94536e-69	pink	1.17741
CASP8	USP22	0.108795	2.79796e-06	pink	0.326384
CASP8	MAP3K7	0.278875	2.52412e-34	pink	0.836625
CASP8	SQSTM1	0.562368	1.947e-154	pink	1.6871
CASP8	STAT3	0.721569	9.15991e-297	pink	2.16471
CASP8	DIABLO	0.434443	7.50312e-86	pink	1.30333
CASP8	DNMT1	0.181226	4.28874e-15	pink	0.543679
CASP8	CFLAR	0.270726	2.26309e-32	pink	0.812178
CASP8	AXL	0.604772	1.48611e-184	pink	1.81431
CASP8	ID1	0.182135	3.11569e-15	pink	0.546404
CASP8	CDKN2A	0.262883	1.48445e-30	pink	0.788648
CASP8	HSPA4	0.567481	7.72746e-158	pink	1.70244
CASP8	BCL2	0.290894	2.50987e-37	pink	0.872681
CASP8	FLT3	-0.129123	2.58678e-08	#6495ED	0.387368
CASP8	HAT1	0.7017	8.46166e-274	pink	2.1051
CASP8	SIRT2	0.0997737	1.75005e-05	pink	0.299321
CASP8	PLK1	0.401456	1.96396e-72	pink	1.20437
CASP8	MPG	0.386686	6.72374e-67	pink	1.16006
CASP8	BACH2	0.111464	1.58028e-06	pink	0.334393
CASP8	GATA3	0.345946	4.86942e-53	pink	1.03784
CASP8	MYCN	0.105392	5.68583e-06	pink	0.316176
CASP8	ALK	0.258021	1.85129e-29	pink	0.774062
CASP8	ATRX	0.218438	2.22898e-21	pink	0.655315
CASP8	TERT	0.175285	3.32975e-14	pink	0.525854
CASP8	SLC39A7	0.578429	2.5151e-165	pink	1.73529
CASP8	RNF31	0.132877	1.00065e-08	pink	0.39863
CASP8	IDH1	0.641366	1.85864e-214	pink	1.9241
CASP8	IDH2	0.442963	1.44577e-89	pink	1.32889
CASP8	KLF9	0.139772	1.63054e-09	pink	0.419317
CASP8	HDAC9	0.318519	8.4687e-45	pink	0.955557
CASP8	LEF1	0.61113	1.80403e-189	pink	1.83339
CASP8	CD40	0.38206	3.18925e-65	pink	1.14618
CASP8	BCL2L11	0.442623	2.04438e-89	pink	1.32787
CASP8	EGFR	0.382421	2.36652e-65	pink	1.14726
CASP8	DDX58	0.491046	1.24051e-112	pink	1.47314
CASP8	TARDBP	0.409794	1.10192e-75	pink	1.22938
CASP8	APP	0.374786	1.21592e-62	pink	1.12436
CASP8	TNFRSF21	0.2819	4.57298e-35	pink	0.845701
ZBP1	TNFRSF1A	0.180188	6.16682e-15	pink	0.540564
ZBP1	TNFSF10	0.70482	2.80488e-277	pink	2.11446
ZBP1	TNFRSF1B	0.391478	1.15606e-68	pink	1.17443
ZBP1	PANX1	0.163743	1.45934e-12	pink	0.491229
ZBP1	OTULIN	0.224052	1.9561e-22	pink	0.672157
ZBP1	CYLD	0.328728	9.09156e-48	pink	0.986185
ZBP1	MAP3K7	0.0941807	5.06183e-05	pink	0.282542
ZBP1	SQSTM1	0.207711	1.93649e-19	pink	0.623134
ZBP1	STAT3	0.267094	1.59809e-31	pink	0.801282
ZBP1	DIABLO	0.111814	1.46507e-06	pink	0.335441
ZBP1	CFLAR	0.435363	3.0136e-86	pink	1.30609
ZBP1	AXL	0.259307	9.54731e-30	pink	0.77792
ZBP1	ID1	0.0988583	2.09044e-05	pink	0.296575
ZBP1	HSPA4	0.212918	2.28504e-20	pink	0.638755
ZBP1	HAT1	0.170069	1.89868e-13	pink	0.510208
ZBP1	GATA3	0.148253	1.54585e-10	pink	0.444758
ZBP1	SLC39A7	0.155265	1.98463e-11	pink	0.465794
ZBP1	RNF31	0.192649	6.83205e-17	pink	0.577946
ZBP1	IDH1	0.129714	2.23148e-08	pink	0.389141
ZBP1	IDH2	0.138079	2.56743e-09	pink	0.414236
ZBP1	LEF1	0.224419	1.66516e-22	pink	0.673256
ZBP1	CD40	0.482382	3.36099e-108	pink	1.44715
ZBP1	BCL2L11	0.448444	5.16709e-92	pink	1.34533
ZBP1	EGFR	0.099713	1.77091e-05	pink	0.299139
ZBP1	DDX58	0.70975	7.19806e-283	pink	2.12925
ZBP1	TARDBP	0.129175	2.55329e-08	pink	0.387524
MAPK8	IPMK	0.792082	0	pink	2.37625
MAPK8	ITPK1	0.257131	2.92111e-29	pink	0.771393
MAPK8	SIRT3	0.498741	1.1162e-116	pink	1.49622
MAPK8	MYC	0.351435	8.627e-55	pink	1.0543
MAPK8	TRAF2	0.502738	8.0381e-119	pink	1.50821
MAPK8	PANX1	0.562434	1.76043e-154	pink	1.6873
MAPK8	OTULIN	0.535676	1.30787e-137	pink	1.60703
MAPK8	CYLD	0.475721	7.07164e-105	pink	1.42716
MAPK8	USP22	0.835438	0	pink	2.50632
MAPK8	MAP3K7	0.742807	9.88131291682493e-324	pink	2.22842
MAPK8	SQSTM1	0.367999	2.71923e-60	pink	1.104
MAPK8	STAT3	0.38246	2.29142e-65	pink	1.14738
MAPK8	DIABLO	0.462183	2.39861e-98	pink	1.38655
MAPK8	DNMT1	0.566582	3.09042e-157	pink	1.69975
MAPK8	CFLAR	0.340418	2.61028e-51	pink	1.02125
MAPK8	BRAF	0.790375	0	pink	2.37112
MAPK8	AXL	0.12442	8.18795e-08	pink	0.373259
MAPK8	ID1	0.179239	8.57991e-15	pink	0.537716
MAPK8	HSPA4	0.441	1.06066e-88	pink	1.323
MAPK8	BCL2	0.267309	1.42451e-31	pink	0.801927
MAPK8	STUB1	0.433676	1.60131e-85	pink	1.30103
MAPK8	FLT3	0.424024	1.88924e-81	pink	1.27207
MAPK8	HAT1	0.339763	4.15915e-51	pink	1.01929
MAPK8	SIRT2	0.237955	3.53689e-25	pink	0.713866
MAPK8	SIRT1	0.785489	0	pink	2.35647
MAPK8	PLK1	0.231729	6.29846e-24	pink	0.695187
MAPK8	MPG	0.356177	2.47726e-56	pink	1.06853
MAPK8	BACH2	0.701613	1.05497e-273	pink	2.10484
MAPK8	MYCN	0.326471	4.21719e-47	pink	0.979413
MAPK8	ALK	0.153846	3.02921e-11	pink	0.461539
MAPK8	ATRX	0.693295	1.19004e-264	pink	2.07989
MAPK8	TERT	-0.109012	2.67205e-06	#6495ED	0.327036
MAPK8	SLC39A7	0.394924	5.96687e-70	pink	1.18477
MAPK8	SPATA2	0.48972	6.02704e-112	pink	1.46916
MAPK8	RNF31	0.462675	1.40476e-98	pink	1.38803
MAPK8	IDH1	0.30122	5.02375e-40	pink	0.903661
MAPK8	IDH2	0.19666	1.49959e-17	pink	0.589979
MAPK8	KLF9	0.59315	7.48528e-176	pink	1.77945
MAPK8	HDAC9	0.528702	1.85834e-133	pink	1.58611
MAPK8	HSP90AA1	0.250262	9.30209e-28	pink	0.750787
MAPK8	BNIP3	0.482513	2.8872e-108	pink	1.44754
MAPK8	CD40	0.191471	1.05979e-16	pink	0.574413
MAPK8	BCL2L11	0.307357	1.10752e-41	pink	0.92207
MAPK8	DDX58	0.180673	5.20591e-15	pink	0.542019
MAPK8	TARDBP	0.685924	6.9705e-257	pink	2.05777
MAPK8	APP	0.528335	3.05744e-133	pink	1.585
MAPK8	TNFRSF21	0.373878	2.52662e-62	pink	1.12163
IPMK	ITPK1	0.221344	6.37937e-22	pink	0.664032
IPMK	SIRT3	0.348606	6.9664e-54	pink	1.04582
IPMK	MYC	0.558887	3.72583e-152	pink	1.67666
IPMK	TNFRSF1A	0.113774	9.5397e-07	pink	0.341321
IPMK	TNFRSF1B	0.226109	7.88786e-23	pink	0.678328
IPMK	TRAF2	0.404129	1.82397e-73	pink	1.21239
IPMK	PANX1	0.659189	1.48291e-230	pink	1.97757
IPMK	OTULIN	0.589957	1.59884e-173	pink	1.76987
IPMK	CYLD	0.418151	4.89547e-79	pink	1.25445
IPMK	USP22	0.665767	8.84639e-237	pink	1.9973
IPMK	MAP3K7	0.693498	7.22066e-265	pink	2.08049
IPMK	SQSTM1	0.400394	5.01645e-72	pink	1.20118
IPMK	STAT3	0.522316	9.71477e-130	pink	1.56695
IPMK	DIABLO	0.601368	5.72528e-182	pink	1.8041
IPMK	DNMT1	0.468027	3.95392e-101	pink	1.40408
IPMK	CFLAR	0.274941	2.2541e-33	pink	0.824824
IPMK	BRAF	0.587702	6.81168e-172	pink	1.76311
IPMK	AXL	0.271311	1.64677e-32	pink	0.813934
IPMK	ID1	0.377171	1.76174e-63	pink	1.13151
IPMK	CDKN2A	0.107356	3.78612e-06	pink	0.322067
IPMK	HSPA4	0.475475	9.34781e-105	pink	1.42642
IPMK	BCL2	0.399502	1.10022e-71	pink	1.19851
IPMK	STUB1	0.295348	1.77538e-38	pink	0.886043
IPMK	FLT3	0.20791	1.78675e-19	pink	0.62373
IPMK	HAT1	0.473519	8.54198e-104	pink	1.42056
IPMK	SIRT2	0.329884	4.12357e-48	pink	0.989652
IPMK	SIRT1	0.873635	0	pink	2.62091
IPMK	PLK1	0.247701	3.2918e-27	pink	0.743104
IPMK	MPG	0.407116	1.24899e-74	pink	1.22135
IPMK	BACH2	0.673104	6.5301e-244	pink	2.01931
IPMK	MYCN	0.450067	9.55455e-93	pink	1.3502
IPMK	ALK	0.203635	9.91932e-19	pink	0.610905
IPMK	ATRX	0.600517	2.5069e-181	pink	1.80155
IPMK	SLC39A7	0.516601	1.77276e-126	pink	1.5498
IPMK	SPATA2	0.301347	4.64591e-40	pink	0.904042
IPMK	RNF31	0.391083	1.62063e-68	pink	1.17325
IPMK	IDH1	0.440352	2.04069e-88	pink	1.32106
IPMK	IDH2	0.341997	8.4401e-52	pink	1.02599
IPMK	KLF9	0.477403	1.04067e-105	pink	1.43221
IPMK	HDAC9	0.50489	5.48957e-120	pink	1.51467
IPMK	HSP90AA1	0.220644	8.63695e-22	pink	0.661932
IPMK	BNIP3	0.340574	2.33414e-51	pink	1.02172
IPMK	CD40	0.167067	5.04695e-13	pink	0.501202
IPMK	BCL2L11	0.462834	1.18156e-98	pink	1.3885
IPMK	DDX58	0.283388	1.95834e-35	pink	0.850165
IPMK	TARDBP	0.666679	1.17971e-237	pink	2.00004
IPMK	APP	0.506306	9.28957e-121	pink	1.51892
IPMK	TNFRSF21	0.524339	6.58329e-131	pink	1.57302
ITPK1	SIRT3	0.406842	1.59912e-74	pink	1.22052
ITPK1	MYC	0.179751	7.18045e-15	pink	0.539254
ITPK1	TNFRSF1A	-0.110511	1.94087e-06	#6495ED	0.331533
ITPK1	TNFSF10	-0.111126	1.70029e-06	#6495ED	0.333378
ITPK1	PANX1	0.286466	3.33284e-36	pink	0.859399
ITPK1	CYLD	0.23876	2.42285e-25	pink	0.71628
ITPK1	USP22	0.210777	5.54058e-20	pink	0.632331
ITPK1	SQSTM1	0.108517	2.96697e-06	pink	0.325551
ITPK1	DIABLO	0.236515	6.93594e-25	pink	0.709546
ITPK1	DNMT1	-0.154909	2.20711e-11	#6495ED	0.464728
ITPK1	CFLAR	-0.203536	1.03179e-18	#6495ED	0.610607
ITPK1	BRAF	0.10569	5.34821e-06	pink	0.317069
ITPK1	AXL	0.189107	2.53631e-16	pink	0.567322
ITPK1	ID1	0.13161	1.38278e-08	pink	0.39483
ITPK1	BCL2	0.438069	2.0276e-87	pink	1.31421
ITPK1	STUB1	0.388609	1.32766e-67	pink	1.16583
ITPK1	FLT3	-0.196732	1.45868e-17	#6495ED	0.590196
ITPK1	SIRT2	0.327686	1.84945e-47	pink	0.983058
ITPK1	SIRT1	0.182607	2.63702e-15	pink	0.547821
ITPK1	PLK1	-0.220036	1.12278e-21	#6495ED	0.660108
ITPK1	MPG	0.152023	5.18759e-11	pink	0.456069
ITPK1	MYCN	0.16822	3.4746e-13	pink	0.50466
ITPK1	ALK	0.327952	1.54357e-47	pink	0.983856
ITPK1	ATRX	0.235776	9.78203e-25	pink	0.707329
ITPK1	SPATA2	0.464082	3.03003e-99	pink	1.39225
ITPK1	IDH2	0.314578	1.10505e-43	pink	0.943735
ITPK1	KLF9	0.156682	1.29559e-11	pink	0.470045
ITPK1	HDAC9	0.339643	4.53001e-51	pink	1.01893
ITPK1	HSP90AA1	0.103192	8.89153e-06	pink	0.309576
ITPK1	LEF1	-0.0916136	8.08682e-05	#6495ED	0.274841
ITPK1	BNIP3	0.245816	8.26837e-27	pink	0.737448
ITPK1	CD40	-0.276985	7.26031e-34	#6495ED	0.830954
ITPK1	BCL2L11	0.101174	1.32949e-05	pink	0.303523
ITPK1	TARDBP	0.0929369	6.36121e-05	pink	0.278811
ITPK1	APP	0.474907	1.77909e-104	pink	1.42472
ITPK1	TNFRSF21	0.320631	2.1039e-45	pink	0.961892
SIRT3	TRAF2	0.46151	4.97717e-98	pink	1.38453
SIRT3	PANX1	0.304991	4.87328e-41	pink	0.914972
SIRT3	OTULIN	0.250991	6.47562e-28	pink	0.752973
SIRT3	CYLD	0.432506	5.07428e-85	pink	1.29752
SIRT3	USP22	0.65286	1.02916e-224	pink	1.95858
SIRT3	MAP3K7	0.502361	1.28353e-118	pink	1.50708
SIRT3	SQSTM1	0.383652	8.51297e-66	pink	1.15096
SIRT3	STAT3	0.211129	4.79301e-20	pink	0.633387
SIRT3	DIABLO	0.30727	1.16942e-41	pink	0.921811
SIRT3	DNMT1	0.376368	3.38337e-63	pink	1.1291
SIRT3	CFLAR	0.201952	1.92802e-18	pink	0.605855
SIRT3	BRAF	0.588064	3.73485e-172	pink	1.76419
SIRT3	AXL	0.148725	1.35032e-10	pink	0.446175
SIRT3	HSPA4	0.295636	1.49313e-38	pink	0.886908
SIRT3	BCL2	0.228376	2.86943e-23	pink	0.685127
SIRT3	STUB1	0.604571	2.11473e-184	pink	1.81371
SIRT3	FLT3	0.236961	5.63355e-25	pink	0.710883
SIRT3	HAT1	0.191883	9.09359e-17	pink	0.575648
SIRT3	SIRT1	0.389645	5.51358e-68	pink	1.16894
SIRT3	PLK1	0.103437	8.46308e-06	pink	0.310311
SIRT3	MPG	0.354878	6.59439e-56	pink	1.06463
SIRT3	BACH2	0.346888	2.45195e-53	pink	1.04066
SIRT3	MYCN	0.107191	3.91849e-06	pink	0.321573
SIRT3	ALK	0.229694	1.58579e-23	pink	0.689081
SIRT3	ATRX	0.442388	2.59451e-89	pink	1.32716
SIRT3	TERT	0.129195	2.54065e-08	pink	0.387584
SIRT3	SLC39A7	0.284359	1.12268e-35	pink	0.853078
SIRT3	SPATA2	0.711764	3.4656e-285	pink	2.13529
SIRT3	RNF31	0.43826	1.67515e-87	pink	1.31478
SIRT3	IDH1	0.1251	6.94868e-08	pink	0.3753
SIRT3	IDH2	0.244622	1.47583e-26	pink	0.733865
SIRT3	KLF9	0.489985	4.40029e-112	pink	1.46995
SIRT3	HDAC9	0.309476	2.9042e-42	pink	0.928427
SIRT3	HSP90AA1	0.202049	1.85542e-18	pink	0.606148
SIRT3	BNIP3	0.415384	6.46003e-78	pink	1.24615
SIRT3	CD40	0.106367	4.65077e-06	pink	0.3191
SIRT3	BCL2L11	0.101148	1.33639e-05	pink	0.303444
SIRT3	DDX58	0.141297	1.07856e-09	pink	0.42389
SIRT3	TARDBP	0.477827	6.41116e-106	pink	1.43348
SIRT3	APP	0.449412	1.8911e-92	pink	1.34824
SIRT3	TNFRSF21	0.11992	2.372e-07	pink	0.35976
MYC	TNFRSF1A	0.369081	1.15825e-60	pink	1.10724
MYC	TNFSF10	0.0943466	4.90889e-05	pink	0.28304
MYC	TNFRSF1B	0.344104	1.85155e-52	pink	1.03231
MYC	PANX1	0.633514	1.06346e-207	pink	1.90054
MYC	OTULIN	0.434427	7.62469e-86	pink	1.30328
MYC	USP22	0.284938	8.05096e-36	pink	0.854814
MYC	MAP3K7	0.291615	1.63986e-37	pink	0.874844
MYC	SQSTM1	0.34041	2.62383e-51	pink	1.02123
MYC	STAT3	0.536206	6.27247e-138	pink	1.60862
MYC	DIABLO	0.643017	6.66312e-216	pink	1.92905
MYC	DNMT1	0.196565	1.55489e-17	pink	0.589695
MYC	AXL	0.374855	1.15011e-62	pink	1.12457
MYC	ID1	0.599471	1.53318e-180	pink	1.79841
MYC	CDKN2A	0.262477	1.8365e-30	pink	0.78743
MYC	HSPA4	0.348339	8.47567e-54	pink	1.04502
MYC	BCL2	0.362934	1.41695e-58	pink	1.0888
MYC	STUB1	0.204726	6.42776e-19	pink	0.614178
MYC	FLT3	-0.18319	2.14521e-15	#6495ED	0.549569
MYC	HAT1	0.547148	1.17649e-144	pink	1.64144
MYC	SIRT2	0.408388	3.95085e-75	pink	1.22517
MYC	SIRT1	0.412338	1.07536e-76	pink	1.23702
MYC	PLK1	0.326099	5.42233e-47	pink	0.978298
MYC	MPG	0.509788	1.13692e-122	pink	1.52936
MYC	BACH2	0.33312	4.4268e-49	pink	0.999359
MYC	GATA3	0.0998037	1.73986e-05	pink	0.299411
MYC	MYCN	0.46253	1.64448e-98	pink	1.38759
MYC	ALK	0.283271	2.09354e-35	pink	0.849814
MYC	ATRX	0.263419	1.12028e-30	pink	0.790256
MYC	SLC39A7	0.587961	4.43306e-172	pink	1.76388
MYC	RNF31	0.155118	2.07376e-11	pink	0.465353
MYC	IDH1	0.545243	1.81683e-143	pink	1.63573
MYC	IDH2	0.502133	1.70177e-118	pink	1.5064
MYC	KLF9	0.151632	5.81705e-11	pink	0.454896
MYC	HDAC9	0.409304	1.72069e-75	pink	1.22791
MYC	LEF1	0.206687	2.92849e-19	pink	0.620062
MYC	BCL2L11	0.427096	9.87686e-83	pink	1.28129
MYC	EGFR	0.141645	9.80639e-10	pink	0.424936
MYC	DDX58	0.219421	1.46308e-21	pink	0.658262
MYC	TARDBP	0.384758	3.38653e-66	pink	1.15427
MYC	APP	0.473126	1.33046e-103	pink	1.41938
MYC	TNFRSF21	0.604691	1.71157e-184	pink	1.81407
TNFRSF1A	TNFSF10	0.329098	7.06225e-48	pink	0.987295
TNFRSF1A	TNFRSF1B	0.627228	1.98418e-202	pink	1.88168
TNFRSF1A	PANX1	0.470962	1.50864e-102	pink	1.41289
TNFRSF1A	OTULIN	0.568712	1.14865e-158	pink	1.70614
TNFRSF1A	CYLD	0.230799	9.61373e-24	pink	0.692398
TNFRSF1A	MAP3K7	0.215815	6.79116e-21	pink	0.647445
TNFRSF1A	SQSTM1	0.613598	2.08301e-191	pink	1.84079
TNFRSF1A	STAT3	0.773707	0	pink	2.32112
TNFRSF1A	DIABLO	0.493151	9.93282e-114	pink	1.47945
TNFRSF1A	DNMT1	0.129731	2.22197e-08	pink	0.389192
TNFRSF1A	CFLAR	0.126273	5.22619e-08	pink	0.378818
TNFRSF1A	AXL	0.613489	2.5386e-191	pink	1.84047
TNFRSF1A	ID1	0.287106	2.30054e-36	pink	0.861318
TNFRSF1A	CDKN2A	0.317412	1.74949e-44	pink	0.952236
TNFRSF1A	HSPA4	0.553484	1.14878e-148	pink	1.66045
TNFRSF1A	BCL2	0.29103	2.31582e-37	pink	0.87309
TNFRSF1A	FLT3	-0.193291	5.37125e-17	#6495ED	0.579873
TNFRSF1A	HAT1	0.703059	2.61251e-275	pink	2.10918
TNFRSF1A	SIRT2	0.111198	1.67397e-06	pink	0.333594
TNFRSF1A	PLK1	0.411265	2.87651e-76	pink	1.2338
TNFRSF1A	MPG	0.451982	1.28774e-93	pink	1.35595
TNFRSF1A	GATA3	0.330372	2.95109e-48	pink	0.991115
TNFRSF1A	MYCN	0.113622	9.86324e-07	pink	0.340867
TNFRSF1A	ALK	0.260428	5.34373e-30	pink	0.781283
TNFRSF1A	ATRX	0.13079	1.70196e-08	pink	0.392371
TNFRSF1A	TERT	0.134011	7.47034e-09	pink	0.402034
TNFRSF1A	SLC39A7	0.647275	1.12743e-219	pink	1.94183
TNFRSF1A	RNF31	0.111334	1.62554e-06	pink	0.334002
TNFRSF1A	IDH1	0.669135	4.98881e-240	pink	2.00741
TNFRSF1A	IDH2	0.496782	1.22298e-115	pink	1.49035
TNFRSF1A	KLF9	0.1266	4.82411e-08	pink	0.3798
TNFRSF1A	HDAC9	0.229398	1.81174e-23	pink	0.688195
TNFRSF1A	LEF1	0.53056	1.48687e-134	pink	1.59168
TNFRSF1A	CD40	0.256177	4.75379e-29	pink	0.768531
TNFRSF1A	BCL2L11	0.360995	6.31619e-58	pink	1.08299
TNFRSF1A	EGFR	0.376269	3.66612e-63	pink	1.12881
TNFRSF1A	DDX58	0.389329	7.20858e-68	pink	1.16799
TNFRSF1A	TARDBP	0.346267	3.85535e-53	pink	1.0388
TNFRSF1A	APP	0.374744	1.25841e-62	pink	1.12423
TNFRSF1A	TNFRSF21	0.323248	3.68779e-46	pink	0.969744
TNFSF10	TNFRSF1B	0.514608	2.35066e-125	pink	1.54382
TNFSF10	PANX1	0.251157	5.96359e-28	pink	0.75347
TNFSF10	OTULIN	0.34081	1.97229e-51	pink	1.02243
TNFSF10	CYLD	0.385242	2.25771e-66	pink	1.15573
TNFSF10	MAP3K7	0.0905286	9.82252e-05	pink	0.271586
TNFSF10	SQSTM1	0.276007	1.24972e-33	pink	0.828022
TNFSF10	STAT3	0.345076	9.16198e-53	pink	1.03523
TNFSF10	DIABLO	0.180031	6.51418e-15	pink	0.540093
TNFSF10	CFLAR	0.531147	6.67542e-135	pink	1.59344
TNFSF10	AXL	0.354702	7.52606e-56	pink	1.06411
TNFSF10	ID1	0.191808	9.34991e-17	pink	0.575424
TNFSF10	CDKN2A	0.116887	4.75583e-07	pink	0.35066
TNFSF10	HSPA4	0.288938	7.91345e-37	pink	0.866813
TNFSF10	FLT3	-0.106806	4.24538e-06	#6495ED	0.320419
TNFSF10	HAT1	0.284462	1.05871e-35	pink	0.853385
TNFSF10	PLK1	0.121616	1.59564e-07	pink	0.364848
TNFSF10	MPG	0.140687	1.27301e-09	pink	0.422062
TNFSF10	GATA3	0.270583	2.44564e-32	pink	0.811748
TNFSF10	SLC39A7	0.25385	1.54628e-28	pink	0.761549
TNFSF10	IDH1	0.232136	5.23106e-24	pink	0.696409
TNFSF10	IDH2	0.160092	4.56798e-12	pink	0.480277
TNFSF10	HDAC9	0.0984715	2.25244e-05	pink	0.295414
TNFSF10	LEF1	0.487076	1.38311e-110	pink	1.46123
TNFSF10	CD40	0.56456	6.89062e-156	pink	1.69368
TNFSF10	BCL2L11	0.591428	1.36154e-174	pink	1.77428
TNFSF10	DDX58	0.599024	3.3139e-180	pink	1.79707
TNFSF10	TARDBP	0.142692	7.3597e-10	pink	0.428076
TNFSF10	APP	0.133341	8.88008e-09	pink	0.400024
TNFSF10	TNFRSF21	0.116605	5.0683e-07	pink	0.349816
TNFRSF1B	PANX1	0.430195	4.87766e-84	pink	1.29059
TNFRSF1B	OTULIN	0.509693	1.28217e-122	pink	1.52908
TNFRSF1B	CYLD	0.386752	6.36542e-67	pink	1.16025
TNFRSF1B	MAP3K7	0.18708	5.31396e-16	pink	0.561239
TNFRSF1B	SQSTM1	0.477429	1.01032e-105	pink	1.43229
TNFRSF1B	STAT3	0.657966	2.04614e-229	pink	1.9739
TNFRSF1B	DIABLO	0.342353	6.5365e-52	pink	1.02706
TNFRSF1B	CFLAR	0.270796	2.17809e-32	pink	0.812389
TNFRSF1B	AXL	0.608425	2.29973e-187	pink	1.82527
TNFRSF1B	ID1	0.355125	5.47498e-56	pink	1.06538
TNFRSF1B	CDKN2A	0.183488	1.92957e-15	pink	0.550464
TNFRSF1B	HSPA4	0.413588	3.40277e-77	pink	1.24077
TNFRSF1B	BCL2	0.30048	7.90778e-40	pink	0.901441
TNFRSF1B	FLT3	-0.18166	3.68214e-15	#6495ED	0.544981
TNFRSF1B	HAT1	0.49445	2.0721e-114	pink	1.48335
TNFRSF1B	SIRT2	0.229621	1.63846e-23	pink	0.688863
TNFRSF1B	SIRT1	0.106718	4.32383e-06	pink	0.320154
TNFRSF1B	PLK1	0.188692	2.95369e-16	pink	0.566075
TNFRSF1B	MPG	0.296804	7.39206e-39	pink	0.890411
TNFRSF1B	GATA3	0.285548	5.66658e-36	pink	0.856643
TNFRSF1B	MYCN	0.150059	9.19269e-11	pink	0.450178
TNFRSF1B	ALK	0.104112	7.38242e-06	pink	0.312337
TNFRSF1B	SLC39A7	0.48788	5.35201e-111	pink	1.46364
TNFRSF1B	RNF31	0.0931449	6.12385e-05	pink	0.279435
TNFRSF1B	IDH1	0.453782	1.93719e-94	pink	1.36135
TNFRSF1B	IDH2	0.362287	2.33602e-58	pink	1.08686
TNFRSF1B	HDAC9	0.147672	1.8243e-10	pink	0.443017
TNFRSF1B	LEF1	0.422199	1.07558e-80	pink	1.2666
TNFRSF1B	CD40	0.391048	1.66847e-68	pink	1.17315
TNFRSF1B	BCL2L11	0.460831	1.03796e-97	pink	1.38249
TNFRSF1B	EGFR	0.146667	2.42682e-10	pink	0.440001
TNFRSF1B	DDX58	0.439861	3.34838e-88	pink	1.31958
TNFRSF1B	TARDBP	0.311042	1.07188e-42	pink	0.933127
TNFRSF1B	APP	0.272354	9.33267e-33	pink	0.817061
TNFRSF1B	TNFRSF21	0.350535	1.68092e-54	pink	1.0516
TRAF2	PANX1	0.118851	3.03665e-07	pink	0.356554
TRAF2	OTULIN	0.440208	2.36053e-88	pink	1.32062
TRAF2	CYLD	0.334823	1.35272e-49	pink	1.00447
TRAF2	USP22	0.66398	4.50298e-235	pink	1.99194
TRAF2	MAP3K7	0.71395	1.00304e-287	pink	2.14185
TRAF2	SQSTM1	0.424834	8.70321e-82	pink	1.2745
TRAF2	STAT3	0.236575	6.7455e-25	pink	0.709725
TRAF2	DIABLO	0.176031	2.58382e-14	pink	0.528093
TRAF2	DNMT1	0.789287	0	pink	2.36786
TRAF2	CFLAR	0.515977	3.98701e-126	pink	1.54793
TRAF2	BRAF	0.667636	1.41168e-238	pink	2.00291
TRAF2	HSPA4	0.433949	1.22345e-85	pink	1.30185
TRAF2	BCL2	-0.0921326	7.3631e-05	#6495ED	0.276398
TRAF2	STUB1	0.392436	5.09001e-69	pink	1.17731
TRAF2	FLT3	0.574027	2.78555e-162	pink	1.72208
TRAF2	HAT1	0.188535	3.12753e-16	pink	0.565606
TRAF2	SIRT2	0.105861	5.16234e-06	pink	0.317584
TRAF2	SIRT1	0.554137	4.38124e-149	pink	1.66241
TRAF2	PLK1	0.405271	6.56142e-74	pink	1.21581
TRAF2	MPG	0.271281	1.6743e-32	pink	0.813842
TRAF2	BACH2	0.581327	2.3475e-167	pink	1.74398
TRAF2	ATRX	0.396577	1.42126e-70	pink	1.18973
TRAF2	SLC39A7	0.360532	9.01718e-58	pink	1.08159
TRAF2	SPATA2	0.456288	1.35875e-95	pink	1.36886
TRAF2	RNF31	0.640248	1.75171e-213	pink	1.92075
TRAF2	IDH1	0.128227	3.23196e-08	pink	0.384681
TRAF2	KLF9	0.531219	6.05403e-135	pink	1.59366
TRAF2	HDAC9	0.174815	3.90368e-14	pink	0.524444
TRAF2	HSP90AA1	0.437397	3.97296e-87	pink	1.31219
TRAF2	BNIP3	0.291044	2.2968e-37	pink	0.873132
TRAF2	CD40	0.456898	7.08652e-96	pink	1.3707
TRAF2	DDX58	0.10693	4.13771e-06	pink	0.320789
TRAF2	TARDBP	0.664172	2.95808e-235	pink	1.99252
TRAF2	APP	0.11591	5.92765e-07	pink	0.347731
PANX1	OTULIN	0.67962	2.0167e-250	pink	2.03886
PANX1	CYLD	0.456038	1.77219e-95	pink	1.36811
PANX1	USP22	0.515529	7.13543e-126	pink	1.54659
PANX1	MAP3K7	0.457762	2.81518e-96	pink	1.37329
PANX1	SQSTM1	0.547868	4.15807e-145	pink	1.6436
PANX1	STAT3	0.712207	1.06523e-285	pink	2.13662
PANX1	DIABLO	0.717215	1.45806e-291	pink	2.15165
PANX1	DNMT1	0.249643	1.26447e-27	pink	0.748929
PANX1	CFLAR	0.0979019	2.51286e-05	pink	0.293706
PANX1	BRAF	0.312818	3.43769e-43	pink	0.938454
PANX1	AXL	0.501363	4.41886e-118	pink	1.50409
PANX1	ID1	0.419346	1.59431e-79	pink	1.25804
PANX1	CDKN2A	0.255051	8.42383e-29	pink	0.765153
PANX1	HSPA4	0.629951	1.06961e-204	pink	1.88985
PANX1	BCL2	0.482424	3.2037e-108	pink	1.44727
PANX1	STUB1	0.282249	3.75004e-35	pink	0.846747
PANX1	FLT3	-0.146739	2.37801e-10	#6495ED	0.440217
PANX1	HAT1	0.696842	1.79199e-268	pink	2.09053
PANX1	SIRT2	0.339737	4.23921e-51	pink	1.01921
PANX1	SIRT1	0.479296	1.18963e-106	pink	1.43789
PANX1	PLK1	0.389384	6.88408e-68	pink	1.16815
PANX1	MPG	0.516137	3.24e-126	pink	1.54841
PANX1	BACH2	0.435085	3.97292e-86	pink	1.30525
PANX1	GATA3	0.180944	4.73579e-15	pink	0.542831
PANX1	MYCN	0.478952	1.76523e-106	pink	1.43686
PANX1	ALK	0.419407	1.50499e-79	pink	1.25822
PANX1	ATRX	0.546762	2.05203e-144	pink	1.64029
PANX1	SLC39A7	0.682459	2.59979e-253	pink	2.04738
PANX1	SPATA2	0.216391	5.3246e-21	pink	0.649172
PANX1	RNF31	0.174552	4.26578e-14	pink	0.523656
PANX1	IDH1	0.67812	6.57877e-249	pink	2.03436
PANX1	IDH2	0.581764	1.15551e-167	pink	1.74529
PANX1	KLF9	0.26419	7.46507e-31	pink	0.792569
PANX1	HDAC9	0.632061	1.80378e-206	pink	1.89618
PANX1	LEF1	0.347183	1.97573e-53	pink	1.04155
PANX1	BNIP3	0.267399	1.35782e-31	pink	0.802196
PANX1	CD40	0.0920481	7.47659e-05	pink	0.276144
PANX1	BCL2L11	0.535799	1.10379e-137	pink	1.6074
PANX1	EGFR	0.230362	1.17224e-23	pink	0.691086
PANX1	DDX58	0.428581	2.34711e-83	pink	1.28574
PANX1	TARDBP	0.561644	5.83491e-154	pink	1.68493
PANX1	APP	0.710011	3.61351e-283	pink	2.13003
PANX1	TNFRSF21	0.600476	2.69276e-181	pink	1.80143
OTULIN	CYLD	0.550457	9.70068e-147	pink	1.65137
OTULIN	USP22	0.536659	3.33952e-138	pink	1.60998
OTULIN	MAP3K7	0.67965	1.88038e-250	pink	2.03895
OTULIN	SQSTM1	0.679171	5.72995e-250	pink	2.03751
OTULIN	STAT3	0.790493	0	pink	2.37148
OTULIN	DIABLO	0.614378	5.03896e-192	pink	1.84313
OTULIN	DNMT1	0.532583	9.34199e-136	pink	1.59775
OTULIN	CFLAR	0.459957	2.66741e-97	pink	1.37987
OTULIN	BRAF	0.505	4.78287e-120	pink	1.515
OTULIN	AXL	0.478763	2.19398e-106	pink	1.43629
OTULIN	ID1	0.260357	5.54195e-30	pink	0.781072
OTULIN	CDKN2A	0.28415	1.26586e-35	pink	0.852451
OTULIN	HSPA4	0.749875	0	pink	2.24963
OTULIN	BCL2	0.348313	8.63588e-54	pink	1.04494
OTULIN	STUB1	0.206578	3.06028e-19	pink	0.619734
OTULIN	FLT3	0.139924	1.565e-09	pink	0.419773
OTULIN	HAT1	0.730818	3.76317e-308	pink	2.19245
OTULIN	SIRT2	0.303145	1.53312e-40	pink	0.909436
OTULIN	SIRT1	0.546082	5.45717e-144	pink	1.63824
OTULIN	PLK1	0.556647	1.05995e-150	pink	1.66994
OTULIN	MPG	0.456429	1.16865e-95	pink	1.36929
OTULIN	BACH2	0.56101	1.52407e-153	pink	1.68303
OTULIN	GATA3	0.271781	1.2756e-32	pink	0.815342
OTULIN	MYCN	0.27538	1.7692e-33	pink	0.826139
OTULIN	ALK	0.243405	2.65385e-26	pink	0.730216
OTULIN	ATRX	0.597117	8.78525e-179	pink	1.79135
OTULIN	SLC39A7	0.691246	1.81341e-262	pink	2.07374
OTULIN	SPATA2	0.299395	1.53486e-39	pink	0.898185
OTULIN	RNF31	0.38444	4.41316e-66	pink	1.15332
OTULIN	IDH1	0.656041	1.24289e-227	pink	1.96812
OTULIN	IDH2	0.446796	2.84232e-91	pink	1.34039
OTULIN	KLF9	0.418951	2.31109e-79	pink	1.25685
OTULIN	HDAC9	0.527337	1.17768e-132	pink	1.58201
OTULIN	HSP90AA1	0.302918	1.76465e-40	pink	0.908754
OTULIN	LEF1	0.473124	1.333e-103	pink	1.41937
OTULIN	BNIP3	0.325595	7.62443e-47	pink	0.976784
OTULIN	CD40	0.434243	9.1421e-86	pink	1.30273
OTULIN	BCL2L11	0.524521	5.16198e-131	pink	1.57356
OTULIN	EGFR	0.280993	7.65007e-35	pink	0.842979
OTULIN	DDX58	0.461927	3.16644e-98	pink	1.38578
OTULIN	TARDBP	0.741299	1.21540148876947e-321	pink	2.2239
OTULIN	APP	0.51408	4.64972e-125	pink	1.54224
OTULIN	TNFRSF21	0.449809	1.25074e-92	pink	1.34943
CYLD	USP22	0.482365	3.42999e-108	pink	1.4471
CYLD	MAP3K7	0.55888	3.7634e-152	pink	1.67664
CYLD	SQSTM1	0.458229	1.7081e-96	pink	1.37469
CYLD	STAT3	0.478062	4.89779e-106	pink	1.43419
CYLD	DIABLO	0.222677	3.57235e-22	pink	0.668031
CYLD	DNMT1	0.273629	4.64194e-33	pink	0.820887
CYLD	CFLAR	0.515243	1.03317e-125	pink	1.54573
CYLD	BRAF	0.592745	1.48274e-175	pink	1.77824
CYLD	AXL	0.331966	9.83939e-49	pink	0.995898
CYLD	HSPA4	0.498488	1.52256e-116	pink	1.49546
CYLD	BCL2	0.308828	4.3784e-42	pink	0.926483
CYLD	STUB1	0.194162	3.87032e-17	pink	0.582486
CYLD	FLT3	0.214377	1.24317e-20	pink	0.643131
CYLD	HAT1	0.297811	4.0213e-39	pink	0.893432
CYLD	SIRT2	0.173324	6.44726e-14	pink	0.519972
CYLD	SIRT1	0.432019	8.18672e-85	pink	1.29606
CYLD	MPG	0.142285	8.23034e-10	pink	0.426855
CYLD	BACH2	0.363594	8.50072e-59	pink	1.09078
CYLD	GATA3	0.136349	4.05889e-09	pink	0.409047
CYLD	ALK	0.205704	4.34837e-19	pink	0.617111
CYLD	ATRX	0.464734	1.48459e-99	pink	1.3942
CYLD	SLC39A7	0.310533	1.48291e-42	pink	0.9316
CYLD	SPATA2	0.501556	3.47876e-118	pink	1.50467
CYLD	RNF31	0.297109	6.14829e-39	pink	0.891327
CYLD	IDH1	0.169976	1.95772e-13	pink	0.509928
CYLD	IDH2	0.138651	2.20389e-09	pink	0.415952
CYLD	KLF9	0.378171	7.80132e-64	pink	1.13451
CYLD	HDAC9	0.367611	3.69137e-60	pink	1.10283
CYLD	HSP90AA1	0.34329	3.33184e-52	pink	1.02987
CYLD	LEF1	0.219784	1.25177e-21	pink	0.659351
CYLD	BNIP3	0.338902	7.66537e-51	pink	1.01671
CYLD	CD40	0.458134	1.89161e-96	pink	1.3744
CYLD	BCL2L11	0.367739	3.3387e-60	pink	1.10322
CYLD	DDX58	0.451421	2.32005e-93	pink	1.35426
CYLD	TARDBP	0.571442	1.6271e-160	pink	1.71433
CYLD	APP	0.486633	2.32943e-110	pink	1.4599
CYLD	TNFRSF21	0.216068	6.10334e-21	pink	0.648204
USP22	MAP3K7	0.778667	0	pink	2.336
USP22	SQSTM1	0.466298	2.66592e-100	pink	1.39889
USP22	STAT3	0.39775	5.10777e-71	pink	1.19325
USP22	DIABLO	0.435161	3.68254e-86	pink	1.30548
USP22	DNMT1	0.727606	3.8284e-304	pink	2.18282
USP22	CFLAR	0.399948	7.43083e-72	pink	1.19984
USP22	BRAF	0.826852	0	pink	2.48055
USP22	AXL	0.103556	8.26201e-06	pink	0.310669
USP22	ID1	0.0946365	4.65202e-05	pink	0.283909
USP22	HSPA4	0.453249	3.39775e-94	pink	1.35975
USP22	BCL2	0.203529	1.03469e-18	pink	0.610586
USP22	STUB1	0.534984	3.41563e-137	pink	1.60495
USP22	FLT3	0.510269	6.15578e-123	pink	1.53081
USP22	HAT1	0.354421	9.29048e-56	pink	1.06326
USP22	SIRT2	0.195128	2.68646e-17	pink	0.585383
USP22	SIRT1	0.700695	1.09214e-272	pink	2.10208
USP22	PLK1	0.34186	9.31022e-52	pink	1.02558
USP22	MPG	0.4119	1.60772e-76	pink	1.2357
USP22	BACH2	0.738053	2.14559172590157e-317	pink	2.21416
USP22	MYCN	0.253192	2.15277e-28	pink	0.759577
USP22	ALK	0.187746	4.17171e-16	pink	0.563237
USP22	ATRX	0.707323	4.20904e-280	pink	2.12197
USP22	SLC39A7	0.458572	1.18198e-96	pink	1.37572
USP22	SPATA2	0.565314	2.17018e-156	pink	1.69594
USP22	RNF31	0.603621	1.12109e-183	pink	1.81086
USP22	IDH1	0.307592	9.54914e-42	pink	0.922777
USP22	IDH2	0.208276	1.54019e-19	pink	0.624828
USP22	KLF9	0.630859	1.85436e-205	pink	1.89258
USP22	HDAC9	0.516475	2.08902e-126	pink	1.54942
USP22	HSP90AA1	0.247207	4.19409e-27	pink	0.741621
USP22	BNIP3	0.453716	2.0774e-94	pink	1.36115
USP22	CD40	0.269053	5.58943e-32	pink	0.807158
USP22	BCL2L11	0.215083	9.24241e-21	pink	0.64525
USP22	DDX58	0.163237	1.71188e-12	pink	0.489712
USP22	TARDBP	0.745417	0	pink	2.23625
USP22	APP	0.493949	3.79596e-114	pink	1.48185
USP22	TNFRSF21	0.291313	1.95952e-37	pink	0.87394
MAP3K7	SQSTM1	0.534758	4.66794e-137	pink	1.60427
MAP3K7	STAT3	0.535553	1.55247e-137	pink	1.60666
MAP3K7	DIABLO	0.485274	1.15127e-109	pink	1.45582
MAP3K7	DNMT1	0.754668	0	pink	2.264
MAP3K7	CFLAR	0.520075	1.87686e-128	pink	1.56023
MAP3K7	BRAF	0.786002	0	pink	2.35801
MAP3K7	AXL	0.184052	1.57841e-15	pink	0.552157
MAP3K7	ID1	0.12965	2.26753e-08	pink	0.388949
MAP3K7	CDKN2A	0.139812	1.61301e-09	pink	0.419437
MAP3K7	HSPA4	0.57913	8.15931e-166	pink	1.73739
MAP3K7	BCL2	0.221085	7.13643e-22	pink	0.663256
MAP3K7	STUB1	0.355857	3.15611e-56	pink	1.06757
MAP3K7	FLT3	0.492429	2.36565e-113	pink	1.47729
MAP3K7	HAT1	0.483967	5.30952e-109	pink	1.4519
MAP3K7	SIRT2	0.276484	9.59256e-34	pink	0.829452
MAP3K7	SIRT1	0.77033	0	pink	2.31099
MAP3K7	PLK1	0.42129	2.54653e-80	pink	1.26387
MAP3K7	MPG	0.359475	2.0252e-57	pink	1.07842
MAP3K7	BACH2	0.751542	0	pink	2.25463
MAP3K7	GATA3	0.109152	2.59379e-06	pink	0.327457
MAP3K7	MYCN	0.223543	2.44588e-22	pink	0.670629
MAP3K7	ALK	0.126296	5.19575e-08	pink	0.378889
MAP3K7	ATRX	0.640426	1.22848e-213	pink	1.92128
MAP3K7	SLC39A7	0.56744	8.223e-158	pink	1.70232
MAP3K7	SPATA2	0.507926	1.20567e-121	pink	1.52378
MAP3K7	RNF31	0.631583	4.56233e-206	pink	1.89475
MAP3K7	IDH1	0.379411	2.82757e-64	pink	1.13823
MAP3K7	IDH2	0.212093	3.21894e-20	pink	0.636278
MAP3K7	KLF9	0.62402	8.72499e-200	pink	1.87206
MAP3K7	HDAC9	0.472032	4.55096e-103	pink	1.4161
MAP3K7	HSP90AA1	0.338052	1.39955e-50	pink	1.01416
MAP3K7	LEF1	0.173817	5.46415e-14	pink	0.521451
MAP3K7	BNIP3	0.418411	3.83789e-79	pink	1.25523
MAP3K7	CD40	0.380955	7.94511e-65	pink	1.14287
MAP3K7	BCL2L11	0.320775	1.91228e-45	pink	0.962325
MAP3K7	EGFR	0.119243	2.77421e-07	pink	0.35773
MAP3K7	DDX58	0.30434	7.30866e-41	pink	0.913019
MAP3K7	TARDBP	0.849328	0	pink	2.54798
MAP3K7	APP	0.440323	2.10091e-88	pink	1.32097
MAP3K7	TNFRSF21	0.348362	8.33139e-54	pink	1.04509
SQSTM1	STAT3	0.707008	9.57925e-280	pink	2.12102
SQSTM1	DIABLO	0.586085	9.86192e-171	pink	1.75825
SQSTM1	DNMT1	0.436152	1.37623e-86	pink	1.30846
SQSTM1	CFLAR	0.353337	2.09273e-55	pink	1.06001
SQSTM1	BRAF	0.385873	1.33171e-66	pink	1.15762
SQSTM1	AXL	0.499205	6.31669e-117	pink	1.49761
SQSTM1	ID1	0.310372	1.6435e-42	pink	0.931115
SQSTM1	CDKN2A	0.285715	5.14526e-36	pink	0.857145
SQSTM1	HSPA4	0.658878	2.897e-230	pink	1.97663
SQSTM1	BCL2	0.331787	1.11313e-48	pink	0.995362
SQSTM1	STUB1	0.434361	8.13953e-86	pink	1.30308
SQSTM1	FLT3	0.128881	2.74752e-08	pink	0.386642
SQSTM1	HAT1	0.651598	1.44849e-223	pink	1.95479
SQSTM1	SIRT2	0.198712	6.81533e-18	pink	0.596135
SQSTM1	SIRT1	0.420874	3.77474e-80	pink	1.26262
SQSTM1	PLK1	0.36236	2.20919e-58	pink	1.08708
SQSTM1	MPG	0.540474	1.59582e-140	pink	1.62142
SQSTM1	BACH2	0.362284	2.34145e-58	pink	1.08685
SQSTM1	GATA3	0.228795	2.37682e-23	pink	0.686385
SQSTM1	MYCN	0.205432	4.84846e-19	pink	0.616296
SQSTM1	ALK	0.288639	9.42322e-37	pink	0.865916
SQSTM1	ATRX	0.397294	7.60646e-71	pink	1.19188
SQSTM1	SLC39A7	0.707213	5.61139e-280	pink	2.12164
SQSTM1	SPATA2	0.359047	2.8075e-57	pink	1.07714
SQSTM1	RNF31	0.428738	2.01395e-83	pink	1.28622
SQSTM1	IDH1	0.513063	1.72327e-124	pink	1.53919
SQSTM1	IDH2	0.452236	9.86689e-94	pink	1.35671
SQSTM1	KLF9	0.464111	2.93446e-99	pink	1.39233
SQSTM1	HDAC9	0.368556	1.75281e-60	pink	1.10567
SQSTM1	HSP90AA1	0.229223	1.96103e-23	pink	0.687668
SQSTM1	LEF1	0.38942	6.67372e-68	pink	1.16826
SQSTM1	BNIP3	0.343584	2.69595e-52	pink	1.03075
SQSTM1	CD40	0.381634	4.53746e-65	pink	1.1449
SQSTM1	BCL2L11	0.353216	2.28955e-55	pink	1.05965
SQSTM1	EGFR	0.24408	1.9171e-26	pink	0.732241
SQSTM1	DDX58	0.440598	1.59276e-88	pink	1.32179
SQSTM1	TARDBP	0.61234	2.0334e-190	pink	1.83702
SQSTM1	APP	0.504251	1.22036e-119	pink	1.51275
SQSTM1	TNFRSF21	0.354948	6.25262e-56	pink	1.06485
STAT3	DIABLO	0.667737	1.12748e-238	pink	2.00321
STAT3	DNMT1	0.367879	2.98927e-60	pink	1.10364
STAT3	CFLAR	0.327949	1.54619e-47	pink	0.983848
STAT3	BRAF	0.289319	6.33163e-37	pink	0.867956
STAT3	AXL	0.669755	1.24654e-240	pink	2.00926
STAT3	ID1	0.409258	1.79516e-75	pink	1.22777
STAT3	CDKN2A	0.281594	5.44153e-35	pink	0.844782
STAT3	HSPA4	0.700641	1.25077e-272	pink	2.10192
STAT3	BCL2	0.504871	5.62383e-120	pink	1.51461
STAT3	STUB1	0.176601	2.12736e-14	pink	0.529803
STAT3	HAT1	0.821436	0	pink	2.46431
STAT3	SIRT2	0.301909	3.28925e-40	pink	0.905726
STAT3	SIRT1	0.418061	5.32337e-79	pink	1.25418
STAT3	PLK1	0.464215	2.62002e-99	pink	1.39265
STAT3	MPG	0.498595	1.33455e-116	pink	1.49579
STAT3	BACH2	0.430816	2.66107e-84	pink	1.29245
STAT3	GATA3	0.273499	4.98663e-33	pink	0.820496
STAT3	MYCN	0.309411	3.02648e-42	pink	0.928232
STAT3	ALK	0.32034	2.54978e-45	pink	0.961021
STAT3	ATRX	0.433462	1.97753e-85	pink	1.30039
STAT3	TERT	0.14309	6.59489e-10	pink	0.42927
STAT3	SLC39A7	0.786657	0	pink	2.35997
STAT3	SPATA2	0.228675	2.50878e-23	pink	0.686025
STAT3	RNF31	0.316199	3.85955e-44	pink	0.948598
STAT3	IDH1	0.739514	2.67398208842199e-319	pink	2.21854
STAT3	IDH2	0.598979	3.58491e-180	pink	1.79694
STAT3	KLF9	0.367883	2.97994e-60	pink	1.10365
STAT3	HDAC9	0.453816	1.86908e-94	pink	1.36145
STAT3	HSP90AA1	0.161425	3.02096e-12	pink	0.484275
STAT3	LEF1	0.518379	1.74135e-127	pink	1.55514
STAT3	BNIP3	0.25821	1.67952e-29	pink	0.774631
STAT3	CD40	0.348795	6.06408e-54	pink	1.04638
STAT3	BCL2L11	0.599163	2.60741e-180	pink	1.79749
STAT3	EGFR	0.379079	3.71041e-64	pink	1.13724
STAT3	DDX58	0.558693	4.98691e-152	pink	1.67608
STAT3	TARDBP	0.667945	7.09241e-239	pink	2.00384
STAT3	APP	0.569033	6.97488e-159	pink	1.7071
STAT3	TNFRSF21	0.531369	4.93294e-135	pink	1.59411
DIABLO	DNMT1	0.334247	2.0217e-49	pink	1.00274
DIABLO	BRAF	0.216979	4.1503e-21	pink	0.650936
DIABLO	AXL	0.45272	5.93256e-94	pink	1.35816
DIABLO	ID1	0.505125	4.08958e-120	pink	1.51538
DIABLO	CDKN2A	0.306322	2.12024e-41	pink	0.918967
DIABLO	HSPA4	0.607719	8.08578e-187	pink	1.82316
DIABLO	BCL2	0.469387	8.73994e-102	pink	1.40816
DIABLO	STUB1	0.486835	1.83601e-110	pink	1.46051
DIABLO	FLT3	-0.0990854	2.00054e-05	#6495ED	0.297256
DIABLO	HAT1	0.827763	0	pink	2.48329
DIABLO	SIRT2	0.421484	2.11777e-80	pink	1.26445
DIABLO	SIRT1	0.500003	2.36735e-117	pink	1.50001
DIABLO	PLK1	0.456418	1.18233e-95	pink	1.36925
DIABLO	MPG	0.736941	5.92564272581979e-316	pink	2.21082
DIABLO	BACH2	0.41541	6.30854e-78	pink	1.24623
DIABLO	GATA3	0.172308	9.05249e-14	pink	0.516924
DIABLO	MYCN	0.503639	2.61894e-119	pink	1.51092
DIABLO	ALK	0.367535	3.91749e-60	pink	1.10261
DIABLO	ATRX	0.435933	1.71039e-86	pink	1.3078
DIABLO	TERT	0.103644	8.11631e-06	pink	0.310933
DIABLO	SLC39A7	0.795181	0	pink	2.38554
DIABLO	SPATA2	0.200955	2.84935e-18	pink	0.602866
DIABLO	RNF31	0.338234	1.23072e-50	pink	1.0147
DIABLO	IDH1	0.747966	0	pink	2.2439
DIABLO	IDH2	0.721917	3.48512e-297	pink	2.16575
DIABLO	KLF9	0.328743	9.00371e-48	pink	0.986228
DIABLO	HDAC9	0.530288	2.15677e-134	pink	1.59086
DIABLO	LEF1	0.370273	4.50303e-61	pink	1.11082
DIABLO	BNIP3	0.25933	9.43112e-30	pink	0.777991
DIABLO	BCL2L11	0.52425	7.41642e-131	pink	1.57275
DIABLO	EGFR	0.291912	1.37565e-37	pink	0.875735
DIABLO	DDX58	0.39093	1.8454e-68	pink	1.17279
DIABLO	TARDBP	0.566205	5.52535e-157	pink	1.69861
DIABLO	APP	0.601082	9.41682e-182	pink	1.80325
DIABLO	TNFRSF21	0.621233	1.62898e-197	pink	1.8637
DNMT1	CFLAR	0.550537	8.63361e-147	pink	1.65161
DNMT1	BRAF	0.684903	7.96669e-256	pink	2.05471
DNMT1	CDKN2A	0.196854	1.39233e-17	pink	0.590561
DNMT1	HSPA4	0.399906	7.71014e-72	pink	1.19972
DNMT1	STUB1	0.379542	2.53946e-64	pink	1.13863
DNMT1	FLT3	0.645418	5.06604e-218	pink	1.93625
DNMT1	HAT1	0.362504	1.97635e-58	pink	1.08751
DNMT1	SIRT2	0.138553	2.26243e-09	pink	0.415658
DNMT1	SIRT1	0.590953	3.02003e-174	pink	1.77286
DNMT1	PLK1	0.573567	5.76259e-162	pink	1.7207
DNMT1	MPG	0.362448	2.06353e-58	pink	1.08734
DNMT1	BACH2	0.688667	9.55788e-260	pink	2.066
DNMT1	MYCN	0.16792	3.83033e-13	pink	0.50376
DNMT1	ATRX	0.504808	6.08455e-120	pink	1.51442
DNMT1	SLC39A7	0.494963	1.11421e-114	pink	1.48489
DNMT1	SPATA2	0.291696	1.56319e-37	pink	0.875087
DNMT1	RNF31	0.789508	0	pink	2.36852
DNMT1	IDH1	0.336362	4.60218e-50	pink	1.00909
DNMT1	IDH2	0.0929914	6.29821e-05	pink	0.278974
DNMT1	KLF9	0.559728	1.05342e-152	pink	1.67918
DNMT1	HDAC9	0.321014	1.63185e-45	pink	0.963043
DNMT1	HSP90AA1	0.185758	8.56519e-16	pink	0.557275
DNMT1	LEF1	0.127424	3.94099e-08	pink	0.382271
DNMT1	BNIP3	0.273089	6.24233e-33	pink	0.819267
DNMT1	CD40	0.462523	1.65718e-98	pink	1.38757
DNMT1	BCL2L11	0.157466	1.02158e-11	pink	0.472397
DNMT1	EGFR	0.186939	5.59073e-16	pink	0.560818
DNMT1	DDX58	0.221314	6.46283e-22	pink	0.663942
DNMT1	TARDBP	0.718634	3.01847e-293	pink	2.1559
DNMT1	APP	0.154935	2.19031e-11	pink	0.464805
DNMT1	TNFRSF21	0.13444	6.68435e-09	pink	0.403321
CFLAR	BRAF	0.550853	5.44182e-147	pink	1.65256
CFLAR	HSPA4	0.268851	6.23162e-32	pink	0.806552
CFLAR	STUB1	0.0989823	2.04088e-05	pink	0.296947
CFLAR	FLT3	0.539109	1.08758e-139	pink	1.61733
CFLAR	HAT1	0.15399	2.90239e-11	pink	0.461971
CFLAR	SIRT1	0.366069	1.23677e-59	pink	1.09821
CFLAR	PLK1	0.193563	4.84858e-17	pink	0.58069
CFLAR	MPG	0.104545	6.76079e-06	pink	0.313635
CFLAR	BACH2	0.426374	1.98185e-82	pink	1.27912
CFLAR	GATA3	0.103337	8.63483e-06	pink	0.310012
CFLAR	MYCN	-0.0927785	6.54771e-05	#6495ED	0.278335
CFLAR	ATRX	0.334266	1.99458e-49	pink	1.0028
CFLAR	SLC39A7	0.210659	5.81734e-20	pink	0.631976
CFLAR	SPATA2	0.24057	1.02945e-25	pink	0.721709
CFLAR	RNF31	0.532368	1.25585e-135	pink	1.5971
CFLAR	IDH2	-0.0990624	2.00947e-05	#6495ED	0.297187
CFLAR	KLF9	0.40938	1.60656e-75	pink	1.22814
CFLAR	HDAC9	0.128692	2.87955e-08	pink	0.386076
CFLAR	HSP90AA1	0.177501	1.56303e-14	pink	0.532503
CFLAR	LEF1	0.232033	5.48275e-24	pink	0.6961
CFLAR	BNIP3	0.222549	3.77815e-22	pink	0.667646
CFLAR	CD40	0.808304	0	pink	2.42491
CFLAR	BCL2L11	0.412887	6.49622e-77	pink	1.23866
CFLAR	DDX58	0.393808	1.56388e-69	pink	1.18142
CFLAR	TARDBP	0.471666	6.86414e-103	pink	1.415
BRAF	HSPA4	0.405611	4.8395e-74	pink	1.21683
BRAF	STUB1	0.37489	1.11847e-62	pink	1.12467
BRAF	FLT3	0.636425	3.50914e-210	pink	1.90927
BRAF	HAT1	0.189402	2.27637e-16	pink	0.568206
BRAF	SIRT1	0.692348	1.22045e-263	pink	2.07705
BRAF	PLK1	0.223648	2.33557e-22	pink	0.670945
BRAF	MPG	0.197594	1.04846e-17	pink	0.592781
BRAF	BACH2	0.695764	2.63785e-267	pink	2.08729
BRAF	ATRX	0.706486	3.72967e-279	pink	2.11946
BRAF	SLC39A7	0.265847	3.10429e-31	pink	0.797542
BRAF	SPATA2	0.559897	8.16585e-153	pink	1.67969
BRAF	RNF31	0.582402	4.09932e-168	pink	1.74721
BRAF	IDH1	0.126077	5.48161e-08	pink	0.378231
BRAF	KLF9	0.662467	1.22973e-233	pink	1.9874
BRAF	HDAC9	0.440352	2.04029e-88	pink	1.32106
BRAF	HSP90AA1	0.371856	1.27741e-61	pink	1.11557
BRAF	BNIP3	0.497397	5.77947e-116	pink	1.49219
BRAF	CD40	0.384343	4.78852e-66	pink	1.15303
BRAF	BCL2L11	0.130417	1.86998e-08	pink	0.391251
BRAF	DDX58	0.198197	8.31235e-18	pink	0.594592
BRAF	TARDBP	0.689982	3.94576e-261	pink	2.06995
BRAF	APP	0.363885	6.78367e-59	pink	1.09165
BRAF	TNFRSF21	0.0965545	3.24755e-05	pink	0.289663
AXL	ID1	0.336171	5.26171e-50	pink	1.00851
AXL	CDKN2A	0.180004	6.57584e-15	pink	0.540012
AXL	HSPA4	0.425559	4.34115e-82	pink	1.27668
AXL	BCL2	0.559807	9.35506e-153	pink	1.67942
AXL	STUB1	0.124857	7.36865e-08	pink	0.374572
AXL	FLT3	-0.253258	2.08246e-28	#6495ED	0.759775
AXL	HAT1	0.577868	6.17888e-165	pink	1.73361
AXL	SIRT2	0.209419	9.66979e-20	pink	0.628256
AXL	SIRT1	0.16476	1.0569e-12	pink	0.494281
AXL	PLK1	0.176171	2.46392e-14	pink	0.528512
AXL	MPG	0.404224	1.67553e-73	pink	1.21267
AXL	BACH2	0.103534	8.29961e-06	pink	0.310601
AXL	GATA3	0.219969	1.15551e-21	pink	0.659908
AXL	MYCN	0.201412	2.38252e-18	pink	0.604237
AXL	ALK	0.257222	2.78873e-29	pink	0.771665
AXL	ATRX	0.14633	2.66931e-10	pink	0.43899
AXL	SLC39A7	0.538952	1.35681e-139	pink	1.61686
AXL	SPATA2	0.152867	4.04675e-11	pink	0.458602
AXL	RNF31	0.10154	1.23661e-05	pink	0.304621
AXL	IDH1	0.501273	4.93853e-118	pink	1.50382
AXL	IDH2	0.597491	4.62983e-179	pink	1.79247
AXL	KLF9	0.235996	8.83421e-25	pink	0.707987
AXL	HDAC9	0.221928	4.94986e-22	pink	0.665785
AXL	LEF1	0.390244	3.31195e-68	pink	1.17073
AXL	CD40	0.183402	1.98927e-15	pink	0.550207
AXL	BCL2L11	0.477119	1.43844e-105	pink	1.43136
AXL	EGFR	0.235312	1.2135e-24	pink	0.705936
AXL	DDX58	0.46576	4.81742e-100	pink	1.39728
AXL	TARDBP	0.32478	1.32031e-46	pink	0.974339
AXL	APP	0.389188	8.13093e-68	pink	1.16756
AXL	TNFRSF21	0.390452	2.77443e-68	pink	1.17136
ID1	CDKN2A	0.210158	7.14493e-20	pink	0.630474
ID1	HSPA4	0.248581	2.13569e-27	pink	0.745744
ID1	BCL2	0.272253	9.85807e-33	pink	0.81676
ID1	STUB1	0.222167	4.46121e-22	pink	0.666502
ID1	FLT3	-0.204267	7.71692e-19	#6495ED	0.612802
ID1	HAT1	0.412209	1.21138e-76	pink	1.23663
ID1	SIRT2	0.283684	1.65339e-35	pink	0.851052
ID1	SIRT1	0.275515	1.6418e-33	pink	0.826544
ID1	PLK1	0.116654	5.01254e-07	pink	0.349963
ID1	MPG	0.45593	1.98839e-95	pink	1.36779
ID1	BACH2	0.112669	1.21589e-06	pink	0.338008
ID1	MYCN	0.415899	4.00471e-78	pink	1.2477
ID1	ALK	0.166001	7.11209e-13	pink	0.498003
ID1	SLC39A7	0.474867	1.86211e-104	pink	1.4246
ID1	RNF31	0.18787	3.98745e-16	pink	0.563609
ID1	IDH1	0.389285	7.48843e-68	pink	1.16785
ID1	IDH2	0.397024	9.63008e-71	pink	1.19107
ID1	HDAC9	0.156254	1.4742e-11	pink	0.468762
ID1	LEF1	0.156633	1.31479e-11	pink	0.469899
ID1	BCL2L11	0.341882	9.1653e-52	pink	1.02565
ID1	EGFR	0.103025	9.19444e-06	pink	0.309076
ID1	DDX58	0.258176	1.70913e-29	pink	0.774529
ID1	TARDBP	0.233657	2.60568e-24	pink	0.70097
ID1	APP	0.297898	3.81317e-39	pink	0.893695
ID1	TNFRSF21	0.450738	4.74143e-93	pink	1.35221
CDKN2A	HSPA4	0.279619	1.66117e-34	pink	0.838858
CDKN2A	FLT3	-0.0906634	9.58914e-05	#6495ED	0.27199
CDKN2A	HAT1	0.385944	1.25419e-66	pink	1.15783
CDKN2A	SIRT2	0.144467	4.50179e-10	pink	0.4334
CDKN2A	PLK1	0.406359	2.46893e-74	pink	1.21908
CDKN2A	MPG	0.272029	1.11404e-32	pink	0.816087
CDKN2A	BACH2	0.107669	3.54617e-06	pink	0.323006
CDKN2A	GATA3	0.247673	3.33821e-27	pink	0.743018
CDKN2A	MYCN	0.239827	1.46422e-25	pink	0.71948
CDKN2A	TERT	0.103516	8.33004e-06	pink	0.310547
CDKN2A	SLC39A7	0.361736	3.5727e-58	pink	1.08521
CDKN2A	RNF31	0.150205	8.81374e-11	pink	0.450614
CDKN2A	IDH1	0.304261	7.67507e-41	pink	0.912783
CDKN2A	IDH2	0.320353	2.52933e-45	pink	0.961058
CDKN2A	HDAC9	0.213421	1.85366e-20	pink	0.640263
CDKN2A	LEF1	0.244376	1.66231e-26	pink	0.733127
CDKN2A	BNIP3	0.17706	1.81814e-14	pink	0.531181
CDKN2A	BCL2L11	0.192496	7.23287e-17	pink	0.577489
CDKN2A	DDX58	0.1684	3.27672e-13	pink	0.505201
CDKN2A	TARDBP	0.199812	4.44876e-18	pink	0.599437
CDKN2A	APP	0.165846	7.4727e-13	pink	0.497539
CDKN2A	TNFRSF21	0.157103	1.14047e-11	pink	0.471309
HSPA4	BCL2	0.325975	5.89742e-47	pink	0.977926
HSPA4	STUB1	0.325091	1.07036e-46	pink	0.975274
HSPA4	HAT1	0.700747	9.55998e-273	pink	2.10224
HSPA4	SIRT2	0.222574	3.73596e-22	pink	0.667723
HSPA4	SIRT1	0.402709	6.46079e-73	pink	1.20813
HSPA4	PLK1	0.530991	8.26745e-135	pink	1.59297
HSPA4	MPG	0.472271	3.47891e-103	pink	1.41681
HSPA4	BACH2	0.403948	2.14417e-73	pink	1.21184
HSPA4	GATA3	0.274826	2.4021e-33	pink	0.824478
HSPA4	MYCN	0.262918	1.45706e-30	pink	0.788755
HSPA4	ALK	0.297897	3.81688e-39	pink	0.89369
HSPA4	ATRX	0.452553	7.0742e-94	pink	1.35766
HSPA4	TERT	0.114641	7.87158e-07	pink	0.343924
HSPA4	SLC39A7	0.695687	3.19793e-267	pink	2.08706
HSPA4	SPATA2	0.323128	3.99631e-46	pink	0.969383
HSPA4	RNF31	0.299053	1.89074e-39	pink	0.897159
HSPA4	IDH1	0.614743	2.58979e-192	pink	1.84423
HSPA4	IDH2	0.471494	8.32086e-103	pink	1.41448
HSPA4	KLF9	0.306707	1.66578e-41	pink	0.920121
HSPA4	HDAC9	0.466371	2.4602e-100	pink	1.39911
HSPA4	HSP90AA1	0.510232	6.4591e-123	pink	1.53069
HSPA4	LEF1	0.478228	4.05188e-106	pink	1.43468
HSPA4	BNIP3	0.352784	3.16196e-55	pink	1.05835
HSPA4	CD40	0.307321	1.13274e-41	pink	0.921963
HSPA4	BCL2L11	0.44815	7.01093e-92	pink	1.34445
HSPA4	EGFR	0.294635	2.72148e-38	pink	0.883904
HSPA4	DDX58	0.433993	1.17088e-85	pink	1.30198
HSPA4	TARDBP	0.672293	4.10216e-243	pink	2.01688
HSPA4	APP	0.554814	1.61206e-149	pink	1.66444
HSPA4	TNFRSF21	0.369018	1.217e-60	pink	1.10705
BCL2	STUB1	0.155913	1.63349e-11	pink	0.467739
BCL2	FLT3	-0.277516	5.39941e-34	#6495ED	0.832548
BCL2	HAT1	0.493961	3.74015e-114	pink	1.48188
BCL2	SIRT2	0.236627	6.58328e-25	pink	0.709882
BCL2	SIRT1	0.315329	6.7956e-44	pink	0.945987
BCL2	MPG	0.27617	1.14171e-33	pink	0.828511
BCL2	BACH2	0.241628	6.21924e-26	pink	0.724884
BCL2	GATA3	0.115021	7.23257e-07	pink	0.345064
BCL2	MYCN	0.24329	2.80531e-26	pink	0.72987
BCL2	ALK	0.323388	3.35716e-46	pink	0.970165
BCL2	ATRX	0.288536	1.00086e-36	pink	0.865607
BCL2	SLC39A7	0.388163	1.93662e-67	pink	1.16449
BCL2	SPATA2	0.270872	2.09088e-32	pink	0.812615
BCL2	IDH1	0.342944	4.27506e-52	pink	1.02883
BCL2	IDH2	0.602442	8.81855e-183	pink	1.80733
BCL2	KLF9	0.240996	8.40434e-26	pink	0.722989
BCL2	HDAC9	0.310836	1.22251e-42	pink	0.932509
BCL2	LEF1	0.231789	6.13001e-24	pink	0.695366
BCL2	BNIP3	0.0926746	6.67277e-05	pink	0.278024
BCL2	CD40	-0.101433	1.26304e-05	#6495ED	0.3043
BCL2	BCL2L11	0.442492	2.33498e-89	pink	1.32748
BCL2	EGFR	0.181034	4.58772e-15	pink	0.543103
BCL2	DDX58	0.277985	4.15598e-34	pink	0.833954
BCL2	TARDBP	0.321045	1.59943e-45	pink	0.963134
BCL2	APP	0.44746	1.43126e-91	pink	1.34238
BCL2	TNFRSF21	0.398645	2.33544e-71	pink	1.19593
STUB1	FLT3	0.193524	4.9218e-17	pink	0.580571
STUB1	HAT1	0.275136	2.02379e-33	pink	0.825409
STUB1	SIRT2	0.148831	1.3098e-10	pink	0.446493
STUB1	SIRT1	0.309649	2.60112e-42	pink	0.928948
STUB1	PLK1	0.153241	3.62451e-11	pink	0.459722
STUB1	MPG	0.655942	1.53468e-227	pink	1.96783
STUB1	BACH2	0.297066	6.31051e-39	pink	0.891197
STUB1	MYCN	0.205623	4.49184e-19	pink	0.616868
STUB1	ALK	0.209496	9.37056e-20	pink	0.628487
STUB1	ATRX	0.287677	1.65115e-36	pink	0.86303
STUB1	SLC39A7	0.462173	2.4253e-98	pink	1.38652
STUB1	SPATA2	0.459761	3.29201e-97	pink	1.37928
STUB1	RNF31	0.534783	4.50952e-137	pink	1.60435
STUB1	IDH1	0.203649	9.86508e-19	pink	0.610947
STUB1	IDH2	0.319529	4.3574e-45	pink	0.958586
STUB1	KLF9	0.373296	4.03293e-62	pink	1.11989
STUB1	HDAC9	0.285929	4.54795e-36	pink	0.857786
STUB1	HSP90AA1	0.0936655	5.56615e-05	pink	0.280997
STUB1	BNIP3	0.394324	1.00164e-69	pink	1.18297
STUB1	BCL2L11	0.129691	2.24421e-08	pink	0.389073
STUB1	DDX58	0.09621	3.46578e-05	pink	0.28863
STUB1	TARDBP	0.381342	5.77444e-65	pink	1.14403
STUB1	APP	0.377867	9.99692e-64	pink	1.1336
STUB1	TNFRSF21	0.201981	1.90605e-18	pink	0.605943
FLT3	HAT1	-0.114967	7.32147e-07	#6495ED	0.3449
FLT3	SIRT1	0.41386	2.64726e-77	pink	1.24158
FLT3	BACH2	0.446066	6.03013e-91	pink	1.3382
FLT3	MYCN	-0.156128	1.53111e-11	#6495ED	0.468384
FLT3	ALK	-0.176125	2.50217e-14	#6495ED	0.528376
FLT3	ATRX	0.306451	1.95628e-41	pink	0.919353
FLT3	TERT	-0.123421	1.04012e-07	#6495ED	0.370264
FLT3	SPATA2	0.237243	4.93712e-25	pink	0.71173
FLT3	RNF31	0.586644	3.91992e-171	pink	1.75993
FLT3	IDH1	-0.137061	3.364e-09	#6495ED	0.411183
FLT3	IDH2	-0.315689	5.37743e-44	#6495ED	0.947068
FLT3	KLF9	0.48287	1.90661e-108	pink	1.44861
FLT3	HSP90AA1	0.0912688	8.60427e-05	pink	0.273806
FLT3	LEF1	-0.185688	8.78403e-16	#6495ED	0.557065
FLT3	BNIP3	0.189848	1.93162e-16	pink	0.569545
FLT3	CD40	0.393141	2.77666e-69	pink	1.17942
FLT3	BCL2L11	-0.159464	5.54484e-12	#6495ED	0.478392
FLT3	EGFR	-0.0911116	8.85038e-05	#6495ED	0.273335
FLT3	TARDBP	0.349264	4.29268e-54	pink	1.04779
FLT3	APP	-0.130498	1.83219e-08	#6495ED	0.391494
FLT3	TNFRSF21	-0.159762	5.05847e-12	#6495ED	0.479286
HAT1	SIRT2	0.338354	1.13053e-50	pink	1.01506
HAT1	SIRT1	0.381559	4.82882e-65	pink	1.14468
HAT1	PLK1	0.579393	5.33956e-166	pink	1.73818
HAT1	MPG	0.653525	2.54217e-225	pink	1.96058
HAT1	BACH2	0.381425	5.39139e-65	pink	1.14428
HAT1	GATA3	0.284683	9.32382e-36	pink	0.854049
HAT1	MYCN	0.406026	3.33185e-74	pink	1.21808
HAT1	ALK	0.305746	3.04129e-41	pink	0.917238
HAT1	ATRX	0.387598	3.12067e-67	pink	1.16279
HAT1	TERT	0.155412	1.89891e-11	pink	0.466236
HAT1	SLC39A7	0.821966	0	pink	2.4659
HAT1	SPATA2	0.142341	8.10596e-10	pink	0.427022
HAT1	RNF31	0.269806	3.72429e-32	pink	0.809417
HAT1	IDH1	0.830778	0	pink	2.49233
HAT1	IDH2	0.724858	9.26156e-301	pink	2.17457
HAT1	KLF9	0.337981	1.47163e-50	pink	1.01394
HAT1	HDAC9	0.47688	1.88998e-105	pink	1.43064
HAT1	LEF1	0.515497	7.43879e-126	pink	1.54649
HAT1	BNIP3	0.193696	4.61346e-17	pink	0.581087
HAT1	CD40	0.177539	1.54304e-14	pink	0.532616
HAT1	BCL2L11	0.567784	4.83159e-158	pink	1.70335
HAT1	EGFR	0.421887	1.44593e-80	pink	1.26566
HAT1	DDX58	0.487551	7.89226e-111	pink	1.46265
HAT1	TARDBP	0.648127	1.94905e-220	pink	1.94438
HAT1	APP	0.531344	5.10351e-135	pink	1.59403
HAT1	TNFRSF21	0.521705	2.18475e-129	pink	1.56511
SIRT2	SIRT1	0.31005	2.01656e-42	pink	0.93015
SIRT2	PLK1	0.183933	1.64695e-15	pink	0.551799
SIRT2	MPG	0.339249	5.99279e-51	pink	1.01775
SIRT2	BACH2	0.244664	1.44572e-26	pink	0.733993
SIRT2	MYCN	0.285002	7.76222e-36	pink	0.855005
SIRT2	ATRX	0.104255	7.17136e-06	pink	0.312766
SIRT2	SLC39A7	0.369734	6.90892e-61	pink	1.1092
SIRT2	SPATA2	0.226956	5.41399e-23	pink	0.680867
SIRT2	RNF31	0.142822	7.10124e-10	pink	0.428465
SIRT2	IDH1	0.2961	1.12939e-38	pink	0.888301
SIRT2	IDH2	0.371714	1.43063e-61	pink	1.11514
SIRT2	KLF9	0.16479	1.04699e-12	pink	0.49437
SIRT2	HDAC9	0.342712	5.04822e-52	pink	1.02814
SIRT2	BNIP3	0.0977303	2.59676e-05	pink	0.293191
SIRT2	BCL2L11	0.24301	3.21011e-26	pink	0.729029
SIRT2	DDX58	0.116615	5.05753e-07	pink	0.349844
SIRT2	TARDBP	0.390248	3.30275e-68	pink	1.17074
SIRT2	APP	0.35296	2.77178e-55	pink	1.05888
SIRT2	TNFRSF21	0.631841	2.76454e-206	pink	1.89552
SIRT1	PLK1	0.21091	5.24471e-20	pink	0.632731
SIRT1	MPG	0.342099	7.84325e-52	pink	1.0263
SIRT1	BACH2	0.724224	5.51303e-300	pink	2.17267
SIRT1	MYCN	0.359797	1.58245e-57	pink	1.07939
SIRT1	ALK	0.104804	6.4124e-06	pink	0.314413
SIRT1	ATRX	0.633082	2.47078e-207	pink	1.89925
SIRT1	SLC39A7	0.448332	5.80665e-92	pink	1.345
SIRT1	SPATA2	0.335704	7.3028e-50	pink	1.00711
SIRT1	RNF31	0.509806	1.10984e-122	pink	1.52942
SIRT1	IDH1	0.310152	1.89049e-42	pink	0.930455
SIRT1	IDH2	0.197603	1.04487e-17	pink	0.592808
SIRT1	KLF9	0.614924	1.86309e-192	pink	1.84477
SIRT1	HDAC9	0.442478	2.36781e-89	pink	1.32743
SIRT1	HSP90AA1	0.28802	1.35173e-36	pink	0.864061
SIRT1	BNIP3	0.31764	1.50679e-44	pink	0.952921
SIRT1	CD40	0.239872	1.4332e-25	pink	0.719616
SIRT1	BCL2L11	0.354404	9.40849e-56	pink	1.06321
SIRT1	DDX58	0.223277	2.74775e-22	pink	0.669832
SIRT1	TARDBP	0.712996	1.29348e-286	pink	2.13899
SIRT1	APP	0.41498	9.3993e-78	pink	1.24494
SIRT1	TNFRSF21	0.430307	4.37588e-84	pink	1.29092
PLK1	MPG	0.415962	3.77571e-78	pink	1.24789
PLK1	BACH2	0.382576	2.0808e-65	pink	1.14773
PLK1	GATA3	0.165987	7.14469e-13	pink	0.49796
PLK1	MYCN	0.259226	9.95371e-30	pink	0.777678
PLK1	ALK	0.0980984	2.41995e-05	pink	0.294295
PLK1	ATRX	0.25299	2.38288e-28	pink	0.758971
PLK1	TERT	0.18819	3.5477e-16	pink	0.56457
PLK1	SLC39A7	0.579159	7.78717e-166	pink	1.73748
PLK1	RNF31	0.328726	9.10729e-48	pink	0.986178
PLK1	IDH1	0.601082	9.40497e-182	pink	1.80325
PLK1	IDH2	0.39204	7.1457e-69	pink	1.17612
PLK1	KLF9	0.157966	8.77399e-12	pink	0.473897
PLK1	HDAC9	0.26645	2.2524e-31	pink	0.799351
PLK1	HSP90AA1	0.0968509	3.07026e-05	pink	0.290553
PLK1	LEF1	0.429558	9.07363e-84	pink	1.28868
PLK1	BNIP3	0.203074	1.23868e-18	pink	0.609222
PLK1	CD40	0.241377	7.01189e-26	pink	0.72413
PLK1	BCL2L11	0.297259	5.61374e-39	pink	0.891778
PLK1	EGFR	0.307151	1.26024e-41	pink	0.921454
PLK1	DDX58	0.239392	1.79821e-25	pink	0.718176
PLK1	TARDBP	0.521887	1.71712e-129	pink	1.56566
PLK1	APP	0.193398	5.15929e-17	pink	0.580194
PLK1	TNFRSF21	0.213608	1.7148e-20	pink	0.640823
MPG	BACH2	0.305597	3.33728e-41	pink	0.916792
MPG	GATA3	0.154674	2.36783e-11	pink	0.464022
MPG	MYCN	0.353077	2.54112e-55	pink	1.05923
MPG	ALK	0.261172	3.62929e-30	pink	0.783516
MPG	ATRX	0.254757	9.77805e-29	pink	0.76427
MPG	SLC39A7	0.710718	5.57203e-284	pink	2.13215
MPG	SPATA2	0.207297	2.28956e-19	pink	0.621892
MPG	RNF31	0.432953	3.26631e-85	pink	1.29886
MPG	IDH1	0.611408	1.09395e-189	pink	1.83422
MPG	IDH2	0.576011	1.19925e-163	pink	1.72803
MPG	KLF9	0.349304	4.16943e-54	pink	1.04791
MPG	HDAC9	0.389439	6.56683e-68	pink	1.16832
MPG	LEF1	0.2755	1.65479e-33	pink	0.826501
MPG	BNIP3	0.244362	1.67329e-26	pink	0.733086
MPG	CD40	0.130036	2.05788e-08	pink	0.390109
MPG	BCL2L11	0.367904	2.93111e-60	pink	1.10371
MPG	EGFR	0.272118	1.06131e-32	pink	0.816354
MPG	DDX58	0.26565	3.44681e-31	pink	0.796951
MPG	TARDBP	0.489929	4.70283e-112	pink	1.46979
MPG	APP	0.472761	2.00643e-103	pink	1.41828
MPG	TNFRSF21	0.471076	1.32853e-102	pink	1.41323
BACH2	MYCN	0.270408	2.68838e-32	pink	0.811224
BACH2	ALK	0.141678	9.71911e-10	pink	0.425034
BACH2	ATRX	0.677218	5.30078e-248	pink	2.03165
BACH2	SLC39A7	0.473276	1.12416e-103	pink	1.41983
BACH2	SPATA2	0.359036	2.83008e-57	pink	1.07711
BACH2	RNF31	0.572488	3.15419e-161	pink	1.71746
BACH2	IDH1	0.326433	4.32777e-47	pink	0.979299
BACH2	IDH2	0.192304	7.77251e-17	pink	0.576911
BACH2	KLF9	0.54301	4.39981e-142	pink	1.62903
BACH2	HDAC9	0.459704	3.5019e-97	pink	1.37911
BACH2	HSP90AA1	0.267767	1.11498e-31	pink	0.803301
BACH2	BNIP3	0.247464	3.69741e-27	pink	0.742393
BACH2	CD40	0.265951	2.93827e-31	pink	0.797852
BACH2	BCL2L11	0.327306	2.39416e-47	pink	0.981919
BACH2	EGFR	0.107388	3.76089e-06	pink	0.322163
BACH2	DDX58	0.192035	8.59167e-17	pink	0.576105
BACH2	TARDBP	0.68481	9.91982e-256	pink	2.05443
BACH2	APP	0.356268	2.31407e-56	pink	1.0688
BACH2	TNFRSF21	0.285026	7.65184e-36	pink	0.855079
GATA3	ALK	0.0916132	8.0874e-05	pink	0.27484
GATA3	SLC39A7	0.280625	9.42179e-35	pink	0.841874
GATA3	IDH1	0.209846	8.11887e-20	pink	0.629538
GATA3	IDH2	0.217097	3.94718e-21	pink	0.651291
GATA3	HDAC9	0.133281	9.02009e-09	pink	0.399842
GATA3	LEF1	0.30087	6.2268e-40	pink	0.902611
GATA3	CD40	0.174443	4.42549e-14	pink	0.52333
GATA3	BCL2L11	0.212653	2.55189e-20	pink	0.637958
GATA3	EGFR	0.127418	3.94675e-08	pink	0.382254
GATA3	DDX58	0.190957	1.28272e-16	pink	0.57287
GATA3	TARDBP	0.147769	1.77494e-10	pink	0.443306
GATA3	APP	0.136986	3.43104e-09	pink	0.410959
GATA3	TNFRSF21	0.0943906	4.86901e-05	pink	0.283172
MYCN	ALK	0.146074	2.86953e-10	pink	0.438221
MYCN	ATRX	0.256183	4.73999e-29	pink	0.768548
MYCN	SLC39A7	0.392943	3.29341e-69	pink	1.17883
MYCN	RNF31	0.140361	1.39089e-09	pink	0.421082
MYCN	IDH1	0.413752	2.92634e-77	pink	1.24126
MYCN	IDH2	0.380675	1.00042e-64	pink	1.14203
MYCN	HDAC9	0.303508	1.22461e-40	pink	0.910525
MYCN	LEF1	0.127787	3.60361e-08	pink	0.38336
MYCN	CD40	-0.123591	9.98732e-08	#6495ED	0.370774
MYCN	BCL2L11	0.313862	1.75583e-43	pink	0.941585
MYCN	EGFR	0.12064	2.00573e-07	pink	0.361921
MYCN	DDX58	0.163064	1.80785e-12	pink	0.489193
MYCN	TARDBP	0.304383	7.11453e-41	pink	0.913149
MYCN	APP	0.32629	4.7671e-47	pink	0.97887
MYCN	TNFRSF21	0.424215	1.57369e-81	pink	1.27265
ALK	ATRX	0.281505	5.72413e-35	pink	0.844514
ALK	SLC39A7	0.318855	6.79298e-45	pink	0.956564
ALK	IDH1	0.345999	4.68681e-53	pink	1.038
ALK	IDH2	0.352426	4.12846e-55	pink	1.05728
ALK	HDAC9	0.414503	1.46114e-77	pink	1.24351
ALK	LEF1	0.206604	3.02857e-19	pink	0.619812
ALK	BCL2L11	0.20436	7.43653e-19	pink	0.613081
ALK	EGFR	0.188585	3.07097e-16	pink	0.565755
ALK	DDX58	0.239924	1.39801e-25	pink	0.719773
ALK	TARDBP	0.173169	6.79141e-14	pink	0.519506
ALK	APP	0.434719	5.70992e-86	pink	1.30416
ALK	TNFRSF21	0.239205	1.96452e-25	pink	0.717614
ATRX	SLC39A7	0.396621	1.36772e-70	pink	1.18986
ATRX	SPATA2	0.38379	7.58895e-66	pink	1.15137
ATRX	RNF31	0.378248	7.32585e-64	pink	1.13474
ATRX	IDH1	0.356566	1.84685e-56	pink	1.0697
ATRX	IDH2	0.231685	6.42706e-24	pink	0.695054
ATRX	KLF9	0.495596	5.16983e-115	pink	1.48679
ATRX	HDAC9	0.584587	1.15634e-169	pink	1.75376
ATRX	HSP90AA1	0.227848	3.63463e-23	pink	0.683544
ATRX	LEF1	0.15405	2.85126e-11	pink	0.462151
ATRX	BNIP3	0.342731	4.98059e-52	pink	1.02819
ATRX	CD40	0.186369	6.87345e-16	pink	0.559106
ATRX	BCL2L11	0.240477	1.07553e-25	pink	0.721432
ATRX	EGFR	0.158693	7.0251e-12	pink	0.476079
ATRX	DDX58	0.209085	1.10788e-19	pink	0.627256
ATRX	TARDBP	0.586993	2.20033e-171	pink	1.76098
ATRX	APP	0.513815	6.5432e-125	pink	1.54144
ATRX	TNFRSF21	0.265468	3.79673e-31	pink	0.796404
TERT	SLC39A7	0.129357	2.43963e-08	pink	0.388071
TERT	IDH1	0.185799	8.44115e-16	pink	0.557397
TERT	IDH2	0.143142	6.5008e-10	pink	0.429426
TERT	LEF1	0.200547	3.34229e-18	pink	0.601641
TERT	EGFR	0.207815	1.85687e-19	pink	0.623445
TERT	APP	0.103775	7.90434e-06	pink	0.311326
SLC39A7	SPATA2	0.206912	2.67469e-19	pink	0.620737
SLC39A7	RNF31	0.477619	8.12919e-106	pink	1.43286
SLC39A7	IDH1	0.748943	0	pink	2.24683
SLC39A7	IDH2	0.667172	3.95366e-238	pink	2.00152
SLC39A7	KLF9	0.403219	4.10478e-73	pink	1.20966
SLC39A7	HDAC9	0.453016	4.34381e-94	pink	1.35905
SLC39A7	LEF1	0.472413	2.96754e-103	pink	1.41724
SLC39A7	BNIP3	0.222493	3.87172e-22	pink	0.667478
SLC39A7	CD40	0.233382	2.95624e-24	pink	0.700147
SLC39A7	BCL2L11	0.533259	3.69078e-136	pink	1.59978
SLC39A7	EGFR	0.361778	3.4584e-58	pink	1.08534
SLC39A7	DDX58	0.428426	2.72748e-83	pink	1.28528
SLC39A7	TARDBP	0.693185	1.56219e-264	pink	2.07955
SLC39A7	APP	0.577637	8.9548e-165	pink	1.73291
SLC39A7	TNFRSF21	0.580488	9.12572e-167	pink	1.74147
SPATA2	RNF31	0.333398	3.64759e-49	pink	1.0002
SPATA2	IDH2	0.174691	4.07006e-14	pink	0.524074
SPATA2	KLF9	0.471125	1.25783e-102	pink	1.41337
SPATA2	HDAC9	0.274071	3.64084e-33	pink	0.822213
SPATA2	HSP90AA1	0.338196	1.26349e-50	pink	1.01459
SPATA2	BNIP3	0.415521	5.68915e-78	pink	1.24656
SPATA2	CD40	0.154478	2.51056e-11	pink	0.463433
SPATA2	DDX58	0.141037	1.15771e-09	pink	0.42311
SPATA2	TARDBP	0.457266	4.78588e-96	pink	1.3718
SPATA2	APP	0.423044	4.81144e-81	pink	1.26913
SPATA2	TNFRSF21	0.167057	5.06295e-13	pink	0.501172
RNF31	IDH1	0.226589	6.37374e-23	pink	0.679767
RNF31	IDH2	0.134625	6.37123e-09	pink	0.403875
RNF31	KLF9	0.546771	2.0249e-144	pink	1.64031
RNF31	HDAC9	0.229309	1.88594e-23	pink	0.687928
RNF31	BNIP3	0.265324	4.09784e-31	pink	0.795972
RNF31	CD40	0.451168	3.02356e-93	pink	1.3535
RNF31	BCL2L11	0.192024	8.62807e-17	pink	0.576071
RNF31	EGFR	0.110979	1.75494e-06	pink	0.332937
RNF31	DDX58	0.326094	5.442e-47	pink	0.978282
RNF31	TARDBP	0.583844	3.90289e-169	pink	1.75153
RNF31	APP	0.11652	5.16688e-07	pink	0.34956
RNF31	TNFRSF21	0.119028	2.91566e-07	pink	0.357083
IDH1	IDH2	0.646006	1.5219e-218	pink	1.93802
IDH1	KLF9	0.194045	4.045e-17	pink	0.582135
IDH1	HDAC9	0.508223	8.27371e-122	pink	1.52467
IDH1	LEF1	0.465996	3.71643e-100	pink	1.39799
IDH1	BNIP3	0.115569	6.39955e-07	pink	0.346706
IDH1	CD40	0.138837	2.09658e-09	pink	0.416511
IDH1	BCL2L11	0.476619	2.54466e-105	pink	1.42986
IDH1	EGFR	0.493051	1.12044e-113	pink	1.47915
IDH1	DDX58	0.413393	4.07603e-77	pink	1.24018
IDH1	TARDBP	0.535939	9.08973e-138	pink	1.60782
IDH1	APP	0.49006	4.0237e-112	pink	1.47018
IDH1	TNFRSF21	0.537234	1.49866e-138	pink	1.6117
IDH2	KLF9	0.208393	1.46853e-19	pink	0.62518
IDH2	HDAC9	0.342469	6.01419e-52	pink	1.02741
IDH2	LEF1	0.399583	1.02459e-71	pink	1.19875
IDH2	BNIP3	0.123912	9.25018e-08	pink	0.371735
IDH2	BCL2L11	0.483438	9.84383e-109	pink	1.45031
IDH2	EGFR	0.305542	3.45454e-41	pink	0.916626
IDH2	DDX58	0.36482	3.27876e-59	pink	1.09446
IDH2	TARDBP	0.404142	1.80262e-73	pink	1.21243
IDH2	APP	0.473278	1.12123e-103	pink	1.41983
IDH2	TNFRSF21	0.48135	1.11254e-107	pink	1.44405
KLF9	HDAC9	0.319436	4.63323e-45	pink	0.958307
KLF9	HSP90AA1	0.161095	3.34766e-12	pink	0.483285
KLF9	BNIP3	0.347368	1.72602e-53	pink	1.0421
KLF9	CD40	0.284435	1.07518e-35	pink	0.853304
KLF9	BCL2L11	0.203195	1.18068e-18	pink	0.609586
KLF9	EGFR	0.102905	9.41829e-06	pink	0.308716
KLF9	DDX58	0.17403	5.08674e-14	pink	0.52209
KLF9	TARDBP	0.594583	6.62144e-177	pink	1.78375
KLF9	APP	0.316792	2.62334e-44	pink	0.950375
KLF9	TNFRSF21	0.239978	1.36323e-25	pink	0.719933
HDAC9	HSP90AA1	0.131502	1.42107e-08	pink	0.394507
HDAC9	LEF1	0.217163	3.8381e-21	pink	0.651489
HDAC9	BNIP3	0.276438	9.84179e-34	pink	0.829313
HDAC9	BCL2L11	0.314578	1.10519e-43	pink	0.943735
HDAC9	EGFR	0.251754	4.42738e-28	pink	0.755261
HDAC9	DDX58	0.279974	1.36022e-34	pink	0.839922
HDAC9	TARDBP	0.498523	1.4575e-116	pink	1.49557
HDAC9	APP	0.625668	3.85882e-201	pink	1.877
HDAC9	TNFRSF21	0.457425	4.0366e-96	pink	1.37228
HSP90AA1	BNIP3	0.22537	1.09443e-22	pink	0.67611
HSP90AA1	CD40	0.168274	3.41415e-13	pink	0.504822
HSP90AA1	TARDBP	0.318165	1.06817e-44	pink	0.954496
HSP90AA1	APP	0.171689	1.11224e-13	pink	0.515066
LEF1	CD40	0.283107	2.29958e-35	pink	0.849321
LEF1	BCL2L11	0.465748	4.88177e-100	pink	1.39724
LEF1	EGFR	0.326669	3.68864e-47	pink	0.980007
LEF1	DDX58	0.330237	3.23798e-48	pink	0.99071
LEF1	TARDBP	0.279248	2.04705e-34	pink	0.837744
LEF1	APP	0.305534	3.4728e-41	pink	0.916601
LEF1	TNFRSF21	0.273805	4.21384e-33	pink	0.821416
BNIP3	CD40	0.161866	2.63288e-12	pink	0.485597
BNIP3	BCL2L11	0.134972	5.8216e-09	pink	0.404915
BNIP3	TARDBP	0.367068	5.6552e-60	pink	1.1012
BNIP3	APP	0.346392	3.51907e-53	pink	1.03918
BNIP3	TNFRSF21	0.11415	8.77731e-07	pink	0.342451
CD40	BCL2L11	0.354389	9.51398e-56	pink	1.06317
CD40	DDX58	0.405784	4.14039e-74	pink	1.21735
CD40	TARDBP	0.37922	3.3082e-64	pink	1.13766
BCL2L11	EGFR	0.178001	1.31627e-14	pink	0.534002
BCL2L11	DDX58	0.52117	4.42842e-129	pink	1.56351
BCL2L11	TARDBP	0.411281	2.83443e-76	pink	1.23384
BCL2L11	APP	0.346185	4.09292e-53	pink	1.03855
BCL2L11	TNFRSF21	0.45173	1.67766e-93	pink	1.35519
EGFR	DDX58	0.226838	5.70578e-23	pink	0.680513
EGFR	TARDBP	0.250688	7.52898e-28	pink	0.752065
EGFR	APP	0.26763	1.20003e-31	pink	0.802889
EGFR	TNFRSF21	0.165893	7.36331e-13	pink	0.497678
DDX58	TARDBP	0.384141	5.66305e-66	pink	1.15242
DDX58	APP	0.278524	3.07341e-34	pink	0.835571
DDX58	TNFRSF21	0.233844	2.39026e-24	pink	0.701533
TARDBP	APP	0.520595	9.46316e-129	pink	1.56179
TARDBP	TNFRSF21	0.424172	1.63946e-81	pink	1.27252
APP	TNFRSF21	0.588696	1.30761e-172	pink	1.76609

## Sheet: Supplementary Table 8
Supplementary Table 8: The infiltration of most immune cells of glioma patients by the ssGSEA algorithm
id	Activated.B.cellna	Activated.CD4.T.cellna	Activated.CD8.T.cellna	Activated.dendritic.cellna	CD56bright.natural.killer.cellna	CD56dim.natural.killer.cellna	Eosinophilna	Gamma.delta.T.cellna	Immature..B.cellna	Immature.dendritic.cellna	MDSCna	Macrophagena	Mast.cellna	Monocytena	Natural.killer.T.cellna	Natural.killer.cellna	Neutrophilna	Plasmacytoid.dendritic.cellna	Regulatory.T.cellna	T.follicular.helper.cellna	Type.1.T.helper.cellna	Type.17.T.helper.cellna	Type.2.T.helper.cellna
TCGA-06-0681	0.367705	0.539541	0.598255	0.576281	0.710478	0.828022	0.526544	0.621096	0.407187	0.733219	0.707422	0.541789	0.50928	0.860057	0.534574	0.741324	0.226706	0.771638	0.590963	0.642829	0.655196	0.508735	0.603117
TCGA-06-0675	0.336385	0.504935	0.556936	0.561839	0.716598	0.806082	0.5045	0.658735	0.403214	0.732263	0.703097	0.562391	0.491219	0.852353	0.522039	0.715974	0.162609	0.766957	0.650997	0.650049	0.626549	0.494171	0.602553
TCGA-06-0678	0.308188	0.524221	0.57142	0.566792	0.72073	0.831684	0.509143	0.613238	0.355755	0.742981	0.703142	0.51895	0.490511	0.849341	0.566974	0.723831	0.208193	0.777286	0.607762	0.662769	0.646944	0.551754	0.604911
TCGA-06-AABW	0.289272	0.481635	0.578391	0.528998	0.703631	0.808596	0.465988	0.614444	0.390568	0.730391	0.641326	0.434557	0.426529	0.845143	0.502822	0.707365	0.0582428	0.783005	0.538081	0.618371	0.59042	0.443172	0.591442
TCGA-06-0680	0.26912	0.486023	0.566917	0.517868	0.718065	0.807688	0.479691	0.589428	0.375162	0.708027	0.645267	0.50013	0.466974	0.849218	0.500853	0.699834	0.168339	0.761151	0.59225	0.643891	0.62155	0.508451	0.582209
TCGA-41-2572	0.244158	0.616164	0.679139	0.674937	0.758813	0.802363	0.415718	0.682949	0.485604	0.771606	0.837979	0.589185	0.497453	0.852859	0.57454	0.735056	0.284116	0.780709	0.680021	0.697154	0.647858	0.48057	0.647727
TCGA-32-2634	0.298002	0.644796	0.570673	0.638689	0.774056	0.790555	0.464641	0.675654	0.381802	0.766791	0.735171	0.544468	0.487895	0.843128	0.529583	0.729808	0.160769	0.796018	0.667237	0.666304	0.605301	0.494125	0.66114
TCGA-06-0747	0.295976	0.580158	0.551398	0.58754	0.744962	0.803653	0.384459	0.661646	0.425975	0.741187	0.738974	0.511696	0.47837	0.824047	0.525403	0.728581	0.319861	0.781159	0.618719	0.641051	0.599131	0.498155	0.611693
TCGA-26-5134	0.202723	0.652862	0.599508	0.592446	0.730256	0.747742	0.352887	0.654089	0.462134	0.686556	0.790593	0.517095	0.412206	0.838743	0.490852	0.704684	0.0978932	0.746248	0.617696	0.648725	0.586013	0.374829	0.665165
TCGA-32-1980	0.433663	0.649279	0.735283	0.680203	0.762169	0.865614	0.471848	0.73036	0.524996	0.786603	0.902197	0.659011	0.58863	0.871007	0.606563	0.804736	0.357993	0.794306	0.763083	0.755071	0.69096	0.528775	0.702303
TCGA-12-5299	0.270903	0.674153	0.629353	0.675531	0.77863	0.799012	0.444435	0.758102	0.514387	0.777257	0.853699	0.631641	0.543308	0.860628	0.574161	0.762346	0.380064	0.78677	0.740006	0.723908	0.644171	0.529274	0.656609
TCGA-06-2562	0.316273	0.663366	0.615299	0.686645	0.761261	0.837617	0.446041	0.733944	0.494804	0.819559	0.836213	0.621318	0.527356	0.86012	0.577586	0.759282	0.342426	0.781096	0.752545	0.720192	0.651336	0.539077	0.669716
TCGA-06-2559	0.254145	0.678868	0.594519	0.642014	0.760852	0.764705	0.432677	0.711079	0.461628	0.760171	0.795195	0.571347	0.511335	0.8502	0.544006	0.729702	0.260279	0.781466	0.715273	0.690106	0.633959	0.495365	0.680752
TCGA-76-4927	0.343806	0.67924	0.659077	0.674739	0.749407	0.813318	0.424415	0.758008	0.470206	0.766168	0.860584	0.637464	0.500778	0.873489	0.569026	0.788031	0.317584	0.779286	0.73889	0.724183	0.642676	0.515229	0.685915
TCGA-06-0158	0.388856	0.634824	0.671782	0.642154	0.773121	0.82947	0.475381	0.701859	0.537344	0.754454	0.853843	0.598699	0.542303	0.870846	0.569183	0.766758	0.342177	0.808083	0.65133	0.717454	0.641227	0.500243	0.654126
TCGA-19-2624	0.199952	0.637432	0.564564	0.584394	0.750977	0.768506	0.440431	0.636597	0.289249	0.719897	0.654484	0.457351	0.40359	0.809372	0.501553	0.687677	0.178084	0.74359	0.539539	0.602538	0.567969	0.447011	0.661438
TCGA-12-3650	0.232377	0.68155	0.675217	0.631466	0.758275	0.772563	0.414712	0.668175	0.459185	0.731892	0.794944	0.603341	0.481311	0.832773	0.543842	0.713085	0.311118	0.773765	0.649051	0.720256	0.628135	0.480094	0.671246
TCGA-41-3915	0.35317	0.702428	0.723091	0.699948	0.777406	0.794649	0.467545	0.780921	0.501746	0.818457	0.899454	0.666407	0.607605	0.884924	0.592214	0.778776	0.504255	0.811645	0.823656	0.741836	0.678957	0.537556	0.681756
TCGA-12-0821	0.262279	0.652079	0.634557	0.658475	0.765833	0.798697	0.396708	0.714581	0.418186	0.737179	0.770434	0.563224	0.492815	0.848215	0.549346	0.727669	0.277114	0.744912	0.662049	0.66966	0.599068	0.479175	0.677349
TCGA-06-0125	0.294577	0.606123	0.565508	0.647083	0.738166	0.806702	0.38785	0.716639	0.441209	0.760922	0.757849	0.544877	0.46788	0.821653	0.530663	0.71986	0.318256	0.772203	0.687166	0.672866	0.619401	0.456276	0.657675
TCGA-19-2625	0.235537	0.597763	0.561099	0.628032	0.772708	0.762295	0.419214	0.713817	0.403178	0.739408	0.798607	0.539713	0.48713	0.86	0.534449	0.747481	0.219373	0.774921	0.696192	0.65548	0.608627	0.478865	0.658443
TCGA-32-5222	0.295576	0.697608	0.706884	0.698466	0.75693	0.767999	0.475765	0.720382	0.529047	0.777722	0.857708	0.62996	0.591431	0.856034	0.579014	0.763076	0.431693	0.798931	0.694974	0.742693	0.645944	0.481987	0.681542
TCGA-06-0125-1	0.351346	0.615003	0.666414	0.706897	0.76604	0.835366	0.444182	0.734471	0.536459	0.789781	0.835374	0.617929	0.571512	0.856774	0.602823	0.772595	0.317356	0.787133	0.757673	0.71759	0.673729	0.512584	0.647424
TCGA-06-0139	0.438826	0.707433	0.820586	0.763747	0.784434	0.806113	0.498813	0.835711	0.602748	0.843987	0.995579	0.776438	0.689251	0.926973	0.651905	0.794638	0.60524	0.853879	0.896562	0.816678	0.739982	0.549752	0.681089
TCGA-06-2564	0.298548	0.642125	0.659858	0.667012	0.746527	0.773683	0.465349	0.711816	0.493032	0.782655	0.839885	0.60542	0.529356	0.864093	0.582283	0.750038	0.382488	0.798726	0.699444	0.736018	0.62716	0.511271	0.664437
TCGA-06-0743	0.359052	0.601276	0.714897	0.669014	0.759233	0.817687	0.427788	0.725477	0.452422	0.754973	0.820054	0.593509	0.509384	0.849081	0.582017	0.715085	0.344814	0.781697	0.645786	0.69519	0.642184	0.489331	0.64304
TCGA-15-0742	0.22431	0.62174	0.605215	0.630588	0.75941	0.807742	0.380134	0.697617	0.371746	0.735538	0.758529	0.553522	0.459505	0.835432	0.569588	0.726264	0.34842	0.772899	0.663702	0.671881	0.588591	0.481343	0.646309
TCGA-06-0219	0.348145	0.667522	0.713285	0.685365	0.761464	0.771114	0.423918	0.718664	0.50014	0.749377	0.82584	0.61685	0.535441	0.832035	0.569873	0.727286	0.29969	0.765078	0.699571	0.701849	0.614616	0.490907	0.671457
TCGA-06-0129	0.323601	0.694882	0.64129	0.632414	0.790023	0.728042	0.413902	0.664703	0.531073	0.717431	0.81858	0.561582	0.488004	0.847798	0.510142	0.735213	0.226364	0.76315	0.656505	0.690115	0.609262	0.475737	0.679128
TCGA-28-1753	0.346832	0.724152	0.726137	0.700863	0.776819	0.780395	0.472237	0.79509	0.51293	0.797397	0.909501	0.698609	0.673028	0.882713	0.61469	0.765888	0.286621	0.792348	0.826959	0.751849	0.683971	0.46417	0.695135
TCGA-06-0645	0.400446	0.730689	0.72625	0.738366	0.771436	0.833353	0.505034	0.783099	0.568873	0.81267	0.947494	0.722553	0.6992	0.900889	0.623675	0.790171	0.486013	0.824263	0.830577	0.782154	0.701373	0.552009	0.693045
TCGA-19-2619	0.330455	0.6714	0.609445	0.654098	0.77817	0.773957	0.488315	0.681101	0.380015	0.761066	0.777455	0.583818	0.514565	0.829139	0.590294	0.732105	0.397775	0.802695	0.663912	0.672538	0.613237	0.534185	0.658603
TCGA-08-0386	0.280277	0.5861	0.53397	0.619463	0.805051	0.809636	0.399069	0.672191	0.373454	0.732138	0.740174	0.542314	0.4843	0.855544	0.568319	0.715495	0.326521	0.790791	0.674282	0.662983	0.589628	0.4753	0.632065
TCGA-06-5408	0.318126	0.6521	0.590293	0.676934	0.769475	0.782509	0.438345	0.74724	0.504152	0.732183	0.810871	0.591147	0.523771	0.827069	0.589183	0.738234	0.351959	0.791125	0.72468	0.706388	0.640763	0.489979	0.675674
TCGA-14-0736	0.599468	0.626275	0.805657	0.735628	0.78555	0.829378	0.463739	0.750529	0.599144	0.793509	0.911379	0.667344	0.626537	0.86989	0.573938	0.745989	0.295721	0.764832	0.744199	0.751368	0.69906	0.518963	0.640967
TCGA-14-1823	0.386567	0.684797	0.722966	0.697382	0.791172	0.780827	0.457603	0.74442	0.535595	0.759266	0.896574	0.632678	0.568671	0.85115	0.593735	0.762131	0.29866	0.786535	0.731479	0.739172	0.650978	0.475866	0.667893
TCGA-02-0047	0.32076	0.653427	0.603426	0.674297	0.756095	0.846838	0.466026	0.703771	0.527048	0.781663	0.846707	0.616441	0.557866	0.86397	0.552253	0.756245	0.291105	0.76167	0.728363	0.713257	0.644914	0.488113	0.668418
TCGA-19-4065	0.348644	0.713927	0.706456	0.733353	0.769733	0.779277	0.464444	0.753038	0.532012	0.812728	0.920674	0.684307	0.591788	0.868382	0.595897	0.752532	0.301814	0.808659	0.827694	0.743514	0.679771	0.501194	0.676999
TCGA-14-1825	0.242726	0.666509	0.604097	0.663647	0.72547	0.766202	0.425656	0.678834	0.424343	0.742923	0.750843	0.535469	0.470416	0.842946	0.531181	0.700238	0.256676	0.753855	0.668902	0.64595	0.597832	0.423758	0.673377
TCGA-06-0171	0.496854	0.68284	0.796128	0.793812	0.779967	0.846256	0.503252	0.836736	0.669326	0.847489	1	0.775804	0.72797	0.924107	0.668424	0.854529	0.76	0.888466	0.890905	0.830898	0.751549	0.584208	0.669687
TCGA-06-5414	0.32205	0.687564	0.697739	0.687319	0.753132	0.760829	0.447609	0.750196	0.531202	0.791755	0.889364	0.628465	0.59555	0.87754	0.589674	0.783571	0.452126	0.804609	0.759315	0.719917	0.65518	0.525292	0.651155
TCGA-12-0619	0.351315	0.694619	0.687234	0.703636	0.764325	0.789072	0.473896	0.742292	0.520242	0.783198	0.895391	0.655733	0.606435	0.858989	0.615334	0.783553	0.470816	0.800538	0.791269	0.745944	0.673546	0.543211	0.680697
TCGA-06-0744	0.332195	0.608296	0.667019	0.630035	0.753752	0.828004	0.42469	0.685865	0.436857	0.756779	0.781502	0.522624	0.461283	0.863534	0.567197	0.723284	0.292245	0.777451	0.630897	0.659603	0.599199	0.485772	0.613959
TCGA-15-1444	0.314667	0.649434	0.636498	0.626135	0.758158	0.708963	0.560745	0.689522	0.500661	0.754331	0.842375	0.588155	0.591305	0.856853	0.541737	0.748929	0.355128	0.786092	0.635066	0.70598	0.617263	0.522497	0.666737
TCGA-06-2565	0.283038	0.596275	0.655509	0.668153	0.765335	0.763987	0.420054	0.687724	0.491518	0.7495	0.777819	0.550387	0.490582	0.817167	0.575864	0.730995	0.281255	0.801662	0.670931	0.674538	0.626955	0.494429	0.642431
TCGA-06-5411	0.374549	0.659449	0.647663	0.659416	0.742464	0.819534	0.439337	0.728425	0.498072	0.742615	0.826078	0.63142	0.550106	0.872902	0.562756	0.760026	0.304664	0.776297	0.731603	0.714548	0.627933	0.49808	0.678841
TCGA-32-2616	0.322856	0.663161	0.690097	0.638453	0.763107	0.793636	0.429455	0.719585	0.515895	0.785252	0.833365	0.580923	0.462723	0.862498	0.586377	0.74287	0.388484	0.803921	0.698424	0.721989	0.615607	0.523501	0.661129
TCGA-76-4932	0.280397	0.648373	0.610043	0.633009	0.770874	0.757983	0.433132	0.679016	0.50066	0.76517	0.804103	0.561736	0.468619	0.846373	0.56196	0.71661	0.291897	0.782963	0.66512	0.691555	0.628002	0.471646	0.661258
TCGA-41-2571	0.258739	0.574602	0.571551	0.62713	0.743897	0.812255	0.382701	0.659565	0.414665	0.710914	0.76841	0.544118	0.491711	0.849867	0.520409	0.682959	0.188707	0.758817	0.647363	0.671734	0.575486	0.429391	0.604503
TCGA-27-2524	0.282447	0.713515	0.699821	0.708382	0.786186	0.839165	0.433433	0.744484	0.495452	0.784387	0.872254	0.669781	0.563545	0.863261	0.627408	0.746586	0.264297	0.785123	0.75928	0.750447	0.665502	0.525943	0.669163
TCGA-14-0781	0.330146	0.633267	0.673738	0.691061	0.792591	0.771223	0.474911	0.762529	0.485299	0.805461	0.891296	0.65258	0.608572	0.8768	0.589001	0.777129	0.466049	0.821144	0.80213	0.731375	0.671329	0.561979	0.664215
TCGA-19-5960	0.271646	0.6236	0.631052	0.563276	0.776839	0.788463	0.408662	0.651495	0.421653	0.673	0.658237	0.48344	0.371468	0.826866	0.535869	0.691139	0.0829737	0.751342	0.561257	0.616663	0.578605	0.47326	0.674134
TCGA-06-0211	0.312566	0.646287	0.645735	0.656712	0.751948	0.793155	0.412941	0.72225	0.475066	0.75953	0.790665	0.585027	0.464586	0.841523	0.584014	0.718648	0.364034	0.784471	0.653373	0.687648	0.626301	0.51204	0.660134
TCGA-27-1830	0.331078	0.696362	0.711466	0.721188	0.777949	0.781029	0.512792	0.716492	0.53678	0.777905	0.861341	0.604503	0.599753	0.870877	0.56207	0.764754	0.421468	0.809872	0.769264	0.699782	0.649596	0.51204	0.661184
TCGA-06-0745	0.278495	0.69488	0.706909	0.686073	0.783439	0.750147	0.469739	0.748432	0.502527	0.766439	0.870774	0.641223	0.613579	0.870497	0.572963	0.741052	0.425333	0.794523	0.725349	0.717404	0.637795	0.501681	0.681021
TCGA-32-2632	0.426502	0.663793	0.770175	0.65928	0.776391	0.842537	0.452272	0.711324	0.57743	0.770934	0.890086	0.646322	0.531194	0.870889	0.611417	0.777428	0.373994	0.794773	0.720793	0.752548	0.682041	0.544651	0.690102
TCGA-06-5418	0.262502	0.659714	0.6287	0.703108	0.731202	0.77439	0.424791	0.744347	0.480927	0.774017	0.863143	0.622671	0.582285	0.860653	0.565023	0.748677	0.423795	0.808119	0.757396	0.711499	0.653213	0.494802	0.654132
TCGA-26-5135	0.31251	0.630638	0.65723	0.669874	0.768132	0.839838	0.418953	0.699825	0.459509	0.742344	0.859552	0.594669	0.547859	0.886379	0.573787	0.743025	0.289298	0.776491	0.7438	0.701303	0.638549	0.544898	0.631417
TCGA-28-1747	0.357053	0.68092	0.729257	0.670433	0.759409	0.765757	0.450239	0.667392	0.581232	0.746376	0.85864	0.590443	0.486242	0.871973	0.590591	0.762454	0.230931	0.788481	0.610692	0.720537	0.661727	0.4797	0.689378
TCGA-06-0184	0.339862	0.617415	0.70387	0.685718	0.766105	0.778555	0.458619	0.706861	0.535005	0.782251	0.900719	0.688301	0.603014	0.887016	0.611831	0.788741	0.454617	0.817953	0.73552	0.767305	0.668608	0.564635	0.661651
TCGA-14-1402	0.372276	0.68484	0.75822	0.664783	0.776883	0.768529	0.410988	0.728541	0.524311	0.773783	0.836904	0.610676	0.582297	0.824767	0.590497	0.723833	0.330913	0.782684	0.699175	0.68699	0.647509	0.460382	0.654138
TCGA-32-1970	0.347335	0.599353	0.629095	0.600167	0.754967	0.80051	0.414556	0.670333	0.482975	0.723706	0.767819	0.555496	0.446344	0.856707	0.592791	0.734764	0.329454	0.780563	0.6167	0.685542	0.631317	0.490471	0.669005
TCGA-12-3652	0.261981	0.649783	0.678346	0.650178	0.751604	0.756676	0.412371	0.676081	0.416997	0.719626	0.751848	0.570899	0.458744	0.797234	0.556198	0.689503	0.223347	0.751985	0.634597	0.672196	0.636451	0.472769	0.622817
TCGA-06-0190	0.42598	0.771785	0.770146	0.726464	0.814122	0.812286	0.521602	0.818588	0.576073	0.804802	0.939508	0.770484	0.773709	0.867553	0.669854	0.789575	0.520232	0.855146	0.884583	0.785813	0.748811	0.535408	0.746976
TCGA-76-4926	0.302523	0.591625	0.6002	0.627864	0.744854	0.772822	0.37087	0.691749	0.40758	0.756399	0.780625	0.576479	0.477485	0.845446	0.55649	0.709958	0.268133	0.759893	0.646927	0.67456	0.61219	0.493646	0.670152
TCGA-19-2629	0.367644	0.680557	0.726221	0.618373	0.77895	0.759301	0.47632	0.695202	0.584563	0.724901	0.842998	0.616354	0.504459	0.878801	0.548	0.780515	0.25007	0.775551	0.657396	0.694433	0.625006	0.524924	0.692241
TCGA-27-1837	0.302808	0.631287	0.645886	0.654996	0.75908	0.80199	0.429657	0.661895	0.52026	0.736946	0.821772	0.560193	0.472797	0.86716	0.557833	0.727588	0.277385	0.760183	0.644483	0.695448	0.632904	0.46593	0.651321
TCGA-06-0878	0.339365	0.688189	0.647996	0.731912	0.746327	0.776132	0.452162	0.765421	0.537072	0.785445	0.881488	0.618651	0.585248	0.848692	0.569663	0.757924	0.384286	0.802218	0.774783	0.708024	0.651771	0.482331	0.691485
TCGA-76-4931	0.294927	0.646226	0.585147	0.612074	0.7641	0.814243	0.407031	0.700216	0.402934	0.739612	0.755775	0.546578	0.452239	0.84646	0.53053	0.713173	0.23252	0.773012	0.657157	0.656337	0.591483	0.484711	0.650843
TCGA-06-0750	0.336443	0.629531	0.696405	0.702621	0.774708	0.799307	0.455754	0.781154	0.50849	0.794093	0.890426	0.647313	0.618771	0.863641	0.610788	0.770985	0.477278	0.80626	0.778269	0.736957	0.660939	0.524755	0.632219
TCGA-28-2499	0.283613	0.523488	0.649681	0.637155	0.735177	0.799761	0.419854	0.712029	0.5188	0.767734	0.795857	0.554248	0.476101	0.808037	0.527501	0.736615	0.313778	0.774911	0.700834	0.712381	0.621688	0.518867	0.617278
TCGA-06-0649	0.433016	0.627737	0.736782	0.723981	0.795684	0.777811	0.49454	0.749592	0.546267	0.78319	0.895582	0.64539	0.582657	0.868445	0.580002	0.770836	0.361311	0.816666	0.786063	0.735007	0.670313	0.51243	0.645829
TCGA-06-0156	0.401868	0.75425	0.714713	0.742875	0.75957	0.790083	0.447448	0.817453	0.48472	0.789751	0.88222	0.648763	0.590208	0.841743	0.605105	0.761235	0.465333	0.810414	0.807185	0.728604	0.662316	0.515035	0.689285
TCGA-28-5216	0.233049	0.681479	0.628269	0.681062	0.761439	0.810591	0.463771	0.718362	0.467841	0.780038	0.830838	0.601419	0.551651	0.853338	0.564986	0.753176	0.308033	0.775707	0.742603	0.70294	0.654199	0.522752	0.651934
TCGA-02-2486	0.405882	0.64393	0.792402	0.71483	0.77469	0.765863	0.452045	0.756753	0.636906	0.842881	0.948737	0.693384	0.680453	0.879589	0.608275	0.808	0.403254	0.814825	0.773858	0.760413	0.67838	0.486495	0.626107
TCGA-02-0055	0.327118	0.768693	0.745999	0.752886	0.796613	0.815802	0.532199	0.798081	0.54035	0.837369	0.939919	0.724811	0.680649	0.860677	0.648221	0.777541	0.541921	0.842902	0.852541	0.773443	0.719684	0.528262	0.697168
TCGA-32-2615	0.295842	0.682647	0.702589	0.700175	0.774959	0.835829	0.459813	0.749021	0.515488	0.779121	0.888166	0.604653	0.562338	0.864942	0.585807	0.783878	0.405871	0.80575	0.784704	0.713599	0.655846	0.510915	0.644814
TCGA-06-0174	0.219137	0.650558	0.589875	0.637984	0.780051	0.78505	0.414829	0.685189	0.417824	0.756325	0.775292	0.600088	0.507424	0.86069	0.551214	0.721571	0.348489	0.775151	0.715529	0.674684	0.620696	0.48345	0.670276
TCGA-06-5856	0.339307	0.652	0.651956	0.654713	0.771312	0.7608	0.399741	0.739521	0.49291	0.757835	0.825473	0.624979	0.543612	0.842324	0.609657	0.755023	0.329515	0.791249	0.78409	0.722871	0.647951	0.529693	0.706623
TCGA-06-0644	0.400043	0.730311	0.756304	0.72689	0.771432	0.780811	0.427535	0.83326	0.561949	0.802225	0.911919	0.696102	0.642041	0.863014	0.646339	0.780207	0.384982	0.796288	0.869877	0.78139	0.696344	0.572597	0.7164
TCGA-06-5412	0.423755	0.690355	0.753248	0.749232	0.761245	0.800985	0.493977	0.734892	0.558494	0.785406	0.930245	0.679526	0.628301	0.886907	0.641644	0.77019	0.463161	0.81543	0.789586	0.759393	0.701451	0.561164	0.686733
TCGA-12-5295	0.315022	0.709217	0.766911	0.666612	0.749244	0.723838	0.477617	0.717607	0.564583	0.780612	0.884639	0.587827	0.563355	0.854297	0.560819	0.746847	0.358991	0.786496	0.725506	0.73357	0.650699	0.455617	0.694931
TCGA-27-1834	0.391597	0.607144	0.727975	0.643418	0.795177	0.815567	0.51228	0.702957	0.606137	0.779468	0.841128	0.602582	0.519043	0.85874	0.566145	0.748661	0.278307	0.811864	0.697171	0.710802	0.660811	0.545248	0.65386
TCGA-27-1831	0.400204	0.700477	0.763949	0.672418	0.752939	0.749111	0.474919	0.713576	0.509105	0.778389	0.866774	0.619507	0.557521	0.863582	0.588924	0.743264	0.296028	0.778691	0.691127	0.728781	0.657653	0.504359	0.678844
TCGA-06-0132	0.433098	0.628499	0.739234	0.699219	0.781573	0.850082	0.489998	0.763709	0.547728	0.79932	0.934101	0.711693	0.625977	0.893955	0.608765	0.799771	0.36412	0.80075	0.79728	0.789963	0.707113	0.521117	0.659394
TCGA-12-0618	0.229825	0.612007	0.550757	0.593519	0.773329	0.757733	0.426071	0.686629	0.375189	0.715291	0.722876	0.50824	0.477573	0.856529	0.547065	0.702251	0.270152	0.785508	0.6773	0.644348	0.604453	0.462192	0.660466
TCGA-28-5208	0.42323	0.688736	0.681395	0.689448	0.755932	0.803588	0.455532	0.737009	0.531427	0.75507	0.843015	0.657233	0.517972	0.863219	0.591368	0.749454	0.29959	0.779151	0.715935	0.731667	0.659625	0.516066	0.690342
TCGA-06-5417	0.199545	0.62281	0.574919	0.588319	0.754281	0.705564	0.506217	0.675887	0.354946	0.725498	0.685175	0.540109	0.47968	0.779872	0.51569	0.684288	0.246093	0.740405	0.654456	0.642091	0.567151	0.45046	0.696145
TCGA-28-5215	0.404362	0.749442	0.710327	0.677681	0.765034	0.781638	0.496815	0.723914	0.526365	0.769136	0.865543	0.631252	0.591178	0.871663	0.543537	0.745854	0.309511	0.774878	0.74587	0.731905	0.665301	0.50351	0.712407
TCGA-14-0790	0.269675	0.59313	0.641645	0.605932	0.79014	0.75539	0.371158	0.645663	0.439683	0.720865	0.703821	0.479852	0.39604	0.852712	0.546129	0.711563	0.225965	0.750337	0.562875	0.640856	0.622933	0.436985	0.666942
TCGA-19-4065-1	0.293244	0.700969	0.669472	0.682925	0.756775	0.846456	0.429073	0.777181	0.444753	0.787178	0.886459	0.666927	0.524225	0.832351	0.603829	0.761389	0.247432	0.771359	0.827097	0.72672	0.675381	0.552755	0.717417
TCGA-28-2509	0.219661	0.684031	0.660066	0.635804	0.784884	0.766046	0.449641	0.702124	0.499214	0.795653	0.84355	0.616319	0.581236	0.853838	0.588502	0.733571	0.28909	0.773929	0.717554	0.739627	0.616506	0.471883	0.653749
TCGA-06-0210	0.393022	0.704031	0.766527	0.71265	0.780756	0.807903	0.439349	0.761965	0.58837	0.800264	0.922498	0.680126	0.608312	0.893763	0.629127	0.801844	0.316597	0.817197	0.792805	0.75505	0.69516	0.522009	0.704646
TCGA-12-0616	0.386373	0.709517	0.757573	0.626548	0.795253	0.751233	0.448463	0.72871	0.537544	0.755791	0.835423	0.593769	0.535514	0.860513	0.555513	0.723911	0.280889	0.769422	0.678969	0.714792	0.644423	0.417795	0.69231
TCGA-76-4929	0.228239	0.58114	0.620445	0.667965	0.77619	0.769028	0.419183	0.740473	0.463515	0.746609	0.802731	0.55637	0.486701	0.868603	0.552218	0.724922	0.293105	0.796835	0.753726	0.693767	0.597706	0.487592	0.644354
TCGA-06-2567	0.373083	0.720066	0.747142	0.717722	0.786541	0.813687	0.454389	0.762811	0.546742	0.768792	0.882113	0.630632	0.602149	0.895526	0.638741	0.777371	0.485604	0.838556	0.750778	0.742514	0.669795	0.53038	0.637898
TCGA-14-0789	0.2889	0.637578	0.711212	0.738723	0.786076	0.777985	0.447823	0.770171	0.580271	0.823378	0.924686	0.682117	0.624929	0.866667	0.602799	0.791429	0.419712	0.824184	0.845844	0.783129	0.705973	0.522223	0.680944
TCGA-28-5213	0.385993	0.699381	0.767114	0.76705	0.787628	0.771138	0.466242	0.773171	0.548191	0.821389	0.932148	0.698036	0.636188	0.876393	0.603537	0.762552	0.528928	0.812331	0.810948	0.753291	0.690843	0.539402	0.670543
TCGA-06-2569	0.218948	0.604048	0.594073	0.545113	0.72015	0.756934	0.460626	0.631278	0.281743	0.741238	0.669249	0.51267	0.455081	0.800687	0.526508	0.647202	0.25343	0.737935	0.622932	0.606006	0.557556	0.484513	0.689242
TCGA-06-0882	0.360234	0.597852	0.676973	0.661064	0.752142	0.834922	0.477382	0.735047	0.517465	0.786836	0.887194	0.661195	0.549463	0.878552	0.612166	0.78183	0.395681	0.817984	0.734296	0.734341	0.665628	0.552825	0.654005
TCGA-27-1832	0.374294	0.716694	0.767555	0.641258	0.763339	0.764992	0.495616	0.703727	0.516582	0.812486	0.922089	0.632373	0.602595	0.875261	0.592065	0.783579	0.38751	0.800474	0.709703	0.741594	0.668075	0.504624	0.688905
TCGA-26-1442	0.288478	0.446094	0.549495	0.55317	0.741211	0.825776	0.449961	0.630492	0.412368	0.710581	0.698678	0.527366	0.474775	0.862672	0.509112	0.677816	0.171048	0.742518	0.581943	0.647187	0.590274	0.494843	0.569561
TCGA-14-2554	0.390063	0.667636	0.73302	0.693741	0.771235	0.803889	0.463097	0.694868	0.52816	0.758753	0.873814	0.637971	0.562036	0.858784	0.579469	0.749323	0.386466	0.781293	0.700093	0.73578	0.656805	0.51063	0.655029
TCGA-16-1045	0.384159	0.651665	0.720832	0.72193	0.791669	0.768477	0.48578	0.808878	0.555367	0.807196	0.925961	0.669835	0.596944	0.879505	0.623324	0.804771	0.385526	0.819974	0.841892	0.776781	0.690395	0.545551	0.680329
TCGA-06-2561	0.305128	0.640822	0.705905	0.704083	0.769121	0.789762	0.472274	0.684849	0.537391	0.768998	0.877821	0.627107	0.558609	0.858759	0.570079	0.772737	0.322971	0.799256	0.746684	0.72402	0.663129	0.533457	0.667809
TCGA-06-0749	0.338866	0.558252	0.676778	0.675081	0.772965	0.801271	0.479164	0.675717	0.497834	0.779327	0.878572	0.635225	0.543018	0.880419	0.550845	0.75073	0.276688	0.785683	0.646164	0.719925	0.64938	0.481522	0.630568
TCGA-76-4928	0.254028	0.70191	0.666152	0.685598	0.777945	0.781315	0.401118	0.747604	0.498733	0.790046	0.871554	0.618214	0.524627	0.864028	0.583418	0.76195	0.412383	0.80224	0.797936	0.752745	0.684642	0.508749	0.69438
TCGA-06-0156-1	0.409585	0.739833	0.708732	0.735186	0.7584	0.802484	0.432814	0.824041	0.491372	0.790488	0.885737	0.65742	0.57563	0.847875	0.58551	0.767621	0.456146	0.819359	0.810351	0.721648	0.671558	0.512743	0.679707
TCGA-14-0787	0.303753	0.679926	0.667766	0.678541	0.775756	0.813098	0.423364	0.741805	0.475297	0.783678	0.854477	0.614141	0.514989	0.85328	0.594048	0.746574	0.286413	0.767595	0.721205	0.718469	0.628614	0.500021	0.650706
TCGA-06-0152	0.486159	0.769457	0.792223	0.705619	0.772627	0.854213	0.482799	0.757021	0.577353	0.797282	0.903087	0.636226	0.555542	0.855996	0.618682	0.75499	0.366022	0.797081	0.791072	0.752777	0.714748	0.523467	0.732933
TCGA-06-5410	0.486701	0.703438	0.744876	0.773272	0.769286	0.829681	0.496197	0.836414	0.605504	0.853495	0.981094	0.751656	0.738067	0.919476	0.660766	0.824542	0.593553	0.85799	0.881592	0.820152	0.734946	0.599841	0.681816
TCGA-26-5136	0.416356	0.695469	0.731142	0.683176	0.772581	0.760615	0.429197	0.745683	0.517453	0.760914	0.891166	0.59751	0.514026	0.860914	0.572964	0.753833	0.219894	0.794263	0.694212	0.703633	0.616221	0.484247	0.660456
TCGA-41-5651	0.278917	0.647829	0.647139	0.595419	0.772913	0.769214	0.381796	0.668351	0.41083	0.718493	0.731697	0.491769	0.470958	0.837029	0.520293	0.708069	0.252992	0.762235	0.667643	0.633921	0.600238	0.426159	0.697453
TCGA-19-1389	0.240525	0.686874	0.670799	0.72068	0.782579	0.773708	0.507953	0.804879	0.540576	0.836986	0.936212	0.701493	0.639046	0.859709	0.684507	0.79732	0.414258	0.813125	0.855501	0.758108	0.699968	0.563781	0.708135
TCGA-26-5132	0.288565	0.67671	0.696184	0.632049	0.773756	0.797894	0.398343	0.742401	0.468373	0.762191	0.809816	0.56948	0.559112	0.873418	0.595392	0.745734	0.204961	0.798632	0.705179	0.704282	0.621471	0.48793	0.637528
TCGA-06-0646	0.334902	0.694185	0.658509	0.723417	0.759091	0.834248	0.532983	0.700312	0.51979	0.765031	0.885626	0.638125	0.584967	0.883319	0.571865	0.752579	0.368386	0.789231	0.729244	0.723388	0.665901	0.501861	0.679815
TCGA-19-2620	0.253066	0.586371	0.583993	0.686617	0.765215	0.805922	0.412821	0.702903	0.428283	0.765237	0.801978	0.592236	0.49045	0.861649	0.570551	0.775616	0.309724	0.791143	0.673831	0.679317	0.618404	0.501211	0.654091
TCGA-06-0210-1	0.327802	0.666783	0.689589	0.727548	0.773059	0.785839	0.419477	0.769355	0.540521	0.800279	0.887253	0.638297	0.622152	0.887333	0.608231	0.774269	0.493983	0.83445	0.802544	0.707466	0.672397	0.523932	0.668989
TCGA-27-1835	0.272917	0.55293	0.648273	0.600694	0.711247	0.785923	0.414313	0.647306	0.350488	0.708349	0.710243	0.475441	0.422929	0.779861	0.55283	0.676768	0.236055	0.781392	0.599406	0.612514	0.574722	0.495954	0.65468
TCGA-76-4925	0.157574	0.644197	0.617048	0.623979	0.72648	0.782027	0.354686	0.711131	0.407576	0.74552	0.743028	0.52756	0.470951	0.836682	0.544302	0.708373	0.267038	0.760951	0.646404	0.617978	0.576069	0.49785	0.650971
TCGA-06-2557	0.551046	0.738036	0.783542	0.717666	0.77951	0.804097	0.465065	0.737623	0.653603	0.773993	0.920154	0.664853	0.61861	0.880429	0.588458	0.793534	0.301929	0.817587	0.725917	0.767622	0.688308	0.497391	0.725742
TCGA-14-1034	0.304534	0.670783	0.696519	0.685362	0.783167	0.77276	0.454543	0.749283	0.539525	0.806276	0.88984	0.660005	0.596321	0.870045	0.6352	0.778173	0.411168	0.795003	0.780211	0.734562	0.658735	0.564812	0.720615
TCGA-27-2519	0.392894	0.681578	0.743309	0.672078	0.774981	0.752892	0.517236	0.795534	0.524576	0.775719	0.898163	0.650154	0.539135	0.869551	0.618616	0.761614	0.332397	0.784867	0.798089	0.749131	0.656247	0.542154	0.692855
TCGA-26-5139	0.304836	0.66839	0.661598	0.649367	0.756941	0.8133	0.407116	0.703531	0.465327	0.786666	0.846036	0.612203	0.572052	0.850637	0.587099	0.757081	0.289518	0.774753	0.694004	0.698158	0.659094	0.514012	0.655857
TCGA-28-2510	0.297274	0.608188	0.623257	0.653671	0.727844	0.824656	0.452443	0.6843	0.424247	0.772651	0.805162	0.584001	0.534208	0.855155	0.549888	0.756794	0.320222	0.781449	0.712677	0.673751	0.643651	0.498491	0.658299
TCGA-06-0221	0.326172	0.628304	0.563616	0.584534	0.747628	0.796923	0.402049	0.69318	0.393741	0.71222	0.702123	0.530266	0.478912	0.839534	0.525226	0.721305	0.302799	0.762465	0.610531	0.662704	0.584858	0.476004	0.663675
TCGA-27-2526	0.406172	0.644785	0.826386	0.641684	0.766221	0.728067	0.444292	0.702068	0.559237	0.799342	0.844572	0.596056	0.499451	0.849934	0.54821	0.7306	0.295209	0.769995	0.674845	0.719911	0.66077	0.538308	0.684752
TCGA-14-1034-1	0.228529	0.611947	0.558016	0.633328	0.715569	0.753709	0.41391	0.658112	0.440209	0.777562	0.705137	0.496658	0.462761	0.809737	0.546166	0.686115	0.197973	0.764152	0.635773	0.614253	0.575238	0.447885	0.630182
TCGA-06-5858	0.300627	0.685359	0.584831	0.659735	0.737919	0.806575	0.441531	0.743186	0.463939	0.755183	0.832854	0.609394	0.544739	0.861909	0.566271	0.774132	0.328441	0.794515	0.736981	0.718961	0.611845	0.502912	0.662719
TCGA-06-0211-1	0.459431	0.722316	0.751464	0.747842	0.772203	0.812298	0.474708	0.789532	0.536731	0.7999	0.904484	0.696938	0.648216	0.873334	0.634721	0.769092	0.485483	0.810972	0.801027	0.758055	0.678254	0.566485	0.683484
TCGA-16-0846	0.41451	0.675349	0.75908	0.65688	0.808239	0.843099	0.433099	0.698865	0.604677	0.74742	0.873788	0.584854	0.516188	0.877996	0.589729	0.775913	0.262273	0.776516	0.64201	0.722559	0.669029	0.544477	0.701436
TCGA-06-0157	0.348265	0.660761	0.722097	0.649848	0.798347	0.802462	0.411809	0.689332	0.51152	0.757543	0.856022	0.592511	0.494781	0.878173	0.568753	0.751957	0.394607	0.790383	0.698344	0.705805	0.650423	0.51339	0.697352
TCGA-28-5209	0.27218	0.655177	0.60087	0.63688	0.754583	0.762629	0.427304	0.718905	0.39401	0.737321	0.77035	0.538715	0.482185	0.821718	0.567655	0.73315	0.248688	0.758168	0.642932	0.687089	0.611783	0.495525	0.682679
TCGA-41-4097	0.365115	0.643657	0.724435	0.680845	0.769264	0.82496	0.396632	0.748301	0.518692	0.792021	0.892342	0.61576	0.581248	0.875893	0.615596	0.776776	0.388447	0.832336	0.824406	0.728271	0.694501	0.559157	0.68794
TCGA-14-0817	0.408493	0.726143	0.767701	0.696189	0.780486	0.799375	0.472739	0.704441	0.587088	0.779154	0.905295	0.670156	0.583026	0.883571	0.599395	0.752643	0.371089	0.793207	0.732571	0.778484	0.683749	0.525928	0.661776
TCGA-32-4213	0.380756	0.69898	0.741846	0.640323	0.801527	0.779841	0.442084	0.779341	0.564539	0.775835	0.913593	0.665112	0.587137	0.855879	0.588429	0.787188	0.388523	0.786372	0.824224	0.753805	0.698161	0.532849	0.687876
TCGA-28-5207	0.402016	0.652255	0.692846	0.609858	0.797545	0.800814	0.517663	0.735304	0.496129	0.740477	0.782129	0.589287	0.522714	0.853335	0.599513	0.758844	0.340789	0.783902	0.69304	0.696397	0.636922	0.513693	0.698387
TCGA-06-5859	0.34777	0.716917	0.737313	0.682696	0.793369	0.716136	0.517218	0.72134	0.5183	0.72866	0.841514	0.598528	0.552715	0.830854	0.55765	0.734002	0.35382	0.80615	0.669683	0.703869	0.645263	0.467537	0.713363
TCGA-06-2563	0.305138	0.648537	0.69359	0.637106	0.746824	0.821509	0.447853	0.685591	0.493312	0.755691	0.794528	0.565173	0.506864	0.828819	0.575272	0.748386	0.365488	0.783298	0.678963	0.690072	0.641386	0.519809	0.683956
TCGA-14-0871	0.179538	0.650775	0.540553	0.558529	0.730713	0.755863	0.392364	0.681573	0.397899	0.745065	0.738903	0.493719	0.45475	0.752461	0.539032	0.698281	0.199336	0.723973	0.615047	0.599459	0.598581	0.409334	0.697384
TCGA-06-0686	0.291242	0.665128	0.609273	0.627809	0.764113	0.820202	0.416821	0.741637	0.437034	0.773281	0.799461	0.610355	0.562802	0.86336	0.555941	0.746564	0.325287	0.769921	0.733651	0.698242	0.62977	0.495739	0.697866
TCGA-06-0138	0.308541	0.694464	0.727053	0.665878	0.796839	0.79783	0.505474	0.743507	0.50146	0.771909	0.879909	0.638305	0.583994	0.884162	0.603377	0.753074	0.402298	0.78621	0.750756	0.720457	0.655505	0.497358	0.680318
TCGA-12-3653	0.264727	0.679216	0.688204	0.650948	0.743503	0.746215	0.430279	0.697507	0.545029	0.727552	0.831271	0.573749	0.454574	0.841812	0.563295	0.69319	0.320605	0.795026	0.651854	0.719233	0.63774	0.463353	0.643137
TCGA-32-1982	0.385107	0.672582	0.795774	0.656033	0.770955	0.828767	0.511979	0.717484	0.503608	0.766331	0.892989	0.617982	0.58921	0.856984	0.616139	0.764895	0.467851	0.831163	0.725966	0.728638	0.675318	0.50698	0.654429
TCGA-06-0190-1	0.343575	0.747131	0.747729	0.753517	0.787368	0.784169	0.508827	0.764486	0.548109	0.798668	0.91695	0.671297	0.675799	0.87557	0.618058	0.801227	0.516233	0.822879	0.823108	0.77449	0.707581	0.564416	0.712511
TCGA-02-2483	0.339158	0.73681	0.698258	0.67191	0.767302	0.796757	0.462103	0.71481	0.48602	0.755363	0.851039	0.618938	0.543497	0.844072	0.583758	0.741111	0.461248	0.775813	0.764821	0.709863	0.622456	0.51868	0.684944
TCGA-14-1829	0.352672	0.693268	0.740564	0.69391	0.769766	0.734518	0.481956	0.759247	0.55678	0.769027	0.859325	0.616326	0.573129	0.863606	0.567127	0.742391	0.374979	0.764041	0.735557	0.740435	0.641815	0.465721	0.678008
TCGA-06-0238	0.386403	0.721181	0.724256	0.671545	0.791727	0.804621	0.457073	0.771926	0.553369	0.776431	0.862137	0.663193	0.636632	0.864102	0.567621	0.75769	0.256615	0.789902	0.73945	0.751568	0.653309	0.477231	0.699283
TCGA-28-2513	0.416894	0.660081	0.727428	0.725396	0.778804	0.795941	0.438045	0.774123	0.546063	0.816391	0.920809	0.695771	0.630286	0.886315	0.610836	0.789401	0.41651	0.800751	0.798083	0.758947	0.699306	0.539382	0.661916
TCGA-27-2521	0.229264	0.646402	0.568675	0.611126	0.772691	0.748834	0.393021	0.65778	0.412613	0.729651	0.724407	0.57454	0.509336	0.846059	0.545248	0.679886	0.273066	0.74931	0.657874	0.667738	0.590133	0.445878	0.660652
TCGA-02-2485	0.318725	0.675211	0.703366	0.599728	0.79328	0.771942	0.499755	0.676525	0.491499	0.726152	0.767477	0.548348	0.500467	0.856946	0.602179	0.737873	0.26685	0.773293	0.612099	0.684274	0.626697	0.495418	0.701156
TCGA-06-2558	0.357247	0.65245	0.689336	0.661383	0.785241	0.83287	0.432874	0.726836	0.491695	0.770606	0.820678	0.590419	0.5596	0.861315	0.57525	0.76801	0.365069	0.780366	0.727565	0.697959	0.6399	0.5242	0.687244
TCGA-06-5413	0.481408	0.724659	0.753253	0.683878	0.802097	0.775032	0.432461	0.818304	0.579095	0.797426	0.879413	0.688369	0.614257	0.862332	0.618819	0.769694	0.45735	0.798486	0.805934	0.745457	0.691644	0.513682	0.702905
TCGA-19-0957	0.325947	0.65644	0.677097	0.659517	0.755421	0.786626	0.41544	0.743	0.484771	0.772568	0.858906	0.62763	0.581342	0.858312	0.564444	0.759313	0.187724	0.786011	0.777159	0.708325	0.640941	0.50042	0.694802
TCGA-19-1787	0.349259	0.711735	0.688857	0.611951	0.75898	0.802804	0.412017	0.699847	0.543624	0.770984	0.850241	0.597807	0.480921	0.878039	0.551544	0.758355	0.241501	0.771489	0.668279	0.728113	0.635926	0.493232	0.646412
TCGA-06-1804	0.357785	0.523787	0.600145	0.606578	0.745392	0.807682	0.376302	0.6631	0.448564	0.726629	0.797388	0.567009	0.432853	0.863191	0.536746	0.728428	0.424032	0.815774	0.59589	0.665977	0.607494	0.505098	0.596062
TCGA-06-5416	0.231204	0.661064	0.626731	0.634124	0.728428	0.762543	0.429139	0.688359	0.409727	0.757899	0.697045	0.483995	0.474838	0.817579	0.541481	0.675943	0.113974	0.738102	0.663421	0.633065	0.603549	0.439602	0.654339
TCGA-26-5133	0.344315	0.588878	0.626556	0.540608	0.727376	0.763897	0.444665	0.648686	0.420185	0.722445	0.693618	0.539998	0.48922	0.840933	0.529493	0.675499	0.184503	0.774537	0.633502	0.683914	0.6106	0.44419	0.646302
TCGA-06-0130	0.449259	0.776564	0.858205	0.727103	0.796094	0.79276	0.497029	0.816443	0.646872	0.798414	0.976717	0.710925	0.65697	0.895298	0.667565	0.803474	0.413798	0.818862	0.855616	0.79289	0.728192	0.532416	0.715147
TCGA-27-2528	0.271071	0.617779	0.618205	0.613959	0.759132	0.786909	0.429063	0.699084	0.39132	0.748159	0.726629	0.550366	0.488656	0.820517	0.601755	0.748641	0.308301	0.762691	0.675308	0.660123	0.637496	0.453632	0.662625
TCGA-12-1597	0.243554	0.636659	0.641386	0.621137	0.777977	0.770387	0.471028	0.658141	0.404872	0.737139	0.779754	0.570691	0.483631	0.865161	0.535941	0.726664	0.249485	0.76861	0.656368	0.710295	0.601023	0.461449	0.6596
TCGA-06-0187	0.300443	0.671663	0.654792	0.674696	0.765529	0.802875	0.433435	0.740903	0.53358	0.772707	0.858771	0.612107	0.594905	0.851941	0.62004	0.761274	0.43362	0.798932	0.754838	0.730759	0.647405	0.536461	0.648874
TCGA-06-0178	0.389112	0.688836	0.724907	0.706808	0.789397	0.74758	0.439751	0.715265	0.516617	0.760369	0.836196	0.63257	0.516217	0.852512	0.55688	0.711252	0.357508	0.766448	0.731614	0.718723	0.613095	0.476141	0.675094
TCGA-27-2523	0.317747	0.645678	0.656132	0.593345	0.734378	0.798402	0.414132	0.703378	0.455346	0.722311	0.778072	0.539881	0.471824	0.844775	0.543276	0.725027	0.215633	0.760891	0.654972	0.687294	0.60399	0.488268	0.660501
TCGA-06-0141	0.416906	0.672574	0.765087	0.751317	0.774837	0.797589	0.435468	0.819447	0.577027	0.829917	0.93782	0.704495	0.612879	0.904371	0.647898	0.797661	0.562741	0.838963	0.874299	0.770315	0.699006	0.567314	0.663826
TCGA-28-5220	0.382809	0.652829	0.714137	0.630708	0.804397	0.775148	0.414115	0.71266	0.504142	0.746793	0.796343	0.605568	0.488654	0.872966	0.557492	0.726978	0.27175	0.784498	0.605429	0.66474	0.608086	0.463351	0.670008
TCGA-28-2514	0.318688	0.623817	0.589827	0.641597	0.757993	0.809513	0.443291	0.688449	0.44499	0.772512	0.770552	0.553066	0.473489	0.852774	0.589015	0.743509	0.334891	0.786285	0.630057	0.69144	0.633953	0.5103	0.666502
TCGA-28-5204	0.374654	0.69259	0.692552	0.650092	0.761549	0.778485	0.431435	0.700656	0.565338	0.753364	0.803156	0.59211	0.485518	0.834618	0.592335	0.746286	0.309365	0.794612	0.671093	0.703751	0.644659	0.497231	0.692707
TCGA-28-5218	0.511694	0.752586	0.846089	0.636844	0.7553	0.815642	0.471878	0.82122	0.602084	0.768708	0.925456	0.692197	0.683669	0.885562	0.640613	0.791826	0.399362	0.809773	0.842256	0.713056	0.724637	0.4867	0.724586
TCGA-06-0211-2	0.358114	0.709893	0.673665	0.756024	0.760824	0.776172	0.435309	0.767673	0.502804	0.804303	0.874952	0.641085	0.586003	0.855896	0.608005	0.745451	0.47855	0.818171	0.787257	0.737294	0.66696	0.537486	0.676614
TCGA-06-0168	0.285276	0.701771	0.685779	0.660177	0.777175	0.847651	0.460127	0.784231	0.529021	0.783282	0.910418	0.648949	0.662906	0.875311	0.637041	0.783717	0.347787	0.771249	0.772848	0.749822	0.680308	0.523622	0.706501
TCGA-06-2570	0.332387	0.64358	0.622107	0.632783	0.803245	0.812723	0.447528	0.689704	0.509157	0.759953	0.859269	0.61462	0.538689	0.873708	0.560542	0.746599	0.414073	0.780719	0.715138	0.697761	0.632167	0.526419	0.66262
TCGA-32-2638	0.359567	0.663464	0.68251	0.696666	0.763581	0.809776	0.439775	0.741995	0.532113	0.795766	0.885024	0.608746	0.565898	0.867927	0.633418	0.775282	0.331321	0.794137	0.744221	0.738225	0.663746	0.49779	0.655107
TCGA-19-1390	0.208613	0.676697	0.496968	0.615917	0.707835	0.718509	0.393848	0.686238	0.401737	0.729888	0.723497	0.505166	0.441788	0.861956	0.485983	0.691885	0.303521	0.774125	0.649944	0.628273	0.57339	0.387821	0.648424
TCGA-HW-7491	0.316435	0.564987	0.570049	0.566325	0.728545	0.763971	0.474498	0.618706	0.40783	0.706597	0.666012	0.527547	0.41144	0.828314	0.502358	0.70587	0.435276	0.770874	0.586994	0.63021	0.560282	0.493014	0.615933
TCGA-VM-A8CD	0.346353	0.634846	0.640878	0.637527	0.75436	0.814635	0.459857	0.660085	0.541195	0.753673	0.813436	0.603723	0.502925	0.870615	0.597206	0.773716	0.353374	0.790395	0.669061	0.696532	0.654751	0.537285	0.705945
TCGA-S9-A7QY	0.325237	0.482723	0.536786	0.52245	0.727221	0.845921	0.387922	0.59933	0.306501	0.70944	0.606478	0.503234	0.41315	0.834044	0.51112	0.670167	0.164316	0.7619	0.53796	0.600176	0.570586	0.483171	0.571495
TCGA-FG-5965	0.282319	0.729382	0.674224	0.647283	0.75911	0.768246	0.498654	0.73098	0.478695	0.761787	0.802151	0.586126	0.517927	0.83804	0.575115	0.745691	0.152544	0.78252	0.678104	0.681867	0.621635	0.45992	0.687728
TCGA-HT-7475	0.25513	0.562335	0.555973	0.563599	0.730752	0.786666	0.419128	0.620617	0.344618	0.704178	0.666217	0.498618	0.448572	0.832341	0.501105	0.697332	0.414317	0.763657	0.545172	0.601898	0.574813	0.467781	0.625087
TCGA-HT-7473	0.52031	0.554087	0.687724	0.655315	0.746551	0.76423	0.525433	0.708322	0.55551	0.75907	0.886817	0.636444	0.56667	0.886134	0.553021	0.781784	0.289079	0.792146	0.71578	0.730892	0.648798	0.505667	0.614591
TCGA-DU-7292	0.314936	0.562775	0.572781	0.524776	0.742794	0.787632	0.407164	0.637561	0.394811	0.728269	0.645728	0.488887	0.452064	0.838722	0.542804	0.738176	0.201906	0.761457	0.596548	0.634491	0.627019	0.478656	0.67569
TCGA-DU-A5TT	0.325958	0.529776	0.591262	0.649183	0.766475	0.794079	0.514649	0.676596	0.435592	0.729573	0.741729	0.52331	0.498114	0.845837	0.557902	0.74132	0.343324	0.80898	0.626272	0.655716	0.606908	0.503398	0.626123
TCGA-HT-7874	0.254368	0.508473	0.510437	0.552822	0.724913	0.817717	0.479227	0.612407	0.375435	0.711115	0.639194	0.517893	0.439859	0.847654	0.506204	0.709015	0.332308	0.770019	0.55783	0.602787	0.589723	0.510526	0.605623
TCGA-HT-7471	0.410139	0.648413	0.64843	0.63057	0.745523	0.806035	0.442887	0.662363	0.45368	0.746854	0.778814	0.626933	0.467553	0.882418	0.563841	0.724704	0.269158	0.768919	0.703734	0.710056	0.620884	0.516562	0.663562
TCGA-DB-5274	0.354794	0.661394	0.712246	0.571713	0.75938	0.768001	0.483078	0.69368	0.464597	0.720191	0.793466	0.610807	0.609475	0.889205	0.546808	0.733444	0.385266	0.764334	0.709547	0.683421	0.592187	0.516088	0.656406
TCGA-S9-A7R7	0.407228	0.516774	0.693334	0.679554	0.75385	0.796847	0.472184	0.6929	0.488483	0.798957	0.869152	0.657937	0.557224	0.891891	0.583354	0.770529	0.345695	0.770294	0.702492	0.710838	0.653812	0.521569	0.606359
TCGA-S9-A6WG	0.443455	0.792801	0.703958	0.643444	0.766307	0.830744	0.554671	0.690877	0.524151	0.786222	0.849306	0.608338	0.635001	0.865164	0.61419	0.813233	0.503341	0.830394	0.668905	0.704315	0.683312	0.580161	0.708156
TCGA-HT-7691	0.390093	0.582635	0.66395	0.662724	0.764351	0.743808	0.570742	0.716934	0.514298	0.79392	0.826856	0.657087	0.623572	0.867126	0.587229	0.742323	0.392382	0.824103	0.668107	0.717019	0.666001	0.576082	0.61969
TCGA-HW-7487	0.254288	0.492619	0.48054	0.525604	0.729617	0.80332	0.461261	0.630628	0.347891	0.703111	0.632025	0.504147	0.440309	0.856853	0.475114	0.719926	0.22071	0.755875	0.575499	0.626234	0.575715	0.494424	0.592821
TCGA-E1-A7YJ	0.319295	0.596613	0.682315	0.665612	0.768755	0.773718	0.417276	0.673884	0.518512	0.751791	0.844603	0.59714	0.504982	0.860013	0.550425	0.77252	0.366767	0.817358	0.613571	0.700515	0.648511	0.497901	0.626771
TCGA-E1-A7YK	0.359037	0.559026	0.735144	0.656599	0.75877	0.803766	0.475376	0.669603	0.517048	0.790579	0.876637	0.630983	0.536595	0.890497	0.560229	0.780669	0.240482	0.789366	0.656369	0.698442	0.640215	0.52225	0.648816
TCGA-HT-7609	0.330744	0.533304	0.503174	0.59393	0.752014	0.739091	0.541759	0.582421	0.459923	0.737801	0.712213	0.555438	0.496136	0.861844	0.516563	0.745067	0.246207	0.772913	0.597032	0.654705	0.58007	0.488434	0.61881
TCGA-HT-A5RA	0.363007	0.687284	0.670479	0.655187	0.798391	0.755378	0.439814	0.710561	0.484517	0.752109	0.790618	0.533303	0.553322	0.849517	0.633382	0.764568	0.346238	0.791641	0.674443	0.691616	0.671867	0.512049	0.715701
TCGA-S9-A6WL	0.279002	0.52638	0.50708	0.535925	0.753931	0.845142	0.40314	0.63312	0.359235	0.736727	0.651411	0.529566	0.401106	0.846304	0.565646	0.698849	0.242184	0.770829	0.623418	0.62723	0.597014	0.524885	0.627447
TCGA-S9-A6TZ	0.390779	0.52424	0.609072	0.582644	0.726935	0.778847	0.455753	0.649522	0.448587	0.712049	0.747471	0.568586	0.491977	0.821544	0.526295	0.742977	0.251871	0.774481	0.63251	0.683511	0.588425	0.504582	0.604165
TCGA-QH-A6XA	0.29637	0.54352	0.540286	0.550709	0.734706	0.780478	0.457914	0.644448	0.4191	0.709748	0.69254	0.502898	0.459629	0.865583	0.521837	0.678165	0.191028	0.765582	0.617823	0.649478	0.569193	0.503831	0.606246
TCGA-HT-7858	0.475872	0.656608	0.70889	0.651071	0.76393	0.737395	0.525305	0.68228	0.561087	0.755752	0.859046	0.607048	0.622008	0.856424	0.568791	0.764062	0.394809	0.81788	0.670992	0.699128	0.630071	0.50388	0.652437
TCGA-TQ-A7RH	0.31132	0.564093	0.589624	0.599815	0.73363	0.80524	0.46466	0.655098	0.4363	0.751989	0.764696	0.553319	0.462194	0.837272	0.519533	0.724757	0.267688	0.772199	0.633831	0.689565	0.592306	0.478757	0.620501
TCGA-DU-6403	0.31387	0.69838	0.651157	0.616967	0.762012	0.782136	0.435337	0.666926	0.499417	0.734524	0.792057	0.578449	0.48451	0.87277	0.557943	0.768534	0.192889	0.778414	0.648767	0.703567	0.621795	0.50604	0.705414
TCGA-E1-A7YL	0.32935	0.667132	0.732423	0.692665	0.794054	0.802842	0.42164	0.703956	0.438575	0.758712	0.881111	0.597766	0.524805	0.884814	0.604792	0.739005	0.277969	0.798914	0.665988	0.69271	0.651227	0.471598	0.678067
TCGA-FG-A4MX	0.2992	0.44479	0.517179	0.559377	0.738595	0.794964	0.423776	0.586779	0.301219	0.717019	0.642936	0.496816	0.436197	0.798215	0.466173	0.661534	0.184164	0.756574	0.529958	0.608711	0.544193	0.498297	0.554241
TCGA-DB-A4XD	0.231533	0.512938	0.506192	0.573177	0.730722	0.735416	0.488002	0.618044	0.330965	0.704566	0.673814	0.515185	0.431942	0.868019	0.534167	0.707554	0.225487	0.752771	0.590683	0.630338	0.549876	0.479499	0.622276
TCGA-VM-A8CF	0.376381	0.497027	0.638914	0.639043	0.751179	0.766576	0.495941	0.675215	0.47136	0.732408	0.843477	0.653186	0.549981	0.872669	0.561233	0.772364	0.27208	0.776046	0.636378	0.684814	0.602381	0.489089	0.546796
TCGA-DU-6394	0.331219	0.543524	0.547456	0.585963	0.736925	0.790585	0.424801	0.637063	0.422911	0.732679	0.672331	0.525443	0.431702	0.838205	0.508385	0.672494	0.33295	0.756232	0.618775	0.67447	0.590362	0.531553	0.609055
TCGA-HT-7692	0.268093	0.572011	0.57224	0.53635	0.729545	0.781059	0.469265	0.605268	0.376263	0.679848	0.649253	0.521633	0.428915	0.848719	0.507467	0.660231	0.146632	0.745444	0.546252	0.620364	0.549737	0.476032	0.644806
TCGA-DH-5141	0.294409	0.517731	0.617862	0.554116	0.741305	0.805143	0.527373	0.695428	0.380076	0.740755	0.707657	0.562374	0.505277	0.896662	0.576229	0.718246	0.304287	0.765459	0.638776	0.679817	0.58849	0.527112	0.588668
TCGA-DB-A75L	0.270841	0.505995	0.501055	0.516854	0.752109	0.792762	0.455607	0.629395	0.34361	0.7351	0.709697	0.534436	0.48828	0.838579	0.499251	0.711513	0.214863	0.764258	0.623737	0.633792	0.576696	0.472791	0.638436
TCGA-HT-8558	0.303692	0.480996	0.506951	0.500729	0.697995	0.79477	0.505138	0.591219	0.392752	0.723925	0.597017	0.462796	0.435783	0.848667	0.507762	0.698344	0.142367	0.748679	0.564997	0.610173	0.597939	0.494709	0.589147
TCGA-RY-A843	0.292315	0.56671	0.531626	0.552183	0.727812	0.770678	0.489811	0.615162	0.375607	0.682435	0.668524	0.4889	0.471378	0.856865	0.523163	0.706003	0.18271	0.757804	0.568428	0.643781	0.564907	0.503454	0.639784
TCGA-HT-A74O	0.436042	0.613171	0.722582	0.650177	0.763238	0.810841	0.452191	0.701207	0.545392	0.765458	0.871584	0.636433	0.527006	0.901326	0.578379	0.767814	0.260941	0.77324	0.642752	0.719236	0.615606	0.494273	0.660724
TCGA-FG-A4MU	0.332809	0.677692	0.672091	0.679019	0.764446	0.803676	0.465867	0.69492	0.485069	0.766521	0.864928	0.619823	0.546364	0.862445	0.579019	0.773469	0.338996	0.8019	0.716125	0.719729	0.656804	0.506841	0.668319
TCGA-DB-A64S	0.42345	0.610396	0.62645	0.636446	0.767217	0.801178	0.551713	0.677626	0.442698	0.771666	0.827277	0.645682	0.597486	0.887309	0.54407	0.758065	0.273531	0.783847	0.679219	0.701132	0.617721	0.496343	0.647509
TCGA-FG-A6J3	0.373355	0.683007	0.785542	0.644165	0.8019	0.771811	0.557447	0.64782	0.5713	0.761443	0.897546	0.678351	0.571578	0.907152	0.611798	0.735304	0.331993	0.79317	0.700239	0.727056	0.644199	0.495879	0.671836
TCGA-QH-A6X9	0.29049	0.558886	0.534846	0.517653	0.723795	0.800133	0.428298	0.591498	0.355266	0.709912	0.631842	0.488425	0.399303	0.83368	0.505027	0.695269	0.192706	0.751517	0.582569	0.625543	0.55854	0.509697	0.620035
TCGA-S9-A7R4	0.308221	0.54962	0.517283	0.599846	0.738749	0.796562	0.519146	0.636097	0.443065	0.744718	0.741983	0.593191	0.562307	0.861427	0.548195	0.766157	0.265093	0.803097	0.700799	0.706064	0.612464	0.53524	0.648279
TCGA-HT-7695	0.300115	0.558112	0.557898	0.543271	0.73205	0.81108	0.451468	0.632206	0.388846	0.708457	0.610668	0.523816	0.421988	0.869798	0.497435	0.707563	0.144383	0.753567	0.573976	0.632998	0.591421	0.489353	0.630977
TCGA-DU-A5TY	0.417347	0.626759	0.730606	0.682722	0.785958	0.831273	0.484691	0.723689	0.566022	0.798458	0.893998	0.670033	0.531864	0.878963	0.608972	0.76735	0.323742	0.826861	0.696302	0.733812	0.671027	0.528103	0.703263
TCGA-S9-A89V	0.296049	0.503545	0.636772	0.58734	0.730533	0.780484	0.459746	0.622844	0.469173	0.755688	0.71336	0.501944	0.496956	0.845627	0.507402	0.769599	0.216857	0.780613	0.572226	0.6686	0.625441	0.496292	0.6032
TCGA-FG-A4MT	0.341165	0.619676	0.565186	0.579413	0.751709	0.783085	0.512683	0.64717	0.418424	0.727178	0.70984	0.521558	0.486318	0.854587	0.541973	0.710003	0.157001	0.766739	0.593947	0.660911	0.608255	0.493227	0.657409
TCGA-DU-7290	0.381085	0.666934	0.722797	0.696735	0.781345	0.769347	0.613063	0.704412	0.552708	0.818231	0.874304	0.593683	0.579238	0.885842	0.575036	0.782324	0.292297	0.819724	0.6722	0.738658	0.67102	0.535382	0.706612
TCGA-DU-A5TW	0.218789	0.526071	0.476346	0.552419	0.738845	0.765384	0.4742	0.620618	0.353827	0.752636	0.696396	0.513375	0.410153	0.848877	0.509565	0.687681	0.297733	0.7718	0.598552	0.621588	0.530196	0.455834	0.626817
TCGA-DB-5279	0.316145	0.518715	0.700559	0.621282	0.733768	0.764222	0.517273	0.665391	0.449437	0.742846	0.748308	0.587114	0.563977	0.825938	0.538193	0.69509	0.482928	0.794513	0.639232	0.655386	0.623526	0.503797	0.589225
TCGA-E1-A7YE	0.324334	0.642202	0.632831	0.663094	0.763309	0.794639	0.579685	0.654889	0.45753	0.816253	0.854724	0.62744	0.575477	0.865242	0.548583	0.74634	0.274744	0.800773	0.677764	0.719716	0.641477	0.53417	0.67683
TCGA-TM-A84F	0.49962	0.65399	0.795217	0.665887	0.755752	0.84947	0.52195	0.665854	0.556021	0.757645	0.854395	0.618281	0.555424	0.885685	0.565582	0.76064	0.299668	0.784778	0.65421	0.738343	0.687058	0.558731	0.664333
TCGA-S9-A6WP	0.332715	0.590415	0.652806	0.61198	0.745586	0.805122	0.441496	0.674271	0.437388	0.729031	0.7659	0.575179	0.4233	0.880191	0.573576	0.721625	0.245883	0.779974	0.601725	0.698156	0.591937	0.48712	0.634928
TCGA-DU-A6S2	0.304091	0.511037	0.569392	0.567608	0.712732	0.784373	0.495099	0.59098	0.339261	0.715856	0.657465	0.495037	0.472048	0.849692	0.522201	0.715482	0.314153	0.779064	0.517584	0.638722	0.609649	0.49354	0.589665
TCGA-QH-A6X8	0.336935	0.536887	0.579319	0.537636	0.741297	0.775381	0.441706	0.632524	0.357558	0.727678	0.70505	0.562738	0.455306	0.835047	0.523814	0.704622	0.199924	0.751374	0.573394	0.670647	0.557625	0.475535	0.634487
TCGA-DU-5854	0.400401	0.614337	0.704722	0.610019	0.746045	0.764349	0.444257	0.676812	0.521515	0.76666	0.816478	0.587057	0.526496	0.868628	0.611151	0.79935	0.354503	0.822402	0.639255	0.693045	0.660299	0.518764	0.678025
TCGA-TM-A84O	0.394938	0.534445	0.64241	0.588016	0.768123	0.786426	0.460055	0.611302	0.482263	0.740533	0.696503	0.500024	0.424608	0.858754	0.533413	0.706885	0.117404	0.762805	0.601207	0.656957	0.631226	0.44967	0.661583
TCGA-DB-5278	0.326655	0.512002	0.590121	0.569684	0.747866	0.821372	0.466178	0.648076	0.386951	0.721624	0.707793	0.535536	0.452002	0.876957	0.52557	0.693081	0.268804	0.768939	0.615663	0.663424	0.612059	0.494868	0.614266
TCGA-HT-8109	0.31821	0.576271	0.572502	0.558506	0.727807	0.787046	0.452299	0.629779	0.355332	0.694587	0.659039	0.508893	0.452661	0.851702	0.50321	0.714277	0.213433	0.762903	0.607339	0.632812	0.600668	0.469157	0.630057
TCGA-DU-7294	0.266616	0.570147	0.570049	0.512821	0.718394	0.810999	0.460719	0.60602	0.378195	0.691306	0.668458	0.536494	0.403034	0.828832	0.510326	0.685227	0.303769	0.763084	0.590541	0.633915	0.560234	0.446739	0.63381
TCGA-FG-5962	0.337683	0.559922	0.578513	0.537077	0.729113	0.812119	0.476205	0.602249	0.41001	0.708408	0.639502	0.526538	0.405052	0.851803	0.501619	0.666999	0.196784	0.751367	0.571499	0.608335	0.585755	0.512413	0.629588
TCGA-S9-A7IX	0.400403	0.607698	0.676499	0.665884	0.750521	0.823046	0.485807	0.681646	0.514035	0.774026	0.794358	0.599622	0.533754	0.878675	0.599185	0.767583	0.342835	0.810759	0.669056	0.713738	0.66566	0.551246	0.705803
TCGA-HT-8110	0.477721	0.680809	0.705696	0.68907	0.756381	0.770426	0.537816	0.705861	0.568071	0.779429	0.894263	0.607378	0.562376	0.89415	0.58735	0.770617	0.445725	0.819209	0.674947	0.722371	0.665579	0.554051	0.691188
TCGA-QH-A6X4	0.254054	0.470916	0.495434	0.485999	0.696663	0.815347	0.402869	0.589288	0.304198	0.677007	0.551511	0.499155	0.345824	0.853284	0.481702	0.659088	0.133001	0.749144	0.51531	0.588087	0.534054	0.423752	0.592019
TCGA-DB-A64V	0.34127	0.58039	0.733674	0.653705	0.758771	0.799607	0.46688	0.660889	0.49731	0.745254	0.815982	0.600697	0.495256	0.865484	0.580686	0.755779	0.26978	0.783884	0.671788	0.704562	0.627487	0.509843	0.643474
TCGA-TQ-A7RK	0.316593	0.606759	0.515063	0.556954	0.741561	0.761882	0.445974	0.642827	0.325989	0.730875	0.688001	0.534679	0.402734	0.839505	0.486302	0.721627	0.234639	0.761429	0.556869	0.647523	0.546667	0.464889	0.635965
TCGA-P5-A72U	0.551581	0.619218	0.775043	0.67568	0.784938	0.78153	0.446861	0.722341	0.594063	0.778766	0.876698	0.640334	0.640945	0.881046	0.65881	0.77791	0.448163	0.826679	0.687277	0.730028	0.679103	0.528567	0.675692
TCGA-TQ-A7RF	0.389323	0.480437	0.626968	0.560783	0.744493	0.791354	0.524719	0.613897	0.48107	0.697589	0.717286	0.54592	0.501495	0.805841	0.517621	0.718983	0.199019	0.772916	0.617258	0.642117	0.599166	0.478357	0.572624
TCGA-DU-5871	0.29854	0.50289	0.533531	0.601872	0.734306	0.790259	0.510119	0.633006	0.413045	0.72391	0.763557	0.579567	0.522645	0.865044	0.551962	0.738055	0.289687	0.788019	0.654756	0.681585	0.618251	0.50672	0.613697
TCGA-S9-A6TV	0.407602	0.586307	0.702299	0.657506	0.778881	0.79028	0.425455	0.704828	0.481393	0.801527	0.868143	0.656463	0.559988	0.859319	0.601156	0.747463	0.30237	0.772506	0.734538	0.737037	0.663954	0.517949	0.629296
TCGA-TM-A7C5	0.310054	0.591953	0.637175	0.554087	0.731111	0.799633	0.516179	0.644948	0.418604	0.705138	0.639114	0.494912	0.470052	0.816727	0.529854	0.673435	0.261761	0.74474	0.598247	0.619379	0.570705	0.486619	0.625993
TCGA-RY-A83Z	0.35525	0.597495	0.591833	0.605097	0.766532	0.772567	0.478823	0.617394	0.382976	0.711813	0.740957	0.539942	0.497852	0.872917	0.496094	0.668619	0.364298	0.741281	0.597959	0.5919	0.576172	0.492685	0.619358
TCGA-DU-7304	0.251108	0.516493	0.511593	0.495691	0.747382	0.797824	0.388485	0.630977	0.318798	0.667045	0.594412	0.423373	0.322364	0.836393	0.49213	0.65109	0.225788	0.732474	0.519816	0.568654	0.508494	0.488787	0.57909
TCGA-DH-5144	0.275234	0.542337	0.618657	0.565199	0.733315	0.780637	0.469986	0.643886	0.432695	0.697604	0.633858	0.511043	0.437806	0.844427	0.548695	0.678622	0.263991	0.751582	0.595642	0.651839	0.588988	0.504214	0.615922
TCGA-DH-A7UT	0.245691	0.455271	0.507884	0.580225	0.727657	0.832027	0.481451	0.597972	0.351363	0.7412	0.695726	0.537007	0.458038	0.87374	0.505646	0.733993	0.230182	0.764393	0.53428	0.649944	0.57379	0.490789	0.598838
TCGA-TQ-A8XE	0.281779	0.513868	0.558786	0.578712	0.714483	0.760646	0.499737	0.615196	0.448702	0.711827	0.695956	0.541439	0.458402	0.826399	0.490982	0.706846	0.264323	0.773192	0.623954	0.642379	0.540879	0.488161	0.611321
TCGA-DU-7006	0.376129	0.65432	0.743997	0.664908	0.775981	0.749857	0.464805	0.705079	0.566337	0.811997	0.855905	0.603454	0.507984	0.867419	0.598184	0.787922	0.347853	0.799316	0.732283	0.761938	0.678073	0.554391	0.71549
TCGA-P5-A733	0.287496	0.418175	0.527067	0.572135	0.72485	0.752097	0.476934	0.592567	0.434349	0.713702	0.668488	0.493378	0.45671	0.831396	0.523047	0.705473	0.301315	0.758673	0.551851	0.607565	0.570733	0.478929	0.583195
TCGA-FG-A87N	0.282515	0.629076	0.598598	0.609682	0.736353	0.803206	0.430339	0.638525	0.403457	0.745333	0.721673	0.535871	0.425421	0.860063	0.506958	0.666529	0.242348	0.757691	0.617011	0.652756	0.605172	0.462442	0.666361
TCGA-DH-A66B	0.446981	0.60611	0.692261	0.62558	0.790535	0.821623	0.499952	0.630809	0.549897	0.796885	0.8198	0.628283	0.558768	0.859671	0.544615	0.761045	0.275636	0.757129	0.664562	0.711782	0.617138	0.493179	0.644883
TCGA-S9-A6TS	0.327572	0.493657	0.532929	0.569584	0.755335	0.81035	0.464699	0.643373	0.397232	0.718798	0.736312	0.585583	0.449335	0.879842	0.501021	0.717824	0.233138	0.77227	0.654539	0.677508	0.583032	0.468028	0.611039
TCGA-DH-A669	0.344567	0.62058	0.696104	0.576524	0.778466	0.839975	0.469454	0.662158	0.521429	0.731759	0.731488	0.525355	0.439623	0.87116	0.559423	0.700306	0.288824	0.751118	0.661957	0.647428	0.608509	0.511471	0.6856
TCGA-E1-5302	0.367599	0.603726	0.623805	0.634583	0.774895	0.772554	0.531292	0.687619	0.48977	0.750925	0.768807	0.53801	0.546888	0.875029	0.563251	0.731959	0.161056	0.752141	0.614986	0.68163	0.64018	0.520596	0.668972
TCGA-S9-A7J3	0.277396	0.506701	0.547052	0.566641	0.717138	0.785469	0.469826	0.631655	0.360841	0.706501	0.68898	0.52276	0.45773	0.861933	0.523404	0.731858	0.283773	0.770736	0.560704	0.661042	0.589642	0.51354	0.605639
TCGA-HT-A617	0.463472	0.598214	0.749137	0.667553	0.773782	0.770977	0.483554	0.727651	0.553765	0.777551	0.821858	0.631949	0.561236	0.893535	0.580425	0.760489	0.200312	0.827605	0.672237	0.714346	0.679487	0.553049	0.672027
TCGA-DU-7011	0.43753	0.598908	0.657977	0.640711	0.770449	0.825327	0.513504	0.682816	0.521133	0.759978	0.838763	0.621174	0.570035	0.894639	0.598271	0.779923	0.319888	0.78401	0.685293	0.725484	0.664624	0.527314	0.672261
TCGA-FG-8181	0.301511	0.545194	0.575155	0.571602	0.726343	0.804611	0.553634	0.593982	0.392063	0.733481	0.65692	0.530434	0.524876	0.851873	0.527608	0.732324	0.270062	0.773158	0.593085	0.635035	0.634877	0.521864	0.605227
TCGA-FG-8182	0.286223	0.569022	0.557226	0.569835	0.735836	0.746447	0.49438	0.621275	0.406763	0.712479	0.749935	0.558228	0.540641	0.857473	0.526879	0.724939	0.277263	0.772982	0.62927	0.667603	0.562864	0.4832	0.638951
TCGA-TQ-A7RJ	0.337098	0.525631	0.540495	0.573688	0.742882	0.788243	0.469619	0.617863	0.400619	0.705136	0.721526	0.58208	0.472505	0.841338	0.508259	0.717589	0.208676	0.772254	0.59749	0.669181	0.598739	0.511585	0.609318
TCGA-FG-5963	0.25418	0.70141	0.604615	0.597748	0.75092	0.744836	0.538355	0.671167	0.42568	0.765805	0.728635	0.506159	0.466541	0.85008	0.53047	0.697453	0.325019	0.782866	0.631219	0.617142	0.602056	0.51047	0.693636
TCGA-TM-A84J	0.196671	0.622559	0.521189	0.560636	0.773784	0.810128	0.435403	0.615429	0.350875	0.706474	0.687649	0.506425	0.421236	0.799638	0.524202	0.664816	0.166064	0.707865	0.644795	0.633093	0.581983	0.465025	0.628209
TCGA-DU-7304-1	0.317274	0.60913	0.569902	0.626132	0.750197	0.799061	0.510802	0.653886	0.470267	0.751809	0.794041	0.610554	0.569367	0.850349	0.534962	0.754405	0.4206	0.803396	0.67196	0.678366	0.623028	0.535019	0.653266
TCGA-TQ-A7RN	0.217811	0.502348	0.482973	0.528815	0.735411	0.827233	0.414636	0.620439	0.329043	0.676258	0.615035	0.472333	0.342397	0.855638	0.488528	0.663821	0.178055	0.737796	0.569439	0.607741	0.543337	0.472287	0.596362
TCGA-QH-A6XC	0.339319	0.567623	0.601907	0.602954	0.737308	0.823002	0.445422	0.64441	0.415483	0.736148	0.695513	0.521556	0.530674	0.870691	0.571578	0.73909	0.212163	0.779333	0.593904	0.669056	0.621595	0.511832	0.650881
TCGA-HW-8320	0.322341	0.54382	0.552313	0.583687	0.746041	0.768609	0.514722	0.623317	0.454489	0.750365	0.731882	0.576006	0.54513	0.839102	0.538254	0.711053	0.369073	0.778874	0.616029	0.68062	0.594602	0.510866	0.611798
TCGA-E1-5307	0.306024	0.532904	0.458757	0.579713	0.747856	0.757183	0.515357	0.615225	0.410115	0.71537	0.669006	0.512542	0.469029	0.844191	0.518148	0.721496	0.233078	0.753185	0.60282	0.653603	0.585384	0.552366	0.68018
TCGA-FG-7634	0.307289	0.672197	0.680594	0.641546	0.743845	0.814851	0.498687	0.710253	0.477418	0.778507	0.834316	0.598224	0.543224	0.882875	0.575867	0.758483	0.311064	0.783773	0.730276	0.716074	0.621843	0.526445	0.688318
TCGA-S9-A7J2	0.240785	0.518212	0.489273	0.515198	0.706862	0.824281	0.394086	0.594026	0.289477	0.670773	0.63893	0.51946	0.404937	0.855818	0.515216	0.653293	0.224041	0.758743	0.555576	0.607572	0.523389	0.475029	0.553879
TCGA-QH-A86X	0.310383	0.558451	0.598874	0.524084	0.723717	0.818543	0.451789	0.631785	0.380815	0.711016	0.633491	0.518517	0.392578	0.853687	0.498766	0.674406	0.224793	0.747399	0.578496	0.63117	0.569743	0.472889	0.60445
TCGA-QH-A6CX	0.290841	0.514144	0.644901	0.586181	0.754053	0.759768	0.446668	0.663052	0.488456	0.755891	0.79076	0.569799	0.491425	0.872686	0.582503	0.76693	0.222715	0.809885	0.577546	0.68918	0.616596	0.502492	0.578446
TCGA-HT-8013	0.331042	0.593644	0.568608	0.614635	0.746884	0.80867	0.472482	0.664713	0.457065	0.763025	0.826775	0.606784	0.545779	0.886541	0.51559	0.709934	0.295219	0.769894	0.666409	0.704804	0.622218	0.531965	0.648996
TCGA-HT-7610	0.26675	0.56149	0.526229	0.536043	0.717281	0.786121	0.449599	0.607565	0.329349	0.701611	0.61874	0.508961	0.453684	0.863351	0.478744	0.681523	0.184841	0.74602	0.573701	0.631052	0.568557	0.482034	0.617525
TCGA-S9-A6U2	0.306971	0.535352	0.598994	0.559763	0.731401	0.764413	0.498242	0.620855	0.401663	0.700803	0.696853	0.547924	0.489557	0.847935	0.524576	0.717462	0.271627	0.767444	0.586413	0.64372	0.593746	0.515203	0.588642
TCGA-QH-A6CS	0.297924	0.492567	0.576313	0.599401	0.764289	0.772957	0.465366	0.65779	0.421515	0.733738	0.714468	0.564501	0.483476	0.877157	0.561691	0.727021	0.249583	0.80952	0.567952	0.651591	0.626227	0.541954	0.593491
TCGA-HT-8011	0.270282	0.651524	0.624787	0.60534	0.766361	0.791086	0.433208	0.681777	0.400152	0.722462	0.6568	0.503316	0.402842	0.837102	0.574901	0.702558	0.206065	0.783737	0.586949	0.654464	0.582453	0.494792	0.685267
TCGA-HT-7877	0.340007	0.532743	0.539797	0.549601	0.718505	0.81939	0.464359	0.615805	0.335908	0.707869	0.660812	0.523155	0.443993	0.861641	0.494452	0.700726	0.441831	0.777874	0.532734	0.604196	0.583524	0.50619	0.628516
TCGA-HT-7474	0.248527	0.485303	0.581633	0.565688	0.736915	0.79053	0.504703	0.617928	0.363099	0.724708	0.644286	0.501921	0.435686	0.867578	0.53274	0.740176	0.150234	0.750635	0.562676	0.632513	0.607231	0.524439	0.626815
TCGA-HT-8104	0.334858	0.62525	0.638105	0.599246	0.74425	0.801159	0.427058	0.674683	0.460936	0.731767	0.720912	0.540361	0.457551	0.871753	0.571918	0.790905	0.247058	0.778124	0.598801	0.680872	0.635195	0.479903	0.702811
TCGA-HT-8563	0.489933	0.686159	0.808015	0.732301	0.798554	0.779229	0.469917	0.748405	0.612323	0.800097	0.977314	0.708438	0.621758	0.886579	0.64762	0.811845	0.428823	0.820166	0.784603	0.784801	0.727798	0.544707	0.675787
TCGA-QH-A65R	0.321074	0.562853	0.557417	0.558889	0.752103	0.805308	0.490501	0.652537	0.406004	0.726377	0.667994	0.511841	0.569862	0.834893	0.520545	0.69266	0.24279	0.772079	0.601859	0.646113	0.577738	0.49623	0.606848
TCGA-P5-A780	0.296395	0.548318	0.604676	0.608472	0.750443	0.820828	0.488343	0.6367	0.427905	0.728288	0.709846	0.559857	0.559223	0.840353	0.555788	0.73725	0.195407	0.792851	0.623085	0.660132	0.605796	0.496771	0.637366
TCGA-E1-A7YY	0.306319	0.524734	0.496215	0.543311	0.723562	0.821194	0.477749	0.620317	0.358633	0.696576	0.628628	0.52844	0.428024	0.872265	0.51018	0.696109	0.107937	0.761259	0.594729	0.649489	0.609109	0.525273	0.604847
TCGA-DU-6393	0.266159	0.5782	0.53302	0.50565	0.727035	0.777669	0.416441	0.629164	0.334349	0.685192	0.563664	0.485975	0.35933	0.827793	0.477561	0.685373	0.169105	0.722399	0.528228	0.617177	0.550199	0.480706	0.635981
TCGA-R8-A73M	0.276341	0.512162	0.515658	0.475496	0.729517	0.825139	0.426727	0.587549	0.363367	0.644578	0.619327	0.477197	0.371026	0.834735	0.468953	0.61928	0.16707	0.731939	0.56055	0.614289	0.521767	0.447178	0.604278
TCGA-HT-7879	0.302584	0.499978	0.506681	0.578598	0.736382	0.780712	0.434721	0.634735	0.360289	0.716513	0.683588	0.541624	0.42753	0.866794	0.513063	0.719512	0.234538	0.753248	0.588302	0.646159	0.572182	0.529822	0.61825
TCGA-FN-7833	0.449901	0.646457	0.61543	0.637185	0.772022	0.782904	0.582996	0.67564	0.517044	0.776822	0.862256	0.660062	0.568245	0.868507	0.546368	0.748658	0.387602	0.796641	0.727824	0.728308	0.62333	0.545353	0.656429
TCGA-IK-7675	0.238035	0.546491	0.49132	0.570221	0.763736	0.722932	0.449101	0.631845	0.370903	0.7225	0.62453	0.490083	0.42275	0.868828	0.508006	0.713212	0.187664	0.744489	0.582082	0.666843	0.549795	0.437352	0.634905
TCGA-TM-A7C3	0.309625	0.513654	0.641232	0.584728	0.776575	0.786738	0.400661	0.652014	0.346621	0.714067	0.691153	0.45886	0.381596	0.835374	0.535854	0.689145	0.205596	0.767842	0.530729	0.630531	0.608007	0.432155	0.624436
TCGA-DU-8166	0.370696	0.58978	0.557829	0.622124	0.739704	0.792542	0.498189	0.63006	0.434774	0.741826	0.752833	0.570344	0.531643	0.866514	0.554615	0.75435	0.39806	0.792925	0.658198	0.680296	0.617899	0.533562	0.629277
TCGA-DU-6406	0.339849	0.640619	0.643258	0.597139	0.765564	0.780698	0.421748	0.655832	0.474205	0.728282	0.748537	0.544008	0.465983	0.841845	0.571627	0.733582	0.301233	0.778005	0.6239	0.700668	0.630426	0.507244	0.697192
TCGA-E1-A7YV	0.30164	0.662899	0.583983	0.556387	0.767746	0.753643	0.447508	0.624056	0.360763	0.715548	0.674886	0.496821	0.523888	0.818931	0.501676	0.685506	0.417366	0.781587	0.593006	0.601606	0.597898	0.501696	0.660713
TCGA-CS-5393	0.371173	0.499521	0.55685	0.588323	0.738089	0.784441	0.467802	0.633421	0.422799	0.741573	0.764994	0.581292	0.476051	0.850201	0.542717	0.712061	0.321061	0.767994	0.59391	0.681862	0.614059	0.535069	0.638884
TCGA-CS-6670	0.205875	0.541943	0.509623	0.496782	0.741588	0.818676	0.45188	0.622223	0.325051	0.67357	0.643555	0.503744	0.383699	0.860925	0.533739	0.692973	0.270749	0.746695	0.575174	0.644839	0.576231	0.498055	0.607988
TCGA-HT-7483	0.383657	0.598821	0.59815	0.557295	0.760787	0.812186	0.505783	0.638169	0.427673	0.741609	0.713072	0.557528	0.57873	0.871789	0.563758	0.739795	0.289225	0.765493	0.647958	0.66262	0.641938	0.544645	0.666486
TCGA-RY-A83X	0.25387	0.497659	0.485036	0.496127	0.721833	0.777491	0.399373	0.600778	0.311362	0.698093	0.621027	0.506342	0.326402	0.850437	0.494736	0.683167	0.186707	0.750569	0.535197	0.620541	0.541579	0.444693	0.605001
TCGA-P5-A5F6	0.220609	0.551685	0.627362	0.626711	0.757983	0.767673	0.511389	0.694301	0.481488	0.789847	0.794766	0.608152	0.411178	0.848603	0.528022	0.685683	0.34152	0.829965	0.658902	0.657206	0.59827	0.510089	0.578946
TCGA-HT-7470	0.257148	0.551519	0.542286	0.561167	0.730868	0.799109	0.488693	0.622082	0.378782	0.756245	0.662606	0.52855	0.45703	0.863778	0.537104	0.729824	0.190991	0.745629	0.576044	0.648264	0.596184	0.506747	0.6528
TCGA-TM-A84Q	0.407637	0.554944	0.668443	0.610553	0.772258	0.785069	0.493286	0.656389	0.476309	0.773101	0.805888	0.599858	0.496626	0.884801	0.529779	0.739455	0.299562	0.759545	0.639912	0.692804	0.615189	0.495427	0.62576
TCGA-R8-A6ML	0.300301	0.489242	0.604497	0.523588	0.729242	0.770004	0.447396	0.645365	0.322083	0.693276	0.595078	0.50511	0.329328	0.836811	0.498985	0.681028	0.170429	0.747835	0.575183	0.603602	0.549673	0.484142	0.60291
TCGA-P5-A5EU	0.34658	0.669365	0.671422	0.663061	0.789317	0.77729	0.452955	0.726159	0.520775	0.771248	0.850998	0.578483	0.518853	0.855497	0.593271	0.729576	0.301304	0.767498	0.720552	0.700592	0.652514	0.475804	0.697939
TCGA-DB-A4XG	0.268541	0.533539	0.414915	0.47363	0.72688	0.794674	0.399975	0.62988	0.286503	0.682183	0.493158	0.452316	0.344338	0.80337	0.47885	0.630326	0.191838	0.730907	0.506398	0.606574	0.530489	0.42514	0.625139
TCGA-QH-A65X	0.416573	0.578022	0.685214	0.546286	0.744623	0.832288	0.506972	0.670616	0.438234	0.678978	0.70086	0.559567	0.550152	0.86292	0.572066	0.724136	0.27123	0.762201	0.650598	0.657808	0.59113	0.477645	0.635557
TCGA-TQ-A7RS	0.225465	0.440342	0.499114	0.537167	0.711221	0.77303	0.461502	0.589887	0.310706	0.678766	0.578905	0.474374	0.304054	0.843258	0.481514	0.696235	0.206727	0.739279	0.509326	0.61408	0.538387	0.475566	0.551456
TCGA-S9-A6U0	0.407742	0.680767	0.806169	0.674824	0.770942	0.787529	0.471758	0.74497	0.555283	0.775348	0.867326	0.583276	0.545291	0.883478	0.666751	0.793164	0.451204	0.798097	0.748651	0.74314	0.693552	0.541599	0.714453
TCGA-FG-5965-1	0.234541	0.523342	0.515153	0.508456	0.721023	0.794009	0.44966	0.598104	0.304484	0.698406	0.519535	0.459915	0.384453	0.852018	0.483317	0.680969	0.0752845	0.745208	0.524406	0.558559	0.578924	0.469321	0.612936
TCGA-HT-8015	0.361388	0.581435	0.63439	0.572657	0.755325	0.842301	0.523995	0.641679	0.469845	0.763749	0.731828	0.554729	0.52431	0.857366	0.564094	0.752114	0.235921	0.810499	0.631889	0.689019	0.66261	0.537745	0.667031
TCGA-QH-A6X3	0.268117	0.57114	0.550642	0.557315	0.752339	0.771602	0.552816	0.648731	0.419962	0.71868	0.651028	0.506389	0.533054	0.842579	0.516362	0.728035	0.184738	0.761696	0.603896	0.660767	0.554655	0.437369	0.640969
TCGA-DU-6396	0.430648	0.589829	0.748847	0.659698	0.758725	0.767389	0.512492	0.674793	0.601657	0.807348	0.894773	0.646488	0.575868	0.90654	0.586695	0.784369	0.351861	0.791722	0.711382	0.734758	0.650563	0.489518	0.669261
TCGA-FG-A4MY	0.215132	0.504557	0.598123	0.577146	0.764713	0.770923	0.453416	0.656942	0.377774	0.751491	0.726304	0.515072	0.499416	0.832066	0.525635	0.746007	0.248924	0.782687	0.589934	0.636753	0.576949	0.486274	0.61372
TCGA-HT-7684	0.293819	0.521869	0.588155	0.594597	0.754232	0.783515	0.523562	0.66096	0.445083	0.732222	0.776951	0.595554	0.495818	0.878421	0.566144	0.734754	0.360344	0.784394	0.648037	0.710284	0.592458	0.508583	0.600385
TCGA-HT-7608	0.271875	0.47893	0.531913	0.600063	0.748809	0.75956	0.546541	0.631288	0.412733	0.722995	0.721498	0.582402	0.476947	0.869903	0.52616	0.687408	0.281951	0.771643	0.621213	0.644172	0.611138	0.534566	0.620732
TCGA-CS-5395	0.265193	0.567795	0.616945	0.557007	0.750555	0.803223	0.440548	0.658578	0.418029	0.720511	0.680386	0.541235	0.445303	0.876588	0.581039	0.727175	0.293022	0.758543	0.604155	0.655701	0.613019	0.465422	0.667406
TCGA-WY-A85E	0.262209	0.570487	0.55798	0.563049	0.745971	0.78954	0.461553	0.599983	0.353787	0.697244	0.570232	0.465414	0.373553	0.851441	0.525295	0.649593	0.084012	0.747265	0.511451	0.597955	0.575517	0.49598	0.642989
TCGA-P5-A72X	0.343129	0.515501	0.637573	0.568757	0.742607	0.820247	0.510128	0.628337	0.398996	0.725779	0.691641	0.505322	0.468645	0.859348	0.563817	0.730067	0.226627	0.768042	0.582785	0.659412	0.631015	0.528809	0.635387
TCGA-E1-5311	0.327439	0.546931	0.561777	0.505015	0.731945	0.792053	0.487748	0.617311	0.307925	0.697112	0.649079	0.540868	0.447638	0.848276	0.519235	0.697198	0.329894	0.763495	0.570759	0.626274	0.575323	0.513698	0.651527
TCGA-DU-5852	0.355011	0.633732	0.671588	0.644671	0.761532	0.804091	0.476525	0.679387	0.524029	0.761449	0.820426	0.551133	0.542568	0.880462	0.591127	0.773913	0.329799	0.795721	0.686075	0.707212	0.680542	0.535887	0.708599
TCGA-DB-5281	0.309512	0.553473	0.597807	0.585335	0.761749	0.819335	0.494858	0.640192	0.441749	0.748499	0.7283	0.575542	0.593146	0.868424	0.542478	0.733709	0.328509	0.763521	0.638805	0.656378	0.632647	0.530138	0.669375
TCGA-DU-A5TR	0.503891	0.52771	0.804783	0.660911	0.765297	0.844436	0.51082	0.653695	0.552047	0.790364	0.909283	0.681649	0.577289	0.914007	0.598939	0.771042	0.314039	0.788847	0.647982	0.730613	0.675914	0.557743	0.575141
TCGA-CS-5396	0.268745	0.603126	0.63288	0.592951	0.737551	0.756948	0.469132	0.698601	0.503593	0.731502	0.723981	0.592812	0.472617	0.81821	0.573482	0.736757	0.358534	0.798429	0.672978	0.685572	0.634715	0.505481	0.697006
TCGA-HT-7620	0.350718	0.531761	0.563914	0.552177	0.714736	0.789873	0.448854	0.640165	0.4397	0.704044	0.654335	0.512753	0.407181	0.855751	0.518403	0.715131	0.220493	0.772585	0.595342	0.648955	0.581458	0.477929	0.628382
TCGA-HT-7856	0.275999	0.52209	0.525302	0.541375	0.731652	0.812603	0.459827	0.63845	0.328669	0.726482	0.654859	0.516904	0.435566	0.85136	0.487454	0.732803	0.246813	0.77047	0.585751	0.636678	0.599069	0.517569	0.628718
TCGA-HT-8019	0.296416	0.434457	0.491302	0.519362	0.711247	0.798933	0.468296	0.620585	0.298695	0.722257	0.571082	0.467542	0.44915	0.854279	0.480835	0.688949	0.110311	0.752189	0.532888	0.616369	0.599538	0.472516	0.573012
TCGA-HW-7493	0.457535	0.617648	0.667052	0.614609	0.754602	0.79047	0.541858	0.664333	0.508022	0.774412	0.790722	0.603552	0.577062	0.854382	0.581651	0.754109	0.360315	0.777961	0.680143	0.702455	0.661443	0.551472	0.666755
TCGA-QH-A65Z	0.33633	0.497468	0.586966	0.507273	0.741062	0.799369	0.435053	0.599604	0.351421	0.707899	0.635922	0.488641	0.421446	0.867607	0.493463	0.657787	0.224346	0.759403	0.533388	0.62561	0.561735	0.475793	0.608152
TCGA-TM-A84T	0.255905	0.468356	0.573774	0.517175	0.734066	0.790227	0.428339	0.606329	0.386184	0.685212	0.687544	0.542859	0.391074	0.865981	0.511024	0.719227	0.166341	0.762556	0.618867	0.667512	0.564487	0.46431	0.587668
TCGA-P5-A5F1	0.364425	0.487216	0.671376	0.59314	0.758995	0.778025	0.491342	0.65344	0.530256	0.759252	0.739957	0.579559	0.442041	0.879361	0.573963	0.741785	0.230957	0.775604	0.634721	0.677558	0.635338	0.50245	0.602165
TCGA-VM-A8CH	0.32841	0.500692	0.589955	0.571511	0.759023	0.771278	0.487957	0.633114	0.448546	0.72784	0.758758	0.5391	0.503414	0.865267	0.539718	0.755451	0.238715	0.7765	0.643428	0.696102	0.587876	0.469999	0.616531
TCGA-FG-7641	0.292051	0.498335	0.451283	0.49311	0.706201	0.79758	0.43592	0.591895	0.287462	0.666558	0.571628	0.469606	0.37168	0.835135	0.463454	0.656882	0.165402	0.728537	0.50366	0.578369	0.563768	0.459123	0.600278
TCGA-DU-7299	0.321815	0.502118	0.555662	0.578449	0.729435	0.775357	0.479568	0.606115	0.474951	0.728876	0.715815	0.54136	0.438327	0.860917	0.529986	0.70349	0.265587	0.763683	0.574417	0.663508	0.602944	0.494363	0.640689
TCGA-HT-7485	0.349504	0.48749	0.574946	0.57884	0.752872	0.757835	0.487946	0.679087	0.447341	0.729806	0.702779	0.528996	0.44934	0.856877	0.530712	0.713635	0.190419	0.746186	0.600117	0.658179	0.60761	0.508788	0.625246
TCGA-HT-7605	0.2676	0.525668	0.595366	0.568004	0.730998	0.82606	0.440687	0.636236	0.375924	0.709191	0.64353	0.509366	0.398816	0.864458	0.506495	0.715371	0.184894	0.758307	0.574035	0.648369	0.611098	0.486194	0.611307
TCGA-TQ-A7RM	0.125742	0.619671	0.566786	0.479517	0.711197	0.723445	0.463995	0.578786	0.30072	0.658139	0.613441	0.390843	0.368973	0.801322	0.484313	0.651021	0.176171	0.740458	0.533269	0.567352	0.505025	0.455936	0.668012
TCGA-HT-A61B	0.410512	0.668137	0.647082	0.659232	0.777401	0.801449	0.498258	0.668626	0.491263	0.757171	0.855265	0.621264	0.548865	0.903901	0.54839	0.738119	0.312869	0.770388	0.650306	0.731815	0.6199	0.506729	0.666844
TCGA-TQ-A7RV	0.350089	0.533485	0.632511	0.641309	0.755101	0.767995	0.558771	0.65089	0.4499	0.699255	0.757657	0.552545	0.508577	0.857607	0.549782	0.730789	0.209967	0.769158	0.632712	0.660385	0.622189	0.530039	0.598162
TCGA-S9-A6WO	0.309651	0.548775	0.549359	0.583442	0.729943	0.769348	0.440378	0.624309	0.392647	0.76049	0.7716	0.561573	0.49561	0.822606	0.497568	0.717759	0.326492	0.763544	0.614006	0.655513	0.574607	0.495447	0.59762
TCGA-CS-6667	0.346571	0.501107	0.562514	0.513786	0.73335	0.747087	0.488869	0.613343	0.372238	0.724379	0.725533	0.572419	0.468764	0.850618	0.546046	0.730989	0.400841	0.797217	0.618999	0.664625	0.595799	0.514839	0.61847
TCGA-DU-6397	0.31684	0.613263	0.682661	0.595204	0.735456	0.818488	0.48739	0.687049	0.421652	0.708615	0.698265	0.531775	0.43727	0.838431	0.557062	0.719143	0.326565	0.773668	0.692777	0.65205	0.601772	0.497545	0.654219
TCGA-S9-A7QW	0.23702	0.551399	0.511803	0.537703	0.729965	0.792234	0.454298	0.571255	0.309265	0.657349	0.602182	0.458719	0.411982	0.868015	0.468334	0.645963	0.158128	0.746696	0.53612	0.608523	0.524126	0.445849	0.620085
TCGA-HT-7693	0.330605	0.557692	0.65183	0.637023	0.745709	0.771306	0.484462	0.637051	0.461585	0.746163	0.833149	0.576243	0.52906	0.84455	0.51872	0.741302	0.407156	0.806915	0.689143	0.684503	0.58818	0.521975	0.604805
TCGA-HW-7490	0.433839	0.543568	0.662896	0.611307	0.759861	0.784607	0.510237	0.651257	0.482716	0.749219	0.757911	0.589443	0.592853	0.87263	0.556172	0.75868	0.345797	0.77431	0.605556	0.64819	0.617728	0.52851	0.626844
TCGA-CS-6666	0.359857	0.629395	0.657679	0.609596	0.777116	0.755664	0.490161	0.664144	0.48851	0.766109	0.759278	0.58324	0.520999	0.839291	0.566356	0.745857	0.319791	0.761483	0.669704	0.685013	0.603995	0.530245	0.681016
TCGA-E1-5305	0.314687	0.606791	0.56417	0.582923	0.752007	0.821775	0.506703	0.663561	0.439484	0.726681	0.744048	0.538246	0.512325	0.874384	0.539789	0.717447	0.349717	0.788281	0.627987	0.700058	0.599108	0.549515	0.664927
TCGA-DU-5870	0.281746	0.574033	0.617621	0.531422	0.741744	0.821623	0.432862	0.684731	0.389834	0.708368	0.655819	0.539156	0.347312	0.823841	0.498815	0.664211	0.246108	0.747597	0.613519	0.638481	0.554676	0.463877	0.657845
TCGA-DU-6407	0.284444	0.566102	0.498468	0.583072	0.756584	0.75278	0.454828	0.669387	0.404579	0.725945	0.695847	0.555696	0.473231	0.863855	0.529101	0.719505	0.233796	0.756222	0.593004	0.66962	0.561008	0.460627	0.639316
TCGA-S9-A7J1	0.331768	0.46939	0.542511	0.548793	0.732644	0.788452	0.416099	0.66182	0.329275	0.71063	0.697692	0.581976	0.351856	0.837354	0.488057	0.666646	0.154315	0.769668	0.580563	0.620842	0.563292	0.45822	0.611612
TCGA-FG-7637	0.467843	0.616635	0.612049	0.510731	0.728899	0.8065	0.454516	0.626169	0.523074	0.720483	0.680265	0.550506	0.503875	0.858864	0.534837	0.682331	0.289958	0.740863	0.605992	0.636812	0.580508	0.484303	0.637148
TCGA-CS-6186	0.294719	0.540141	0.597355	0.577989	0.74893	0.788826	0.41375	0.649586	0.481967	0.716855	0.674957	0.490205	0.398171	0.862676	0.56614	0.740835	0.248071	0.787582	0.4945	0.624165	0.575609	0.479105	0.635573
TCGA-S9-A7QX	0.306975	0.519517	0.509988	0.551883	0.741329	0.755594	0.474752	0.616429	0.413812	0.724497	0.706325	0.508228	0.444988	0.861048	0.517845	0.701456	0.189872	0.766666	0.58173	0.653671	0.58148	0.512834	0.609191
TCGA-DB-A75O	0.279113	0.489333	0.592077	0.56518	0.739811	0.798677	0.514171	0.614563	0.423197	0.724441	0.801465	0.53954	0.50973	0.89428	0.545496	0.696684	0.291153	0.761079	0.594638	0.677554	0.611866	0.539954	0.60535
TCGA-DB-A4XB	0.38777	0.631832	0.606596	0.538371	0.745075	0.821108	0.467954	0.581201	0.433588	0.703645	0.660999	0.508549	0.445714	0.866844	0.49569	0.685766	0.11235	0.74398	0.539814	0.633202	0.579751	0.43783	0.64507
TCGA-FG-8189	0.213251	0.477646	0.456307	0.531193	0.705308	0.80676	0.456558	0.592832	0.298537	0.715014	0.5919	0.478872	0.328923	0.846534	0.465452	0.681992	0.105314	0.758464	0.531893	0.589014	0.59309	0.448691	0.595424
TCGA-HT-7606	0.285644	0.623132	0.569402	0.546086	0.740636	0.755037	0.415882	0.628963	0.4448	0.696546	0.667388	0.484989	0.405527	0.852659	0.515476	0.705657	0.203328	0.742995	0.606567	0.634014	0.562019	0.476249	0.673194
TCGA-DB-A4XA	0.344437	0.537673	0.663608	0.582818	0.752234	0.80987	0.468555	0.652939	0.483363	0.719225	0.745385	0.537126	0.40893	0.87976	0.5459	0.709984	0.221866	0.765485	0.639708	0.681663	0.626718	0.503842	0.6222
TCGA-CS-5397	0.341537	0.599954	0.613549	0.604139	0.758359	0.799907	0.455955	0.673	0.471786	0.743271	0.757815	0.566388	0.495299	0.883525	0.580575	0.747602	0.227864	0.806647	0.680697	0.703165	0.627962	0.494326	0.693808
TCGA-HW-A5KJ	0.315004	0.567024	0.693406	0.514812	0.745909	0.81934	0.47912	0.661219	0.310676	0.69189	0.593978	0.468776	0.390866	0.833702	0.516462	0.6778	0.213555	0.756615	0.551551	0.585434	0.575289	0.471474	0.63882
TCGA-HT-7680	0.481324	0.549861	0.673242	0.640773	0.729107	0.747207	0.540912	0.683434	0.537711	0.758059	0.806877	0.562539	0.593373	0.838629	0.550914	0.757798	0.389265	0.816377	0.665101	0.695121	0.628704	0.547006	0.595722
TCGA-QH-A6CY	0.290608	0.523073	0.584399	0.543187	0.719978	0.800273	0.473766	0.596796	0.372167	0.710474	0.613691	0.504866	0.457015	0.850386	0.489738	0.684546	0.162457	0.754773	0.548634	0.623274	0.589392	0.491023	0.622193
TCGA-DU-8167	0.320565	0.596981	0.624116	0.634016	0.757233	0.780447	0.545541	0.65124	0.472252	0.762699	0.771783	0.601294	0.555991	0.846708	0.538189	0.76761	0.24135	0.791529	0.656314	0.706699	0.613693	0.518393	0.651035
TCGA-DU-8162	0.299516	0.593697	0.569796	0.589144	0.730542	0.808071	0.497296	0.641685	0.425423	0.744877	0.674157	0.531887	0.496492	0.847689	0.55777	0.753302	0.278023	0.787907	0.624074	0.658528	0.637822	0.517157	0.674088
TCGA-DU-6400	0.346289	0.515272	0.625404	0.55756	0.738727	0.809708	0.446065	0.663216	0.386353	0.714089	0.667614	0.490802	0.424869	0.833593	0.512723	0.70253	0.208695	0.767802	0.589601	0.65411	0.584831	0.525397	0.598938
TCGA-TQ-A7RP	0.309579	0.483676	0.652767	0.614711	0.731238	0.791864	0.515752	0.687947	0.469712	0.740109	0.739721	0.510063	0.481716	0.867885	0.566135	0.749034	0.263178	0.796562	0.56732	0.642197	0.639719	0.525181	0.602893
TCGA-WY-A859	0.238395	0.492432	0.438665	0.538329	0.728112	0.806593	0.484631	0.599582	0.307079	0.710905	0.585751	0.447409	0.389034	0.854141	0.471481	0.664678	0.0956468	0.752738	0.52862	0.604448	0.566009	0.478263	0.598297
TCGA-P5-A5EW	0.346826	0.565306	0.609335	0.571106	0.737944	0.753416	0.528892	0.6365	0.419112	0.710658	0.723405	0.564588	0.478849	0.873645	0.549236	0.725058	0.246408	0.786227	0.606659	0.674575	0.599466	0.493557	0.645996
TCGA-S9-A6UA	0.482188	0.729574	0.790884	0.677195	0.784006	0.794285	0.51993	0.698984	0.577879	0.815758	0.922739	0.66325	0.629679	0.905996	0.580813	0.789747	0.391724	0.803091	0.747206	0.758557	0.723667	0.540387	0.710612
TCGA-FG-7636	0.348735	0.502341	0.540798	0.541337	0.739597	0.777366	0.493251	0.620901	0.42865	0.716229	0.634033	0.530463	0.452346	0.871089	0.519989	0.70513	0.160104	0.725714	0.561722	0.630749	0.585206	0.474432	0.638677
TCGA-S9-A7IZ	0.346377	0.505747	0.580222	0.595156	0.74739	0.809108	0.527458	0.625741	0.420869	0.700191	0.706336	0.54687	0.511799	0.872509	0.514413	0.721939	0.214638	0.76221	0.601071	0.65134	0.617436	0.522131	0.638109
TCGA-DU-A6S7	0.281964	0.544751	0.526263	0.551305	0.74692	0.756863	0.458965	0.628361	0.349975	0.721874	0.758174	0.544225	0.473078	0.861634	0.53225	0.726622	0.269198	0.78354	0.618992	0.677184	0.56539	0.458171	0.623028
TCGA-P5-A730	0.31656	0.537202	0.593015	0.536197	0.749523	0.763809	0.462974	0.667943	0.427805	0.718383	0.658061	0.496711	0.379084	0.828147	0.533353	0.711865	0.229988	0.772109	0.612639	0.611019	0.571939	0.482748	0.61714
TCGA-WH-A86K	0.318528	0.475602	0.631698	0.551999	0.760316	0.797527	0.467188	0.603144	0.439181	0.737098	0.697349	0.545075	0.433354	0.857238	0.538189	0.714905	0.225597	0.751649	0.615044	0.665614	0.607555	0.552752	0.600785
TCGA-TM-A84H	0.255608	0.447385	0.51135	0.52863	0.735496	0.828375	0.45521	0.589483	0.363743	0.686967	0.590341	0.501945	0.378578	0.815127	0.441955	0.677475	0.126542	0.749009	0.566949	0.609561	0.540391	0.448487	0.561472
TCGA-TQ-A7RW	0.371499	0.608855	0.627427	0.620034	0.758271	0.777631	0.484032	0.627165	0.513959	0.737779	0.768044	0.614669	0.50701	0.873071	0.520558	0.722449	0.194284	0.787241	0.645658	0.65786	0.622087	0.506476	0.661465
TCGA-HT-7687	0.414033	0.619702	0.656454	0.613645	0.74401	0.813915	0.463367	0.66773	0.458561	0.723459	0.725256	0.553571	0.486077	0.859746	0.542955	0.726391	0.260246	0.779994	0.616019	0.682081	0.613961	0.492659	0.657048
TCGA-FG-A70Z	0.481743	0.657477	0.687826	0.643471	0.783952	0.830981	0.476095	0.680214	0.51485	0.776447	0.839967	0.613079	0.511738	0.899292	0.617078	0.771815	0.289581	0.777055	0.670345	0.710239	0.676263	0.549273	0.699256
TCGA-FG-7643	0.361492	0.527896	0.638002	0.557079	0.727436	0.805122	0.51997	0.635215	0.443113	0.733044	0.685035	0.517093	0.551099	0.862605	0.589775	0.768982	0.315281	0.796566	0.596302	0.661057	0.6472	0.511303	0.674077
TCGA-F6-A8O3	0.316573	0.517697	0.578554	0.502041	0.717073	0.783019	0.465319	0.606543	0.287561	0.707449	0.569298	0.484604	0.420873	0.828249	0.488442	0.621789	0.17003	0.753287	0.557064	0.612597	0.531676	0.486567	0.609086
TCGA-CS-4938	0.271279	0.554154	0.581021	0.618054	0.734697	0.747819	0.475461	0.674733	0.422679	0.727991	0.675567	0.566359	0.471278	0.863042	0.53073	0.710676	0.248926	0.776338	0.631542	0.644455	0.576706	0.507078	0.615679
TCGA-WY-A85C	0.303556	0.509235	0.558996	0.57355	0.754955	0.78222	0.46409	0.619775	0.385788	0.733085	0.748182	0.51547	0.532362	0.826884	0.507279	0.713573	0.387069	0.770955	0.556188	0.660343	0.579395	0.52247	0.593015
TCGA-HW-7486	0.320164	0.553962	0.596057	0.597631	0.734895	0.826811	0.416528	0.667026	0.445378	0.760163	0.72421	0.567464	0.449904	0.85826	0.551515	0.71781	0.254178	0.777482	0.610069	0.668454	0.600745	0.473083	0.632502
TCGA-HT-A74K	0.37241	0.561949	0.597291	0.588822	0.747459	0.852924	0.45106	0.649096	0.484004	0.727994	0.770543	0.584243	0.550686	0.88234	0.535241	0.747413	0.261535	0.773066	0.690816	0.657413	0.588952	0.499533	0.620218
TCGA-DU-6404	0.267957	0.541332	0.713458	0.651476	0.83002	0.85747	0.462145	0.699805	0.407187	0.839091	0.827921	0.601855	0.475684	0.86591	0.602657	0.757112	0.359475	0.818604	0.649779	0.708785	0.672695	0.527929	0.637376
TCGA-HT-7602	0.376319	0.498859	0.589227	0.576125	0.729676	0.784409	0.480218	0.624285	0.432442	0.725523	0.70875	0.533046	0.448482	0.861545	0.546821	0.731899	0.183793	0.770296	0.568113	0.657136	0.601555	0.508652	0.591334
TCGA-E1-A7Z4	0.369499	0.477462	0.544049	0.599872	0.739687	0.742964	0.508778	0.638291	0.427959	0.751397	0.774497	0.552269	0.47087	0.855793	0.522758	0.718071	0.243417	0.773083	0.602044	0.667244	0.589638	0.492683	0.570378
TCGA-QH-A6CW	0.392317	0.608668	0.595074	0.578995	0.750481	0.773226	0.528858	0.601196	0.419636	0.721698	0.742282	0.588052	0.540822	0.844986	0.552728	0.716588	0.267376	0.767533	0.619281	0.673129	0.585696	0.515414	0.622586
TCGA-S9-A7R2	0.393228	0.55732	0.748634	0.630104	0.75246	0.788096	0.512683	0.65174	0.501718	0.762372	0.833976	0.546001	0.528587	0.861938	0.562961	0.762503	0.235117	0.831702	0.637748	0.69189	0.646694	0.509413	0.62921
TCGA-S9-A7IS	0.321467	0.70829	0.637481	0.594572	0.742542	0.745387	0.537959	0.636421	0.443242	0.71517	0.730818	0.528944	0.541487	0.861525	0.531709	0.718993	0.245841	0.782652	0.601028	0.667666	0.585058	0.46766	0.673834
TCGA-DU-6410	0.238591	0.514254	0.491201	0.477442	0.711546	0.784897	0.419239	0.640396	0.311919	0.654657	0.498722	0.43102	0.368143	0.814387	0.484012	0.642158	0.198654	0.732088	0.547633	0.5754	0.509142	0.467697	0.642181
TCGA-DU-8164	0.239118	0.557997	0.491472	0.542977	0.726567	0.779688	0.454102	0.621397	0.337301	0.685295	0.5655	0.488169	0.407977	0.864266	0.505257	0.668211	0.175298	0.746181	0.55763	0.598327	0.541698	0.462856	0.631142
TCGA-FG-8191	0.351616	0.586258	0.638383	0.651281	0.749951	0.756421	0.598268	0.6567	0.461343	0.749132	0.7663	0.58043	0.558456	0.851846	0.5548	0.752245	0.298219	0.784776	0.640013	0.690906	0.61124	0.512869	0.605724
TCGA-FG-6688	0.360239	0.574234	0.654285	0.601839	0.767743	0.778978	0.484954	0.684304	0.483553	0.76629	0.82919	0.596222	0.524454	0.877376	0.572962	0.796596	0.275411	0.793189	0.621689	0.702236	0.637951	0.538166	0.644636
TCGA-DU-7298	0.343412	0.653422	0.553411	0.598305	0.757003	0.765825	0.472067	0.64433	0.455529	0.720347	0.706125	0.535252	0.470518	0.868391	0.502111	0.727674	0.209068	0.770326	0.617606	0.670532	0.596069	0.467527	0.703147
TCGA-E1-A7YM	0.325029	0.508236	0.581102	0.535841	0.725319	0.776505	0.392761	0.622151	0.377386	0.715279	0.690385	0.475597	0.450642	0.85657	0.518209	0.706905	0.221698	0.786385	0.521122	0.609082	0.600576	0.516928	0.650316
TCGA-DB-5270	0.412189	0.569835	0.647647	0.619842	0.757247	0.811398	0.52303	0.65471	0.499608	0.767286	0.738482	0.558443	0.574293	0.870852	0.540231	0.741457	0.18361	0.752735	0.634603	0.681908	0.647528	0.519075	0.670874
TCGA-TM-A7CA	0.283962	0.479297	0.4966	0.547918	0.712642	0.787977	0.429147	0.594368	0.307822	0.717016	0.624963	0.492941	0.373306	0.84681	0.495574	0.681375	0.137739	0.747965	0.565931	0.626739	0.547178	0.468044	0.626207
TCGA-RY-A83Y	0.289543	0.549308	0.638719	0.560361	0.73337	0.796027	0.44666	0.671939	0.419724	0.719051	0.702821	0.570571	0.408615	0.84865	0.523438	0.700856	0.239135	0.768414	0.590559	0.682946	0.570509	0.523756	0.608068
TCGA-DU-5855	0.39417	0.587084	0.61954	0.62059	0.753234	0.803246	0.534082	0.623555	0.548195	0.766525	0.773264	0.569628	0.567383	0.863842	0.530253	0.775493	0.292901	0.792605	0.651522	0.691462	0.611329	0.498562	0.649587
TCGA-HT-7603	0.301836	0.510962	0.548805	0.531972	0.733432	0.766253	0.498785	0.627098	0.360208	0.742281	0.629087	0.520997	0.470001	0.862379	0.510805	0.689074	0.227724	0.731389	0.556761	0.604391	0.59884	0.519333	0.644393
TCGA-DU-6402	0.42188	0.673573	0.769711	0.648748	0.790975	0.796328	0.467726	0.744725	0.548973	0.812192	0.889465	0.600337	0.561648	0.877044	0.637888	0.776537	0.34814	0.788244	0.724215	0.751116	0.690299	0.586557	0.72452
TCGA-TM-A7CF	0.29691	0.442083	0.477068	0.520471	0.709333	0.79265	0.425396	0.564644	0.322891	0.707189	0.561171	0.45788	0.407291	0.820097	0.469601	0.68627	0.0463929	0.743764	0.469125	0.582056	0.528717	0.437173	0.581429
TCGA-HT-7482	0.257919	0.597237	0.557303	0.582575	0.756044	0.743014	0.549818	0.634554	0.46805	0.734323	0.774737	0.615634	0.510068	0.858152	0.537593	0.707695	0.23283	0.785822	0.643849	0.679196	0.605264	0.498928	0.658684
TCGA-DB-A64Q	0.200011	0.504367	0.521584	0.521793	0.724539	0.779388	0.504666	0.624825	0.329023	0.683175	0.647033	0.49528	0.40264	0.855265	0.501912	0.669756	0.207167	0.745097	0.543832	0.611704	0.547921	0.481461	0.580408
TCGA-DU-A76R	0.241484	0.478841	0.530499	0.55018	0.725197	0.783776	0.441184	0.599701	0.334237	0.700291	0.664845	0.516078	0.402922	0.8365	0.520662	0.683169	0.142364	0.753541	0.610865	0.628646	0.588813	0.49075	0.595133
TCGA-DH-A66D	0.32634	0.583547	0.614734	0.634564	0.734288	0.826913	0.4771	0.635716	0.481041	0.740529	0.771919	0.584177	0.455543	0.872286	0.532539	0.739728	0.180874	0.754797	0.614916	0.67864	0.615537	0.521177	0.643539
TCGA-DB-A75M	0.284181	0.450386	0.592673	0.570901	0.739811	0.772692	0.432465	0.64149	0.406509	0.71602	0.717609	0.545453	0.416636	0.868768	0.509097	0.70075	0.225248	0.760917	0.60153	0.656966	0.594802	0.496717	0.597456
TCGA-DB-A4XF	0.326572	0.59429	0.591654	0.591214	0.767272	0.803745	0.495216	0.62711	0.425571	0.736153	0.69166	0.561718	0.543616	0.855269	0.543115	0.738716	0.200773	0.766968	0.627971	0.651945	0.609919	0.480287	0.670021
TCGA-VM-A8CA	0.339207	0.507267	0.661359	0.623166	0.749855	0.800996	0.51318	0.673999	0.460172	0.727857	0.768321	0.584137	0.502187	0.860837	0.566466	0.747197	0.378723	0.803478	0.670265	0.65736	0.644749	0.529909	0.591822
TCGA-DU-6397-1	0.410714	0.568437	0.62144	0.56019	0.750706	0.796229	0.513671	0.69095	0.499795	0.708783	0.699782	0.601205	0.524414	0.85732	0.542166	0.722197	0.366118	0.789245	0.666316	0.676563	0.596027	0.521095	0.642242
TCGA-DU-5847	0.429763	0.682457	0.735427	0.663864	0.77512	0.794378	0.485234	0.700872	0.524956	0.768891	0.900495	0.596087	0.497202	0.884768	0.611093	0.788509	0.310676	0.792425	0.692303	0.729395	0.691195	0.531614	0.719824
TCGA-S9-A6UB	0.240347	0.513616	0.50204	0.452959	0.711337	0.803299	0.383185	0.577586	0.324237	0.662342	0.535002	0.44594	0.345294	0.84976	0.473495	0.644657	0.115943	0.723982	0.490675	0.580497	0.514265	0.439636	0.598892
TCGA-S9-A6U6	0.311511	0.566867	0.513745	0.563265	0.741362	0.805105	0.477376	0.606251	0.353694	0.721733	0.684282	0.558137	0.451955	0.856079	0.530142	0.714476	0.207867	0.761363	0.598107	0.661199	0.5656	0.478865	0.619608
TCGA-DU-6399	0.340585	0.625464	0.61448	0.571303	0.761074	0.770219	0.483738	0.646242	0.484011	0.733927	0.759415	0.534718	0.477141	0.863777	0.547438	0.747644	0.265619	0.773725	0.664801	0.681867	0.588782	0.49182	0.648341
TCGA-E1-5322	0.374611	0.627981	0.556475	0.604785	0.762299	0.779611	0.542346	0.650391	0.529475	0.742518	0.794784	0.609203	0.541006	0.863858	0.529133	0.712935	0.31741	0.776542	0.697606	0.7045	0.610152	0.539406	0.657062
TCGA-E1-A7YO	0.28339	0.535741	0.519469	0.522189	0.731844	0.799165	0.469556	0.628767	0.298455	0.694919	0.598605	0.507037	0.427147	0.848681	0.497603	0.69226	0.259715	0.751221	0.547071	0.607688	0.585372	0.530158	0.629933
TCGA-DU-7306	0.423887	0.498218	0.607786	0.597866	0.767771	0.768034	0.503876	0.665044	0.541514	0.754204	0.753855	0.573273	0.583924	0.871631	0.559882	0.753785	0.403505	0.773217	0.644156	0.661912	0.617423	0.517502	0.635462
TCGA-DH-A66G	0.409429	0.618779	0.624394	0.628238	0.762836	0.817459	0.561817	0.646593	0.469861	0.788561	0.795552	0.598928	0.553574	0.857146	0.557046	0.755553	0.24285	0.779528	0.658973	0.674777	0.651284	0.546056	0.66769
TCGA-VM-A8C8	0.312892	0.504181	0.527048	0.569416	0.733404	0.739069	0.463825	0.62139	0.412257	0.737788	0.694226	0.565911	0.401038	0.848131	0.532152	0.711605	0.258002	0.782238	0.635833	0.622258	0.581508	0.466026	0.626966
TCGA-S9-A7J0	0.266339	0.645658	0.514764	0.561375	0.730767	0.731559	0.410539	0.603663	0.353396	0.68405	0.644491	0.511546	0.381502	0.828633	0.486441	0.654505	0.103185	0.734813	0.596209	0.631184	0.526435	0.44773	0.658121
TCGA-W9-A837	0.22066	0.473514	0.487025	0.537569	0.719222	0.840532	0.467263	0.617845	0.340002	0.654811	0.595837	0.470735	0.336802	0.858239	0.476038	0.676474	0.196685	0.749101	0.541011	0.59541	0.560673	0.488886	0.574668
TCGA-FG-8185	0.24874	0.530104	0.51921	0.59506	0.768038	0.763726	0.496077	0.579147	0.409767	0.711503	0.652088	0.532664	0.46379	0.836354	0.480773	0.710008	0.208742	0.745575	0.569178	0.625687	0.576453	0.477331	0.636115
TCGA-E1-5319	0.335698	0.505557	0.643143	0.594402	0.753345	0.776712	0.523394	0.714182	0.457683	0.74134	0.722485	0.574691	0.476761	0.873309	0.54505	0.727647	0.321729	0.768192	0.645618	0.675632	0.626352	0.516614	0.627129
TCGA-DU-8168	0.278573	0.581115	0.508817	0.526312	0.728643	0.772583	0.407333	0.649401	0.387002	0.708085	0.556075	0.522357	0.478621	0.822654	0.478467	0.640077	0.200258	0.774226	0.592292	0.619993	0.544732	0.459899	0.64421
TCGA-HT-7607	0.361435	0.540728	0.590029	0.599843	0.73654	0.808319	0.500728	0.625705	0.415376	0.716439	0.700469	0.538932	0.510905	0.855839	0.541793	0.733826	0.203062	0.760191	0.603468	0.653278	0.630004	0.539221	0.629494
TCGA-HT-8012	0.335534	0.48564	0.523487	0.551083	0.727979	0.810231	0.468569	0.636617	0.374575	0.694528	0.660775	0.539627	0.416278	0.833133	0.497914	0.69496	0.211923	0.768031	0.582558	0.643094	0.566304	0.472131	0.577535
TCGA-S9-A6WN	0.42945	0.526152	0.703694	0.667117	0.797098	0.739218	0.472021	0.66522	0.513436	0.804875	0.862164	0.640384	0.504971	0.888185	0.562959	0.774899	0.288859	0.782271	0.726786	0.733611	0.671969	0.529557	0.617086
TCGA-TM-A84M	0.155797	0.574543	0.453681	0.472826	0.711069	0.826886	0.459321	0.623565	0.342756	0.686528	0.520409	0.447349	0.361705	0.775057	0.447052	0.650228	0.108412	0.725492	0.572233	0.587506	0.51206	0.426636	0.604331
TCGA-DB-A4X9	0.208079	0.46921	0.479135	0.549381	0.729046	0.781616	0.478335	0.587166	0.330095	0.673247	0.624129	0.496148	0.427834	0.847262	0.518536	0.69238	0.146769	0.733848	0.548752	0.593424	0.564719	0.414567	0.600682
TCGA-RY-A845	0.326464	0.522179	0.517716	0.568393	0.734524	0.770949	0.471253	0.633131	0.376129	0.722185	0.656595	0.514851	0.425889	0.866134	0.507997	0.702837	0.223685	0.752477	0.58187	0.638917	0.561986	0.475392	0.606879
TCGA-DU-7018	0.22794	0.590089	0.536224	0.505583	0.732909	0.808046	0.478829	0.636216	0.348828	0.683681	0.590629	0.49646	0.390855	0.823231	0.51991	0.700892	0.235007	0.752131	0.580648	0.614769	0.570294	0.481695	0.647757
TCGA-HW-A5KL	0.348387	0.499054	0.546093	0.538886	0.714814	0.760022	0.420216	0.617615	0.405693	0.72485	0.692134	0.528583	0.384023	0.854414	0.521319	0.701149	0.194677	0.758085	0.600006	0.639787	0.558032	0.468141	0.614024
TCGA-S9-A6U1	0.257943	0.616669	0.546228	0.582863	0.74128	0.751005	0.490074	0.651897	0.35434	0.691391	0.704152	0.557853	0.444253	0.854756	0.500924	0.723326	0.299922	0.770712	0.591216	0.661525	0.546553	0.474211	0.632432
TCGA-HT-7476	0.360557	0.594192	0.627705	0.571209	0.746003	0.80546	0.46975	0.641411	0.417108	0.741555	0.70605	0.517556	0.526729	0.856167	0.569086	0.760218	0.213046	0.754177	0.623027	0.677286	0.644044	0.536016	0.663066
TCGA-CS-4944	0.353038	0.520813	0.688882	0.582817	0.76149	0.777897	0.50491	0.698265	0.464761	0.7604	0.771359	0.577772	0.486496	0.867347	0.556801	0.745451	0.275168	0.785732	0.65728	0.711823	0.643985	0.498896	0.633966
TCGA-DU-6395	0.380509	0.581634	0.604955	0.5804	0.740777	0.757531	0.500625	0.67638	0.438223	0.739388	0.776251	0.571843	0.528083	0.889018	0.559087	0.752599	0.29658	0.773952	0.626914	0.708828	0.603726	0.529848	0.630977
TCGA-FG-7638	0.330224	0.58006	0.62965	0.585199	0.742339	0.802672	0.488121	0.617945	0.403773	0.722119	0.653397	0.562546	0.443489	0.874067	0.554788	0.682395	0.190642	0.744588	0.587006	0.643503	0.608819	0.525737	0.655441
TCGA-HT-8111	0.481888	0.601953	0.655695	0.608652	0.746664	0.765747	0.476675	0.630818	0.498681	0.756428	0.770951	0.554939	0.460307	0.863236	0.540627	0.748153	0.214602	0.774512	0.612139	0.682897	0.620465	0.512437	0.657691
TCGA-P5-A781	0.252925	0.486468	0.556766	0.537377	0.742118	0.816987	0.412357	0.634133	0.399521	0.713026	0.659209	0.518985	0.355401	0.826769	0.511391	0.696156	0.183557	0.767407	0.563416	0.632364	0.589927	0.503811	0.593882
TCGA-DU-7007	0.490799	0.581233	0.727849	0.649566	0.769275	0.759922	0.49229	0.707402	0.524657	0.751277	0.845479	0.6232	0.526106	0.869451	0.594502	0.765573	0.297906	0.768924	0.706857	0.716712	0.648488	0.529956	0.651368
TCGA-HT-7884	0.254045	0.438369	0.485985	0.514699	0.729105	0.797153	0.397447	0.604814	0.296833	0.686946	0.611793	0.460939	0.385025	0.821764	0.483813	0.695733	0.151413	0.750388	0.536642	0.596628	0.54574	0.499148	0.609809
TCGA-FG-6692	0.346353	0.637142	0.716595	0.607734	0.76938	0.746605	0.435157	0.703613	0.471341	0.769661	0.830253	0.584594	0.45218	0.85601	0.607519	0.734967	0.364514	0.792504	0.629547	0.696448	0.642112	0.488204	0.66712
TCGA-DU-A7TG	0.331729	0.551109	0.530489	0.602112	0.725222	0.806264	0.508536	0.649096	0.42419	0.740919	0.733388	0.566748	0.486581	0.864679	0.520194	0.750457	0.431402	0.791656	0.598233	0.654703	0.618516	0.546051	0.604089
TCGA-KT-A74X	0.31108	0.586569	0.669719	0.591647	0.759658	0.780927	0.426192	0.662668	0.395591	0.736455	0.720601	0.515761	0.403146	0.857986	0.538595	0.712638	0.326182	0.771396	0.631178	0.64286	0.577426	0.503179	0.647035
TCGA-DB-A64X	0.343839	0.470406	0.546405	0.562686	0.763597	0.790606	0.461628	0.644907	0.433395	0.730358	0.637089	0.504192	0.478743	0.822482	0.505967	0.699348	0.203252	0.765234	0.584692	0.636983	0.595779	0.456265	0.601848
TCGA-E1-A7YQ	0.405572	0.683684	0.721289	0.690688	0.758895	0.795358	0.509638	0.714153	0.563226	0.784563	0.903243	0.634706	0.585029	0.851897	0.617656	0.763189	0.405456	0.805092	0.718106	0.729719	0.675967	0.523605	0.702387
TCGA-WY-A85B	0.363745	0.633068	0.630046	0.585079	0.763017	0.740192	0.476284	0.687934	0.384123	0.737744	0.799109	0.604883	0.466543	0.878867	0.547541	0.720902	0.203141	0.773612	0.611256	0.691546	0.573957	0.442661	0.653275
TCGA-HT-7854	0.401664	0.568018	0.6403	0.666799	0.746835	0.819717	0.564567	0.66427	0.471495	0.781729	0.841472	0.594919	0.595796	0.857859	0.562446	0.805869	0.39894	0.818491	0.638021	0.71845	0.665365	0.546463	0.593276
TCGA-HT-7676	0.370629	0.595581	0.614504	0.605672	0.743563	0.791834	0.468352	0.664232	0.460084	0.744521	0.813593	0.615009	0.504878	0.882865	0.537172	0.731118	0.387021	0.759931	0.63148	0.686794	0.606282	0.549708	0.651186
TCGA-DB-A64W	0.18851	0.593062	0.436871	0.447405	0.721784	0.796776	0.389307	0.593581	0.21479	0.674623	0.490212	0.42034	0.277354	0.843871	0.456497	0.670411	0.12369	0.719593	0.488861	0.569426	0.523861	0.464242	0.691546
TCGA-P5-A5F0	0.260834	0.464271	0.551024	0.532059	0.712788	0.796698	0.435748	0.610421	0.294448	0.669719	0.560132	0.446303	0.351439	0.851566	0.483768	0.645201	0.0820799	0.744763	0.491464	0.592962	0.569804	0.432562	0.615108
TCGA-HW-8322	0.38342	0.605634	0.597976	0.536471	0.727382	0.811404	0.41974	0.665656	0.446891	0.726179	0.696076	0.530787	0.4569	0.844124	0.513904	0.690301	0.310122	0.754164	0.625904	0.65127	0.56786	0.492397	0.629053
TCGA-HT-A618	0.40927	0.567863	0.707017	0.650703	0.774168	0.812735	0.508763	0.654413	0.515215	0.793255	0.844627	0.581645	0.564193	0.874392	0.547578	0.756173	0.3525	0.783845	0.636326	0.692968	0.661214	0.554025	0.647777
TCGA-R8-A6MO	0.324546	0.521075	0.63922	0.566785	0.734306	0.784042	0.456492	0.643132	0.35387	0.716489	0.705938	0.549802	0.430816	0.871564	0.524582	0.721245	0.241129	0.774504	0.579906	0.669333	0.568692	0.49855	0.621526
TCGA-DU-7010	0.304984	0.635733	0.583253	0.571601	0.777967	0.771177	0.500319	0.645787	0.398875	0.722277	0.697266	0.534277	0.412312	0.841543	0.541851	0.741596	0.248566	0.753792	0.600588	0.635792	0.597869	0.498329	0.709495
TCGA-RY-A840	0.218544	0.496104	0.531483	0.506792	0.715931	0.762473	0.417815	0.623297	0.401853	0.690189	0.614523	0.505492	0.307169	0.793141	0.466022	0.639588	0.253661	0.739095	0.57458	0.589172	0.524158	0.443513	0.605608
TCGA-DU-6407-1	0.322335	0.654822	0.640151	0.598633	0.752369	0.780771	0.495851	0.659639	0.479257	0.735087	0.766773	0.585454	0.49999	0.866351	0.561005	0.737685	0.277851	0.758689	0.631249	0.671393	0.595638	0.535936	0.688814
TCGA-DU-A7T8	0.375234	0.611234	0.642024	0.626289	0.756298	0.826469	0.479797	0.646272	0.463983	0.775135	0.803441	0.588369	0.529069	0.872397	0.523049	0.739077	0.397483	0.783487	0.672369	0.682977	0.632471	0.550881	0.635581
TCGA-DU-7015	0.464727	0.648408	0.675656	0.575231	0.762092	0.77194	0.484129	0.646113	0.582704	0.753744	0.799533	0.632675	0.51993	0.864328	0.548679	0.753893	0.293461	0.768649	0.636872	0.684399	0.620249	0.516424	0.684732
TCGA-TQ-A8XE-1	0.304557	0.561269	0.603258	0.589549	0.751096	0.735762	0.480667	0.652755	0.470372	0.776134	0.770012	0.551144	0.441618	0.873766	0.53874	0.738257	0.280314	0.76706	0.618473	0.672364	0.593696	0.533944	0.65222
TCGA-HW-A5KK	0.301113	0.606175	0.718821	0.658711	0.759443	0.774414	0.537098	0.66232	0.504336	0.77243	0.880792	0.607346	0.629114	0.863351	0.56223	0.794128	0.305088	0.829363	0.643676	0.716902	0.65186	0.517707	0.640848
TCGA-CS-4941	0.572344	0.638306	0.73332	0.627199	0.778428	0.819149	0.475545	0.696749	0.647599	0.793899	0.859732	0.595242	0.548057	0.880257	0.595234	0.7856	0.356342	0.794107	0.642542	0.728139	0.675068	0.532148	0.685433
TCGA-DU-5872	0.502549	0.59701	0.685694	0.607348	0.768045	0.803544	0.537665	0.671554	0.585333	0.75953	0.815231	0.583715	0.550154	0.890424	0.57098	0.780745	0.411349	0.804384	0.697869	0.70792	0.638175	0.53615	0.664304
TCGA-DU-5870-1	0.310614	0.535082	0.581358	0.544942	0.727289	0.806923	0.46215	0.663444	0.387115	0.711385	0.696733	0.57642	0.386747	0.885159	0.544117	0.719786	0.217704	0.769413	0.636925	0.659044	0.581794	0.515946	0.652966
TCGA-HT-A4DV	0.299284	0.484595	0.62888	0.591087	0.737137	0.811803	0.500842	0.621906	0.390677	0.729314	0.692423	0.524591	0.48556	0.86782	0.525838	0.730673	0.180735	0.788432	0.552909	0.658318	0.615015	0.532117	0.600164
TCGA-DU-8165	0.4547	0.726208	0.741343	0.641956	0.778161	0.763115	0.580641	0.701576	0.535207	0.762602	0.827647	0.582993	0.524929	0.888598	0.588378	0.772024	0.292215	0.811591	0.699201	0.718722	0.667082	0.504055	0.706245
TCGA-P5-A5EZ	0.387351	0.627793	0.753409	0.585686	0.774265	0.764793	0.481942	0.677852	0.519345	0.733452	0.786125	0.545388	0.501653	0.857238	0.575945	0.748265	0.244097	0.795136	0.676073	0.680849	0.632114	0.503839	0.672579
TCGA-EZ-7264	0.286328	0.517281	0.529035	0.516291	0.700455	0.768888	0.42501	0.613925	0.295904	0.689117	0.610349	0.501425	0.347983	0.815471	0.470434	0.652293	0.217557	0.761976	0.566202	0.616289	0.545537	0.487364	0.619028
TCGA-DU-6408	0.317575	0.61709	0.569599	0.605505	0.750404	0.786013	0.508132	0.606429	0.423216	0.752146	0.727608	0.546138	0.519999	0.86707	0.527476	0.71128	0.25453	0.751858	0.607304	0.652128	0.598256	0.521246	0.635862
TCGA-S9-A6WH	0.255488	0.477298	0.516673	0.544788	0.729099	0.812083	0.411109	0.597438	0.334079	0.729787	0.668266	0.549857	0.377306	0.813926	0.468151	0.671798	0.30074	0.764279	0.625082	0.620695	0.543138	0.488485	0.591799
TCGA-TM-A84C	0.321369	0.580126	0.621762	0.62956	0.762811	0.76158	0.458704	0.65392	0.453612	0.770251	0.783306	0.554837	0.513045	0.863947	0.564421	0.732482	0.205647	0.792004	0.62455	0.678238	0.640904	0.554804	0.618622
TCGA-S9-A6TW	0.427045	0.560767	0.684844	0.561911	0.75136	0.781899	0.486294	0.683378	0.43465	0.727894	0.714096	0.598198	0.497996	0.855997	0.560465	0.730513	0.313088	0.778728	0.638557	0.643288	0.608471	0.525244	0.630922
TCGA-DU-6542	0.348112	0.579474	0.626493	0.630105	0.753069	0.805364	0.495686	0.665503	0.520896	0.781856	0.781913	0.600462	0.529994	0.878971	0.563059	0.738339	0.202496	0.775577	0.645089	0.70358	0.626981	0.502813	0.652193
TCGA-VM-A8C9	0.473361	0.54086	0.782897	0.636687	0.779344	0.78449	0.474559	0.669765	0.615925	0.779599	0.885167	0.618665	0.652931	0.899825	0.614109	0.78929	0.367927	0.80615	0.721532	0.713486	0.661774	0.531558	0.619155
TCGA-E1-A7YN	0.514922	0.627523	0.810775	0.685095	0.764276	0.820743	0.472867	0.747782	0.655587	0.801569	0.951404	0.668869	0.541735	0.904937	0.645227	0.799655	0.419614	0.830573	0.781255	0.7483	0.726089	0.553982	0.649926
TCGA-DU-6392	0.413432	0.682658	0.672111	0.621612	0.730954	0.80182	0.472971	0.689249	0.530731	0.758497	0.800361	0.597041	0.559133	0.870321	0.545673	0.748619	0.36604	0.791626	0.697365	0.706923	0.647384	0.524531	0.690211
TCGA-DH-A669-1	0.40953	0.711366	0.699874	0.574735	0.792863	0.798558	0.453877	0.675802	0.584857	0.716752	0.741171	0.556763	0.448905	0.859051	0.542928	0.7118	0.189661	0.759675	0.637434	0.672237	0.608065	0.490834	0.716182
TCGA-HT-7472	0.373675	0.653274	0.669109	0.631157	0.777913	0.762798	0.527909	0.664627	0.531498	0.74216	0.775273	0.579996	0.534003	0.870305	0.545641	0.770102	0.238104	0.754414	0.689201	0.704477	0.624935	0.510272	0.682125
TCGA-DU-A7TD	0.38313	0.712267	0.694064	0.681319	0.762307	0.752518	0.46516	0.721053	0.565799	0.761725	0.863627	0.555711	0.548968	0.867182	0.572005	0.758681	0.374722	0.800416	0.651801	0.718103	0.645354	0.521611	0.680542
TCGA-CS-6188	0.322619	0.624102	0.638068	0.589077	0.761299	0.799636	0.46048	0.706548	0.51438	0.781237	0.769973	0.57535	0.503177	0.876277	0.577957	0.762608	0.321824	0.795115	0.675333	0.707259	0.651493	0.469726	0.686643
TCGA-TM-A84I	0.242212	0.651459	0.617174	0.594796	0.770058	0.713724	0.459018	0.629699	0.436907	0.733053	0.719955	0.518732	0.480877	0.792727	0.49595	0.676632	0.163377	0.741858	0.555666	0.636656	0.5789	0.469832	0.663109
TCGA-DU-5849	0.363501	0.5775	0.623714	0.551386	0.751163	0.821333	0.437035	0.677354	0.400304	0.738508	0.71344	0.551018	0.484318	0.854431	0.528127	0.737172	0.273798	0.762518	0.606881	0.654803	0.599071	0.521614	0.651522
TCGA-HT-7467	0.269745	0.575537	0.596386	0.526362	0.724204	0.802727	0.450003	0.621978	0.419554	0.721385	0.65165	0.499911	0.426001	0.856005	0.509666	0.736567	0.224031	0.772109	0.551523	0.628391	0.600178	0.49047	0.648473
TCGA-P5-A5EV	0.354224	0.525947	0.671854	0.568496	0.752466	0.764587	0.488392	0.61623	0.465127	0.725414	0.720922	0.527184	0.392097	0.8627	0.575866	0.720001	0.228188	0.760302	0.615437	0.671187	0.593881	0.493369	0.633754
TCGA-DU-5872-1	0.576646	0.682423	0.872638	0.749974	0.813512	0.798097	0.538243	0.796726	0.666824	0.87446	0.98932	0.766711	0.723248	0.906424	0.668745	0.836197	0.384637	0.844862	0.883422	0.805412	0.736761	0.558756	0.686105
TCGA-DH-A66F	0.291468	0.456339	0.574584	0.536205	0.746568	0.782818	0.422889	0.663005	0.345111	0.743664	0.687348	0.538153	0.364688	0.831273	0.501503	0.684471	0.261943	0.758615	0.617765	0.629779	0.575638	0.520377	0.572893
TCGA-S9-A6WM	0.27136	0.58282	0.662726	0.569819	0.75567	0.768911	0.441223	0.676878	0.48765	0.714515	0.706542	0.494078	0.428757	0.848757	0.568936	0.746646	0.265633	0.766469	0.614753	0.682884	0.642708	0.501994	0.650237
TCGA-P5-A5EX	0.52161	0.599807	0.786679	0.697941	0.803732	0.796565	0.473943	0.681399	0.618361	0.806907	0.887671	0.671271	0.68653	0.86402	0.585736	0.783246	0.389661	0.812578	0.73602	0.73233	0.697071	0.514676	0.647756
TCGA-HT-7480	0.284285	0.479577	0.531842	0.515983	0.712869	0.818147	0.448411	0.58661	0.343873	0.67453	0.571472	0.493209	0.355004	0.858893	0.484227	0.653823	0.10171	0.731532	0.530911	0.624012	0.560761	0.436102	0.604426
TCGA-IK-8125	0.383688	0.587538	0.566261	0.552636	0.737656	0.800987	0.449039	0.651087	0.417542	0.705498	0.684033	0.549318	0.454794	0.841388	0.510977	0.675724	0.29062	0.767447	0.59025	0.647672	0.613392	0.508902	0.654891
[truncated: 215 more rows]

## Sheet: Supplementary Table 9
Supplementary Table 9: Functional annotation of the differentially expressed genes between the NRGclusters.
[truncated: 190 more rows]

[truncated: 2 more sheets: Supplementary Table 10, Supplementary Table 11]
